# Supplementary material for: Detection of genomic regions associated malformations in newborn piglets: a machine-learning approach
Source: PeerJ. 2021 Jul 22;9:e11580. doi: 10.7717/peerj.11580 (PMC8310618; doi:10.7717/peerj.11580)
Supplement: Supplemental Information 2 [file peerj-09-11580-s002.xls]

## Sheet: Supp T1.Significant SNPs rrBLUP
Supp. Table 1	Significant SNPs identified by rrBLUP
marker	chrom	pos	Legs log10p	Freak log10p	Breed	Trait
ALGA0000218	1	2051900	2.09538	1.3492	LA	Leg
1_2463520	1	2463520	3.44922	0.399742	LA	Leg
ASGA0102762	1	2530735	3.2611	0.607256	LA	Leg
MARC0076778	1	2532393	3.03211	0.671624	LA	Leg
MARC0015795	1	2546844	3.03211	0.671624	LA	Leg
WU_10.2_1_2667200	1	2667200	3.2611	0.607256	LA	Leg
MARC0063358	1	2829500	3.03211	0.671624	LA	Leg
ASGA0000264	1	2950020	2.75932	0.243746	LW	Leg
M1GA0000188	1	3189426	2.31126	0.426179	LA	Leg
WU_10.2_1_3387184	1	3387184	2.26173	0.504995	LA	Leg
ALGA0000120	1	3414845	0.158066	2.17777	LW	Fr
MARC0038011	1	3505464	2.3891	0.236049	LA	Leg
ASGA0000170	1	3533283	2.26173	0.504995	LA	Leg
WU_10.2_1_3560483	1	3560483	2.34955	0.382993	LA	Leg
DRGA0000017	1	5247022	0.00672948	2.23077	LW	Fr
MARC0021584	1	7169568	3.16795	0.292793	LA	Leg
MARC0027411	1	7190448	2.09362	0.202398	LA	Leg
WU_10.2_1_8025743	1	8025743	0.223029	2.57198	LW	Fr
ASGA0000706	1	8564922	0.443537	2.27531	LW	Fr
ALGA0000673	1	8942360	2.49595	0.277392	LW	Leg
WU_10.2_1_9731251	1	9731251	0.257646	3.36209	LW	Fr
M1GA0000672	1	10271509	0.300831	2.05489	LW	Fr
WU_10.2_1_13111948	1	13111948	2.32048	0.292781	LW	Leg
MARC0070235	1	13417613	0.180135	2.08003	LW	Fr
WU_10.2_1_14859615	1	14859615	0.388134	2.48228	LW	Fr
WU_10.2_1_15111641	1	15111641	2.08658	0.247808	LA	Leg
ASGA0001155	1	15420289	2.0689	1.18018	LA	Leg
WU_10.2_1_20253491	1	20253491	2.04813	0.0066379	LW	Leg
WU_10.2_1_22699231	1	22699231	2.01247	0.372091	LA	Leg
ASGA0093046	1	22946567	2.3053	1.43231	LW	Leg
DRGA0000235	1	24603096	0.561579	2.3682	LW	Fr
WU_10.2_1_25984481	1	25984481	0.0391798	2.23947	LW	Fr
ASGA0001701	1	28879715	0.00709643	2.17941	LW	Fr
WU_10.2_1_29501954	1	29501954	0.618139	2.39932	LW	Fr
ASGA0096616	1	30940839	2.16056	0.742565	LW	Leg
ALGA0002083	1	31932239	2.1063	0.396725	LW	Leg
ALGA0002094	1	32097549	0.186189	2.19574	LA	Fr
MARC0034894	1	32403316	0.0680595	2.45456	LA	Fr
H3GA0001269	1	32601824	0.387879	2.0516	LA	Fr
ALGA0002199	1	33058777	0.588973	2.35733	LA	Fr
ASGA0001988	1	33440954	0.264557	2.33061	LW	Fr
DIAS0004542	1	35258448	2.25656	0.620526	LW	Leg
ALGA0116136	1	35281289	2.45328	0.321395	LW	Leg
ALGA0002556	1	37220916	0.219578	2.07221	LW	Fr
ALGA0002766	1	42964863	2.84489	0.529726	LW	Leg
SIRI0000080	1	44013987	1.31767	2.60643	LW	Fr
ASGA0002466	1	45679931	0.422523	2.17657	LW	Fr
DRGA0000678	1	45809391	2.07798	1.64057	LW	Leg
ASGA0103811	1	46907309	0.534801	2.16475	LW	Fr
ASGA0002570	1	49863808	2.2945	0.119215	LW	Leg
ALGA0003292	1	57397818	0.146043	2.05596	LW	Fr
MARC0043932	1	57561914	0.00396232	2.27048	LA	Fr
MARC0026427	1	58622173	0.517874	2.21036	LA	Fr
WU_10.2_1_58927999	1	58927999	2.21139	0.210719	LW	Leg
ASGA0002927	1	60727881	0.196852	2.2133	LA	Fr
ALGA0003539	1	60769684	0.0236732	2.09198	LA	Fr
DIAS0001185	1	60938935	0.196852	2.2133	LA	Fr
SIRI0001021	1	61534580	2.68936	0.160152	LW	Leg
ASGA0002985	1	62684559	0.764923	2.4415	LW	Fr
ALGA0003751	1	65416910	0.0633966	2.53648	LA	Fr
ASGA0003100	1	65464585	0.0633966	2.53648	LA	Fr
ASGA0003102	1	65606656	0.0633966	2.53648	LA	Fr
MARC0026746	1	65878511	0.136849	2.73731	LA	Fr
ALGA0003779	1	66069279	0.136849	2.73731	LA	Fr
ALGA0003788	1	66232889	0.196352	2.11595	LA	Fr
ALGA0003793	1	66263343	0.182553	2.76069	LA	Fr
ALGA0003797	1	66336428	0.0204692	3.0279	LA	Fr
ALGA0003800	1	66381032	0.0204692	3.0279	LA	Fr
DRGA0000994	1	66455394	2.29138	0.105252	LW	Leg
DRGA0000994	1	66455394	0.0878755	2.13247	LA	Fr
ASGA0003137	1	66506265	0.181667	2.7652	LA	Fr
MARC0027557	1	66820206	0.0598984	2.74261	LA	Fr
ALGA0003836	1	67098225	0.0598984	2.74261	LA	Fr
ASGA0003156	1	67111467	0.0598984	2.74261	LA	Fr
ASGA0097137	1	67951385	0.0598984	2.74261	LA	Fr
ASGA0003166	1	68207754	0.0598984	2.74261	LA	Fr
ALGA0003867	1	68342399	0.0598984	2.74261	LA	Fr
MARC0026060	1	69223005	0.204247	2.08956	LA	Fr
ALGA0113051	1	69552297	0.204247	2.08956	LA	Fr
ALGA0109685	1	69554362	0.204247	2.08956	LA	Fr
ASGA0003185	1	69900465	0.204247	2.08956	LA	Fr
ALGA0003892	1	69968051	0.204247	2.08956	LA	Fr
ALGA0003893	1	70002082	0.204247	2.08956	LA	Fr
DRGA0001062	1	70024611	0.204247	2.08956	LA	Fr
ALGA0003900	1	70712755	0.340523	2.24008	LW	Fr
ALGA0004002	1	74502751	2.01873	0.206904	LW	Leg
ALGA0004090	1	76136641	2.51707	0.23961	LW	Leg
ALGA0004177	1	78389441	0.326532	2.05297	LW	Fr
INRA0002837	1	78555890	0.173168	2.37354	LA	Fr
ALGA0004218	1	80728151	2.22367	0.300226	LW	Leg
H3GA0001991	1	80963263	0.379336	3.21943	LA	Fr
ALGA0004245	1	80971384	0.379336	3.21943	LA	Fr
ALGA0004246	1	80989471	0.379336	3.21943	LA	Fr
ASGA0003385	1	80997487	0.379336	3.21943	LA	Fr
ASGA0003511	1	84086508	0.580197	2.75109	LW	Fr
MARC0022047	1	84150234	1.17005	2.09237	LA	Fr
H3GA0002135	1	88590601	1.87742	2.39218	LW	Fr
ALGA0004881	1	99989884	2.10207	0.682356	LW	Leg
ALGA0004886	1	100142509	0.210932	2.50607	LW	Fr
MARC0114221	1	112334349	2.638	0.363288	LW	Leg
INRA0003607	1	116201247	0.0469005	2.96156	LW	Fr
WU_10.2_1_118612696	1	118612696	0.619079	2.05757	LW	Fr
ALGA0005548	1	123334366	0.462192	2.05702	LW	Fr
H3GA0002574	1	123968294	2.50595	0.758912	LA	Leg
MARC0030657	1	124124932	2.74016	1.02941	LA	Leg
H3GA0002682	1	136734471	2.01885	0.112531	LW	Leg
ALGA0005871	1	139567162	0.429281	2.1442	LW	Fr
ALGA0005905	1	140192107	1.0162	2.8179	LA	Fr
ASGA0004574	1	146624170	1.51981	2.09644	LA	Fr
ALGA0106213	1	155062800	0.535803	2.26726	LA	Fr
MARC0010520	1	157470492	0.550543	2.42726	LA	Fr
ASGA0004740	1	159546359	2.0857	0.193972	LW	Leg
ALGA0006411	1	164415280	2.71581	1.09063	LW	Leg
ALGA0006411	1	164415280	0.0944734	2.57789	LA	Fr
ASGA0004896	1	165539919	0.0218914	2.87235	LA	Fr
H3GA0003104	1	177046933	2.45246	0.302109	LW	Leg
WU_10.2_1_177662261	1	177662261	2.93409	1.25256	LW	Leg
ALGA0006725	1	180956401	0.177517	2.01445	LA	Fr
H3GA0003282	1	185541388	0.249138	2.12053	LA	Fr
ALGA0006886	1	185639691	0.479046	2.84574	LW	Fr
MARC0088780	1	185755558	0.0754347	2.1657	LA	Fr
MARC0049963	1	187930689	0.362855	2.02428	LW	Fr
MARC0044611	1	198346039	2.35505	0.914494	LW	Leg
ASGA0005422	1	204669827	0.804592	3.42782	LW	Fr
ALGA0007345	1	208896622	3.23892	0.28524	LW	Leg
ASGA0091065	1	209641807	2.64583	0.165779	LW	Leg
ALGA0007539	1	220517767	0.181263	3.17887	LW	Fr
ALGA0007862	1	239262453	2.09505	1.74952	LW	Leg
ASGA0005696	1	239285364	0.191944	2.16135	LW	Fr
ASGA0005769	1	247096565	0.139085	2.23692	LW	Fr
MARC0086108	1	248044630	2.0087	0.1573	LW	Leg
ALGA0108140	1	248805436	2.18256	0.140503	LW	Leg
ALGA0008236	1	254016770	2.16358	0.495265	LW	Leg
ASGA0006040	1	257570160	0.291612	2.28659	LW	Fr
H3GA0004046	1	267609216	1.54913	2.08192	LA	Fr
ASGA0006400	1	269008819	2.08416	0.00879917	LW	Leg
ASGA0006412	1	269157674	1.15082	2.14615	LW	Fr
ASGA0006416	1	269247699	2.03806	1.02272	LA	Leg
ALGA0008826	1	269269240	2.03806	1.02272	LA	Leg
H3GA0004116	1	269292755	2.03806	1.02272	LA	Leg
ALGA0008860	1	271028077	2.23897	1.59721	LA	Leg
MARC0013167	1	271167367	3.10268	0.440473	LW	Leg
ALGA0008956	1	276338465	0.899609	2.9676	LA	Fr
MARC0033965	1	280528545	2.23258	0.685175	LW	Leg
ALGA0009235	1	282859221	0.311384	2.55813	LW	Fr
ASGA0006803	1	284208765	0.780569	2.30709	LW	Fr
WU_10.2_1_284728902	1	284728902	3.3906	0.0478481	LA	Leg
WU_10.2_1_285304415	1	285304415	2.55074	0.330054	LA	Leg
INRA0007171	1	285510054	2.15244	0.0415409	LA	Leg
ALGA0123303	1	286304789	0.0248737	2.47295	LA	Fr
MARC0001718	1	288345329	2.20996	0.253285	LW	Leg
WU_10.2_1_289692169	1	289692169	2.30816	0.75609	LA	Leg
ALGA0009867	1	291583973	2.90655	0.353598	LW	Leg
ASGA0007260	1	291635775	0.522794	2.26993	LW	Fr
WU_10.2_1_296279931	1	296279931	0.851719	2.3726	LW	Fr
WU_10.2_1_300440935	1	300440935	0.699637	2.15047	LW	Fr
WU_10.2_1_300535387	1	300535387	1.12705	2.51172	LW	Fr
ASGA0007710	1	301493810	2.3958	0.0195734	LW	Leg
MARC0039390	1	305278690	0.0846393	3.16641	LW	Fr
M1GA0001903	1	305774749	1.84645	2.96514	LW	Fr
WU_10.2_1_306704173	1	306704173	0.198302	2.20484	LW	Fr
WU_10.2_1_308352887	1	308352887	2.04091	0.204461	LA	Leg
WU_10.2_1_313019088	1	313019088	0.328844	2.215	LW	Fr
M1GA0025119	2	1021191	0.0353198	2.73436	LW	Fr
ALGA0103099	2	1289212	2.00047	0.234543	LW	Leg
WU_10.2_2_1834913	2	1834913	2.39942	1.31306	LA	Leg
WU_10.2_2_1862888	2	1862888	2.19412	0.423696	LA	Leg
MARC0046316	2	2216738	0.17638	2.131	LW	Fr
WU_10.2_2_2411857	2	2411857	0.698227	2.49949	LA	Fr
WU_10.2_2_2489078	2	2489078	0.397668	2.60446	LA	Fr
H3GA0005515	2	2546707	0.397668	2.60446	LA	Fr
H3GA0005547	2	2732773	0.798201	2.28129	LA	Fr
H3GA0054097	2	4402567	3.00371	0.120258	LW	Leg
ALGA0011510	2	5075058	0.372589	3.29927	LW	Fr
ALGA0011527	2	5200836	0.108699	2.6474	LW	Fr
ASGA0008695	2	5956519	2.81379	0.102089	LW	Leg
MARC0087684	2	10786983	2.01755	0.344795	LW	Leg
ASGA0084128	2	11347122	3.03505	0.819682	LW	Leg
WU_10.2_2_12566137	2	12566137	4.07329	1.92589	LW	Leg
ALGA0119068	2	13621851	0.485847	2.3027	LW	Fr
WU_10.2_2_18471835	2	18471835	2.88899	0.182758	LW	Leg
WU_10.2_2_18920277	2	18920277	1.083	2.93045	LW	Fr
DRGA0002753	2	20263226	0.597541	2.89097	LW	Fr
SIRI0000818	2	21530961	2.21653	0.803254	LW	Leg
WU_10.2_2_23411796	2	23411796	0.0127145	2.09513	LW	Fr
ASGA0105977	2	32319002	0.86957	2.74127	LW	Fr
ISU10000340	2	35434566	0.316879	2.86693	LW	Fr
ALGA0012985	2	36428198	0.71363	2.8056	LW	Fr
MARC0096910	2	36891191	2.41338	0.169602	LW	Leg
ASGA0009945	2	39922393	0.808424	4.28948	LW	Fr
ALGA0013079	2	41011761	2.24699	0.0765823	LW	Leg
MARC0064720	2	41937766	0.632504	2.59579	LW	Fr
ASGA0010116	2	43971719	0.0961592	2.20992	LW	Fr
WU_10.2_2_50875973	2	50875973	0.162709	2.03032	LW	Fr
H3GA0053717	2	67374426	0.9903	2.27625	LW	Fr
WU_10.2_2_75180319	2	75180319	0.579458	2.10487	LW	Fr
WU_10.2_2_80100147	2	80100147	0.278887	4.31369	LW	Fr
M1GA0002987	2	88353987	0.0318404	2.11677	LW	Fr
ASGA0085111	2	90675248	0.889507	2.10933	LW	Fr
MARC0009432	2	93254700	2.79396	0.0112015	LW	Leg
DRGA0003136	2	93588352	1.42776	2.34517	LW	Fr
MARC0068600	2	93857371	0.135721	3.81622	LW	Fr
ALGA0014503	2	97741662	0.524684	2.23349	LW	Fr
DRGA0003186	2	101334206	0.656117	2.72648	LW	Fr
DRGA0003201	2	102371131	0.0192746	2.77112	LW	Fr
ASGA0011039	2	106350971	0.0194733	2.41994	LA	Fr
ALGA0014711	2	107102726	0.367123	2.39055	LA	Fr
ALGA0014758	2	108168175	0.0376392	2.55529	LA	Fr
ALGA0014761	2	108497755	0.0376392	2.55529	LA	Fr
MARC0031604	2	108705999	0.0256942	2.13808	LA	Fr
ALGA0014805	2	109889150	0.142962	2.22654	LA	Fr
ASGA0011111	2	109934488	2.29037	0.166431	LW	Leg
ALGA0014833	2	110719359	0.0391576	2.39832	LA	Fr
CASI0008977	2	111165492	0.104237	3.25588	LA	Fr
ASGA0100062	2	111655922	0.0178499	2.07033	LA	Fr
ALGA0014927	2	113226899	0.247441	2.50424	LA	Fr
SIRI0000913	2	114155657	0.0518716	2.30543	LA	Fr
M1GA0003044	2	116128349	0.071224	2.26192	LA	Fr
H3GA0007331	2	116578393	0.0518716	2.30543	LA	Fr
ASGA0011214	2	116660504	0.0518716	2.30543	LA	Fr
ALGA0014996	2	116712813	0.0518716	2.30543	LA	Fr
ASGA0011308	2	119073051	0.0889272	2.73111	LA	Fr
WU_10.2_2_119211033	2	119211033	0.0117747	2.29925	LA	Fr
WU_10.2_2_124673889	2	124673889	2.07619	0.0937273	LW	Leg
H3GA0055301	2	125353155	0.523646	3.08386	LW	Fr
ASGA0011601	2	125528692	0.512961	2.74787	LW	Fr
DRGA0017490	2	129836792	0.108628	2.11435	LW	Fr
WU_10.2_2_130085091	2	130085091	0.318778	2.57386	LW	Fr
WU_10.2_2_131046421	2	131046421	1.92261	2.04526	LW	Fr
WU_10.2_2_131368867	2	131368867	2.27208	0.137229	LW	Leg
WU_10.2_2_132256003	2	132256003	2.12472	0.579306	LW	Leg
ASGA0084311	2	133061146	0.0523586	2.03814	LW	Fr
ASGA0011904	2	135717652	2.0546	0.664679	LW	Leg
WU_10.2_2_136106145	2	136106145	2.04318	0.442655	LW	Leg
ALGA0016010	2	137184334	2.33527	0.176833	LW	Leg
ALGA0113220	2	144570964	3.60022	1.43474	LW	Leg
H3GA0056614	2	144810961	0.19407	2.22939	LW	Fr
WU_10.2_2_145571735	2	145571735	2.07523	0.12042	LW	Leg
DIAS0003825	2	145637499	0.271997	2.04799	LW	Fr
WU_10.2_2_146141411	2	146141411	0.305537	3.17065	LW	Fr
WU_10.2_2_147456334	2	147456334	0.20923	2.20898	LW	Fr
ALGA0113652	2	150000460	2.27438	0.850676	LW	Leg
2_150381092	2	150381092	0.321836	2.74435	LW	Fr
ALGA0016791	2	151594384	0.11843	2.24561	LW	Fr
ALGA0016865	2	152486966	0.263369	2.22421	LW	Fr
H3GA0055347	2	154116865	2.01859	0.849824	LW	Leg
MARC0070267	2	155528705	2.38264	2.13471	LW	Leg
MARC0070267	2	155528705	2.38264	2.13471	LW	Fr
ALGA0016998	2	157311922	2.07251	0.180779	LW	Leg
WU_10.2_2_158039701	2	158039701	0.69582	2.82855	LW	Fr
WU_10.2_2_159294868	2	159294868	2.55118	0.541014	LW	Leg
WU_10.2_3_1963200	3	1963200	0.568671	3.35909	LA	Fr
ALGA0107591	3	1997344	0.201151	2.12885	LW	Fr
WU_10.2_3_2008244	3	2008244	0.413039	2.06731	LA	Fr
DRGA0003754	3	3029529	2.21116	0.0398524	LW	Leg
WU_10.2_3_3270739	3	3270739	0.430242	2.4194	LA	Fr
WU_10.2_3_4431276	3	4431276	2.06743	0.00846361	LW	Leg
3_6702446	3	6702446	0.785013	3.40113	LW	Fr
ALGA0017541	3	11745371	2.45762	0.132125	LW	Leg
MARC0056315	3	13799553	0.022826	2.25692	LW	Fr
WU_10.2_3_17385360	3	17385360	0.265585	2.73678	LW	Fr
ASGA0099661	3	20691133	0.849953	2.25393	LW	Fr
WU_10.2_3_22459425	3	22459425	2.22463	0.025528	LW	Leg
ALGA0018025	3	22971476	2.48174	0.251583	LW	Leg
ALGA0018202	3	28421828	2.23057	0.769755	LW	Leg
MARC0014155	3	29125205	2.20087	0.261413	LW	Leg
H3GA0009204	3	31597130	2.18079	0.010955	LW	Leg
ALGA0018461	3	34176464	0.583297	2.54607	LW	Fr
ASGA0092767	3	37226080	2.12746	0.386668	LA	Leg
ALGA0018568	3	39881683	3.02614	0.451525	LW	Leg
ALGA0018576	3	43240931	2.94896	0.533605	LW	Leg
WU_10.2_3_43467496	3	43467496	0.182403	2.61011	LW	Fr
H3GA0009344	3	47915429	2.29433	0.635548	LW	Leg
ASGA0014421	3	49053151	2.05841	0.683496	LA	Leg
MARC0000159	3	50734600	2.01833	0.0521422	LW	Leg
WU_10.2_3_52906666	3	52906666	0.262304	2.37069	LW	Fr
MARC0017652	3	54032378	0.691428	2.03908	LA	Fr
WU_10.2_3_54539106	3	54539106	2.14213	0.123765	LW	Leg
SIRI0000006	3	54793883	2.25579	0.716135	LA	Leg
ASGA0014848	3	61810783	0.302214	2.04233	LA	Fr
M1GA0004437	3	71815527	0.150527	2.19265	LA	Fr
ALGA0115738	3	73401689	0.386089	2.01403	LA	Fr
ASGA0015062	3	73620620	0.386089	2.01403	LA	Fr
ASGA0015063	3	73655252	0.386089	2.01403	LA	Fr
WU_10.2_3_73816292	3	73816292	0.386089	2.01403	LA	Fr
WU_10.2_3_73827059	3	73827059	0.386089	2.01403	LA	Fr
H3GA0009917	3	76494328	0.497017	2.00416	LW	Fr
MARC0001022	3	79174785	0.0619819	2.72572	LW	Fr
ASGA0015191	3	80821899	2.21776	0.205027	LA	Leg
ALGA0019863	3	82066148	2.62892	0.149472	LW	Leg
MARC0071306	3	82697045	2.63746	0.129945	LW	Leg
WU_10.2_3_83233266	3	83233266	0.179978	2.4134	LW	Fr
WU_10.2_3_83982616	3	83982616	1.32224	2.26946	LW	Fr
ALGA0019924	3	88291501	0.0473675	2.99974	LA	Fr
DRGA0004057	3	88657782	0.243539	2.01576	LA	Fr
DRGA0004061	3	89713699	0.124478	2.29635	LA	Fr
DIAS0001745	3	91190315	0.113111	2.16055	LA	Fr
ASGA0015270	3	92672161	0.294591	2.12437	LA	Fr
ASGA0098649	3	92716566	2.73878	0.501163	LW	Leg
INRA0011042	3	94325545	0.00943143	2.01476	LA	Fr
ALGA0020034	3	94365885	0.00943143	2.01476	LA	Fr
WU_10.2_3_94657639	3	94657639	0.00943143	2.01476	LA	Fr
WU_10.2_3_95311237	3	95311237	0.00943143	2.01476	LA	Fr
ASGA0015301	3	97947203	0.640816	2.50164	LA	Fr
ASGA0093123	3	98831462	0.458235	3.5203	LA	Fr
ALGA0119199	3	98850536	0.132164	2.75576	LA	Fr
ASGA0015322	3	99626596	0.421546	2.83332	LA	Fr
WU_10.2_3_101090150	3	101090150	2.84944	0.0023409	LA	Leg
WU_10.2_3_101807472	3	101807472	2.00493	0.157566	LA	Leg
ALGA0020335	3	104692463	0.948211	2.03107	LA	Fr
ALGA0020356	3	104902213	2.14292	0.284075	LA	Leg
WU_10.2_3_106453877	3	106453877	2.01247	0.18232	LA	Leg
WU_10.2_3_115062147	3	115062147	0.122073	2.17614	LW	Fr
ASGA0015930	3	115785486	2.30029	1.38411	LW	Leg
WU_10.2_3_117494184	3	117494184	0.382727	2.60385	LW	Fr
MARC0072455	3	118614363	0.387879	2.25572	LA	Fr
WU_10.2_3_119092440	3	119092440	0.0247904	2.13944	LW	Fr
H3GA0010564	3	119339715	0.526501	2.0532	LA	Fr
WU_10.2_3_119467655	3	119467655	0.929791	2.16012	LA	Fr
WU_10.2_3_119659560	3	119659560	2.1377	0.0776699	LW	Leg
WU_10.2_3_119893069	3	119893069	0.287178	2.10438	LW	Fr
WU_10.2_3_121535762	3	121535762	0.283469	3.10185	LW	Fr
WU_10.2_3_121853700	3	121853700	0.496471	2.14967	LA	Fr
ALGA0103469	3	121924158	0.496471	2.14967	LA	Fr
ALGA0107224	3	122259119	0.489199	2.12509	LW	Fr
WU_10.2_3_124045808	3	124045808	0.646484	2.00702	LW	Fr
WU_10.2_3_124682588	3	124682588	0.237049	3.67396	LW	Fr
ASGA0016343	3	125197050	0.386817	2.24535	LA	Fr
DIAS0000055	3	125247182	0.364387	2.09294	LA	Fr
WU_10.2_3_125322744	3	125322744	3.45498	0.621494	LW	Leg
WU_10.2_3_127161757	3	127161757	2.97227	0.637534	LW	Leg
WU_10.2_3_127637670	3	127637670	2.55728	0.766621	LW	Leg
WU_10.2_3_128306222	3	128306222	2.3008	0.317315	LW	Leg
MARC0000971	3	128471642	0.0874276	2.03434	LA	Fr
WU_10.2_3_128616463	3	128616463	0.0439079	2.08319	LA	Fr
WU_10.2_3_128636190	3	128636190	0.0439079	2.08319	LA	Fr
WU_10.2_3_128657995	3	128657995	0.194537	2.2704	LA	Fr
ASGA0103526	3	128757793	0.194537	2.2704	LA	Fr
WU_10.2_3_128911719	3	128911719	0.194537	2.2704	LA	Fr
INRA0011644	3	129041676	0.23664	2.14256	LA	Fr
ALGA0021329	3	129063098	0.0956023	2.20639	LA	Fr
WU_10.2_3_129122235	3	129122235	2.17533	0.406562	LW	Leg
WU_10.2_3_129220518	3	129220518	2.06404	0.000580809	LW	Leg
ALGA0021371	3	129444327	0.175805	2.42211	LA	Fr
ALGA0105306	3	134008198	2.29806	0.490736	LW	Leg
MARC0041460	3	140452896	0.206044	2.17598	LA	Fr
WU_10.2_3_143899548	3	143899548	0.479019	2.08826	LW	Fr
WU_10.2_4_1301683	4	1301683	0.69416	2.19796	LW	Fr
WU_10.2_4_1897808	4	1897808	2.61656	0.107489	LW	Leg
MARC0034221	4	2035615	2.14693	0.584013	LW	Leg
WU_10.2_4_2477689	4	2477689	0.297946	2.79439	LW	Fr
ASGA0017090	4	2495035	0.046506	2.33516	LW	Fr
ALGA0022167	4	3286257	2.32311	0.499088	LW	Leg
MARC0080116	4	3550229	2.17782	0.357386	LW	Leg
WU_10.2_4_3786587	4	3786587	0.64052	2.18102	LW	Fr
H3GA0011463	4	4623505	2.06037	0.130942	LW	Leg
ASGA0017588	4	5985544	2.46184	0.215778	LW	Leg
WU_10.2_4_8565624	4	8565624	0.243067	2.18123	LW	Fr
MARC0113080	4	8901794	2.73494	0.357092	LW	Leg
ASGA0018487	4	14708368	2.50275	0.037009	LW	Leg
DRGA0004480	4	15016104	1.05294	2.52483	LW	Fr
WU_10.2_4_15738038	4	15738038	0.0615809	2.88236	LW	Fr
WU_10.2_4_17513485	4	17513485	2.34722	0.144674	LW	Leg
ALGA0023676	4	17749358	0.78017	2.23084	LW	Fr
WU_10.2_4_18502471	4	18502471	0.344132	3.20266	LW	Fr
ALGA0023970	4	21945490	0.0300426	2.76737	LW	Fr
DRGA0004577	4	21990523	2.20591	0.0803148	LW	Leg
WU_10.2_4_22511172	4	22511172	0.0230101	2.81609	LW	Fr
DRGA0004616	4	25899175	0.256556	2.75179	LW	Fr
ALGA0024426	4	34469345	3.30994	1.03167	LW	Leg
ASGA0019200	4	34853444	2.0779	0.161157	LW	Leg
ASGA0019230	4	35530467	2.8951	0.196231	LW	Leg
DRGA0004732	4	37266371	2.5254	0.0439874	LW	Leg
INRA0013662	4	37690911	2.51276	0.364581	LW	Leg
ASGA0019349	4	38707173	4.07722	0.915467	LW	Leg
MARC0016450	4	40634476	2.36564	0.489075	LW	Leg
WU_10.2_4_41985286	4	41985286	0.163743	2.16294	LA	Fr
MARC0029171	4	52747424	0.022638	2.1072	LW	Fr
H3GA0012728	4	60595174	2.03001	0.258984	LW	Leg
ASGA0019799	4	64334764	2.05835	0.388276	LW	Leg
ASGA0019976	4	71376919	2.29779	0.162059	LW	Leg
INRA0014618	4	73907009	0.353432	2.08849	LW	Fr
ASGA0020137	4	78441472	0.158443	2.29965	LW	Fr
H3GA0012943	4	78459865	2.00726	0.508011	LA	Leg
H3GA0012998	4	79740870	1.15721	2.30555	LW	Fr
MARC0084093	4	81492164	0.179923	2.21634	LW	Fr
INRA0015158	4	86856101	0.713048	2.18589	LW	Fr
WU_10.2_4_90789475	4	90789475	0.0153525	2.02496	LW	Fr
WU_10.2_4_90870654	4	90870654	2.02462	0.378454	LW	Leg
ALGA0026520	4	95421304	2.0799	0.301081	LW	Leg
H3GA0013326	4	95561019	0.0921926	2.39523	LW	Fr
ASGA0020705	4	96048342	0.301418	2.07911	LW	Fr
MARC0045184	4	96188669	2.39554	0.0344895	LW	Leg
INRA0015544	4	98878186	2.97521	0.967071	LW	Leg
DBWU0001050	4	103449369	2.43792	0.180634	LW	Leg
H3GA0013702	4	107497631	2.30166	0.16493	LW	Leg
ASGA0021398	4	109905911	2.56475	1.28473	LA	Leg
WU_10.2_4_111764585	4	111764585	3.76594	0.0117131	LW	Leg
WU_10.2_4_111790296	4	111790296	2.31824	0.285308	LW	Leg
ALGA0027476	4	112591234	0.478416	2.36214	LW	Fr
DRGA0005041	4	112918878	1.57442	2.22078	LA	Fr
MARC0035800	4	113067746	1.94021	2.20486	LA	Fr
WU_10.2_4_113486318	4	113486318	2.02793	1.93752	LA	Leg
4_113564362	4	113564362	3.67821	0.250038	LW	Leg
H3GA0013923	4	114290737	2.1071	2.37322	LA	Leg
H3GA0013923	4	114290737	2.1071	2.37322	LA	Fr
ALGA0027621	4	114384663	2.02304	2.28008	LA	Leg
ALGA0027621	4	114384663	2.02304	2.28008	LA	Fr
ASGA0021657	4	114560092	2.28839	2.72852	LA	Leg
ASGA0021657	4	114560092	2.28839	2.72852	LA	Fr
M1GA0006309	4	114716226	2.07729	2.18024	LA	Leg
M1GA0006309	4	114716226	2.07729	2.18024	LA	Fr
ASGA0021673	4	114804404	2.6783	1.90925	LA	Leg
WU_10.2_4_114862594	4	114862594	2.6783	1.90925	LA	Leg
ALGA0027667	4	114931735	0.150714	2.19533	LW	Fr
MARC0109265	4	118774035	1.51927	2.37957	LA	Fr
WU_10.2_4_118848723	4	118848723	2.37916	1.65438	LA	Leg
WU_10.2_4_118871144	4	118871144	2.48805	2.33555	LA	Leg
WU_10.2_4_118871144	4	118871144	2.48805	2.33555	LA	Fr
4_118902536	4	118902536	2.02392	2.13576	LA	Leg
4_118902536	4	118902536	2.02392	2.13576	LA	Fr
WU_10.2_4_119810701	4	119810701	2.07024	0.81142	LA	Leg
ALGA0028270	4	122895964	2.15494	0.150442	LW	Leg
DRGA0017375	4	124409324	0.0681296	2.32271	LA	Fr
WU_10.2_4_124862349	4	124862349	0.145016	2.21158	LA	Fr
ALGA0028417	4	124901091	0.0144219	2.98374	LA	Fr
ALGA0028434	4	124982191	0.0144219	2.98374	LA	Fr
ALGA0028434	4	124982191	0.307356	2.01478	LW	Fr
WU_10.2_4_125219797	4	125219797	0.218823	2.72319	LA	Fr
CASI0009814	4	125507035	0.113736	2.65909	LA	Fr
H3GA0014330	4	125788612	2.319	0.0262146	LW	Leg
MARC0101639	4	129079594	2.05018	1.51061	LA	Leg
ALGA0028632	4	129172178	2.05018	1.51061	LA	Leg
WU_10.2_4_130082351	4	130082351	2.36786	0.0122725	LW	Leg
ALGA0028864	4	132122229	2.29121	0.356543	LW	Leg
WU_10.2_4_133730738	4	133730738	0.464729	2.179	LW	Fr
ASGA0022949	4	134770498	0.789828	2.54529	LW	Fr
ASGA0022943	4	134848890	0.101697	2.89687	LW	Fr
ASGA0022902	4	135071804	3.29514	0.329042	LW	Leg
WU_10.2_4_139418546	4	139418546	2.71918	0.779276	LA	Leg
WU_10.2_4_140106958	4	140106958	2.71918	0.779276	LA	Leg
ASGA0023722	5	1621034	2.31484	0.51479	LW	Leg
5_1712710	5	1712710	2.41927	1.32752	LW	Leg
WU_10.2_5_3571301	5	3571301	2.05483	0.0254121	LA	Leg
ASGA0023919	5	4253826	0.0418979	2.02344	LA	Fr
MARC0095119	5	4798838	0.118095	2.06933	LA	Fr
WU_10.2_5_5201152	5	5201152	0.118095	2.06933	LA	Fr
5_5217902	5	5217902	0.118095	2.06933	LA	Fr
ALGA0030091	5	5363246	2.00738	0.0875247	LW	Leg
WU_10.2_5_5396906	5	5396906	0.118095	2.06933	LA	Fr
ASGA0024007	5	5410296	0.567651	2.37995	LA	Fr
WU_10.2_5_5576485	5	5576485	0.309421	2.82938	LA	Fr
DRGA0005437	5	5588698	0.237639	2.42347	LA	Fr
WU_10.2_5_5603381	5	5603381	0.237639	2.42347	LA	Fr
WU_10.2_5_5954763	5	5954763	0.0284452	2.4375	LA	Fr
WU_10.2_5_6929796	5	6929796	0.116495	3.61376	LW	Fr
WU_10.2_5_7718949	5	7718949	0.985163	2.34098	LA	Fr
ASGA0093987	5	7800850	0.588973	2.60036	LA	Fr
ALGA0108327	5	8184337	1.07183	2.18806	LA	Fr
MARC0087118	5	8231971	0.956611	2.21286	LA	Fr
ASGA0084419	5	8242870	0.956611	2.21286	LA	Fr
ASGA0024585	5	13502602	2.76454	0.45252	LW	Leg
WU_10.2_5_15838473	5	15838473	3.59647	0.564369	LW	Leg
ALGA0031033	5	18962460	0.710428	2.07397	LA	Fr
WU_10.2_5_20616345	5	20616345	0.939781	2.38179	LA	Fr
WU_10.2_5_21750544	5	21750544	0.985722	2.42833	LA	Fr
WU_10.2_5_22344821	5	22344821	0.857367	2.37797	LA	Fr
WU_10.2_5_24835149	5	24835149	2.10468	0.530228	LA	Leg
ASGA0025137	5	25705601	2.23991	0.471051	LA	Leg
ALGA0031314	5	25837099	2.23991	0.471051	LA	Leg
ASGA0025140	5	25906322	2.23991	0.471051	LA	Leg
ASGA0083598	5	31787290	0.239276	2.82624	LW	Fr
ASGA0099194	5	36871023	2.26041	0.8861	LW	Leg
DRGA0005702	5	39775046	2.059	0.128903	LW	Leg
ALGA0031790	5	42523893	0.274255	2.35071	LW	Fr
ASGA0025490	5	46458445	0.648189	2.42092	LW	Fr
DRGA0005841	5	53887117	2.71549	0.306641	LW	Leg
WU_10.2_5_57572617	5	57572617	0.168432	2.89339	LW	Fr
WU_10.2_5_59759709	5	59759709	2.10029	0.41091	LA	Leg
ASGA0025603	5	60817695	2.13064	0.441545	LA	Leg
WU_10.2_5_63191063	5	63191063	2.55642	0.79353	LA	Leg
ALGA0109365	5	63209620	2.63358	0.400234	LA	Leg
H3GA0016442	5	63305961	2.94707	1.27857	LA	Leg
WU_10.2_5_64468753	5	64468753	2.03728	0.637509	LA	Leg
WU_10.2_5_64468753	5	64468753	0.154419	2.66218	LW	Fr
WU_10.2_5_64906087	5	64906087	2.15507	0.171919	LW	Leg
DIAS0000951	5	65361223	3.49415	0.316854	LW	Leg
ALGA0032376	5	66650848	3.25299	0.223187	LW	Leg
ALGA0032548	5	69369016	0.05214	2.81377	LW	Fr
ASGA0094057	5	69865182	0.449378	2.0522	LA	Fr
H3GA0016723	5	71394885	0.175917	2.207	LW	Fr
H3GA0016731	5	71416135	2.40066	1.00713	LW	Leg
H3GA0016767	5	71723642	3.63983	0.629403	LW	Leg
WU_10.2_5_74963664	5	74963664	0.161538	2.09964	LW	Fr
ALGA0032903	5	76605884	0.09808	2.48221	LA	Fr
ALGA0033035	5	79977136	3.02658	0.192235	LW	Leg
ALGA0033095	5	82304070	2.58508	0.722792	LW	Leg
MARC0006404	5	84459710	0.679467	2.13738	LW	Fr
M1GA0008064	5	85112008	2.7726	1.51486	LW	Leg
H3GA0016979	5	86657251	0.430242	2.03042	LA	Fr
WU_10.2_5_86740231	5	86740231	0.430242	2.03042	LA	Fr
WU_10.2_5_87066988	5	87066988	0.198387	2.00194	LA	Fr
MARC0086639	5	87211843	0.187654	2.09314	LA	Fr
ALGA0033247	5	87310700	0.2832	2.20875	LA	Fr
WU_10.2_5_87701345	5	87701345	0.113917	2.66719	LA	Fr
WU_10.2_5_88261301	5	88261301	0.215873	3.81092	LW	Fr
WU_10.2_5_88932570	5	88932570	0.449654	2.63211	LW	Fr
ASGA0090981	5	89645922	0.0971079	2.07414	LW	Fr
WU_10.2_5_90514333	5	90514333	0.184894	2.25461	LW	Fr
ALGA0033557	5	95435671	3.78387	0.64124	LW	Leg
WU_10.2_5_96716912	5	96716912	0.408667	2.26937	LW	Fr
WU_10.2_5_96899179	5	96899179	0.770711	2.0599	LW	Fr
INRA0020396	5	97184009	2.02772	0.88627	LW	Leg
WU_10.2_5_98140394	5	98140394	0.220278	2.13255	LW	Fr
ALGA0033673	5	100322783	2.16276	0.522258	LW	Leg
DRGA0006216	5	100422852	0.279668	2.85929	LW	Fr
WU_10.2_5_100577873	5	100577873	0.179547	2.18407	LW	Fr
WU_10.2_5_100667458	5	100667458	2.73567	0.102268	LA	Leg
ASGA0026918	5	100814675	0.807738	2.3999	LA	Fr
ALGA0033799	5	101013243	0.371426	2.25575	LA	Fr
MARC0026306	5	101235885	0.335411	2.08029	LW	Fr
WU_10.2_5_103536462	5	103536462	0.155923	2.74794	LA	Fr
ASGA0027013	5	103857803	0.0173712	2.04705	LW	Fr
ASGA0027129	5	105906252	2.40982	0.110552	LW	Leg
WU_10.2_5_109723467	5	109723467	2.03145	0.246093	LW	Leg
WU_10.2_5_110482927	5	110482927	0.620846	2.30754	LW	Fr
WU_10.2_5_111453206	5	111453206	0.202712	2.71632	LA	Fr
WU_10.2_5_111505449	5	111505449	0.134847	2.0296	LW	Fr
WU_10.2_6_347445	6	347445	0.685046	2.05138	LA	Fr
WU_10.2_6_1345836	6	1345836	0.0192909	2.34343	LA	Fr
H3GA0056153	6	2568290	2.08684	0.785848	LW	Leg
WU_10.2_6_4185935	6	4185935	2.29438	0.0623578	LW	Leg
WU_10.2_6_4612330	6	4612330	2.12456	0.111886	LW	Leg
ASGA0084418	6	4833118	0.0205231	2.07466	LA	Fr
MARC0019347	6	5375928	0.0166885	2.13351	LA	Fr
MARC0064401	6	5789056	0.0661938	2.22022	LA	Fr
WU_10.2_6_5910475	6	5910475	0.0709521	2.23697	LA	Fr
WU_10.2_6_5969760	6	5969760	0.0709521	2.23697	LA	Fr
WU_10.2_6_6032615	6	6032615	0.118844	2.49225	LA	Fr
M1GA0008329	6	7363656	0.023777	2.63254	LA	Fr
MARC0006941	6	7717694	0.1281	2.5257	LA	Fr
WU_10.2_6_8256679	6	8256679	0.0576939	2.02988	LA	Fr
WU_10.2_6_8269677	6	8269677	0.121019	2.0811	LA	Fr
ALGA0116973	6	8340755	0.158889	2.25093	LA	Fr
ALGA0034574	6	11889992	0.0981318	3.17009	LW	Fr
WU_10.2_6_13408828	6	13408828	3.75552	0.415852	LW	Leg
WU_10.2_6_14541639	6	14541639	1.50322	2.21205	LA	Fr
ALGA0121849	6	14620144	1.50322	2.21205	LA	Fr
WU_10.2_6_14715584	6	14715584	1.50322	2.21205	LA	Fr
WU_10.2_6_14739014	6	14739014	1.50322	2.21205	LA	Fr
WU_10.2_6_14762103	6	14762103	1.50322	2.21205	LA	Fr
WU_10.2_6_14798027	6	14798027	1.50322	2.21205	LA	Fr
ASGA0096326	6	14813373	1.50322	2.21205	LA	Fr
ALGA0116140	6	14835435	1.50322	2.21205	LA	Fr
WU_10.2_6_14870390	6	14870390	1.50322	2.21205	LA	Fr
ALGA0034631	6	14905615	1.50322	2.21205	LA	Fr
WU_10.2_6_14929389	6	14929389	1.50322	2.21205	LA	Fr
WU_10.2_6_14953658	6	14953658	1.50322	2.21205	LA	Fr
WU_10.2_6_14973509	6	14973509	1.50322	2.21205	LA	Fr
WU_10.2_6_15059064	6	15059064	1.50322	2.21205	LA	Fr
WU_10.2_6_15095036	6	15095036	1.50322	2.21205	LA	Fr
ASGA0027648	6	15109428	1.50322	2.21205	LA	Fr
M1GA0008368	6	15159804	0.708212	2.43965	LA	Fr
WU_10.2_6_15244520	6	15244520	0.944894	2.22029	LA	Fr
MARC0041561	6	15255562	0.944894	2.22029	LA	Fr
WU_10.2_6_16132537	6	16132537	2.38589	0.0534296	LW	Leg
DIAS0000651	6	17718192	0.0206736	2.78972	LW	Fr
DIAS0000453	6	17917275	2.32842	0.141654	LW	Leg
ALGA0119161	6	18278557	2.01016	0.195639	LW	Leg
WU_10.2_6_19157647	6	19157647	3.92306	0.667087	LW	Leg
H3GA0017685	6	20641134	2.17981	0.00492263	LW	Leg
ALGA0034836	6	21096843	2.16398	0.486492	LW	Leg
WU_10.2_6_21360617	6	21360617	2.80672	0.0805657	LW	Leg
WU_10.2_6_26917682	6	26917682	2.19796	0.130998	LW	Leg
WU_10.2_6_27361791	6	27361791	0.192618	2.00045	LW	Fr
WU_10.2_6_28457265	6	28457265	2.49734	0.499693	LW	Leg
6_30442587	6	30442587	1.18417	2.18633	LW	Fr
WU_10.2_6_31712639	6	31712639	0.361314	2.20544	LW	Fr
ASGA0084373	6	35967061	1.50253	2.18135	LA	Fr
ALGA0105590	6	37711539	0.516038	3.4486	LW	Fr
6_39108493	6	39108493	0.171082	2.40538	LA	Fr
MARC0020138	6	56948678	2.35524	1.05796	LW	Leg
ASGA0091283	6	68823162	3.52684	0.792174	LW	Leg
MARC0088052	6	68861139	0.812512	2.54715	LW	Fr
WU_10.2_6_69302787	6	69302787	0.0277946	2.32446	LW	Fr
MARC0016710	6	71271642	2.49377	0.127846	LW	Leg
ASGA0096327	6	71303189	0.306806	2.20586	LW	Fr
ALGA0120083	6	72172049	0.163721	2.1668	LW	Fr
ASGA0083165	6	73127988	3.28417	0.547887	LW	Leg
ALGA0119811	6	73201165	0.105047	2.58601	LW	Fr
DIAS0001243	6	75455350	0.151891	2.44003	LW	Fr
ASGA0104276	6	75849757	0.152446	2.45197	LW	Fr
ASGA0098580	6	76074229	0.259449	3.52153	LW	Fr
ASGA0028724	6	78297229	2.36597	0.456097	LW	Leg
MARC0018089	6	79884591	2.40638	0.309997	LW	Leg
MARC0016269	6	81252063	2.65628	1.03129	LW	Leg
WU_10.2_6_81627673	6	81627673	2.30586	0.0769339	LW	Leg
ASGA0028788	6	81775011	2.4323	0.511916	LW	Leg
ASGA0028781	6	81785630	2.5402	0.500255	LW	Leg
ASGA0100422	6	85495486	0.118913	2.35734	LW	Fr
ALGA0035952	6	85740131	2.84469	0.0779404	LW	Leg
INRA0021679	6	85830735	2.01199	0.236606	LW	Leg
ALGA0035975	6	86899252	0.113819	3.60796	LW	Fr
WU_10.2_6_90055021	6	90055021	2.6533	1.2016	LW	Leg
ALGA0111890	6	90920481	0.0465426	2.11583	LW	Fr
ALGA0036219	6	95377884	0.143493	2.36493	LW	Fr
H3GA0018606	6	95675023	2.37966	0.118717	LW	Leg
ALGA0114685	6	98510794	2.16907	0.0987109	LW	Leg
ASGA0029138	6	99847064	1.1792	4.04586	LW	Fr
MARC0020494	6	107035144	2.44299	0.381858	LW	Leg
ASGA0101965	6	108646700	1.57758	2.08205	LW	Fr
ALGA0065555	6	112385654	2.87969	0.329855	LW	Leg
MARC0109198	6	113590864	2.12618	0.0133829	LW	Leg
MARC0032588	6	118157644	0.403001	3.398	LW	Fr
ASGA0098556	6	121919064	2.41793	0.0985385	LW	Leg
ALGA0036742	6	122231130	0.349971	2.15018	LW	Fr
ALGA0036767	6	123525306	0.427538	2.38303	LW	Fr
WU_10.2_6_123923562	6	123923562	0.632205	2.08315	LW	Fr
WU_10.2_6_138456232	6	138456232	2.02432	0.656917	LW	Leg
WU_10.2_6_138715609	6	138715609	2.37822	0.578803	LW	Leg
WU_10.2_6_138837788	6	138837788	2.22659	0.361576	LW	Leg
WU_10.2_6_141808685	6	141808685	0.13536	2.16441	LW	Fr
WU_10.2_6_143355226	6	143355226	0.0606632	3.04888	LW	Fr
WU_10.2_6_143640843	6	143640843	2.93641	0.0948406	LW	Leg
WU_10.2_6_143799101	6	143799101	2.66163	0.716589	LW	Leg
WU_10.2_6_144891502	6	144891502	2.04615	0.81294	LA	Leg
WU_10.2_6_148658295	6	148658295	0.361239	2.39793	LW	Fr
ALGA0116804	6	151102117	2.02945	0.122873	LW	Leg
WU_10.2_6_151302031	6	151302031	2.45289	0.166028	LW	Leg
ALGA0037770	6	154344160	0.278018	2.0598	LA	Fr
WU_10.2_6_157760766	6	157760766	2.79942	0.632506	LW	Leg
WU_10.2_7_684039	7	684039	2.94542	0.435917	LW	Leg
WU_10.2_7_2004974	7	2004974	0.67291	2.58024	LW	Fr
WU_10.2_7_4248910	7	4248910	0.513271	2.61905	LW	Fr
WU_10.2_7_4843863	7	4843863	2.08173	1.10687	LW	Leg
WU_10.2_7_7991938	7	7991938	0.309152	2.18414	LW	Fr
ALGA0038434	7	8871000	2.94179	0.289397	LW	Leg
WU_10.2_7_10774123	7	10774123	0.8667	2.21842	LW	Fr
WU_10.2_7_11422466	7	11422466	3.20744	0.104972	LW	Leg
DRGA0007148	7	14250404	2.70966	0.0284348	LW	Leg
H3GA0020057	7	14524296	2.20283	0.203836	LW	Leg
MARC0107576	7	15528712	2.19899	0.0276379	LW	Leg
WU_10.2_7_16120808	7	16120808	0.0982682	2.01047	LW	Fr
MARC0112781	7	18528143	2.34149	0.0418546	LW	Leg
MARC0014928	7	19147175	1.42323	2.25436	LW	Fr
WU_10.2_7_19981304	7	19981304	2.02698	1.08244	LW	Leg
DRGA0007281	7	20159272	0.254433	2.08628	LW	Fr
H3GA0020315	7	22987329	2.45549	0.545578	LW	Leg
DRGA0007345	7	23667098	0.221321	2.1282	LW	Fr
ASGA0031860	7	24017747	2.46509	0.4189	LW	Leg
WU_10.2_7_25250110	7	25250110	0.629013	2.56248	LW	Fr
DIAS0001001	7	26822610	0.812928	2.45175	LW	Fr
M1GA0009803	7	28080540	0.11532	2.05379	LA	Fr
ALGA0039710	7	28849375	1.25666	2.30111	LW	Fr
INRA0024482	7	29619407	2.49911	0.0240653	LW	Leg
ALGA0039905	7	31123486	0.11532	2.00769	LA	Fr
H3GA0020922	7	38055859	0.0678798	2.00774	LW	Fr
ALGA0040467	7	38400663	0.144148	2.45646	LW	Fr
MARC0001110	7	39380322	0.301469	2.32629	LW	Fr
H3GA0021205	7	42542575	0.509173	2.48499	LW	Fr
WU_10.2_7_45126587	7	45126587	0.630125	2.17184	LW	Fr
ALGA0041036	7	47131525	2.03426	0.256272	LW	Leg
MARC0062453	7	50174844	4.87406	0.202529	LW	Leg
MARC0045603	7	51233941	0.0661709	2.17408	LW	Fr
ALGA0042183	7	59039109	2.0186	0.504893	LW	Leg
INRA0026076	7	59479735	2.64623	1.04163	LW	Leg
ASGA0034277	7	63617428	0.415355	3.59224	LW	Fr
ASGA0034309	7	65051248	0.0593854	2.59711	LW	Fr
ALGA0042336	7	65683817	0.271139	2.45051	LW	Fr
ALGA0042436	7	70614742	2.04483	0.0528022	LW	Leg
ALGA0042465	7	71706105	2.06752	1.81505	LW	Leg
DRGA0007831	7	78420342	2.2045	0.73352	LW	Leg
MARC0015900	7	86719946	2.59252	1.21095	LW	Leg
ASGA0034775	7	90329629	0.486113	3.00272	LW	Fr
WU_10.2_7_91252567	7	91252567	3.08086	0.368701	LW	Leg
M1GA0010526	7	92443009	2.02747	0.579174	LW	Leg
ALGA0043295	7	92687930	0.0378376	2.0185	LW	Fr
ALGA0043766	7	99414250	3.19091	0.051167	LW	Leg
WU_10.2_7_101576422	7	101576422	2.11344	0.790471	LW	Leg
WU_10.2_7_101846292	7	101846292	2.71325	0.130801	LW	Leg
ASGA0035486	7	102792552	2.58348	0.594939	LW	Leg
MARC0086617	7	104051815	2.20041	0.383312	LW	Leg
ASGA0035590	7	105471812	2.22008	1.10879	LW	Leg
ASGA0035741	7	107618108	0.713029	2.1763	LW	Fr
WU_10.2_7_107830336	7	107830336	2.1699	2.57275	LA	Leg
WU_10.2_7_107830336	7	107830336	2.1699	2.57275	LA	Fr
ASGA0035769	7	108716194	0.463876	2.82843	LW	Fr
WU_10.2_7_113870284	7	113870284	2.25153	0.0177129	LW	Leg
DRGA0008117	7	114977348	0.08604	2.02079	LW	Fr
WU_10.2_7_116017747	7	116017747	2.44371	0.599092	LW	Leg
MARC0095298	7	116247953	0.606207	2.08379	LW	Fr
DIAS0001022	7	116911314	0.903294	2.55927	LW	Fr
ASGA0036179	7	118035096	0.140303	3.06196	LW	Fr
WU_10.2_7_120716623	7	120716623	0.369208	3.48262	LW	Fr
M1GA0010832	7	121055893	0.744279	2.58867	LA	Fr
WU_10.2_7_121432864	7	121432864	0.385991	2.20168	LW	Fr
ALGA0045854	7	130959924	2.16541	1.18831	LA	Leg
ASGA0037264	7	131034870	0.136941	2.05209	LW	Fr
H3GA0023925	7	132367408	2.33645	0.188856	LW	Leg
ALGA0045997	7	134459770	0.149337	2.09129	LW	Fr
ALGA0105748	8	3350925	0.0336025	2.64553	LW	Fr
ASGA0037667	8	6418250	2.33216	0.122158	LW	Leg
ASGA0098997	8	8367943	0.0875583	2.15428	LW	Fr
WU_10.2_8_10962611	8	10962611	0.350624	2.65816	LW	Fr
ALGA0046501	8	12844147	0.0224038	2.00561	LA	Fr
ALGA0046509	8	12906046	0.0224038	2.00561	LA	Fr
DRGA0008319	8	13951282	1.0937	3.5453	LW	Fr
WU_10.2_8_13977071	8	13977071	2.57629	0.213299	LW	Leg
MARC0052560	8	15012713	2.71665	0.46085	LW	Leg
MARC0012364	8	19139604	2.54965	0.470666	LA	Leg
ASGA0105209	8	19141978	2.54965	0.470666	LA	Leg
H3GA0024530	8	23601551	0.657045	2.67054	LW	Fr
MARC0048798	8	24707958	0.0806696	2.25519	LW	Fr
MARC0059842	8	27768176	2.04091	0.306697	LA	Leg
WU_10.2_8_27860263	8	27860263	2.04091	0.306697	LA	Leg
ALGA0047140	8	29337109	0.307349	2.27494	LW	Fr
WU_10.2_8_29434164	8	29434164	0.134886	2.35798	LW	Fr
H3GA0024679	8	31495164	2.19508	1.3807	LW	Leg
ASGA0038488	8	31688580	2.31295	0.693787	LW	Leg
H3GA0024720	8	33282831	0.326511	2.82299	LW	Fr
ALGA0047464	8	34622553	2.1478	0.322778	LW	Leg
WU_10.2_8_37289263	8	37289263	2.25905	0.20738	LW	Leg
ASGA0038761	8	41542737	0.462154	2.6364	LW	Fr
MARC0029724	8	47035822	2.25571	0.168013	LW	Leg
MARC0077695	8	53929233	0.214326	2.6349	LW	Fr
ALGA0047923	8	58000986	0.0376959	2.51812	LW	Fr
MARC0041089	8	59080961	0.134183	2.16946	LW	Fr
WU_10.2_8_76025664	8	76025664	2.00914	0.0699422	LA	Leg
ASGA0102538	8	77966205	2.532	0.0302541	LA	Leg
H3GA0024981	8	78209229	0.296709	2.70196	LW	Fr
WU_10.2_8_78300954	8	78300954	2.9269	0.195546	LA	Leg
WU_10.2_8_78348321	8	78348321	2.9269	0.195546	LA	Leg
WU_10.2_8_78348321	8	78348321	0.249359	2.15649	LW	Fr
MARC0060469	8	78379537	0.200238	2.01726	LW	Fr
WU_10.2_8_80223477	8	80223477	1.21185	2.29656	LW	Fr
ALGA0048275	8	80555496	2.10155	0.0738602	LA	Leg
ASGA0101844	8	81243428	0.468281	2.51954	LA	Fr
ASGA0039152	8	87649455	2.64651	0.419981	LW	Leg
ALGA0048468	8	90652258	0.124905	2.72976	LW	Fr
ALGA0048654	8	96775500	0.571065	2.29819	LW	Fr
ALGA0102245	8	104961048	1.52999	2.46533	LW	Fr
ALGA0117660	8	107682936	0.00593539	2.02392	LW	Fr
ALGA0123719	8	110162791	0.722053	2.37969	LW	Fr
WU_10.2_8_111286492	8	111286492	2.56195	0.428036	LW	Leg
WU_10.2_8_115780478	8	115780478	0.770415	2.37946	LW	Fr
ASGA0039584	8	116864383	1.03357	2.14445	LW	Fr
INRA0030422	8	119851321	0.197105	2.17493	LW	Fr
ALGA0104190	8	126689298	0.156868	2.26566	LW	Fr
DRGA0017495	8	128270296	0.345394	2.93333	LW	Fr
H3GA0025423	8	129513824	0.24142	2.73408	LW	Fr
ALGA0049466	8	130722624	0.352772	2.09896	LW	Fr
8_130734412	8	130734412	2.05678	0.216581	LW	Leg
WU_10.2_8_132168196	8	132168196	0.112858	2.03461	LW	Fr
MARC0031261	8	134024195	2.8943	0.151029	LW	Leg
H3GA0025481	8	134362111	0.0236489	2.05007	LW	Fr
ALGA0103265	8	134911055	2.29394	0.0629842	LW	Leg
M1GA0012065	8	138635995	2.17737	0.0382719	LW	Leg
WU_10.2_8_139487339	8	139487339	2.39595	0.248832	LW	Leg
ALGA0049821	8	139750510	2.66496	0.335416	LW	Leg
SIRI0001264	8	142347892	0.641921	2.18745	LW	Fr
WU_10.2_8_143670150	8	143670150	0.0959757	2.00765	LW	Fr
ASGA0097617	8	145302439	2.26676	0.92873	LW	Leg
ASGA0098855	8	147209492	0.613328	2.08993	LW	Fr
MARC0069524	8	147729168	0.652147	2.41424	LW	Fr
ASGA0085364	9	854408	0.891962	2.05826	LW	Fr
H3GA0025901	9	1626616	2.01641	0.151872	LA	Leg
ALGA0103198	9	2316451	2.32231	0.00270278	LA	Leg
WU_10.2_9_4121521	9	4121521	3.33597	1.24503	LW	Leg
ALGA0116954	9	6308875	2.48735	0.641199	LW	Leg
ASGA0041308	9	9054750	2.34109	1.55146	LW	Leg
M1GA0012575	9	9135517	2.45405	0.0277306	LW	Leg
MARC0087144	9	10482333	0.0328981	3.08319	LW	Fr
H3GA0026474	9	11394193	2.13697	0.588651	LW	Leg
MARC0059260	9	11444610	0.383854	2.31404	LW	Fr
WU_10.2_9_12418244	9	12418244	2.75169	0.617134	LW	Leg
WU_10.2_9_12546665	9	12546665	2.23594	0.156058	LW	Leg
WU_10.2_9_13099502	9	13099502	2.03209	0.131497	LW	Leg
WU_10.2_9_14048601	9	14048601	0.448337	2.05929	LW	Fr
ALGA0051662	9	16659495	2.18597	0.298061	LW	Leg
WU_10.2_9_18176660	9	18176660	0.147683	2.5526	LA	Fr
WU_10.2_9_18396400	9	18396400	0.147683	2.5526	LA	Fr
WU_10.2_9_18470034	9	18470034	0.322209	2.50295	LW	Fr
MARC0114913	9	23412144	2.5244	0.348444	LA	Leg
ASGA0087880	9	23866280	2.0962	0.297086	LA	Leg
ASGA0042081	9	24050317	2.3416	0.186184	LA	Leg
DRGA0009224	9	24108843	2.43998	0.111996	LA	Leg
ASGA0042087	9	24155728	2.69306	0.427108	LA	Leg
MARC0029280	9	24197043	2.3416	0.186184	LA	Leg
ALGA0112140	9	24332218	2.00254	0.772647	LA	Leg
ASGA0102528	9	24384122	2.64497	0.11827	LA	Leg
WU_10.2_9_24587942	9	24587942	0.867679	2.06166	LA	Fr
ASGA0085310	9	25477665	2.94249	0.343532	LW	Leg
ALGA0051950	9	26701434	1.21158	2.43055	LW	Fr
ASGA0103111	9	27257539	2.23031	0.155204	LW	Leg
MARC0046575	9	27497398	0.0138847	3.07252	LW	Fr
ALGA0052075	9	29646035	2.04166	0.901621	LA	Leg
WU_10.2_9_29704527	9	29704527	2.45991	1.12774	LA	Leg
SIRI0001302	9	30445561	0.5753	2.21779	LW	Fr
MARC0083961	9	30447236	2.69227	0.505977	LA	Leg
ALGA0107934	9	31118577	2.02072	0.547819	LA	Leg
ALGA0116670	9	31186538	2.50936	1.49253	LW	Leg
WU_10.2_9_35228926	9	35228926	0.610751	2.13132	LW	Fr
ALGA0052334	9	36148167	0.0941798	2.53749	LW	Fr
DIAS0003034	9	37038372	0.831462	2.62048	LW	Fr
ALGA0106351	9	43064592	3.29308	1.10345	LW	Leg
ALGA0052438	9	43386414	2.81143	0.638077	LW	Leg
ASGA0042620	9	45151209	2.2222	0.66809	LA	Leg
ASGA0042652	9	45472132	2.98137	1.13538	LW	Leg
MARC0014704	9	45577347	2.22445	0.163667	LW	Leg
ASGA0042735	9	47254539	0.175923	2.06048	LW	Fr
ASGA0042867	9	48726175	2.0962	0.178732	LA	Leg
M1GA0013009	9	52863203	0.207874	2.72875	LW	Fr
H3GA0027363	9	55038174	0.647742	2.09204	LW	Fr
ASGA0043130	9	56530748	2.18129	0.540319	LW	Leg
WU_10.2_9_59894586	9	59894586	2.36982	0.0668455	LW	Leg
MARC0012178	9	68634947	2.07322	0.101519	LW	Leg
WU_10.2_9_69084267	9	69084267	0.314872	2.22781	LW	Fr
WU_10.2_9_71515260	9	71515260	2.05697	0.858547	LW	Leg
WU_10.2_9_72809428	9	72809428	0.555354	2.04605	LW	Fr
ALGA0056130	9	73743623	0.427706	3.08404	LW	Fr
DRGA0009470	9	79422971	0.399929	2.7878	LW	Fr
ALGA0053856	9	82521341	0.10436	3.02417	LW	Fr
ALGA0112001	9	87393333	0.59583	2.26739	LW	Fr
WU_10.2_9_89432846	9	89432846	2.11189	0.600158	LW	Leg
ALGA0054078	9	93125776	0.173603	2.51089	LW	Fr
WU_10.2_9_96116464	9	96116464	2.39362	0.496471	LW	Leg
MARC0074409	9	99185170	2.38391	0.308954	LW	Leg
ASGA0082445	9	99893729	2.94327	0.087592	LW	Leg
WU_10.2_9_109593022	9	109593022	0.3902	2.02176	LW	Fr
ALGA0054784	9	128025650	2.07105	0.393528	LW	Leg
ALGA0055029	9	134004914	0.615806	3.7258	LW	Fr
ALGA0055091	9	135423002	2.15657	0.108356	LW	Leg
WU_10.2_9_136358148	9	136358148	4.85668	0.569614	LW	Leg
WU_10.2_9_138845760	9	138845760	1.04832	2.19492	LW	Fr
WU_10.2_9_140568701	9	140568701	0.0721703	2.09646	LW	Fr
WU_10.2_9_140769728	9	140769728	2.52442	0.349947	LW	Leg
WU_10.2_9_142508522	9	142508522	0.0149305	2.35875	LW	Fr
WU_10.2_9_142567587	9	142567587	0.498793	2.07033	LW	Fr
ALGA0109598	9	143883498	0.954755	2.02483	LW	Fr
WU_10.2_9_144890084	9	144890084	2.33306	0.398819	LW	Leg
WU_10.2_9_146301683	9	146301683	2.4192	0.724478	LA	Leg
WU_10.2_9_146334870	9	146334870	2.4192	0.724478	LA	Leg
WU_10.2_9_146667042	9	146667042	2.24128	0.253184	LA	Leg
MARC0108106	9	148943425	2.21931	0.21478	LW	Leg
ALGA0055940	9	151103349	2.8465	0.98125	LW	Leg
WU_10.2_10_324210	10	324210	0.415158	2.10212	LW	Fr
WU_10.2_10_1548070	10	1548070	0.26782	2.78443	LW	Fr
ALGA0056494	10	5471679	2.59039	0.00702303	LA	Leg
WU_10.2_10_5732339	10	5732339	2.68808	0.2503	LW	Leg
WU_10.2_10_7395243	10	7395243	2.45742	0.0590767	LW	Leg
ALGA0056614	10	7431397	0.273343	2.35623	LW	Fr
ASGA0095598	10	8362152	0.192554	2.37539	LW	Fr
H3GA0029174	10	11621974	0.71628	2.29912	LW	Fr
ASGA0046547	10	13589557	0.0353878	2.18259	LW	Fr
WU_10.2_10_15175943	10	15175943	2.04068	0.895983	LW	Leg
WU_10.2_10_17282890	10	17282890	2.63344	0.491175	LW	Leg
10_20166080	10	20166080	2.57212	0.108647	LA	Leg
ALGA0112074	10	20837178	3.41605	0.142123	LA	Leg
WU_10.2_10_20981313	10	20981313	2.40373	1.30263	LW	Leg
DRGA0017523	10	21029627	2.14163	0.235899	LA	Leg
ALGA0057627	10	21193675	2.32909	0.657727	LA	Leg
WU_10.2_10_22034045	10	22034045	2.69928	0.0770185	LA	Leg
WU_10.2_10_23896067	10	23896067	2.20854	0.0541741	LW	Leg
WU_10.2_10_24859705	10	24859705	2.37259	0.875172	LW	Leg
WU_10.2_10_25137727	10	25137727	2.0382	0.083152	LA	Leg
WU_10.2_10_25169206	10	25169206	2.22388	0.184949	LA	Leg
WU_10.2_10_25700959	10	25700959	2.08658	0.725459	LA	Leg
WU_10.2_10_25768437	10	25768437	2.79079	0.0536355	LA	Leg
WU_10.2_10_25930209	10	25930209	3.39825	0.573443	LA	Leg
WU_10.2_10_25946397	10	25946397	3.2411	0.20173	LA	Leg
ALGA0057823	10	26182475	2.32818	0.152981	LA	Leg
WU_10.2_10_26933674	10	26933674	0.31842	2.52134	LW	Fr
ALGA0119962	10	27376440	0.689644	2.01646	LW	Fr
WU_10.2_10_27726571	10	27726571	2.12522	0.0811402	LW	Leg
WU_10.2_10_27885521	10	27885521	2.32879	0.11461	LA	Leg
WU_10.2_10_28155855	10	28155855	2.2263	0.175525	LA	Leg
WU_10.2_10_28315634	10	28315634	2.04334	0.050025	LA	Leg
WU_10.2_10_28622339	10	28622339	2.34992	0.367534	LA	Leg
ASGA0047222	10	30140466	0.410407	2.13705	LW	Fr
ALGA0058073	10	32589926	0.171872	2.55738	LW	Fr
WU_10.2_10_41866712	10	41866712	2.00708	0.159763	LA	Leg
DRGA0010456	10	41903574	0.0025012	2.05564	LW	Fr
H3GA0029961	10	42115389	2.45791	0.606432	LW	Leg
ALGA0105339	10	42612519	0.510804	3.12713	LW	Fr
WU_10.2_10_43177035	10	43177035	2.20818	0.187709	LA	Leg
ALGA0058520	10	43574969	2.0859	0.530351	LW	Leg
WU_10.2_10_43831982	10	43831982	2.05981	0.0341061	LA	Leg
WU_10.2_10_43938002	10	43938002	2.05981	0.0341061	LA	Leg
WU_10.2_10_43960760	10	43960760	2.05981	0.0341061	LA	Leg
WU_10.2_10_44189154	10	44189154	2.59122	0.17494	LW	Leg
WU_10.2_10_44498792	10	44498792	0.155873	2.27931	LW	Fr
ASGA0096596	10	44792079	1.26236	2.04122	LA	Fr
WU_10.2_10_44896081	10	44896081	2.16087	2.08928	LA	Leg
WU_10.2_10_44896081	10	44896081	2.16087	2.08928	LA	Fr
WU_10.2_10_45953638	10	45953638	2.93787	0.735882	LW	Leg
ASGA0047761	10	46084707	0.206251	3.87538	LW	Fr
WU_10.2_10_46790123	10	46790123	2.84312	0.251224	LW	Leg
MARC0054233	10	48468398	2.23627	0.899834	LA	Leg
ASGA0047892	10	48480474	2.42937	0.438803	LW	Leg
ASGA0047927	10	48926188	2.13698	0.332097	LA	Leg
ALGA0059049	10	52043114	2.15585	1.09679	LW	Leg
WU_10.2_10_52897186	10	52897186	0.587822	2.50885	LW	Fr
ASGA0082793	10	53037792	2.13792	0.700658	LA	Leg
ASGA0092634	10	53049277	2.13792	0.700658	LA	Leg
WU_10.2_10_53806841	10	53806841	2.24454	0.46287	LW	Leg
ALGA0059163	10	54458532	0.143015	2.84768	LW	Fr
ASGA0048247	10	56024865	0.0178499	2.32505	LA	Fr
WU_10.2_10_56066975	10	56066975	0.0178499	2.32505	LA	Fr
ASGA0048254	10	56094248	0.532689	2.34553	LA	Fr
ALGA0059229	10	56136413	0.132194	2.59291	LA	Fr
WU_10.2_10_56665358	10	56665358	2.25936	0.296932	LW	Leg
ASGA0048294	10	57967019	0.554878	2.01777	LA	Fr
ASGA0048299	10	58040881	0.554878	2.01777	LA	Fr
WU_10.2_10_58287937	10	58287937	2.65333	0.477783	LW	Leg
H3GA0056397	10	59266739	0.72218	2.53891	LA	Fr
ASGA0094869	10	59465999	0.262339	2.62708	LW	Fr
ALGA0108163	10	59704890	0.818108	2.16398	LA	Fr
ASGA0096975	10	59954227	0.429345	2.0505	LA	Fr
WU_10.2_10_60646505	10	60646505	0.237145	2.65763	LW	Fr
ALGA0059581	10	63786834	0.844271	2.41958	LA	Fr
H3GA0030503	10	64080456	1.69687	2.69682	LW	Fr
WU_10.2_10_64348824	10	64348824	0.18058	2.02537	LW	Fr
ALGA0059679	10	65122025	0.0929568	2.46946	LW	Fr
WU_10.2_10_65833767	10	65833767	2.40808	0.08663	LW	Leg
WU_10.2_10_65865601	10	65865601	2.23321	0.246268	LW	Leg
WU_10.2_10_67604202	10	67604202	2.0793	0.869276	LW	Leg
MARC0082829	10	67781592	2.47469	0.172633	LW	Leg
WU_10.2_10_68483334	10	68483334	2.00983	1.17762	LW	Leg
WU_10.2_10_71510454	10	71510454	0.272508	2.25627	LW	Fr
WU_10.2_10_72161660	10	72161660	0.0344149	2.25679	LA	Fr
WU_10.2_10_73288716	10	73288716	0.465949	2.07386	LW	Fr
WU_10.2_10_74772710	10	74772710	0.183357	2.33131	LW	Fr
WU_10.2_10_76058695	10	76058695	0.315358	2.07116	LW	Fr
WU_10.2_10_78480805	10	78480805	0.235748	2.01632	LW	Fr
MARC0066431	11	208006	2.57044	0.139014	LW	Leg
ASGA0049184	11	1339911	0.588086	2.5638	LW	Fr
ASGA0049287	11	2942858	0.240671	2.01624	LW	Fr
WU_10.2_11_5698241	11	5698241	1.176	2.6213	LW	Fr
ALGA0060524	11	5890295	2.1833	0.392758	LW	Leg
WU_10.2_11_12794625	11	12794625	1.32689	2.02112	LW	Fr
ALGA0061249	11	20567616	2.66837	0.130237	LW	Leg
ASGA0050339	11	23991998	2.00511	1.59066	LW	Leg
ASGA0050363	11	24196781	0.517544	2.03825	LW	Fr
WU_10.2_11_24256265	11	24256265	0.756304	2.75291	LW	Fr
WU_10.2_11_24870075	11	24870075	0.820268	2.29784	LW	Fr
ALGA0061859	11	34856772	2.16921	0.22298	LW	Leg
ALGA0061896	11	37109307	0.0743882	2.75442	LW	Fr
DRGA0011138	11	40962201	0.604474	2.34172	LW	Fr
ASGA0050674	11	41820246	0.277602	2.83729	LW	Fr
ASGA0050814	11	51401700	2.13239	0.359544	LW	Leg
ALGA0062242	11	52110040	0.704669	2.04833	LA	Fr
WU_10.2_11_52137510	11	52137510	0.637319	2.216	LA	Fr
ALGA0062274	11	53000238	3.01947	0.569417	LW	Leg
WU_10.2_11_56090397	11	56090397	2.92462	0.0944616	LW	Leg
ALGA0062394	11	56769207	0.954419	2.66721	LA	Fr
ALGA0062412	11	57096432	0.352913	2.89811	LA	Fr
ALGA0062415	11	57250306	0.0956023	2.72803	LA	Fr
ALGA0062426	11	57745197	0.206958	2.51197	LA	Fr
ALGA0062438	11	57969043	0.206958	2.51197	LA	Fr
DRGA0011320	11	57992782	0.124537	2.03671	LA	Fr
INRA0036652	11	58007243	0.206958	2.51197	LA	Fr
ASGA0050962	11	58531317	0.277975	2.81132	LA	Fr
ALGA0062448	11	58577740	0.277975	2.81132	LA	Fr
DRGA0011335	11	60629087	1.16002	2.38308	LW	Fr
ALGA0062534	11	62443488	0.0352578	2.10671	LA	Fr
INRA0036775	11	63804815	0.119778	2.2711	LA	Fr
WU_10.2_11_64952679	11	64952679	2.54916	1.13616	LW	Leg
ALGA0062684	11	66265248	2.3017	0.283024	LW	Leg
MARC0095559	11	66316277	2.06986	0.053261	LW	Leg
H3GA0032062	11	66563380	0.754189	2.60431	LA	Fr
H3GA0032077	11	66737088	0.184696	2.14203	LA	Fr
WU_10.2_11_67588757	11	67588757	0.0910403	2.02694	LW	Fr
ASGA0051242	11	69419225	3.19286	0.328219	LW	Leg
ASGA0051247	11	69516910	0.0791947	2.12054	LA	Fr
ASGA0051274	11	70044668	0.113917	2.34383	LA	Fr
DRGA0017692	11	70155155	0.307718	2.07888	LA	Fr
ASGA0098331	11	70295503	0.0616772	2.14446	LA	Fr
WU_10.2_11_70943262	11	70943262	0.122713	2.14227	LA	Fr
ASGA0051412	11	71993140	2.0195	0.318685	LW	Leg
ASGA0051420	11	72053130	0.273314	2.48913	LA	Fr
WU_10.2_11_72152642	11	72152642	0.131676	2.04434	LA	Fr
ALGA0063183	11	72166620	0.131676	2.04434	LA	Fr
WU_10.2_11_72209198	11	72209198	0.131676	2.04434	LA	Fr
ALGA0103037	11	72286336	0.131676	2.04434	LA	Fr
WU_10.2_11_72307560	11	72307560	0.131676	2.04434	LA	Fr
ALGA0063203	11	72341000	0.131676	2.04434	LA	Fr
ALGA0063246	11	72485442	0.204743	2.21381	LA	Fr
ALGA0063219	11	72525988	2.83401	0.115735	LW	Leg
ALGA0063219	11	72525988	0.173445	2.59601	LA	Fr
WU_10.2_11_74879169	11	74879169	2.41765	0.154762	LA	Leg
ASGA0051626	11	75009361	2.77007	0.192722	LA	Leg
WU_10.2_11_75048584	11	75048584	2.3312	0.970749	LA	Leg
ALGA0063555	11	77558244	0.0227341	2.42272	LW	Fr
ASGA0088514	11	78672986	2.19412	0.446211	LA	Leg
MARC0017453	11	79503011	2.06406	0.609824	LA	Leg
WU_10.2_11_79711527	11	79711527	3.47995	0.50602	LW	Leg
WU_10.2_11_80933688	11	80933688	2.10311	0.10379	LW	Leg
ALGA0063891	11	81408662	0.12112	2.10141	LW	Fr
ASGA0099981	11	82676375	1.10698	2.04367	LW	Fr
WU_10.2_11_83286917	11	83286917	0.000355086	2.84484	LW	Fr
ASGA0052404	11	85700644	2.73573	0.0900276	LW	Leg
MARC0058097	11	86552038	0.255455	2.16398	LW	Fr
WU_10.2_12_1349252	12	1349252	0.0877786	2.30002	LW	Fr
WU_10.2_12_1541669	12	1541669	0.0632544	4.15513	LW	Fr
MARC0063090	12	1779278	0.0639245	2.22433	LA	Fr
ASGA0052467	12	1888177	0.0639245	2.22433	LA	Fr
WU_10.2_12_2744826	12	2744826	0.0878755	2.32454	LA	Fr
WU_10.2_12_2806986	12	2806986	0.0878755	2.32454	LA	Fr
ALGA0064361	12	2830023	0.276422	2.25075	LA	Fr
WU_10.2_12_2865907	12	2865907	0.0878755	2.32454	LA	Fr
ALGA0064359	12	2879332	0.0878755	2.32454	LA	Fr
WU_10.2_12_2976446	12	2976446	0.0878755	2.32454	LA	Fr
ASGA0088990	12	2979580	0.0878755	2.32454	LA	Fr
WU_10.2_12_3079587	12	3079587	0.0878755	2.32454	LA	Fr
WU_10.2_12_3139862	12	3139862	0.0878755	2.32454	LA	Fr
WU_10.2_12_3211882	12	3211882	0.0878755	2.32454	LA	Fr
ASGA0085853	12	3323877	2.42192	0.133567	LW	Leg
H3GA0056696	12	4396633	2.10968	0.343786	LW	Leg
ASGA0052596	12	5291818	2.14374	1.32089	LW	Leg
M1GA0026919	12	7675780	2.154	0.218892	LW	Leg
DIAS0001123	12	7846141	2.72647	0.368989	LW	Leg
ASGA0098350	12	8826005	1.10161	2.28509	LW	Fr
DRGA0011583	12	9902182	0.0328784	2.68062	LW	Fr
WU_10.2_12_11448231	12	11448231	0.376125	2.42657	LW	Fr
SIRI0000812	12	12304916	2.12181	0.613941	LW	Leg
WU_10.2_12_12618812	12	12618812	0.0157697	2.06935	LA	Fr
ASGA0101513	12	12671424	0.0157697	2.06935	LA	Fr
MARC0093870	12	13750709	0.279037	2.77429	LW	Fr
WU_10.2_12_14105110	12	14105110	0.705218	2.40627	LW	Fr
ASGA0053505	12	16784171	0.571812	2.29731	LW	Fr
ASGA0053516	12	17364341	0.049361	2.06678	LW	Fr
ALGA0065428	12	17750160	0.0652515	2.04309	LW	Fr
WU_10.2_12_19310961	12	19310961	0.160568	2.47396	LW	Fr
WU_10.2_12_21136721	12	21136721	0.574251	3.05507	LW	Fr
WU_10.2_12_22075118	12	22075118	2.68779	0.486997	LW	Leg
WU_10.2_12_23844794	12	23844794	0.0806544	2.29031	LW	Fr
ALGA0065635	12	23980324	0.0959387	3.25972	LW	Fr
ASGA0053908	12	26872372	0.0171761	2.05354	LA	Fr
ALGA0118014	12	27671259	2.00555	0.0155342	LW	Leg
ALGA0065830	12	28426018	0.450398	2.05002	LW	Fr
ALGA0065876	12	31175338	2.2301	2.87097	LW	Leg
ALGA0065876	12	31175338	2.2301	2.87097	LW	Fr
ASGA0053974	12	31447563	2.60933	0.857438	LW	Leg
M1GA0016615	12	34715835	0.135556	2.28555	LA	Fr
ASGA0054284	12	34767420	0.135556	2.28555	LA	Fr
MARC0026738	12	34916433	0.187041	2.09016	LA	Fr
DBWU0000835	12	34947428	0.135556	2.28555	LA	Fr
WU_10.2_12_41685027	12	41685027	2.53604	0.141348	LW	Leg
ASGA0090653	12	42945563	2.06924	0.070512	LW	Leg
WU_10.2_12_43046312	12	43046312	0.409904	2.35167	LW	Fr
ALGA0112442	12	48336557	2.30887	0.109041	LW	Leg
WU_10.2_12_49269832	12	49269832	0.790393	2.18637	LW	Fr
ASGA0054868	12	49919795	2.02801	0.433204	LA	Leg
WU_10.2_12_49979240	12	49979240	2.02801	0.433204	LA	Leg
ALGA0066858	12	51190108	2.37724	0.190642	LW	Leg
ALGA0066854	12	51261422	3.18368	0.547346	LA	Leg
DRGA0011803	12	51300469	3.18368	0.547346	LA	Leg
WU_10.2_12_51365490	12	51365490	2.81149	0.0868137	LA	Leg
ASGA0054989	12	51375066	2.18572	0.252766	LA	Leg
WU_10.2_12_51414289	12	51414289	2.4352	0.566439	LA	Leg
ASGA0099044	12	51581265	2.00369	0.709283	LA	Leg
ALGA0111196	12	51584975	2.07479	0.461399	LA	Leg
H3GA0055908	12	51604624	2.71604	0.217926	LA	Leg
WU_10.2_12_51752425	12	51752425	0.927528	2.03508	LW	Fr
WU_10.2_12_51790398	12	51790398	4.0528	0.287235	LW	Leg
WU_10.2_12_52364981	12	52364981	2.16461	0.0316715	LA	Leg
WU_10.2_12_52449935	12	52449935	2.06949	0.42302	LA	Leg
DIAS0003012	12	52589923	2.12702	0.242206	LW	Leg
WU_10.2_12_52975483	12	52975483	0.328057	2.18568	LW	Fr
WU_10.2_12_56680018	12	56680018	2.64729	0.0619692	LW	Leg
WU_10.2_12_58006745	12	58006745	0.431872	2.40534	LW	Fr
ASGA0055345	12	60642793	0.541999	3.10327	LW	Fr
ALGA0103023	12	60982548	2.5035	0.0146776	LW	Leg
ALGA0067282	12	62421422	0.527721	2.18212	LW	Fr
ASGA0093756	12	62949448	2.02664	0.39585	LW	Leg
MARC0018128	13	714445	0.0717745	3.2392	LW	Fr
WU_10.2_13_7160442	13	7160442	2.16916	0.315446	LA	Leg
ALGA0067709	13	7175532	2.16916	0.315446	LA	Leg
H3GA0035309	13	7255451	2.24121	0.305618	LA	Leg
WU_10.2_13_7359785	13	7359785	2.27606	0.347831	LA	Leg
WU_10.2_13_7578704	13	7578704	2.1642	0.773034	LW	Leg
ASGA0092961	13	7907123	0.668647	2.94833	LW	Fr
WU_10.2_13_10637564	13	10637564	3.58924	0.503122	LW	Leg
WU_10.2_13_11278552	13	11278552	2.43018	0.242007	LW	Leg
WU_10.2_13_11351043	13	11351043	0.285214	2.01488	LA	Fr
ALGA0067913	13	11367753	2.59619	0.114031	LW	Leg
ALGA0067953	13	11652905	2.09031	0.0317294	LW	Leg
WU_10.2_13_11806241	13	11806241	0.418957	2.00937	LA	Fr
WU_10.2_13_11975824	13	11975824	2.62219	0.11697	LW	Leg
WU_10.2_13_13250348	13	13250348	0.280048	2.05843	LW	Fr
ALGA0110721	13	13965439	0.226575	2.06118	LW	Fr
WU_10.2_13_15017052	13	15017052	2.59943	0.179108	LW	Leg
ASGA0056234	13	15285673	0.972364	2.09512	LW	Fr
ALGA0068441	13	17177646	0.296067	2.69696	LW	Fr
WU_10.2_13_18410694	13	18410694	2.10445	0.420198	LW	Leg
DIAS0002174	13	19774122	2.16986	0.345953	LW	Leg
ASGA0056617	13	22823192	2.49609	0.309139	LW	Leg
ALGA0068836	13	25244249	2.05241	1.18825	LW	Leg
WU_10.2_13_26693502	13	26693502	2.21726	0.302328	LW	Leg
ASGA0100164	13	28531463	2.34468	0.69313	LW	Leg
ASGA0056898	13	29081639	2.04256	0.0598848	LW	Leg
DIAS0001109	13	33528473	2.44342	0.422486	LW	Leg
H3GA0036138	13	34922293	0.527902	2.01561	LW	Fr
MARC0085722	13	42207519	3.24703	0.0921342	LW	Leg
ASGA0057342	13	42925504	2.29457	0.0695016	LW	Leg
ALGA0119867	13	44513358	2.69575	1.14299	LW	Leg
ALGA0069827	13	45877793	2.34216	0.370295	LW	Leg
ASGA0090392	13	46607148	2.14109	0.317023	LW	Leg
ALGA0069923	13	49125486	2.00645	0.187955	LW	Leg
MARC0031178	13	52318605	0.00310279	2.1386	LW	Fr
MARC0115474	13	54283760	0.44926	2.48919	LW	Fr
ALGA0070071	13	55314132	1.00181	2.75433	LW	Fr
ALGA0070080	13	55435615	2.82837	0.358231	LW	Leg
INRA0040190	13	56170062	2.54503	0.538793	LW	Leg
ASGA0057575	13	56319843	3.9097	0.121505	LW	Leg
WU_10.2_13_57149286	13	57149286	2.70128	0.663667	LW	Leg
ASGA0057936	13	71661735	2.07915	0.774527	LW	Leg
H3GA0055439	13	74216361	3.09224	0.0680487	LW	Leg
SIRI0000901	13	74679000	0.0879999	2.21825	LW	Fr
M1GA0025421	13	80585007	0.0899941	2.15969	LW	Fr
ALGA0105535	13	102458997	0.0911417	2.64755	LW	Fr
MARC0067536	13	103855385	2.55742	0.199403	LW	Leg
WU_10.2_13_106130701	13	106130701	3.00836	0.057602	LA	Leg
SIRI0000358	13	106430757	2.3396	0.0238043	LA	Leg
ASGA0103643	13	106808982	2.06817	0.0990585	LA	Leg
MARC0085160	13	107038515	2.3396	0.0238043	LA	Leg
MARC0087498	13	107057558	2.3396	0.0238043	LA	Leg
ASGA0058621	13	107131634	2.27671	0.116876	LA	Leg
MARC0051617	13	107191595	2.27671	0.116876	LA	Leg
MARC0025749	13	107558646	2.27671	0.116876	LA	Leg
ASGA0097619	13	107869234	2.27671	0.116876	LA	Leg
MARC0091522	13	107893345	2.27671	0.116876	LA	Leg
ASGA0092770	13	107935652	2.27671	0.116876	LA	Leg
MARC0021524	13	107980182	2.88234	0.15743	LA	Leg
MARC0011995	13	108070956	2.27671	0.116876	LA	Leg
DIAS0002671	13	109172356	2.27671	0.116876	LA	Leg
ASGA0058651	13	110572381	2.27671	0.116876	LA	Leg
MARC0107572	13	110594180	2.27671	0.116876	LA	Leg
ALGA0071626	13	112158346	2.08658	0.382627	LA	Leg
M1GA0017635	13	112289067	2.08658	0.382627	LA	Leg
ALGA0071636	13	112541289	2.88234	0.15743	LA	Leg
ASGA0058659	13	112612249	2.27671	0.116876	LA	Leg
INRA0040812	13	112651969	2.27671	0.116876	LA	Leg
DIAS0001144	13	112745088	2.08658	0.382627	LA	Leg
ALGA0071651	13	114585565	2.13701	0.0563504	LA	Leg
ALGA0071654	13	114792905	2.13701	0.0563504	LA	Leg
INRA0040820	13	114884492	2.13701	0.0563504	LA	Leg
H3GA0037164	13	114928166	2.13701	0.0563504	LA	Leg
ASGA0058664	13	115027431	2.38672	0.143842	LA	Leg
ALGA0071673	13	116513757	2.63701	0.354464	LW	Leg
DIAS0003223	13	117172023	2.38568	0.0167947	LA	Leg
MARC0110613	13	117228983	2.38568	0.0167947	LA	Leg
MARC0000450	13	117732619	2.45154	0.0408172	LA	Leg
MARC0014214	13	118012606	2.20818	0.0385124	LA	Leg
ASGA0058709	13	124255890	2.01104	0.774146	LW	Leg
ASGA0058711	13	124731517	2.13084	0.100238	LW	Leg
ALGA0071815	13	127172632	2.3147	0.117503	LA	Leg
ALGA0071822	13	127657664	2.3147	0.117503	LA	Leg
MARC0037938	13	131340790	2.3719	0.124887	LA	Leg
ASGA0058767	13	132910812	2.63867	0.416408	LW	Leg
WU_10.2_13_136520044	13	136520044	2.55074	0.315727	LA	Leg
WU_10.2_13_139313545	13	139313545	0.175416	3.10505	LW	Fr
WU_10.2_13_140537219	13	140537219	1.03628	2.09303	LW	Fr
MARC0030673	13	140688388	0.435547	2.53943	LW	Fr
ALGA0072062	13	143866440	0.637957	2.08329	LW	Fr
ALGA0107333	13	147060010	0.0921236	2.40185	LW	Fr
ASGA0059126	13	158857963	0.214811	2.32568	LW	Fr
ASGA0059157	13	160357550	2.05651	0.432091	LW	Leg
ALGA0072511	13	162025777	0.191571	2.54483	LW	Fr
WU_10.2_13_162302219	13	162302219	2.02335	0.0327174	LW	Leg
ALGA0072662	13	170634721	2.15537	0.00890635	LW	Leg
ALGA0072878	13	185067136	2.00541	0.13227	LA	Leg
WU_10.2_13_186302899	13	186302899	0.00359321	2.30848	LW	Fr
ASGA0059405	13	188270875	2.08797	0.870348	LW	Leg
ALGA0116167	13	188980328	2.67675	1.6888	LW	Leg
WU_10.2_13_189191752	13	189191752	1.00164	2.74979	LW	Fr
ALGA0073059	13	189393783	3.11639	0.0888265	LW	Leg
WU_10.2_13_192504223	13	192504223	0.123583	2.37232	LW	Fr
ALGA0073223	13	192845387	2.31997	1.07593	LW	Leg
ASGA0101025	13	194696714	2.33355	0.125824	LW	Leg
MARC0060287	13	201035915	0.204013	2.98174	LW	Fr
WU_10.2_13_201101147	13	201101147	0.0144668	2.05626	LW	Fr
WU_10.2_13_205192332	13	205192332	0.265234	2.67216	LW	Fr
ASGA0090854	13	206924504	0.439568	2.89801	LW	Fr
WU_10.2_13_206995982	13	206995982	3.0257	0.897347	LW	Leg
ASGA0059896	13	207828898	0.731797	2.13892	LA	Fr
WU_10.2_13_207909965	13	207909965	0.200328	2.13838	LW	Fr
ASGA0059903	13	208034723	0.480901	2.941	LA	Fr
WU_10.2_13_208633448	13	208633448	0.387201	2.17652	LA	Fr
WU_10.2_13_209854481	13	209854481	2.26198	0.0203378	LA	Leg
INRA0041627	13	210791845	2.23101	0.207802	LW	Leg
ALGA0073896	13	211907795	2.18854	0.120297	LW	Leg
ALGA0113058	13	212079025	0.63458	2.12596	LW	Fr
ASGA0060114	13	212626191	3.02186	0.847638	LW	Leg
WU_10.2_13_212992105	13	212992105	2.07478	0.273853	LA	Leg
ASGA0098605	13	213588138	1.20338	2.44758	LW	Fr
ALGA0074008	13	214911346	2.89742	0.657904	LA	Leg
WU_10.2_13_214952613	13	214952613	2.08686	0.503159	LA	Leg
WU_10.2_13_216912741	13	216912741	0.204181	6.01603	LW	Fr
WU_10.2_14_1414230	14	1414230	2.12746	0.343598	LA	Leg
WU_10.2_14_4968099	14	4968099	0.626024	2.85281	LW	Fr
WU_10.2_14_6103435	14	6103435	1.31723	2.26558	LW	Fr
WU_10.2_14_6352544	14	6352544	2.3062	0.235511	LW	Leg
M1GA0018105	14	6529806	2.01284	0.546227	LW	Leg
ASGA0060787	14	6623195	0.0503227	2.96193	LW	Fr
WU_10.2_14_7102654	14	7102654	2.02854	0.245268	LW	Leg
WU_10.2_14_7373767	14	7373767	0.0551631	2.00302	LW	Fr
WU_10.2_14_7626194	14	7626194	0.0957648	2.00303	LW	Fr
WU_10.2_14_10232957	14	10232957	0.633645	2.24227	LW	Fr
H3GA0038804	14	10802507	2.70525	0.933048	LA	Leg
ALGA0075052	14	10828099	3.06262	1.03461	LA	Leg
ALGA0075208	14	11889885	0.0316261	2.31698	LW	Fr
M1GA0025027	14	12577892	0.997341	2.77728	LW	Fr
WU_10.2_14_13134700	14	13134700	2.11583	1.57801	LA	Leg
DRGA0013588	14	13214828	0.318857	2.26867	LA	Fr
ASGA0061498	14	13641186	2.04091	1.11541	LA	Leg
ALGA0075462	14	13733689	0.415608	2.1766	LA	Fr
ALGA0075476	14	14032461	2.09398	1.59968	LA	Leg
ASGA0061551	14	14286931	2.58188	0.394397	LW	Leg
ALGA0075539	14	14633432	1.39966	2.49536	LW	Fr
WU_10.2_14_15407795	14	15407795	0.0927919	2.02952	LW	Fr
WU_10.2_14_21418203	14	21418203	0.678527	2.22982	LA	Fr
WU_10.2_14_21513092	14	21513092	0.678527	2.22982	LA	Fr
WU_10.2_14_21778662	14	21778662	0.539898	2.17188	LA	Fr
WU_10.2_14_22910380	14	22910380	0.351944	2.23156	LW	Fr
ASGA0062133	14	25077228	0.136956	2.18252	LA	Fr
WU_10.2_14_27774102	14	27774102	2.41326	0.548309	LW	Leg
ALGA0076614	14	29867186	2.63687	0.0883907	LW	Leg
H3GA0039661	14	32802674	2.55361	0.966705	LW	Leg
ASGA0062569	14	34229866	0.0381421	2.19927	LW	Fr
ASGA0062614	14	35155126	0.745361	2.54165	LW	Fr
ASGA0062667	14	36900895	0.72661	2.04632	LW	Fr
ASGA0062686	14	37168552	2.02395	1.04004	LW	Leg
H3GA0039777	14	37645305	2.75213	0.0021642	LW	Leg
MARC0073149	14	39143002	0.573905	2.03866	LA	Fr
WU_10.2_14_39399038	14	39399038	0.459082	2.21296	LA	Fr
MARC0022467	14	40032202	0.52423	2.50653	LA	Fr
ASGA0062932	14	43257736	0.0905564	2.80239	LA	Fr
MARC0098738	14	43443637	2.54684	0.248965	LW	Leg
H3GA0039917	14	43804320	0.0905564	2.80239	LA	Fr
MARC0023222	14	44118459	0.0905564	2.80239	LA	Fr
H3GA0039956	14	44386099	0.0905564	2.80239	LA	Fr
MARC0094155	14	44652281	0.0905564	2.80239	LA	Fr
H3GA0039998	14	45718453	0.214624	2.48372	LA	Fr
ALGA0077232	14	45850137	1.47121	2.07221	LW	Fr
MARC0058238	14	46313456	2.34436	0.375004	LW	Leg
H3GA0040014	14	46325913	2.75983	0.14024	LW	Leg
H3GA0040076	14	48973279	1.51922	2.05965	LW	Fr
INRA0043964	14	49383214	0.450614	2.03375	LW	Fr
ALGA0077416	14	50056408	2.11851	0.0215845	LW	Leg
ASGA0063279	14	51020901	0.728543	2.43118	LW	Fr
ALGA0077469	14	51195960	0.00754882	2.12313	LA	Fr
DRGA0013821	14	51464087	0.00754882	2.12313	LA	Fr
ALGA0077471	14	51547355	0.00754882	2.12313	LA	Fr
M1GA0018646	14	52573859	0.0464954	2.43231	LA	Fr
M1GA0018651	14	52903091	0.00754882	2.12313	LA	Fr
DIAS0004714	14	52994112	0.756077	2.20354	LA	Fr
ALGA0077567	14	53100973	0.756077	2.20354	LA	Fr
ALGA0077578	14	53208533	0.756077	2.20354	LA	Fr
H3GA0040214	14	54065492	2.49808	1.78146	LW	Leg
DRGA0013850	14	58074274	0.51074	2.10458	LW	Fr
M1GA0018737	14	63432487	0.607047	2.01681	LW	Fr
MARC0097527	14	66239887	2.16585	0.396096	LW	Leg
MARC0014474	14	73202166	0.689664	2.94486	LW	Fr
ALGA0078699	14	76584181	0.400782	2.44582	LW	Fr
WU_10.2_14_80788429	14	80788429	0.172599	2.78874	LW	Fr
H3GA0041277	14	93791750	0.231031	2.37702	LW	Fr
DRGA0014234	14	96445285	0.571806	2.39421	LW	Fr
MARC0058915	14	96480198	0.445253	2.34188	LW	Fr
ALGA0079878	14	98611312	2.05245	0.211243	LW	Leg
ALGA0080141	14	104872741	2.16849	0.782249	LW	Leg
MARC0001013	14	107602780	0.520884	2.74602	LW	Fr
ALGA0080414	14	109782472	0.578495	2.03125	LW	Fr
ALGA0080524	14	111426258	2.20019	0.108757	LW	Leg
ALGA0080534	14	111525664	0.676765	2.48405	LW	Fr
DRGA0014437	14	112992396	2.51704	0.609148	LA	Leg
DIAS0000128	14	113136615	3.27393	0.00274238	LW	Leg
MARC0071608	14	113308461	2.51704	0.609148	LA	Leg
ASGA0065778	14	113333663	2.08658	0.775067	LA	Leg
ASGA0065780	14	113376632	2.34399	0.285121	LA	Leg
ASGA0065790	14	113554994	2.34399	0.285121	LA	Leg
WU_10.2_14_114082052	14	114082052	2.34399	0.285121	LA	Leg
ALGA0080776	14	116383375	0.410433	2.31509	LW	Fr
H3GA0041961	14	118286592	2.03774	0.0571212	LW	Leg
ASGA0066165	14	122819384	0.363559	2.41345	LW	Fr
INRA0046767	14	123819555	0.163076	2.4985	LW	Fr
WU_10.2_14_131851616	14	131851616	4.16998	0.417925	LW	Leg
WU_10.2_14_133103701	14	133103701	0.732861	2.14633	LW	Fr
ALGA0081634	14	133547755	0.626474	2.47076	LW	Fr
DRGA0014668	14	137159990	0.350906	2.74865	LW	Fr
WU_10.2_14_137873771	14	137873771	2.05363	0.364208	LW	Leg
WU_10.2_14_139226857	14	139226857	0.616724	2.92433	LW	Fr
ALGA0082391	14	141662548	0.580097	2.13204	LW	Fr
WU_10.2_14_141763738	14	141763738	2.25416	0.0430147	LW	Leg
ASGA0067246	14	142848082	0.078823	2.1262	LW	Fr
DBWU0000067	14	144296755	0.486063	2.60853	LW	Fr
INRA0048155	14	145516500	2.1893	1.7369	LW	Leg
WU_10.2_14_146703754	14	146703754	0.0139833	2.06641	LW	Fr
WU_10.2_14_149158644	14	149158644	2.14723	0.251114	LA	Leg
M1GA0019802	14	150010047	0.294214	2.68888	LA	Fr
MARC0041532	14	150074467	2.33173	0.637961	LA	Leg
14_150608151	14	150608151	0.472868	2.96441	LA	Fr
ASGA0068088	14	150689793	0.668827	2.74142	LA	Fr
MARC0059646	14	151196419	0.52866	2.33221	LA	Fr
ALGA0105523	15	1163305	2.07439	0.611934	LW	Leg
ALGA0083422	15	3419325	0.166775	2.13975	LW	Fr
ALGA0083488	15	4890608	0.0867449	3.33842	LW	Fr
ALGA0083534	15	7424918	0.0434999	2.12225	LW	Fr
INRA0048712	15	7527462	0.143211	2.27655	LW	Fr
WU_10.2_15_14695439	15	14695439	2.21221	0.578588	LW	Leg
WU_10.2_15_20089317	15	20089317	0.392843	2.22086	LW	Fr
WU_10.2_15_20232039	15	20232039	0.677033	2.36115	LA	Fr
DRGA0015006	15	24649487	0.315599	2.0954	LW	Fr
WU_10.2_15_25747414	15	25747414	2.77176	0.164773	LW	Leg
WU_10.2_15_25845378	15	25845378	0.298943	2.43995	LA	Fr
MARC0113166	15	25853270	0.298943	2.43995	LA	Fr
ASGA0068971	15	25870118	0.298943	2.43995	LA	Fr
ALGA0084374	15	25947179	0.622173	2.53735	LA	Fr
WU_10.2_15_26007616	15	26007616	0.267057	2.29551	LA	Fr
WU_10.2_15_26110849	15	26110849	0.785665	2.07265	LA	Fr
CASI0009384	15	26156628	0.417325	3.11919	LA	Fr
WU_10.2_15_27671720	15	27671720	0.0849418	2.00563	LW	Fr
WU_10.2_15_28407766	15	28407766	0.174563	2.0253	LW	Fr
WU_10.2_15_28735984	15	28735984	0.0904565	2.78087	LW	Fr
ASGA0096466	15	29033970	2.02888	0.0975512	LW	Leg
ASGA0104518	15	29594994	0.0414559	2.22384	LW	Fr
H3GA0055575	15	29605590	2.33439	0.0198135	LW	Leg
ALGA0106062	15	29647184	2.30315	0.0675587	LW	Leg
15_31234625	15	31234625	1.25833	2.15453	LW	Fr
ALGA0084775	15	36177746	2.3566	0.0295988	LW	Leg
ASGA0069382	15	40780676	0.864866	3.20048	LW	Fr
ASGA0088476	15	42105101	1.12305	2.50319	LW	Fr
H3GA0044246	15	45575425	0.0267552	2.54881	LW	Fr
ALGA0085331	15	56149951	0.342324	2.5786	LA	Fr
M1GA0020296	15	56161595	0.248094	2.48841	LA	Fr
INRA0049351	15	57530002	2.21446	0.0835449	LW	Leg
MARC0039481	15	57611855	0.15249	2.09649	LA	Fr
ALGA0085398	15	57805024	0.0341453	3.47713	LA	Fr
MARC0044358	15	59124311	0.5598	3.43733	LW	Fr
ALGA0085441	15	59296906	0.00694651	2.13556	LA	Fr
ASGA0069644	15	59878862	3.47031	0.319676	LW	Leg
H3GA0044383	15	60147273	0.280464	2.73175	LA	Fr
MARC0071088	15	60236359	0.15249	2.46474	LA	Fr
ALGA0122705	15	60719311	0.691596	2.47444	LW	Fr
ALGA0085552	15	63383923	2.21466	0.56742	LW	Leg
ALGA0085877	15	84109275	0.694497	2.45985	LW	Fr
ALGA0085928	15	85332867	2.19219	0.383939	LW	Leg
ALGA0086015	15	87042257	0.0935303	2.16174	LW	Fr
ALGA0086095	15	89276340	0.217227	2.48366	LW	Fr
H3GA0044657	15	91003938	2.85089	0.77048	LW	Leg
H3GA0044702	15	94928090	0.00890112	2.13512	LW	Fr
H3GA0044704	15	95239799	1.05667	2.66331	LW	Fr
ASGA0070163	15	101778173	0.698382	3.63226	LW	Fr
ALGA0086405	15	103012674	0.274632	5.98928	LW	Fr
ALGA0104782	15	112258571	2.72714	0.0756133	LW	Leg
ASGA0070241	15	114183041	0.459127	2.09628	LW	Fr
WU_10.2_15_118997541	15	118997541	0.336047	2.27169	LW	Fr
H3GA0044814	15	119982356	2.1321	0.479426	LW	Leg
WU_10.2_15_123375451	15	123375451	0.18199	2.16241	LA	Fr
WU_10.2_15_125123246	15	125123246	0.0393578	2.00929	LW	Fr
H3GA0044870	15	126585231	0.525161	3.58633	LW	Fr
INRA0050101	15	127215671	2.53733	1.22027	LW	Leg
WU_10.2_15_131467174	15	131467174	2.10272	0.030428	LW	Leg
WU_10.2_15_133321393	15	133321393	2.18474	0.50764	LW	Leg
ASGA0070696	15	134984250	2.08799	0.245986	LW	Leg
WU_10.2_15_135525698	15	135525698	0.264876	2.25709	LW	Fr
WU_10.2_15_135877526	15	135877526	0.420344	2.38755	LW	Fr
WU_10.2_15_136260404	15	136260404	2.21152	1.08791	LA	Leg
M1GA0020479	15	136939726	2.05877	0.273141	LA	Leg
WU_10.2_15_139280804	15	139280804	0.546875	2.80564	LW	Fr
WU_10.2_15_141435152	15	141435152	2.13092	0.0763263	LW	Leg
15_141834965	15	141834965	2.47179	0.145372	LW	Leg
WU_10.2_15_142909793	15	142909793	0.0784453	2.32292	LW	Fr
WU_10.2_15_143066176	15	143066176	0.32278	2.46455	LW	Fr
ASGA0071418	15	145930581	0.585885	3.19346	LW	Fr
M1GA0020561	15	146016611	2.41356	0.375366	LA	Leg
H3GA0045481	15	146927575	2.32755	1.27049	LW	Leg
ALGA0088187	15	147839581	2.22352	0.10462	LA	Leg
ALGA0088181	15	147847182	2.12038	0.057023	LA	Leg
WU_10.2_15_148834075	15	148834075	2.43798	0.0646787	LA	Leg
WU_10.2_15_149610846	15	149610846	2.25231	0.781389	LW	Leg
MARC0018135	15	150771249	2.06943	0.554399	LW	Leg
WU_10.2_15_153337412	15	153337412	2.00226	0.00429913	LW	Leg
WU_10.2_15_155104199	15	155104199	2.17017	0.102017	LW	Leg
ALGA0104377	15	156215083	0.0698081	2.03801	LA	Fr
MARC0030550	15	156475859	0.127625	2.13103	LA	Fr
ALGA0107714	15	156497770	0.127625	2.13103	LA	Fr
WU_10.2_15_156586504	15	156586504	0.0905317	2.00888	LA	Fr
WU_10.2_15_156610888	15	156610888	0.0905317	2.00888	LA	Fr
WU_10.2_16_1521570	16	1521570	2.4691	0.249273	LW	Leg
MARC0107047	16	1715082	2.75485	1.01244	LW	Leg
H3GA0045785	16	3052091	1.29598	2.22711	LW	Fr
MARC0059877	16	5477185	2.19412	0.0592328	LA	Leg
M1GA0020869	16	6551393	0.160776	2.85716	LW	Fr
DRGA0015744	16	6643298	2.33102	0.0530403	LW	Leg
WU_10.2_16_8119755	16	8119755	2.32492	0.777431	LW	Leg
WU_10.2_16_8154244	16	8154244	0.816581	3.76198	LW	Fr
H3GA0045998	16	10023136	2.38463	0.868927	LW	Leg
ASGA0093465	16	12124058	2.56939	0.103087	LA	Leg
ASGA0089410	16	14823848	0.388141	2.02211	LW	Fr
WU_10.2_16_18575556	16	18575556	2.07789	0.93009	LA	Leg
ALGA0089383	16	18953899	2.04091	0.212236	LA	Leg
ALGA0120028	16	20283297	2.33155	0.925735	LA	Leg
H3GA0046184	16	21268751	1.15286	2.2075	LA	Fr
WU_10.2_16_21288599	16	21288599	2.13805	0.845634	LW	Leg
ALGA0089536	16	21353953	2.18713	0.236939	LA	Leg
MARC0086770	16	21427378	0.0753093	2.23698	LW	Fr
ASGA0100474	16	21514601	0.903002	2.27049	LA	Fr
DRGA0015962	16	24329028	2.22959	1.17043	LW	Leg
ALGA0089813	16	25999742	2.3081	0.894483	LA	Leg
INRA0051331	16	26037972	0.377521	2.91158	LW	Fr
ALGA0089851	16	26619363	2.13986	0.730609	LW	Leg
DIAS0001581	16	27702949	0.981829	2.07166	LA	Fr
16_27900868	16	27900868	0.923136	2.22626	LA	Fr
ALGA0089955	16	29645155	2.19687	0.560775	LW	Leg
MARC0013435	16	30289787	2.51623	1.53489	LW	Leg
H3GA0046376	16	30709921	2.43798	1.54138	LA	Leg
ALGA0122719	16	30912066	0.0642655	2.36195	LA	Fr
ALGA0090009	16	31016837	2.15136	1.70462	LA	Leg
ALGA0090013	16	31061247	2.15136	1.70462	LA	Leg
ASGA0072851	16	31153189	3.56297	1.22324	LA	Leg
WU_10.2_16_31311421	16	31311421	3.56297	1.22324	LA	Leg
ALGA0090027	16	31380801	3.25465	1.93482	LA	Leg
ALGA0090051	16	32310737	2.04091	1.52364	LA	Leg
ALGA0090051	16	32310737	2.18121	0.47057	LW	Leg
INRA0051405	16	32429434	2.43798	1.56428	LA	Leg
MARC0082327	16	32580224	2.19815	3.27173	LA	Leg
MARC0082327	16	32580224	2.19815	3.27173	LA	Fr
ASGA0072890	16	32682664	2.19815	3.27173	LA	Leg
ASGA0072890	16	32682664	2.19815	3.27173	LA	Fr
DRGA0016063	16	32872449	2.70199	2.7249	LA	Leg
DRGA0016063	16	32872449	2.70199	2.7249	LA	Fr
H3GA0046398	16	32892613	2.70199	2.7249	LA	Leg
H3GA0046398	16	32892613	2.70199	2.7249	LA	Fr
MARC0020433	16	32914270	2.89638	3.04601	LA	Leg
MARC0020433	16	32914270	2.89638	3.04601	LA	Fr
ASGA0072899	16	33002382	2.78808	2.05752	LA	Leg
ASGA0072899	16	33002382	2.78808	2.05752	LA	Fr
M1GA0020973	16	33023882	3.03097	1.68014	LA	Leg
DRGA0016071	16	33038762	2.09775	0.624661	LA	Leg
MARC0036143	16	33073648	0.178582	2.33816	LW	Fr
ASGA0072900	16	33125788	2.89638	3.04601	LA	Leg
ASGA0072900	16	33125788	2.89638	3.04601	LA	Fr
ALGA0090083	16	33163130	2.47782	0.355487	LA	Leg
ALGA0101874	16	33317499	1.82239	3.21793	LA	Fr
WU_10.2_16_33451789	16	33451789	2.00795	1.3505	LA	Leg
ALGA0090097	16	33577312	2.21985	1.07373	LA	Leg
ASGA0072905	16	33602866	1.81348	3.23845	LA	Fr
MARC0006026	16	33866754	0.666664	2.12455	LA	Fr
ALGA0090112	16	33905749	0.666664	2.12455	LA	Fr
ALGA0090145	16	34651451	0.790418	2.36371	LA	Fr
ASGA0072968	16	35190026	1.63635	2.19466	LA	Fr
WU_10.2_16_35829257	16	35829257	2.14407	1.74215	LA	Leg
MARC0016233	16	37202657	2.0292	0.828518	LA	Leg
MARC0008552	16	37313099	2.73862	1.58133	LA	Leg
ASGA0073067	16	37448044	3.01308	1.61458	LA	Leg
ASGA0073079	16	37966104	2.22503	1.22764	LA	Leg
ASGA0097154	16	38383883	2.45572	0.163399	LW	Leg
ALGA0090443	16	41870703	2.37703	0.851957	LW	Leg
ALGA0090450	16	42082484	0.834724	2.04994	LA	Fr
ALGA0090483	16	42856916	2.27387	0.350209	LW	Leg
WU_10.2_16_47968058	16	47968058	0.420572	2.52272	LW	Fr
MARC0007807	16	48666535	0.441932	4.08333	LW	Fr
ASGA0073524	16	59541209	0.0720865	2.47706	LW	Fr
ASGA0073571	16	59734413	0.16337	2.07304	LW	Fr
MARC0098653	16	63821288	2.88777	0.877868	LA	Leg
WU_10.2_16_66449474	16	66449474	2.87902	0.605762	LW	Leg
ALGA0091166	16	67277508	2.03583	0.129132	LW	Leg
H3GA0046876	16	68669105	2.27358	0.508609	LW	Leg
WU_10.2_16_69106798	16	69106798	0.662593	3.45499	LW	Fr
WU_10.2_16_69198243	16	69198243	1.73431	2.55876	LW	Fr
WU_10.2_16_69280042	16	69280042	2.05927	0.672019	LW	Leg
ALGA0091244	16	69551386	2.40447	0.162733	LW	Leg
H3GA0046924	16	70269239	0.279388	3.39701	LW	Fr
MARC0102598	16	70336298	2.22511	0.0412679	LA	Leg
INRA0051917	16	70485266	0.825063	2.04218	LA	Fr
WU_10.2_16_71242302	16	71242302	0.248417	2.14488	LA	Fr
ALGA0110277	16	71292574	0.177517	2.18538	LA	Fr
ASGA0074199	16	77228588	0.0448964	2.34375	LW	Fr
ALGA0091889	16	78809194	0.34284	2.13276	LW	Fr
ASGA0074369	16	78887907	1.24601	2.49897	LW	Fr
WU_10.2_16_79908449	16	79908449	0.47517	2.7624	LW	Fr
WU_10.2_16_80121602	16	80121602	1.20747	2.65157	LW	Fr
MARC0020344	16	81255133	2.66258	0.257061	LW	Leg
WU_10.2_16_82450990	16	82450990	0.687683	2.05353	LW	Fr
ASGA0074743	16	82856026	0.573077	2.24687	LW	Fr
H3GA0055261	16	83552371	2.01348	0.18486	LW	Leg
WU_10.2_17_1394322	17	1394322	2.55495	0.027227	LW	Leg
ALGA0092581	17	1533768	1.99682	2.55991	LW	Fr
WU_10.2_17_3367575	17	3367575	0.490809	2.0997	LW	Fr
ALGA0092769	17	4177068	2.08817	0.305637	LW	Leg
WU_10.2_17_5614355	17	5614355	2.532	0.665147	LW	Leg
ALGA0092908	17	6345490	2.22511	0.204597	LA	Leg
DRGA0016517	17	7572534	0.10353	2.43537	LW	Fr
WU_10.2_17_8144822	17	8144822	0.0587533	2.22377	LW	Fr
ALGA0092970	17	8278751	3.4167	0.22388	LW	Leg
ASGA0075205	17	8767360	0.0446931	2.31959	LW	Fr
MARC0018046	17	9137676	2.89805	0.468286	LW	Leg
ALGA0093131	17	12203316	0.579121	2.11359	LW	Fr
WU_10.2_17_17910172	17	17910172	4.55822	0.314095	LW	Leg
WU_10.2_17_18856897	17	18856897	2.14758	0.738197	LW	Leg
WU_10.2_17_19796001	17	19796001	3.16441	0.101479	LW	Leg
ALGA0093616	17	20881789	2.5109	0.23106	LW	Leg
ALGA0093683	17	22650092	3.15063	1.06216	LW	Leg
ALGA0093770	17	24560843	2.45123	0.494844	LW	Leg
WU_10.2_17_25038457	17	25038457	2.71202	0.139171	LW	Leg
WU_10.2_17_26420026	17	26420026	2.10776	0.494261	LW	Leg
WU_10.2_17_27248501	17	27248501	2.21856	0.228915	LW	Leg
WU_10.2_17_29076590	17	29076590	2.32886	0.61632	LW	Leg
H3GA0048195	17	29667574	2.45547	1.04095	LW	Leg
MARC0028327	17	30424922	0.134311	2.2331	LW	Fr
ASGA0076608	17	38762754	2.0816	0.685242	LW	Leg
M1GA0021999	17	41645205	3.53988	0.243248	LW	Leg
ALGA0094820	17	41677314	0.203471	2.42127	LW	Fr
ASGA0076845	17	43276335	0.18214	2.86175	LW	Fr
DIAS0000366	17	45206599	0.112769	2.09949	LW	Fr
WU_10.2_17_45522054	17	45522054	2.23239	1.2558	LW	Leg
WU_10.2_17_46383209	17	46383209	0.321632	2.34371	LW	Fr
H3GA0049200	17	52783470	2.21889	0.301412	LA	Leg
MARC0071280	17	52947363	2.3719	0.5612	LA	Leg
DRGA0015952	17	54333523	2.34197	0.262173	LW	Leg
WU_10.2_17_54990882	17	54990882	0.0231459	2.08939	LW	Fr
H3GA0049350	17	56774684	2.53256	0.00579362	LW	Leg
ALGA0095739	17	58781402	2.11404	0.346116	LA	Leg
ASGA0077668	17	59618354	0.286962	2.20031	LW	Fr
MARC0105409	17	59836538	0.151319	2.08243	LW	Fr
WU_10.2_17_59880568	17	59880568	0.304429	2.6505	LW	Fr
ASGA0077707	17	60017456	2.3301	0.686777	LA	Leg
WU_10.2_17_60039272	17	60039272	3.15394	0.120673	LA	Leg
MARC0062876	17	60212994	2.00914	0.622021	LA	Leg
WU_10.2_17_60564535	17	60564535	2.00671	0.566396	LW	Leg
WU_10.2_17_60793117	17	60793117	2.1699	0.444859	LA	Leg
WU_10.2_17_60798305	17	60798305	2.46723	0.472407	LA	Leg
INRA0054430	17	60830750	2.46723	0.472407	LA	Leg
MARC0083106	17	61279745	2.16172	0.888636	LW	Leg
ASGA0077839	17	61730996	0.172061	2.10518	LW	Fr
WU_10.2_17_61811415	17	61811415	2.15441	0.121945	LW	Leg
WU_10.2_17_62634845	17	62634845	0.508711	2.39866	LW	Fr
INRA0054588	17	62646442	0.339155	2.44893	LW	Fr
WU_10.2_17_62746439	17	62746439	0.0984708	2.69811	LW	Fr
DRGA0016832	17	63070025	2.13707	0.0821805	LA	Leg
WU_10.2_17_63459895	17	63459895	2.39542	0.0637317	LA	Leg
WU_10.2_17_63828466	17	63828466	0.224143	2.7097	LW	Fr
MARC0044488	17	64009869	0.454942	2.12486	LA	Fr
ASGA0077999	17	64046168	0.454942	2.12486	LA	Fr
M1GA0022382	17	64098508	0.454942	2.12486	LA	Fr
DRGA0016846	17	64680839	2.19073	2.23934	LA	Leg
DRGA0016846	17	64680839	2.19073	2.23934	LA	Fr
M1GA0022431	17	64806147	2.19715	0.710495	LW	Leg
ASGA0078111	17	64965732	0.517772	2.06399	LA	Fr
H3GA0049828	17	65224808	0.264579	2.98599	LW	Fr
17_65399632	17	65399632	0.0441381	2.50713	LW	Fr
ASGA0078202	17	65414736	0.73547	2.15027	LA	Fr
WU_10.2_17_65951361	17	65951361	2.44101	0.478044	LW	Leg
18_2227116	18	2227116	0.492698	2.34881	LW	Fr
WU_10.2_18_2528899	18	2528899	2.58027	0.186354	LW	Leg
WU_10.2_18_2928878	18	2928878	0.329062	3.04865	LW	Fr
ASGA0096637	18	3080751	0.116907	2.31218	LW	Fr
ASGA0100463	18	4417161	2.41121	0.00965054	LW	Leg
ASGA0097549	18	4711381	0.797205	2.65119	LW	Fr
WU_10.2_18_4727355	18	4727355	0.24715	2.30086	LW	Fr
WU_10.2_18_5548388	18	5548388	0.247501	2.04566	LA	Fr
WU_10.2_18_5564929	18	5564929	0.247501	2.04566	LA	Fr
ASGA0100573	18	5826740	0.0723488	2.50425	LA	Fr
ASGA0093702	18	5832148	0.0723488	2.50425	LA	Fr
WU_10.2_18_8277533	18	8277533	2.10082	1.10422	LW	Leg
ALGA0096970	18	9855129	0.208896	2.05667	LW	Fr
M1GA0023045	18	10064959	2.95345	0.265012	LW	Leg
WU_10.2_18_12213290	18	12213290	0.498414	2.01547	LW	Fr
INRA0055248	18	13959002	0.309986	2.14551	LW	Fr
18_14003636	18	14003636	2.02472	0.987239	LW	Leg
ALGA0097092	18	14122641	2.24537	0.00576893	LW	Leg
ALGA0097461	18	24828483	0.190346	3.76571	LW	Fr
WU_10.2_18_24924511	18	24924511	2.06125	0.344473	LW	Leg
INRA0055510	18	25821840	3.42256	0.505064	LW	Leg
ALGA0097585	18	26851622	0.464337	2.71035	LW	Fr
ASGA0079343	18	26977792	2.13201	0.36015	LA	Leg
ALGA0097593	18	27001689	0.459046	2.15761	LW	Fr
ASGA0079344	18	27029669	2.14487	0.355384	LA	Leg
MARC0003151	18	28121767	0.885447	2.98617	LW	Fr
ALGA0097813	18	32547444	0.0592564	2.70064	LW	Fr
WU_10.2_18_48177380	18	48177380	0.0650184	2.13718	LA	Fr
WU_10.2_18_48204887	18	48204887	0.0650184	2.13718	LA	Fr
WU_10.2_18_48642830	18	48642830	0.248673	2.63201	LA	Fr
WU_10.2_18_48682315	18	48682315	0.496041	3.02062	LA	Fr
WU_10.2_18_49215627	18	49215627	0.120886	2.09757	LA	Fr
WU_10.2_18_49439954	18	49439954	2.13662	0.432884	LW	Leg
ALGA0098509	18	50782981	0.316647	2.12069	LW	Fr
ASGA0105879	18	51030068	2.1952	0.00933961	LW	Leg
ASGA0080241	18	53734697	0.643215	2.31816	LW	Fr
H3GA0051133	18	54194183	2.09114	0.0858791	LW	Leg
WU_10.2_18_57436502	18	57436502	0.0578678	2.58949	LW	Fr
WU_10.2_18_59006153	18	59006153	0.13146	4.06972	LW	Fr
WU_10.2_18_59907615	18	59907615	0.106341	2.03857	LA	Fr
WU_10.2_18_61134499	18	61134499	0.211687	2.0071	LW	Fr

## Sheet: Supp. T2. VEP rrBLUP
Supp. Table 2. VEP rrBLUP
#Uploaded_variation	Location	Allele	Consequence	IMPACT	SYMBOL	Gene	Feature_type	Feature	BIOTYPE	EXON	INTRON	HGVSc	HGVSp	cDNA_position	CDS_position	Protein_position	Amino_acids	Codons	Existing_variation	DISTANCE	STRAND	FLAGS	SYMBOL_SOURCE	HGNC_ID	MANE	TSL	APPRIS	CCDS	ENSP	SWISSPROT	TREMBL	UNIPARC	UNIPROT_ISOFORM	REFSEQ_MATCH	SOURCE	REFSEQ_OFFSET	SIFT	HGVS_OFFSET	CLIN_SIG	SOMATIC	PHENO			FRMD1
ALGA0000218	1:1131809-1131809	A	intergenic_variant	MODIFIER	-	-	-	-	-	-	-	-	-	-	-	-	-	-	rs81350796	-	-	-	-	-	-	-	-	-	-	-	-	-	-	-	-	-	-	-	-	-	-			RPS6KA2
ASGA0102762	1:1447000-1447000	G	intergenic_variant	MODIFIER	-	-	-	-	-	-	-	-	-	-	-	-	-	-	rs81324141	-	-	-	-	-	-	-	-	-	-	-	-	-	-	-	-	-	-	-	-	-	-			PRKN
MARC0076778	1:1448659-1448659	A	intergenic_variant	MODIFIER	-	-	-	-	-	-	-	-	-	-	-	-	-	-	rs81262773	-	-	-	-	-	-	-	-	-	-	-	-	-	-	-	-	-	-	-	-	-	-			MAP3K4
MARC0015795	1:1463092-1463092	C	intergenic_variant	MODIFIER	-	-	-	-	-	-	-	-	-	-	-	-	-	-	rs81285456	-	-	-	-	-	-	-	-	-	-	-	-	-	-	-	-	-	-	-	-	-	-			SAMD5
WU_10.2_1_2667200	1:1516825-1516825	A	intron_variant	MODIFIER	-	ENSSSCG00000004017	Transcript	ENSSSCT00000027970.3	protein_coding	-	8/11	ENSSSCT00000027970.3:c.1069-31C>A	-	-	-	-	-	-	rs319806031	-	1	-	-	-	-	-	P1	-	ENSSSCP00000023633	-	I3LHT6	UPI001234B9EE	-	-	Ensembl	-	-	-	-	-	-			NHSL1
WU_10.2_1_2667200	1:1516825-1516825	A	intron_variant	MODIFIER	FRMD1	100514201	Transcript	XM_005654323.3	protein_coding	-	10/13	XM_005654323.3:c.796-31C>A	-	-	-	-	-	-	rs319806031	-	1	-	EntrezGene	-	-	-	-	-	XP_005654380.2	-	-	-	-	-	RefSeq	-	-	-	-	-	-			ARFGEF3
WU_10.2_1_2667200	1:1516825-1516825	A	intron_variant	MODIFIER	FRMD1	100514201	Transcript	XM_021085716.1	protein_coding	-	9/12	XM_021085716.1:c.1300-31C>A	-	-	-	-	-	-	rs319806031	-	1	-	EntrezGene	-	-	-	-	-	XP_020941375.1	-	-	-	-	-	RefSeq	-	-	-	-	-	-			MAP3K5
WU_10.2_1_2667200	1:1516825-1516825	A	intron_variant	MODIFIER	FRMD1	100514201	Transcript	XM_021085728.1	protein_coding	-	8/11	XM_021085728.1:c.619-31C>A	-	-	-	-	-	-	rs319806031	-	1	-	EntrezGene	-	-	-	-	-	XP_020941387.1	-	-	-	-	-	RefSeq	-	-	-	-	-	-			AHI1
WU_10.2_1_3387184	1:2244176-2244176	C	intron_variant	MODIFIER	RPS6KA2	ENSSSCG00000004022	Transcript	ENSSSCT00000004447.4	protein_coding	-	2/21	ENSSSCT00000004447.4:c.124-17926T>C	-	-	-	-	-	-	rs322032799	-	1	-	HGNC	HGNC:10431	-	-	-	-	ENSSSCP00000004346	-	F1SBY1	UPI001235ED5A	-	-	Ensembl	-	-	-	-	-	-			TBPL1
WU_10.2_1_3387184	1:2244176-2244176	C	intron_variant	MODIFIER	RPS6KA2	ENSSSCG00000004022	Transcript	ENSSSCT00000044784.2	protein_coding	-	2/24	ENSSSCT00000044784.2:c.-218-17926T>C	-	-	-	-	-	-	rs322032799	-	1	-	HGNC	HGNC:10431	-	-	-	-	ENSSSCP00000054657	-	A0A287BDQ5	UPI00123700D3	-	-	Ensembl	-	-	-	-	-	-			ENPP1
WU_10.2_1_3387184	1:2244176-2244176	C	intron_variant	MODIFIER	RPS6KA2	ENSSSCG00000004022	Transcript	ENSSSCT00000049529.2	protein_coding	-	2/22	ENSSSCT00000049529.2:c.124-17926T>C	-	-	-	-	-	-	rs322032799	-	1	-	HGNC	HGNC:10431	-	-	-	-	ENSSSCP00000040577	-	A0A287A993	UPI000BADAA37	-	-	Ensembl	-	-	-	-	-	-			NKAIN2
WU_10.2_1_3387184	1:2244176-2244176	C	intron_variant	MODIFIER	RPS6KA2	ENSSSCG00000004022	Transcript	ENSSSCT00000058943.2	protein_coding	-	2/22	ENSSSCT00000058943.2:c.123+36296T>C	-	-	-	-	-	-	rs322032799	-	1	-	HGNC	HGNC:10431	-	-	A2	-	ENSSSCP00000040317	-	A0A287A8Q2	UPI001236CB65	-	-	Ensembl	-	-	-	-	-	-			TBC1D32
WU_10.2_1_3387184	1:2244176-2244176	C	intron_variant	MODIFIER	RPS6KA2	ENSSSCG00000004022	Transcript	ENSSSCT00000078486.1	protein_coding	-	2/23	ENSSSCT00000078486.1:c.124-17926T>C	-	-	-	-	-	-	rs322032799	-	1	-	HGNC	HGNC:10431	-	-	P5	-	ENSSSCP00000071955	-	A0A5G2R6J0	UPI0012353065	-	-	Ensembl	-	-	-	-	-	-			ROS1
WU_10.2_1_3387184	1:2244176-2244176	C	intron_variant	MODIFIER	RPS6KA2	100515286	Transcript	XM_021086109.1	protein_coding	-	2/22	XM_021086109.1:c.124-17926T>C	-	-	-	-	-	-	rs322032799	-	1	-	EntrezGene	HGNC:10431	-	-	-	-	XP_020941768.1	-	-	-	-	-	RefSeq	-	-	-	-	-	-			KCNQ5
ALGA0000120	1:2272319-2272319	C	intron_variant	MODIFIER	RPS6KA2	ENSSSCG00000004022	Transcript	ENSSSCT00000004447.4	protein_coding	-	3/21	ENSSSCT00000004447.4:c.174+10167A>C	-	-	-	-	-	-	rs81349160	-	1	-	HGNC	HGNC:10431	-	-	-	-	ENSSSCP00000004346	-	F1SBY1	UPI001235ED5A	-	-	Ensembl	-	-	-	-	-	-			SNX14
ALGA0000120	1:2272319-2272319	C	intron_variant	MODIFIER	RPS6KA2	ENSSSCG00000004022	Transcript	ENSSSCT00000041914.2	protein_coding	-	2/20	ENSSSCT00000041914.2:c.93+10167A>C	-	-	-	-	-	-	rs81349160	-	1	-	HGNC	HGNC:10431	-	-	-	-	ENSSSCP00000053197	-	A0A287B9M7	UPI000BADA65B	-	-	Ensembl	-	-	-	-	-	-			ORC3
ALGA0000120	1:2272319-2272319	C	intron_variant	MODIFIER	RPS6KA2	ENSSSCG00000004022	Transcript	ENSSSCT00000044784.2	protein_coding	-	3/24	ENSSSCT00000044784.2:c.-185+10184A>C	-	-	-	-	-	-	rs81349160	-	1	-	HGNC	HGNC:10431	-	-	-	-	ENSSSCP00000054657	-	A0A287BDQ5	UPI00123700D3	-	-	Ensembl	-	-	-	-	-	-			EPHA7
ALGA0000120	1:2272319-2272319	C	intron_variant	MODIFIER	RPS6KA2	ENSSSCG00000004022	Transcript	ENSSSCT00000049529.2	protein_coding	-	3/22	ENSSSCT00000049529.2:c.174+10167A>C	-	-	-	-	-	-	rs81349160	-	1	-	HGNC	HGNC:10431	-	-	-	-	ENSSSCP00000040577	-	A0A287A993	UPI000BADAA37	-	-	Ensembl	-	-	-	-	-	-			ASCC3
ALGA0000120	1:2272319-2272319	C	intron_variant	MODIFIER	RPS6KA2	ENSSSCG00000004022	Transcript	ENSSSCT00000058943.2	protein_coding	-	2/22	ENSSSCT00000058943.2:c.123+64439A>C	-	-	-	-	-	-	rs81349160	-	1	-	HGNC	HGNC:10431	-	-	A2	-	ENSSSCP00000040317	-	A0A287A8Q2	UPI001236CB65	-	-	Ensembl	-	-	-	-	-	-			LOC106508909
ALGA0000120	1:2272319-2272319	C	intron_variant	MODIFIER	RPS6KA2	ENSSSCG00000004022	Transcript	ENSSSCT00000078486.1	protein_coding	-	3/23	ENSSSCT00000078486.1:c.174+10167A>C	-	-	-	-	-	-	rs81349160	-	1	-	HGNC	HGNC:10431	-	-	P5	-	ENSSSCP00000071955	-	A0A5G2R6J0	UPI0012353065	-	-	Ensembl	-	-	-	-	-	-			PREP
ALGA0000120	1:2272319-2272319	C	intron_variant	MODIFIER	RPS6KA2	100515286	Transcript	XM_021086109.1	protein_coding	-	3/22	XM_021086109.1:c.174+10167A>C	-	-	-	-	-	-	rs81349160	-	1	-	EntrezGene	HGNC:10431	-	-	-	-	XP_020941768.1	-	-	-	-	-	RefSeq	-	-	-	-	-	-			DCC
MARC0038011	1:2372268-2372268	G	intron_variant	MODIFIER	RPS6KA2	ENSSSCG00000004022	Transcript	ENSSSCT00000004447.4	protein_coding	-	3/21	ENSSSCT00000004447.4:c.175-64297T>G	-	-	-	-	-	-	rs81231817	-	1	-	HGNC	HGNC:10431	-	-	-	-	ENSSSCP00000004346	-	F1SBY1	UPI001235ED5A	-	-	Ensembl	-	-	-	-	-	-			TRIP4
MARC0038011	1:2372268-2372268	G	intron_variant	MODIFIER	RPS6KA2	ENSSSCG00000004022	Transcript	ENSSSCT00000041914.2	protein_coding	-	2/20	ENSSSCT00000041914.2:c.94-64297T>G	-	-	-	-	-	-	rs81231817	-	1	-	HGNC	HGNC:10431	-	-	-	-	ENSSSCP00000053197	-	A0A287B9M7	UPI000BADA65B	-	-	Ensembl	-	-	-	-	-	-			ICE2
MARC0038011	1:2372268-2372268	G	intron_variant	MODIFIER	RPS6KA2	ENSSSCG00000004022	Transcript	ENSSSCT00000044784.2	protein_coding	-	3/24	ENSSSCT00000044784.2:c.-184-3078T>G	-	-	-	-	-	-	rs81231817	-	1	-	HGNC	HGNC:10431	-	-	-	-	ENSSSCP00000054657	-	A0A287BDQ5	UPI00123700D3	-	-	Ensembl	-	-	-	-	-	-			CEP152
MARC0038011	1:2372268-2372268	G	intron_variant	MODIFIER	RPS6KA2	ENSSSCG00000004022	Transcript	ENSSSCT00000049529.2	protein_coding	-	3/22	ENSSSCT00000049529.2:c.175-64297T>G	-	-	-	-	-	-	rs81231817	-	1	-	HGNC	HGNC:10431	-	-	-	-	ENSSSCP00000040577	-	A0A287A993	UPI000BADAA37	-	-	Ensembl	-	-	-	-	-	-			GPR176
MARC0038011	1:2372268-2372268	G	intron_variant	MODIFIER	RPS6KA2	ENSSSCG00000004022	Transcript	ENSSSCT00000052370.2	protein_coding	-	1/19	ENSSSCT00000052370.2:c.51+51165T>G	-	-	-	-	-	-	rs81231817	-	1	-	HGNC	HGNC:10431	-	-	-	-	ENSSSCP00000052983	-	A0A287BA67	UPI000BAD769D	-	-	Ensembl	-	-	-	-	-	-			ADAMTS17
MARC0038011	1:2372268-2372268	G	intron_variant	MODIFIER	RPS6KA2	ENSSSCG00000004022	Transcript	ENSSSCT00000058943.2	protein_coding	-	2/22	ENSSSCT00000058943.2:c.124-64297T>G	-	-	-	-	-	-	rs81231817	-	1	-	HGNC	HGNC:10431	-	-	A2	-	ENSSSCP00000040317	-	A0A287A8Q2	UPI001236CB65	-	-	Ensembl	-	-	-	-	-	-			ATP10A
MARC0038011	1:2372268-2372268	G	intron_variant	MODIFIER	RPS6KA2	ENSSSCG00000004022	Transcript	ENSSSCT00000061934.2	protein_coding	-	1/19	ENSSSCT00000061934.2:c.255+48849T>G	-	-	-	-	-	-	rs81231817	-	1	-	HGNC	HGNC:10431	-	-	-	-	ENSSSCP00000035213	-	A0A286ZUB4	UPI000BAD8629	-	-	Ensembl	-	-	-	-	-	-			CNDP2
MARC0038011	1:2372268-2372268	G	intron_variant	MODIFIER	RPS6KA2	ENSSSCG00000004022	Transcript	ENSSSCT00000078486.1	protein_coding	-	3/23	ENSSSCT00000078486.1:c.175-64297T>G	-	-	-	-	-	-	rs81231817	-	1	-	HGNC	HGNC:10431	-	-	P5	-	ENSSSCP00000071955	-	A0A5G2R6J0	UPI0012353065	-	-	Ensembl	-	-	-	-	-	-			CDH20
MARC0038011	1:2372268-2372268	G	upstream_gene_variant	MODIFIER	RPS6KA2	ENSSSCG00000004022	Transcript	ENSSSCT00000081849.1	protein_coding	-	-	-	-	-	-	-	-	-	rs81231817	2869	1	-	HGNC	HGNC:10431	-	-	-	-	ENSSSCP00000067298	-	A0A5G2QZC3	UPI000BAD9471	-	-	Ensembl	-	-	-	-	-	-			IGDCC4
MARC0038011	1:2372268-2372268	G	intron_variant	MODIFIER	RPS6KA2	100515286	Transcript	XM_021086109.1	protein_coding	-	3/22	XM_021086109.1:c.175-64297T>G	-	-	-	-	-	-	rs81231817	-	1	-	EntrezGene	HGNC:10431	-	-	-	-	XP_020941768.1	-	-	-	-	-	RefSeq	-	-	-	-	-	-			IGDCC3
ASGA0000170	1:2408345-2408345	A	intron_variant	MODIFIER	RPS6KA2	ENSSSCG00000004022	Transcript	ENSSSCT00000004447.4	protein_coding	-	3/21	ENSSSCT00000004447.4:c.175-28220C>A	-	-	-	-	-	-	rs81349617	-	1	-	HGNC	HGNC:10431	-	-	-	-	ENSSSCP00000004346	-	F1SBY1	UPI001235ED5A	-	-	Ensembl	-	-	-	-	-	-			JKAMP
ASGA0000170	1:2408345-2408345	A	intron_variant	MODIFIER	RPS6KA2	ENSSSCG00000004022	Transcript	ENSSSCT00000041914.2	protein_coding	-	2/20	ENSSSCT00000041914.2:c.94-28220C>A	-	-	-	-	-	-	rs81349617	-	1	-	HGNC	HGNC:10431	-	-	-	-	ENSSSCP00000053197	-	A0A287B9M7	UPI000BADA65B	-	-	Ensembl	-	-	-	-	-	-			L3HYPDH
ASGA0000170	1:2408345-2408345	A	intron_variant	MODIFIER	RPS6KA2	ENSSSCG00000004022	Transcript	ENSSSCT00000044784.2	protein_coding	-	4/24	ENSSSCT00000044784.2:c.-168-28220C>A	-	-	-	-	-	-	rs81349617	-	1	-	HGNC	HGNC:10431	-	-	-	-	ENSSSCP00000054657	-	A0A287BDQ5	UPI00123700D3	-	-	Ensembl	-	-	-	-	-	-			CCDC175
ASGA0000170	1:2408345-2408345	A	intron_variant	MODIFIER	RPS6KA2	ENSSSCG00000004022	Transcript	ENSSSCT00000049529.2	protein_coding	-	3/22	ENSSSCT00000049529.2:c.175-28220C>A	-	-	-	-	-	-	rs81349617	-	1	-	HGNC	HGNC:10431	-	-	-	-	ENSSSCP00000040577	-	A0A287A993	UPI000BADAA37	-	-	Ensembl	-	-	-	-	-	-			DMRT1
ASGA0000170	1:2408345-2408345	A	intron_variant	MODIFIER	RPS6KA2	ENSSSCG00000004022	Transcript	ENSSSCT00000052370.2	protein_coding	-	1/19	ENSSSCT00000052370.2:c.52-28220C>A	-	-	-	-	-	-	rs81349617	-	1	-	HGNC	HGNC:10431	-	-	-	-	ENSSSCP00000052983	-	A0A287BA67	UPI000BAD769D	-	-	Ensembl	-	-	-	-	-	-			PGM5
ASGA0000170	1:2408345-2408345	A	intron_variant	MODIFIER	RPS6KA2	ENSSSCG00000004022	Transcript	ENSSSCT00000058943.2	protein_coding	-	2/22	ENSSSCT00000058943.2:c.124-28220C>A	-	-	-	-	-	-	rs81349617	-	1	-	HGNC	HGNC:10431	-	-	A2	-	ENSSSCP00000040317	-	A0A287A8Q2	UPI001236CB65	-	-	Ensembl	-	-	-	-	-	-			TJP2
ASGA0000170	1:2408345-2408345	A	intron_variant	MODIFIER	RPS6KA2	ENSSSCG00000004022	Transcript	ENSSSCT00000061934.2	protein_coding	-	1/19	ENSSSCT00000061934.2:c.256-28220C>A	-	-	-	-	-	-	rs81349617	-	1	-	HGNC	HGNC:10431	-	-	-	-	ENSSSCP00000035213	-	A0A286ZUB4	UPI000BAD8629	-	-	Ensembl	-	-	-	-	-	-			GNAQ
ASGA0000170	1:2408345-2408345	A	intron_variant	MODIFIER	RPS6KA2	ENSSSCG00000004022	Transcript	ENSSSCT00000078486.1	protein_coding	-	3/23	ENSSSCT00000078486.1:c.175-28220C>A	-	-	-	-	-	-	rs81349617	-	1	-	HGNC	HGNC:10431	-	-	P5	-	ENSSSCP00000071955	-	A0A5G2R6J0	UPI0012353065	-	-	Ensembl	-	-	-	-	-	-			NCBP1
ASGA0000170	1:2408345-2408345	A	intron_variant	MODIFIER	RPS6KA2	ENSSSCG00000004022	Transcript	ENSSSCT00000081849.1	protein_coding	-	1/22	ENSSSCT00000081849.1:c.100-28220C>A	-	-	-	-	-	-	rs81349617	-	1	-	HGNC	HGNC:10431	-	-	-	-	ENSSSCP00000067298	-	A0A5G2QZC3	UPI000BAD9471	-	-	Ensembl	-	-	-	-	-	-			TMOD1
ASGA0000170	1:2408345-2408345	A	intron_variant	MODIFIER	RPS6KA2	100515286	Transcript	XM_021086109.1	protein_coding	-	3/22	XM_021086109.1:c.175-28220C>A	-	-	-	-	-	-	rs81349617	-	1	-	EntrezGene	HGNC:10431	-	-	-	-	XP_020941768.1	-	-	-	-	-	RefSeq	-	-	-	-	-	-			COL15A1
WU_10.2_1_3560483	1:2426611-2426611	A	intron_variant	MODIFIER	RPS6KA2	ENSSSCG00000004022	Transcript	ENSSSCT00000004447.4	protein_coding	-	3/21	ENSSSCT00000004447.4:c.175-9954G>A	-	-	-	-	-	-	rs343816170	-	1	-	HGNC	HGNC:10431	-	-	-	-	ENSSSCP00000004346	-	F1SBY1	UPI001235ED5A	-	-	Ensembl	-	-	-	-	-	-			PLPPR1
WU_10.2_1_3560483	1:2426611-2426611	A	intron_variant	MODIFIER	RPS6KA2	ENSSSCG00000004022	Transcript	ENSSSCT00000041914.2	protein_coding	-	2/20	ENSSSCT00000041914.2:c.94-9954G>A	-	-	-	-	-	-	rs343816170	-	1	-	HGNC	HGNC:10431	-	-	-	-	ENSSSCP00000053197	-	A0A287B9M7	UPI000BADA65B	-	-	Ensembl	-	-	-	-	-	-			SLC44A1
WU_10.2_1_3560483	1:2426611-2426611	A	intron_variant	MODIFIER	RPS6KA2	ENSSSCG00000004022	Transcript	ENSSSCT00000044784.2	protein_coding	-	4/24	ENSSSCT00000044784.2:c.-168-9954G>A	-	-	-	-	-	-	rs343816170	-	1	-	HGNC	HGNC:10431	-	-	-	-	ENSSSCP00000054657	-	A0A287BDQ5	UPI00123700D3	-	-	Ensembl	-	-	-	-	-	-			FKBP15
WU_10.2_1_3560483	1:2426611-2426611	A	intron_variant	MODIFIER	RPS6KA2	ENSSSCG00000004022	Transcript	ENSSSCT00000049529.2	protein_coding	-	3/22	ENSSSCT00000049529.2:c.175-9954G>A	-	-	-	-	-	-	rs343816170	-	1	-	HGNC	HGNC:10431	-	-	-	-	ENSSSCP00000040577	-	A0A287A993	UPI000BADAA37	-	-	Ensembl	-	-	-	-	-	-			SLC31A1
WU_10.2_1_3560483	1:2426611-2426611	A	intron_variant	MODIFIER	RPS6KA2	ENSSSCG00000004022	Transcript	ENSSSCT00000052370.2	protein_coding	-	1/19	ENSSSCT00000052370.2:c.52-9954G>A	-	-	-	-	-	-	rs343816170	-	1	-	HGNC	HGNC:10431	-	-	-	-	ENSSSCP00000052983	-	A0A287BA67	UPI000BAD769D	-	-	Ensembl	-	-	-	-	-	-			ZNF618
WU_10.2_1_3560483	1:2426611-2426611	A	intron_variant	MODIFIER	RPS6KA2	ENSSSCG00000004022	Transcript	ENSSSCT00000058943.2	protein_coding	-	2/22	ENSSSCT00000058943.2:c.124-9954G>A	-	-	-	-	-	-	rs343816170	-	1	-	HGNC	HGNC:10431	-	-	A2	-	ENSSSCP00000040317	-	A0A287A8Q2	UPI001236CB65	-	-	Ensembl	-	-	-	-	-	-			ASTN2
WU_10.2_1_3560483	1:2426611-2426611	A	intron_variant	MODIFIER	RPS6KA2	ENSSSCG00000004022	Transcript	ENSSSCT00000061934.2	protein_coding	-	1/19	ENSSSCT00000061934.2:c.256-9954G>A	-	-	-	-	-	-	rs343816170	-	1	-	HGNC	HGNC:10431	-	-	-	-	ENSSSCP00000035213	-	A0A286ZUB4	UPI000BAD8629	-	-	Ensembl	-	-	-	-	-	-			BRINP1
WU_10.2_1_3560483	1:2426611-2426611	A	intron_variant	MODIFIER	RPS6KA2	ENSSSCG00000004022	Transcript	ENSSSCT00000078486.1	protein_coding	-	3/23	ENSSSCT00000078486.1:c.175-9954G>A	-	-	-	-	-	-	rs343816170	-	1	-	HGNC	HGNC:10431	-	-	P5	-	ENSSSCP00000071955	-	A0A5G2R6J0	UPI0012353065	-	-	Ensembl	-	-	-	-	-	-			RALGPS1
WU_10.2_1_3560483	1:2426611-2426611	A	intron_variant	MODIFIER	RPS6KA2	ENSSSCG00000004022	Transcript	ENSSSCT00000081849.1	protein_coding	-	1/22	ENSSSCT00000081849.1:c.100-9954G>A	-	-	-	-	-	-	rs343816170	-	1	-	HGNC	HGNC:10431	-	-	-	-	ENSSSCP00000067298	-	A0A5G2QZC3	UPI000BAD9471	-	-	Ensembl	-	-	-	-	-	-			FAM78A
WU_10.2_1_3560483	1:2426611-2426611	A	intron_variant	MODIFIER	RPS6KA2	100515286	Transcript	XM_021086109.1	protein_coding	-	3/22	XM_021086109.1:c.175-9954G>A	-	-	-	-	-	-	rs343816170	-	1	-	EntrezGene	HGNC:10431	-	-	-	-	XP_020941768.1	-	-	-	-	-	RefSeq	-	-	-	-	-	-			PLPP7
DRGA0000017	1:3812495-3812495	A	intergenic_variant	MODIFIER	-	-	-	-	-	-	-	-	-	-	-	-	-	-	rs81296871	-	-	-	-	-	-	-	-	-	-	-	-	-	-	-	-	-	-	-	-	-	-			MED27
MARC0021584	1:5548253-5548253	C	intron_variant	MODIFIER	PRKN	ENSSSCG00000004032	Transcript	ENSSSCT00000069514.1	protein_coding	-	1/8	ENSSSCT00000069514.1:c.7+82736A>C	-	-	-	-	-	-	rs81290581	-	1	-	EntrezGene	-	-	-	-	-	ENSSSCP00000074494	-	A0A5G2RH78	UPI0012344953	-	-	Ensembl	-	-	-	-	-	-			RALGDS
MARC0021584	1:5548253-5548253	C	intron_variant	MODIFIER	PRKN	ENSSSCG00000004032	Transcript	ENSSSCT00000070113.1	protein_coding	-	1/11	ENSSSCT00000070113.1:c.7+82736A>C	-	-	-	-	-	-	rs81290581	-	1	-	EntrezGene	-	-	-	A2	-	ENSSSCP00000061874	-	Q1WDP3	UPI000095C29F	-	-	Ensembl	-	-	-	-	-	-			OLFM1
MARC0021584	1:5548253-5548253	C	intron_variant	MODIFIER	PRKN	ENSSSCG00000004032	Transcript	ENSSSCT00000075359.1	protein_coding	-	1/10	ENSSSCT00000075359.1:c.7+82736A>C	-	-	-	-	-	-	rs81290581	-	1	-	EntrezGene	-	-	-	A2	-	ENSSSCP00000067923	-	A0A5G2RBE0	UPI0012351181	-	-	Ensembl	-	-	-	-	-	-			USH2A
MARC0027411	1:5691907-5691907	A	intron_variant	MODIFIER	PRKN	ENSSSCG00000004032	Transcript	ENSSSCT00000048870.2	protein_coding	-	1/11	ENSSSCT00000048870.2:c.8-6603G>A	-	-	-	-	-	-	rs81222624	-	1	-	EntrezGene	-	-	-	P5	-	ENSSSCP00000038785	-	A0A287A4T0	UPI000BAD864F	-	-	Ensembl	-	-	-	-	-	-			SLC30A10
MARC0027411	1:5691907-5691907	A	intron_variant	MODIFIER	PRKN	ENSSSCG00000004032	Transcript	ENSSSCT00000069514.1	protein_coding	-	1/8	ENSSSCT00000069514.1:c.8-6603G>A	-	-	-	-	-	-	rs81222624	-	1	-	EntrezGene	-	-	-	-	-	ENSSSCP00000074494	-	A0A5G2RH78	UPI0012344953	-	-	Ensembl	-	-	-	-	-	-			AIDA
MARC0027411	1:5691907-5691907	A	intron_variant	MODIFIER	PRKN	ENSSSCG00000004032	Transcript	ENSSSCT00000070113.1	protein_coding	-	1/11	ENSSSCT00000070113.1:c.8-6603G>A	-	-	-	-	-	-	rs81222624	-	1	-	EntrezGene	-	-	-	A2	-	ENSSSCP00000061874	-	Q1WDP3	UPI000095C29F	-	-	Ensembl	-	-	-	-	-	-			SMYD3
MARC0027411	1:5691907-5691907	A	intron_variant	MODIFIER	PRKN	ENSSSCG00000004032	Transcript	ENSSSCT00000075359.1	protein_coding	-	1/10	ENSSSCT00000075359.1:c.8-6603G>A	-	-	-	-	-	-	rs81222624	-	1	-	EntrezGene	-	-	-	A2	-	ENSSSCP00000067923	-	A0A5G2RBE0	UPI0012351181	-	-	Ensembl	-	-	-	-	-	-			SUSD4
WU_10.2_1_8025743	1:6495295-6495295	G	intron_variant	MODIFIER	PRKN	ENSSSCG00000004032	Transcript	ENSSSCT00000004459.4	protein_coding	-	6/9	ENSSSCT00000004459.4:c.854-15987A>G	-	-	-	-	-	-	rs334294280	-	1	-	EntrezGene	-	-	-	-	-	ENSSSCP00000004358	-	F1SBW0	UPI000BAD6512	-	-	Ensembl	-	-	-	-	-	-			CRB1
WU_10.2_1_8025743	1:6495295-6495295	G	intron_variant	MODIFIER	PRKN	ENSSSCG00000004032	Transcript	ENSSSCT00000048870.2	protein_coding	-	7/11	ENSSSCT00000048870.2:c.860-15987A>G	-	-	-	-	-	-	rs334294280	-	1	-	EntrezGene	-	-	-	P5	-	ENSSSCP00000038785	-	A0A287A4T0	UPI000BAD864F	-	-	Ensembl	-	-	-	-	-	-			DENND1B
WU_10.2_1_8025743	1:6495295-6495295	G	intron_variant	MODIFIER	PRKN	ENSSSCG00000004032	Transcript	ENSSSCT00000066836.1	protein_coding	-	4/8	ENSSSCT00000066836.1:c.299-15987A>G	-	-	-	-	-	-	rs334294280	-	1	-	EntrezGene	-	-	-	-	-	ENSSSCP00000064490	-	A0A5G2QI66	UPI00123486C6	-	-	Ensembl	-	-	-	-	-	-			NEK7
WU_10.2_1_8025743	1:6495295-6495295	G	intron_variant	MODIFIER	PRKN	ENSSSCG00000004032	Transcript	ENSSSCT00000069514.1	protein_coding	-	4/8	ENSSSCT00000069514.1:c.425-15987A>G	-	-	-	-	-	-	rs334294280	-	1	-	EntrezGene	-	-	-	-	-	ENSSSCP00000074494	-	A0A5G2RH78	UPI0012344953	-	-	Ensembl	-	-	-	-	-	-			PTPRC
WU_10.2_1_8025743	1:6495295-6495295	G	intron_variant	MODIFIER	PRKN	ENSSSCG00000004032	Transcript	ENSSSCT00000070113.1	protein_coding	-	7/11	ENSSSCT00000070113.1:c.860-15987A>G	-	-	-	-	-	-	rs334294280	-	1	-	EntrezGene	-	-	-	A2	-	ENSSSCP00000061874	-	Q1WDP3	UPI000095C29F	-	-	Ensembl	-	-	-	-	-	-			KIF21B
WU_10.2_1_8025743	1:6495295-6495295	G	intron_variant	MODIFIER	PRKN	ENSSSCG00000004032	Transcript	ENSSSCT00000075359.1	protein_coding	-	6/10	ENSSSCT00000075359.1:c.776-15987A>G	-	-	-	-	-	-	rs334294280	-	1	-	EntrezGene	-	-	-	A2	-	ENSSSCP00000067923	-	A0A5G2RBE0	UPI0012351181	-	-	Ensembl	-	-	-	-	-	-			NAV1
WU_10.2_1_8025743	1:6495295-6495295	G	intron_variant	MODIFIER	PRKN	733673	Transcript	NM_001044603.2	protein_coding	-	6/10	NM_001044603.2:c.855-15987A>G	-	-	-	-	-	-	rs334294280	-	1	-	EntrezGene	-	-	-	-	-	NP_001038068.2	-	-	-	-	-	RefSeq	-	-	-	-	-	-			LINGO2
ASGA0000706	1:6992339-6992339	C	intron_variant	MODIFIER	MAP3K4	ENSSSCG00000004037	Transcript	ENSSSCT00000004465.4	protein_coding	-	1/25	ENSSSCT00000004465.4:c.363-29345A>G	-	-	-	-	-	-	rs81354726	-	-1	-	HGNC	HGNC:6856	-	-	P5	-	ENSSSCP00000004363	-	F1SB82	UPI0012356DCE	-	-	Ensembl	-	-	-	-	-	-			MOB3B
ASGA0000706	1:6992339-6992339	C	intron_variant	MODIFIER	MAP3K4	ENSSSCG00000004037	Transcript	ENSSSCT00000027521.3	protein_coding	-	1/26	ENSSSCT00000027521.3:c.138-29345A>G	-	-	-	-	-	-	rs81354726	-	-1	-	HGNC	HGNC:6856	-	-	A2	-	ENSSSCP00000025740	-	I3LNR5	UPI000BAD6EFA	-	-	Ensembl	-	-	-	-	-	-			PTCHD3
ASGA0000706	1:6992339-6992339	C	intron_variant	MODIFIER	MAP3K4	ENSSSCG00000004037	Transcript	ENSSSCT00000068428.1	protein_coding	-	1/26	ENSSSCT00000068428.1:c.140+4287A>G	-	-	-	-	-	-	rs81354726	-	-1	-	HGNC	HGNC:6856	-	-	A2	-	ENSSSCP00000065506	-	A0A5G2QLR1	UPI000A2B42CC	-	-	Ensembl	-	-	-	-	-	-			MPP7
ASGA0000706	1:6992339-6992339	C	intron_variant	MODIFIER	MAP3K4	ENSSSCG00000004037	Transcript	ENSSSCT00000068874.1	protein_coding	-	1/25	ENSSSCT00000068874.1:c.140+4287A>G	-	-	-	-	-	-	rs81354726	-	-1	-	HGNC	HGNC:6856	-	-	A2	-	ENSSSCP00000069134	-	A0A5G2QW10	UPI0012340DAD	-	-	Ensembl	-	-	-	-	-	-			WAC
ASGA0000706	1:6992339-6992339	C	intron_variant	MODIFIER	MAP3K4	ENSSSCG00000004037	Transcript	ENSSSCT00000073439.1	protein_coding	-	1/23	ENSSSCT00000073439.1:c.140+4287A>G	-	-	-	-	-	-	rs81354726	-	-1	-	HGNC	HGNC:6856	-	-	-	-	ENSSSCP00000069540	-	A0A5G2R5X4	UPI0012359907	-	-	Ensembl	-	-	-	-	-	-			SVIL
ASGA0000706	1:6992339-6992339	C	intron_variant	MODIFIER	MAP3K4	ENSSSCG00000004037	Transcript	ENSSSCT00000076442.1	protein_coding	-	1/25	ENSSSCT00000076442.1:c.140+4287A>G	-	-	-	-	-	-	rs81354726	-	-1	-	HGNC	HGNC:6856	-	-	A2	-	ENSSSCP00000059952	-	A0A5G2QNS6	UPI001236BAF6	-	-	Ensembl	-	-	-	-	-	-			ZEB1
ASGA0000706	1:6992339-6992339	C	intron_variant	MODIFIER	MAP3K4	100154202	Transcript	XM_021086224.1	protein_coding	-	1/26	XM_021086224.1:c.140+4287A>G	-	-	-	-	-	-	rs81354726	-	-1	-	EntrezGene	HGNC:6856	-	-	-	-	XP_020941883.1	-	-	-	-	-	RefSeq	-	-	-	-	-	-			MRC1
ASGA0000706	1:6992339-6992339	C	intron_variant	MODIFIER	MAP3K4	100154202	Transcript	XM_021086227.1	protein_coding	-	1/26	XM_021086227.1:c.138-29345A>G	-	-	-	-	-	-	rs81354726	-	-1	-	EntrezGene	HGNC:6856	-	-	-	-	XP_020941886.1	-	-	-	-	-	RefSeq	-	-	-	-	-	-			FRMD4A
ASGA0000706	1:6992339-6992339	C	intron_variant	MODIFIER	MAP3K4	100154202	Transcript	XM_021086232.1	protein_coding	-	1/26	XM_021086232.1:c.140+4287A>G	-	-	-	-	-	-	rs81354726	-	-1	-	EntrezGene	HGNC:6856	-	-	-	-	XP_020941891.1	-	-	-	-	-	RefSeq	-	-	-	-	-	-			PDSS1
ASGA0000706	1:6992339-6992339	C	intron_variant	MODIFIER	MAP3K4	100154202	Transcript	XM_021086234.1	protein_coding	-	1/25	XM_021086234.1:c.140+4287A>G	-	-	-	-	-	-	rs81354726	-	-1	-	EntrezGene	HGNC:6856	-	-	-	-	XP_020941893.1	-	-	-	-	-	RefSeq	-	-	-	-	-	-			ARHGAP21
ALGA0000673	1:7266468-7266468	G	intergenic_variant	MODIFIER	-	-	-	-	-	-	-	-	-	-	-	-	-	-	rs80943726	-	-	-	-	-	-	-	-	-	-	-	-	-	-	-	-	-	-	-	-	-	-			KIAA1217
WU_10.2_1_9731251	1:7887486-7887486	G	downstream_gene_variant	MODIFIER	-	ENSSSCG00000043250	Transcript	ENSSSCT00000080602.1	lncRNA	-	-	-	-	-	-	-	-	-	rs339197903	2650	1	-	-	-	-	-	-	-	-	-	-	-	-	-	Ensembl	-	-	-	-	-	-			PIP4K2A
M1GA0000672	1:8386032-8386032	C	intergenic_variant	MODIFIER	-	-	-	-	-	-	-	-	-	-	-	-	-	-	rs80852727	-	-	-	-	-	-	-	-	-	-	-	-	-	-	-	-	-	-	-	-	-	-			NEBL
WU_10.2_1_13111948	1:10923369-10923369	C	intergenic_variant	MODIFIER	-	-	-	-	-	-	-	-	-	-	-	-	-	-	rs326954276	-	-	-	-	-	-	-	-	-	-	-	-	-	-	-	-	-	-	-	-	-	-			CAMK1D
MARC0070235	1:11301273-11301273	T	intergenic_variant	MODIFIER	-	-	-	-	-	-	-	-	-	-	-	-	-	-	rs80850662	-	-	-	-	-	-	-	-	-	-	-	-	-	-	-	-	-	-	-	-	-	-			UPF2
WU_10.2_1_14859615	1:12742491-12742491	G	intergenic_variant	MODIFIER	-	-	-	-	-	-	-	-	-	-	-	-	-	-	rs337921068	-	-	-	-	-	-	-	-	-	-	-	-	-	-	-	-	-	-	-	-	-	-			LOC106505210
WU_10.2_1_15111641	1:12914529-12914529	C	intergenic_variant	MODIFIER	-	-	-	-	-	-	-	-	-	-	-	-	-	-	rs81348346	-	-	-	-	-	-	-	-	-	-	-	-	-	-	-	-	-	-	-	-	-	-			LOC106505211
ASGA0001155	1:13163823-13163823	G	intergenic_variant	MODIFIER	-	-	-	-	-	-	-	-	-	-	-	-	-	-	rs81348429	-	-	-	-	-	-	-	-	-	-	-	-	-	-	-	-	-	-	-	-	-	-			ADARB2
WU_10.2_1_20253491	1:18058312-18058312	C	intron_variant	MODIFIER	SAMD5	100522528	Transcript	XM_021072102.1	protein_coding	-	1/1	XM_021072102.1:c.466-174493A>G	-	-	-	-	-	-	rs328170681	-	-1	-	EntrezGene	-	-	-	-	-	XP_020927761.1	-	-	-	-	-	RefSeq	-	-	-	-	-	-			DIP2C
WU_10.2_1_22699231	1:20370446-20370446	A	intron_variant,non_coding_transcript_variant	MODIFIER	-	ENSSSCG00000051757	Transcript	ENSSSCT00000070875.1	lncRNA	-	1/1	ENSSSCT00000070875.1:n.300-6557C>T	-	-	-	-	-	-	rs332770730	-	-1	-	-	-	-	-	-	-	-	-	-	-	-	-	Ensembl	-	-	-	-	-	-			ATP8A2
WU_10.2_1_22699231	1:20370446-20370446	A	intron_variant,non_coding_transcript_variant	MODIFIER	-	ENSSSCG00000051757	Transcript	ENSSSCT00000086958.1	lncRNA	-	2/2	ENSSSCT00000086958.1:n.155-6557C>T	-	-	-	-	-	-	rs332770730	-	-1	-	-	-	-	-	-	-	-	-	-	-	-	-	Ensembl	-	-	-	-	-	-			LOC100523747
WU_10.2_1_22699231	1:20370446-20370446	A	intron_variant,non_coding_transcript_variant	MODIFIER	-	ENSSSCG00000051757	Transcript	ENSSSCT00000087115.1	lncRNA	-	3/3	ENSSSCT00000087115.1:n.171-6557C>T	-	-	-	-	-	-	rs332770730	-	-1	-	-	-	-	-	-	-	-	-	-	-	-	-	Ensembl	-	-	-	-	-	-			MTUS2
WU_10.2_1_22699231	1:20370446-20370446	A	intron_variant,non_coding_transcript_variant	MODIFIER	-	ENSSSCG00000051757	Transcript	ENSSSCT00000088126.1	lncRNA	-	1/1	ENSSSCT00000088126.1:n.118-6557C>T	-	-	-	-	-	-	rs332770730	-	-1	-	-	-	-	-	-	-	-	-	-	-	-	-	Ensembl	-	-	-	-	-	-			SLC46A3
ASGA0093046	1:20461114-20461114	T	intron_variant,non_coding_transcript_variant	MODIFIER	-	ENSSSCG00000051757	Transcript	ENSSSCT00000086958.1	lncRNA	-	1/2	ENSSSCT00000086958.1:n.58-9965G>A	-	-	-	-	-	-	rs81311913	-	-1	-	-	-	-	-	-	-	-	-	-	-	-	-	Ensembl	-	-	-	-	-	-			ALG5
ASGA0093046	1:20461114-20461114	T	intron_variant,non_coding_transcript_variant	MODIFIER	-	ENSSSCG00000051757	Transcript	ENSSSCT00000087115.1	lncRNA	-	1/3	ENSSSCT00000087115.1:n.31-9965G>A	-	-	-	-	-	-	rs81311913	-	-1	-	-	-	-	-	-	-	-	-	-	-	-	-	Ensembl	-	-	-	-	-	-			ENOX1
WU_10.2_1_25984481	1:23156922-23156922	T	intergenic_variant	MODIFIER	-	-	-	-	-	-	-	-	-	-	-	-	-	-	rs328656127	-	-	-	-	-	-	-	-	-	-	-	-	-	-	-	-	-	-	-	-	-	-			EPSTI1
ASGA0001701	1:25744071-25744071	T	intron_variant	MODIFIER	NHSL1	ENSSSCG00000004149	Transcript	ENSSSCT00000004585.4	protein_coding	-	1/6	ENSSSCT00000004585.4:c.283+7419C>T	-	-	-	-	-	-	rs81351221	-	1	-	HGNC	HGNC:21021	-	-	A2	-	ENSSSCP00000004482	-	F1S6X9	UPI001236463C	-	-	Ensembl	-	-	-	-	-	-			PCDH9
ASGA0001701	1:25744071-25744071	T	intron_variant	MODIFIER	NHSL1	ENSSSCG00000004149	Transcript	ENSSSCT00000063827.2	protein_coding	-	1/7	ENSSSCT00000063827.2:c.283+7419C>T	-	-	-	-	-	-	rs81351221	-	1	-	HGNC	HGNC:21021	-	-	P5	-	ENSSSCP00000046314	-	A0A287AQH6	UPI000BAD70C3	-	-	Ensembl	-	-	-	-	-	-			RBM26
ASGA0001701	1:25744071-25744071	T	intron_variant	MODIFIER	NHSL1	100156257	Transcript	XM_021087407.1	protein_coding	-	1/6	XM_021087407.1:c.-420+80388C>T	-	-	-	-	-	-	rs81351221	-	1	-	EntrezGene	HGNC:21021	-	-	-	-	XP_020943066.1	-	-	-	-	-	RefSeq	-	-	-	-	-	-			GPC5
WU_10.2_1_29501954	1:26247570-26247570	C	intron_variant	MODIFIER	ARFGEF3	ENSSSCG00000022968	Transcript	ENSSSCT00000023062.3	protein_coding	-	2/32	ENSSSCT00000023062.3:c.137+298A>G	-	-	-	-	-	-	rs332264603	-	-1	-	HGNC	HGNC:21213	-	-	-	-	ENSSSCP00000025072	-	I3LLV2	UPI000A2AF372	-	-	Ensembl	-	-	-	-	-	-			GPC6
WU_10.2_1_29501954	1:26247570-26247570	C	intron_variant	MODIFIER	ARFGEF3	ENSSSCG00000022968	Transcript	ENSSSCT00000045479.2	protein_coding	-	2/33	ENSSSCT00000045479.2:c.137+298A>G	-	-	-	-	-	-	rs332264603	-	-1	-	HGNC	HGNC:21213	-	-	P1	-	ENSSSCP00000053057	-	A0A287BAG5	UPI000A2AF942	-	-	Ensembl	-	-	-	-	-	-			ABCC4
WU_10.2_1_29501954	1:26247570-26247570	C	intron_variant	MODIFIER	ARFGEF3	ENSSSCG00000022968	Transcript	ENSSSCT00000067431.1	protein_coding	-	2/32	ENSSSCT00000067431.1:c.137+298A>G	-	-	-	-	-	-	rs332264603	-	-1	-	HGNC	HGNC:21213	-	-	-	-	ENSSSCP00000072976	-	A0A5G2RED7	UPI001234CC64	-	-	Ensembl	-	-	-	-	-	-			CLDN10
WU_10.2_1_29501954	1:26247570-26247570	C	upstream_gene_variant	MODIFIER	-	ENSSSCG00000042538	Transcript	ENSSSCT00000073567.1	pseudogene	-	-	-	-	-	-	-	-	-	rs332264603	3595	-1	-	-	-	-	-	-	-	-	-	-	-	-	-	Ensembl	-	-	-	-	-	-			DZIP1
WU_10.2_1_29501954	1:26247570-26247570	C	intron_variant	MODIFIER	ARFGEF3	ENSSSCG00000022968	Transcript	ENSSSCT00000074802.1	protein_coding	-	2/33	ENSSSCT00000074802.1:c.137+298A>G	-	-	-	-	-	-	rs332264603	-	-1	-	HGNC	HGNC:21213	-	-	-	-	ENSSSCP00000071942	-	A0A5G2RCG6	UPI001234762E	-	-	Ensembl	-	-	-	-	-	-			DNAJC3
WU_10.2_1_29501954	1:26247570-26247570	C	intron_variant	MODIFIER	ARFGEF3	ENSSSCG00000022968	Transcript	ENSSSCT00000077365.1	protein_coding	-	2/31	ENSSSCT00000077365.1:c.137+298A>G	-	-	-	-	-	-	rs332264603	-	-1	-	HGNC	HGNC:21213	-	-	-	-	ENSSSCP00000069068	-	A0A5G2QY49	UPI0012342906	-	-	Ensembl	-	-	-	-	-	-			UGGT2
WU_10.2_1_29501954	1:26247570-26247570	C	intron_variant	MODIFIER	ARFGEF3	100621590	Transcript	XM_021087436.1	protein_coding	-	2/33	XM_021087436.1:c.137+298A>G	-	-	-	-	-	-	rs332264603	-	-1	-	EntrezGene	HGNC:21213	-	-	-	-	XP_020943095.1	-	-	-	-	-	RefSeq	-	-	-	-	-	-			HS6ST3
WU_10.2_1_29501954	1:26247570-26247570	C	intron_variant	MODIFIER	ARFGEF3	100621590	Transcript	XM_021087441.1	protein_coding	-	2/32	XM_021087441.1:c.137+298A>G	-	-	-	-	-	-	rs332264603	-	-1	-	EntrezGene	HGNC:21213	-	-	-	-	XP_020943100.1	-	-	-	-	-	RefSeq	-	-	-	-	-	-			DOCK9
ASGA0096616	1:27528957-27528957	T	intron_variant	MODIFIER	MAP3K5	ENSSSCG00000026041	Transcript	ENSSSCT00000025418.3	protein_coding	-	12/28	ENSSSCT00000025418.3:c.1887-1325C>T	-	-	-	-	-	-	rs81316390	-	1	-	HGNC	HGNC:6857	-	-	A2	-	ENSSSCP00000025416	-	I3LMU4	UPI000A2B02F7	-	-	Ensembl	-	-	-	-	-	-			FGF14
ASGA0096616	1:27528957-27528957	T	intron_variant	MODIFIER	MAP3K5	ENSSSCG00000026041	Transcript	ENSSSCT00000056666.2	protein_coding	-	13/29	ENSSSCT00000056666.2:c.1911-1325C>T	-	-	-	-	-	-	rs81316390	-	1	-	HGNC	HGNC:6857	-	-	A2	-	ENSSSCP00000056411	-	A0A287BII1	UPI000A2B6434	-	-	Ensembl	-	-	-	-	-	-			FAM155A
ASGA0096616	1:27528957-27528957	T	intron_variant	MODIFIER	MAP3K5	ENSSSCG00000026041	Transcript	ENSSSCT00000063024.2	protein_coding	-	14/30	ENSSSCT00000063024.2:c.2088-1325C>T	-	-	-	-	-	-	rs81316390	-	1	-	HGNC	HGNC:6857	-	-	P5	-	ENSSSCP00000034168	-	A0A286ZRB9	UPI000BAD92F6	-	-	Ensembl	-	-	-	-	-	-			MYO16
ASGA0096616	1:27528957-27528957	T	intron_variant	MODIFIER	MAP3K5	100622769	Transcript	XM_021072505.1	protein_coding	-	13/29	XM_021072505.1:c.1911-1325C>T	-	-	-	-	-	-	rs81316390	-	1	-	EntrezGene	HGNC:6857	-	-	-	-	XP_020928164.1	-	-	-	-	-	RefSeq	-	-	-	-	-	-			TMEM255B
ASGA0096616	1:27528957-27528957	T	intron_variant	MODIFIER	MAP3K5	100622769	Transcript	XM_021072507.1	protein_coding	-	12/28	XM_021072507.1:c.1887-1325C>T	-	-	-	-	-	-	rs81316390	-	1	-	EntrezGene	HGNC:6857	-	-	-	-	XP_020928166.1	-	-	-	-	-	RefSeq	-	-	-	-	-	-			BAIAP2
ASGA0096616	1:27528957-27528957	T	intron_variant	MODIFIER	MAP3K5	100622769	Transcript	XM_021072512.1	protein_coding	-	13/29	XM_021072512.1:c.1536-1325C>T	-	-	-	-	-	-	rs81316390	-	1	-	EntrezGene	HGNC:6857	-	-	-	-	XP_020928171.1	-	-	-	-	-	RefSeq	-	-	-	-	-	-			RPTOR
ASGA0096616	1:27528957-27528957	T	intron_variant	MODIFIER	MAP3K5	100622769	Transcript	XM_021072516.1	protein_coding	-	13/29	XM_021072516.1:c.1470-1325C>T	-	-	-	-	-	-	rs81316390	-	1	-	EntrezGene	HGNC:6857	-	-	-	-	XP_020928175.1	-	-	-	-	-	RefSeq	-	-	-	-	-	-			RBFOX3
ALGA0002083	1:28508020-28508020	A	intergenic_variant	MODIFIER	-	-	-	-	-	-	-	-	-	-	-	-	-	-	rs80799748	-	-	-	-	-	-	-	-	-	-	-	-	-	-	-	-	-	-	-	-	-	-			TIMP2
ALGA0002094	1:28614842-28614842	C	intron_variant	MODIFIER	AHI1	ENSSSCG00000004166	Transcript	ENSSSCT00000004605.3	protein_coding	-	13/26	ENSSSCT00000004605.3:c.1745+373T>C	-	-	-	-	-	-	rs81352552	-	1	-	HGNC	HGNC:21575	-	-	A2	-	ENSSSCP00000004502	-	F1S3R7	UPI000BAD8431	-	-	Ensembl	-	-	-	-	-	-			MGAT5B
ALGA0002094	1:28614842-28614842	C	intron_variant	MODIFIER	AHI1	ENSSSCG00000004166	Transcript	ENSSSCT00000060523.2	protein_coding	-	14/23	ENSSSCT00000060523.2:c.1967+373T>C	-	-	-	-	-	-	rs81352552	-	1	-	HGNC	HGNC:21575	-	-	-	-	ENSSSCP00000052672	-	A0A287B8M2	UPI0012362766	-	-	Ensembl	-	-	-	-	-	-			SRP68
ALGA0002094	1:28614842-28614842	C	intron_variant	MODIFIER	AHI1	ENSSSCG00000004166	Transcript	ENSSSCT00000065502.2	protein_coding	-	13/27	ENSSSCT00000065502.2:c.1745+373T>C	-	-	-	-	-	-	rs81352552	-	1	-	HGNC	HGNC:21575	-	-	P5	-	ENSSSCP00000058055	-	A0A287BPM4	UPI000BAD726D	-	-	Ensembl	-	-	-	-	-	-			SDK2
ALGA0002094	1:28614842-28614842	C	intron_variant	MODIFIER	AHI1	100514806	Transcript	XM_003121183.6	protein_coding	-	13/26	XM_003121183.6:c.1969+373T>C	-	-	-	-	-	-	rs81352552	-	1	-	EntrezGene	HGNC:21575	-	-	-	-	XP_003121231.4	-	-	-	-	-	RefSeq	-	-	-	-	-	-			LOC102165318
MARC0034894	1:28912680-28912680	G	upstream_gene_variant	MODIFIER	-	ENSSSCG00000041469	Transcript	ENSSSCT00000087477.1	protein_coding	-	-	-	-	-	-	-	-	-	rs80841011	4902	-1	-	-	-	-	-	P1	-	ENSSSCP00000073907	-	A0A5G2RG45	UPI00017EFBA2	-	-	Ensembl	-	-	-	-	-	-			ABCA5
H3GA0001269	1:29114982-29114982	T	intron_variant,non_coding_transcript_variant	MODIFIER	-	ENSSSCG00000047392	Transcript	ENSSSCT00000086531.1	lncRNA	-	1/1	ENSSSCT00000086531.1:n.97-812C>T	-	-	-	-	-	-	rs80956580	-	1	-	-	-	-	-	-	-	-	-	-	-	-	-	Ensembl	-	-	-	-	-	-			ARSG
ALGA0002199	1:29604700-29604700	T	intergenic_variant	MODIFIER	-	-	-	-	-	-	-	-	-	-	-	-	-	-	rs80872645	-	-	-	-	-	-	-	-	-	-	-	-	-	-	-	-	-	-	-	-	-	-			NOL11
ASGA0001988	1:29938328-29938328	A	upstream_gene_variant	MODIFIER	TBPL1	ENSSSCG00000022387	Transcript	ENSSSCT00000030224.3	protein_coding	-	-	-	-	-	-	-	-	-	rs80993092	1610	-1	-	HGNC	HGNC:11589	-	-	P5	-	ENSSSCP00000026747	-	I3LRL0	UPI0002748D7D	-	-	Ensembl	-	-	-	-	-	-			PSMD12
ASGA0001988	1:29938328-29938328	A	upstream_gene_variant	MODIFIER	TBPL1	100517563	Transcript	XM_003121192.5	protein_coding	-	-	-	-	-	-	-	-	-	rs80993092	1555	-1	-	EntrezGene	HGNC:11589	-	-	-	-	XP_003121240.1	-	-	-	-	-	RefSeq	-	-	-	-	-	-			PITPNC1
DIAS0004542	1:31740851-31740851	G	intron_variant	MODIFIER	ENPP1	ENSSSCG00000004193	Transcript	ENSSSCT00000037881.2	protein_coding	-	16/24	ENSSSCT00000037881.2:c.1636-76A>C	-	-	-	-	-	-	rs321160536	-	-1	-	HGNC	HGNC:3356	-	-	P1	-	ENSSSCP00000039332	-	A0A287A5T9	UPI000BAD8229	-	-	Ensembl	-	-	-	-	-	-			LOC110256161
DIAS0004542	1:31740851-31740851	G	intron_variant	MODIFIER	ENPP1	ENSSSCG00000004193	Transcript	ENSSSCT00000042180.2	protein_coding	-	17/25	ENSSSCT00000042180.2:c.967-76A>C	-	-	-	-	-	-	rs321160536	-	-1	-	HGNC	HGNC:3356	-	-	-	-	ENSSSCP00000052724	-	A0A287B8S2	UPI0012353289	-	-	Ensembl	-	-	-	-	-	-			LINC02210-CRHR1
DIAS0004542	1:31740851-31740851	G	intron_variant	MODIFIER	ENPP1	ENSSSCG00000004193	Transcript	ENSSSCT00000065954.2	protein_coding	-	11/20	ENSSSCT00000065954.2:c.1033-76A>C	-	-	-	-	-	-	rs321160536	-	-1	-	HGNC	HGNC:3356	-	-	-	-	ENSSSCP00000047324	-	A0A287AT99	UPI00123512C7	-	-	Ensembl	-	-	-	-	-	-			CRHR1
DIAS0004542	1:31740851-31740851	G	intron_variant	MODIFIER	ENPP1	100037271	Transcript	XM_021087933.1	protein_coding	-	16/24	XM_021087933.1:c.1636-76A>C	-	-	-	-	-	-	rs321160536	-	-1	-	EntrezGene	HGNC:3356	-	-	-	-	XP_020943592.1	-	-	-	-	-	RefSeq	-	-	-	-	-	-			WNT9B
DIAS0004542	1:31740851-31740851	G	intron_variant	MODIFIER	ENPP1	100037271	Transcript	XM_021087944.1	protein_coding	-	16/22	XM_021087944.1:c.1636-76A>C	-	-	-	-	-	-	rs321160536	-	-1	-	EntrezGene	HGNC:3356	-	-	-	-	XP_020943603.1	-	-	-	-	-	RefSeq	-	-	-	-	-	-			NSF
ALGA0116136	1:31763655-31763655	T	intron_variant	MODIFIER	ENPP1	ENSSSCG00000004193	Transcript	ENSSSCT00000037881.2	protein_coding	-	2/24	ENSSSCT00000037881.2:c.313+16G>A	-	-	-	-	-	-	rs81345549	-	-1	-	HGNC	HGNC:3356	-	-	P1	-	ENSSSCP00000039332	-	A0A287A5T9	UPI000BAD8229	-	-	Ensembl	-	-	-	-	-	-			HDAC5
ALGA0116136	1:31763655-31763655	T	intron_variant	MODIFIER	ENPP1	ENSSSCG00000004193	Transcript	ENSSSCT00000042180.2	protein_coding	-	3/25	ENSSSCT00000042180.2:c.-357+16G>A	-	-	-	-	-	-	rs81345549	-	-1	-	HGNC	HGNC:3356	-	-	-	-	ENSSSCP00000052724	-	A0A287B8S2	UPI0012353289	-	-	Ensembl	-	-	-	-	-	-			HAP1
ALGA0116136	1:31763655-31763655	T	intron_variant	MODIFIER	ENPP1	100037271	Transcript	XM_021087933.1	protein_coding	-	2/24	XM_021087933.1:c.313+16G>A	-	-	-	-	-	-	rs81345549	-	-1	-	EntrezGene	HGNC:3356	-	-	-	-	XP_020943592.1	-	-	-	-	-	RefSeq	-	-	-	-	-	-			TBKBP1
ALGA0116136	1:31763655-31763655	T	intron_variant	MODIFIER	ENPP1	100037271	Transcript	XM_021087944.1	protein_coding	-	2/22	XM_021087944.1:c.313+16G>A	-	-	-	-	-	-	rs81345549	-	-1	-	EntrezGene	HGNC:3356	-	-	-	-	XP_020943603.1	-	-	-	-	-	RefSeq	-	-	-	-	-	-			SP6
ALGA0002766	1:38814432-38814432	T	intron_variant	MODIFIER	NKAIN2	ENSSSCG00000036607	Transcript	ENSSSCT00000086076.1	protein_coding	-	1/4	ENSSSCT00000086076.1:c.54+225356G>A	-	-	-	-	-	-	rs80869667	-	-1	-	HGNC	HGNC:16443	-	-	-	-	ENSSSCP00000070325	-	A0A5G2R1V0	UPI0012347180	-	-	Ensembl	-	-	-	-	-	-			CA10
ALGA0002766	1:38814432-38814432	T	intron_variant	MODIFIER	NKAIN2	ENSSSCG00000036607	Transcript	ENSSSCT00000086190.1	protein_coding	-	1/6	ENSSSCT00000086190.1:c.54+225356G>A	-	-	-	-	-	-	rs80869667	-	-1	-	HGNC	HGNC:16443	-	-	P1	-	ENSSSCP00000069048	-	A0A5G2QY30,A0A4X1TQB7	UPI0001511B46	-	-	Ensembl	-	-	-	-	-	-			MRPS23
ALGA0002766	1:38814432-38814432	T	intron_variant	MODIFIER	NKAIN2	100624679	Transcript	XM_021072767.1	protein_coding	-	1/8	XM_021072767.1:c.57+16308G>A	-	-	-	-	-	-	rs80869667	-	-1	-	EntrezGene	HGNC:16443	-	-	-	-	XP_020928426.1	-	-	-	-	-	RefSeq	-	-	-	-	-	-			ASIC2
ALGA0002766	1:38814432-38814432	T	intron_variant	MODIFIER	NKAIN2	100624679	Transcript	XM_021072781.1	protein_coding	-	1/7	XM_021072781.1:c.57+16308G>A	-	-	-	-	-	-	rs80869667	-	-1	-	EntrezGene	HGNC:16443	-	-	-	-	XP_020928440.1	-	-	-	-	-	RefSeq	-	-	-	-	-	-			EFCAB5
ALGA0002766	1:38814432-38814432	T	intron_variant	MODIFIER	NKAIN2	100624679	Transcript	XM_021072786.1	protein_coding	-	1/6	XM_021072786.1:c.57+16308G>A	-	-	-	-	-	-	rs80869667	-	-1	-	EntrezGene	HGNC:16443	-	-	-	-	XP_020928445.1	-	-	-	-	-	RefSeq	-	-	-	-	-	-			GEMIN4
ALGA0002766	1:38814432-38814432	T	intron_variant	MODIFIER	NKAIN2	100624679	Transcript	XM_021072794.1	protein_coding	-	1/6	XM_021072794.1:c.57+16308G>A	-	-	-	-	-	-	rs80869667	-	-1	-	EntrezGene	HGNC:16443	-	-	-	-	XP_020928453.1	-	-	-	-	-	RefSeq	-	-	-	-	-	-			GLOD4
ALGA0002766	1:38814432-38814432	T	intron_variant	MODIFIER	NKAIN2	100624679	Transcript	XM_021072801.1	protein_coding	-	1/6	XM_021072801.1:c.54+225356G>A	-	-	-	-	-	-	rs80869667	-	-1	-	EntrezGene	HGNC:16443	-	-	-	-	XP_020928460.1	-	-	-	-	-	RefSeq	-	-	-	-	-	-			RTN4RL1
ALGA0002766	1:38814432-38814432	T	intron_variant	MODIFIER	NKAIN2	100624679	Transcript	XM_021072806.1	protein_coding	-	2/7	XM_021072806.1:c.54+225356G>A	-	-	-	-	-	-	rs80869667	-	-1	-	EntrezGene	HGNC:16443	-	-	-	-	XP_020928465.1	-	-	-	-	-	RefSeq	-	-	-	-	-	-			LOC100517239
ALGA0002766	1:38814432-38814432	T	intron_variant	MODIFIER	NKAIN2	100624679	Transcript	XM_021072809.1	protein_coding	-	1/5	XM_021072809.1:c.57+16308G>A	-	-	-	-	-	-	rs80869667	-	-1	-	EntrezGene	HGNC:16443	-	-	-	-	XP_020928468.1	-	-	-	-	-	RefSeq	-	-	-	-	-	-			LOC100514870
ALGA0002766	1:38814432-38814432	T	intron_variant,non_coding_transcript_variant	MODIFIER	NKAIN2	100624679	Transcript	XR_002338457.1	misc_RNA	-	1/9	XR_002338457.1:n.6267+16308G>A	-	-	-	-	-	-	rs80869667	-	-1	-	EntrezGene	HGNC:16443	-	-	-	-	-	-	-	-	-	-	RefSeq	-	-	-	-	-	-			LOC100514318
ALGA0002766	1:38814432-38814432	T	intron_variant,non_coding_transcript_variant	MODIFIER	NKAIN2	100624679	Transcript	XR_002338458.1	misc_RNA	-	1/9	XR_002338458.1:n.256+225356G>A	-	-	-	-	-	-	rs80869667	-	-1	-	EntrezGene	HGNC:16443	-	-	-	-	-	-	-	-	-	-	RefSeq	-	-	-	-	-	-			LOC100517422
ALGA0002766	1:38814432-38814432	T	intron_variant,non_coding_transcript_variant	MODIFIER	NKAIN2	100624679	Transcript	XR_002338465.1	misc_RNA	-	2/10	XR_002338465.1:n.349+225356G>A	-	-	-	-	-	-	rs80869667	-	-1	-	EntrezGene	HGNC:16443	-	-	-	-	-	-	-	-	-	-	RefSeq	-	-	-	-	-	-			SPATA22
ALGA0002766	1:38814432-38814432	T	intron_variant,non_coding_transcript_variant	MODIFIER	NKAIN2	100624679	Transcript	XR_002338468.1	misc_RNA	-	1/8	XR_002338468.1:n.6267+16308G>A	-	-	-	-	-	-	rs80869667	-	-1	-	EntrezGene	HGNC:16443	-	-	-	-	-	-	-	-	-	-	RefSeq	-	-	-	-	-	-			SHPK
ALGA0002766	1:38814432-38814432	T	intron_variant,non_coding_transcript_variant	MODIFIER	NKAIN2	100624679	Transcript	XR_002338469.1	misc_RNA	-	1/8	XR_002338469.1:n.6267+16308G>A	-	-	-	-	-	-	rs80869667	-	-1	-	EntrezGene	HGNC:16443	-	-	-	-	-	-	-	-	-	-	RefSeq	-	-	-	-	-	-			CTNS
ALGA0002766	1:38814432-38814432	T	intron_variant,non_coding_transcript_variant	MODIFIER	NKAIN2	100624679	Transcript	XR_002338480.1	misc_RNA	-	1/7	XR_002338480.1:n.6267+16308G>A	-	-	-	-	-	-	rs80869667	-	-1	-	EntrezGene	HGNC:16443	-	-	-	-	-	-	-	-	-	-	RefSeq	-	-	-	-	-	-			CAMKK1
ALGA0002766	1:38814432-38814432	T	intron_variant,non_coding_transcript_variant	MODIFIER	NKAIN2	100624679	Transcript	XR_002338481.1	misc_RNA	-	1/7	XR_002338481.1:n.411+225356G>A	-	-	-	-	-	-	rs80869667	-	-1	-	EntrezGene	HGNC:16443	-	-	-	-	-	-	-	-	-	-	RefSeq	-	-	-	-	-	-			UBE2G1
ALGA0002766	1:38814432-38814432	T	intron_variant,non_coding_transcript_variant	MODIFIER	NKAIN2	100624679	Transcript	XR_002338484.1	misc_RNA	-	1/8	XR_002338484.1:n.256+225356G>A	-	-	-	-	-	-	rs80869667	-	-1	-	EntrezGene	HGNC:16443	-	-	-	-	-	-	-	-	-	-	RefSeq	-	-	-	-	-	-			SPNS2
ALGA0002766	1:38814432-38814432	T	intron_variant,non_coding_transcript_variant	MODIFIER	NKAIN2	100624679	Transcript	XR_002338499.1	misc_RNA	-	1/7	XR_002338499.1:n.256+225356G>A	-	-	-	-	-	-	rs80869667	-	-1	-	EntrezGene	HGNC:16443	-	-	-	-	-	-	-	-	-	-	RefSeq	-	-	-	-	-	-			SPNS3
ALGA0002766	1:38814432-38814432	T	intron_variant,non_coding_transcript_variant	MODIFIER	NKAIN2	100624679	Transcript	XR_002338500.1	misc_RNA	-	1/6	XR_002338500.1:n.6267+16308G>A	-	-	-	-	-	-	rs80869667	-	-1	-	EntrezGene	HGNC:16443	-	-	-	-	-	-	-	-	-	-	RefSeq	-	-	-	-	-	-			SMTNL2
ALGA0002766	1:38814432-38814432	T	intron_variant,non_coding_transcript_variant	MODIFIER	NKAIN2	100624679	Transcript	XR_002338504.1	misc_RNA	-	1/6	XR_002338504.1:n.6267+16308G>A	-	-	-	-	-	-	rs80869667	-	-1	-	EntrezGene	HGNC:16443	-	-	-	-	-	-	-	-	-	-	RefSeq	-	-	-	-	-	-			CCDC42
SIRI0000080	1:39786553-39786553	T	intergenic_variant	MODIFIER	-	-	-	-	-	-	-	-	-	-	-	-	-	-	rs340309943	-	-	-	-	-	-	-	-	-	-	-	-	-	-	-	-	-	-	-	-	-	-			PIK3R6
ASGA0002466	1:41122987-41122987	A	intron_variant	MODIFIER	TBC1D32	ENSSSCG00000004242	Transcript	ENSSSCT00000004689.4	protein_coding	-	15/33	ENSSSCT00000004689.4:c.1608+1955G>A	-	-	-	-	-	-	rs80868768	-	1	-	HGNC	HGNC:21485	-	-	P1	-	ENSSSCP00000004581	-	F1SF42	UPI0001C95ED1	-	-	Ensembl	-	-	-	-	-	-			MYH1
ASGA0002466	1:41122987-41122987	A	intron_variant	MODIFIER	TBC1D32	ENSSSCG00000004242	Transcript	ENSSSCT00000060707.2	protein_coding	-	15/31	ENSSSCT00000060707.2:c.1608+1955G>A	-	-	-	-	-	-	rs80868768	-	1	-	HGNC	HGNC:21485	-	-	-	-	ENSSSCP00000053569	-	A0A287BB61	UPI000BAD9348	-	-	Ensembl	-	-	-	-	-	-			MYH2
ASGA0002466	1:41122987-41122987	A	intron_variant	MODIFIER	TBC1D32	100156680	Transcript	XM_001926894.5	protein_coding	-	15/33	XM_001926894.5:c.1608+1955G>A	-	-	-	-	-	-	rs80868768	-	1	-	EntrezGene	HGNC:21485	-	-	-	-	XP_001926929.2	-	-	-	-	-	RefSeq	-	-	-	-	-	-			HS3ST3A1
ASGA0002466	1:41122987-41122987	A	intron_variant	MODIFIER	TBC1D32	100156680	Transcript	XM_013988502.2	protein_coding	-	15/33	XM_013988502.2:c.1608+1955G>A	-	-	-	-	-	-	rs80868768	-	1	-	EntrezGene	HGNC:21485	-	-	-	-	XP_013843956.2	-	-	-	-	-	RefSeq	-	-	-	-	-	-			NCOR1
ASGA0002466	1:41122987-41122987	A	intron_variant	MODIFIER	TBC1D32	100156680	Transcript	XM_021088926.1	protein_coding	-	13/31	XM_021088926.1:c.1281+1955G>A	-	-	-	-	-	-	rs80868768	-	1	-	EntrezGene	HGNC:21485	-	-	-	-	XP_020944585.1	-	-	-	-	-	RefSeq	-	-	-	-	-	-			FAM83G
ASGA0002466	1:41122987-41122987	A	intron_variant	MODIFIER	TBC1D32	100156680	Transcript	XM_021088930.1	protein_coding	-	13/31	XM_021088930.1:c.1083+1955G>A	-	-	-	-	-	-	rs80868768	-	1	-	EntrezGene	HGNC:21485	-	-	-	-	XP_020944589.1	-	-	-	-	-	RefSeq	-	-	-	-	-	-			SLC5A10
ASGA0002466	1:41122987-41122987	A	intron_variant	MODIFIER	TBC1D32	100156680	Transcript	XM_021088940.1	protein_coding	-	12/30	XM_021088940.1:c.867+1955G>A	-	-	-	-	-	-	rs80868768	-	1	-	EntrezGene	HGNC:21485	-	-	-	-	XP_020944599.1	-	-	-	-	-	RefSeq	-	-	-	-	-	-			CPNE4
ASGA0002466	1:41122987-41122987	A	intron_variant	MODIFIER	TBC1D32	100156680	Transcript	XM_021088942.1	protein_coding	-	11/29	XM_021088942.1:c.867+1955G>A	-	-	-	-	-	-	rs80868768	-	1	-	EntrezGene	HGNC:21485	-	-	-	-	XP_020944601.1	-	-	-	-	-	RefSeq	-	-	-	-	-	-			KCNH8
ASGA0002466	1:41122987-41122987	A	intron_variant,non_coding_transcript_variant	MODIFIER	TBC1D32	100156680	Transcript	XR_002343100.1	misc_RNA	-	15/33	XR_002343100.1:n.1772+1955G>A	-	-	-	-	-	-	rs80868768	-	1	-	EntrezGene	HGNC:21485	-	-	-	-	-	-	-	-	-	-	RefSeq	-	-	-	-	-	-			UBE2E2
DRGA0000678	1:41252287-41252287	A	intron_variant	MODIFIER	TBC1D32	ENSSSCG00000004242	Transcript	ENSSSCT00000004689.4	protein_coding	-	33/33	ENSSSCT00000004689.4:c.3783+4321G>A	-	-	-	-	-	-	rs80978537	-	1	-	HGNC	HGNC:21485	-	-	P1	-	ENSSSCP00000004581	-	F1SF42	UPI0001C95ED1	-	-	Ensembl	-	-	-	-	-	-			RARB
DRGA0000678	1:41252287-41252287	A	intron_variant	MODIFIER	TBC1D32	ENSSSCG00000004242	Transcript	ENSSSCT00000060707.2	protein_coding	-	31/31	ENSSSCT00000060707.2:c.3498+4321G>A	-	-	-	-	-	-	rs80978537	-	1	-	HGNC	HGNC:21485	-	-	-	-	ENSSSCP00000053569	-	A0A287BB61	UPI000BAD9348	-	-	Ensembl	-	-	-	-	-	-			RBMS3
DRGA0000678	1:41252287-41252287	A	intron_variant	MODIFIER	TBC1D32	100156680	Transcript	XM_001926894.5	protein_coding	-	33/33	XM_001926894.5:c.3783+4321G>A	-	-	-	-	-	-	rs80978537	-	1	-	EntrezGene	HGNC:21485	-	-	-	-	XP_001926929.2	-	-	-	-	-	RefSeq	-	-	-	-	-	-			STT3B
DRGA0000678	1:41252287-41252287	A	intron_variant	MODIFIER	TBC1D32	100156680	Transcript	XM_013988502.2	protein_coding	-	33/33	XM_013988502.2:c.3783+4321G>A	-	-	-	-	-	-	rs80978537	-	1	-	EntrezGene	HGNC:21485	-	-	-	-	XP_013843956.2	-	-	-	-	-	RefSeq	-	-	-	-	-	-			ARPP21
DRGA0000678	1:41252287-41252287	A	intron_variant	MODIFIER	TBC1D32	100156680	Transcript	XM_021088926.1	protein_coding	-	31/31	XM_021088926.1:c.3456+4321G>A	-	-	-	-	-	-	rs80978537	-	1	-	EntrezGene	HGNC:21485	-	-	-	-	XP_020944585.1	-	-	-	-	-	RefSeq	-	-	-	-	-	-			OXSR1
DRGA0000678	1:41252287-41252287	A	intron_variant	MODIFIER	TBC1D32	100156680	Transcript	XM_021088930.1	protein_coding	-	31/31	XM_021088930.1:c.3258+4321G>A	-	-	-	-	-	-	rs80978537	-	1	-	EntrezGene	HGNC:21485	-	-	-	-	XP_020944589.1	-	-	-	-	-	RefSeq	-	-	-	-	-	-			MYRIP
DRGA0000678	1:41252287-41252287	A	intron_variant	MODIFIER	TBC1D32	100156680	Transcript	XM_021088940.1	protein_coding	-	30/30	XM_021088940.1:c.3042+4321G>A	-	-	-	-	-	-	rs80978537	-	1	-	EntrezGene	HGNC:21485	-	-	-	-	XP_020944599.1	-	-	-	-	-	RefSeq	-	-	-	-	-	-			TRAK1
DRGA0000678	1:41252287-41252287	A	intron_variant	MODIFIER	TBC1D32	100156680	Transcript	XM_021088942.1	protein_coding	-	29/29	XM_021088942.1:c.3042+4321G>A	-	-	-	-	-	-	rs80978537	-	1	-	EntrezGene	HGNC:21485	-	-	-	-	XP_020944601.1	-	-	-	-	-	RefSeq	-	-	-	-	-	-			GASK1A
DRGA0000678	1:41252287-41252287	A	downstream_gene_variant	MODIFIER	TBC1D32	100156680	Transcript	XR_002343100.1	misc_RNA	-	-	-	-	-	-	-	-	-	rs80978537	4376	1	-	EntrezGene	HGNC:21485	-	-	-	-	-	-	-	-	-	-	RefSeq	-	-	-	-	-	-			FAM198A
ASGA0002570	1:44534229-44534229	G	3_prime_UTR_variant	MODIFIER	ROS1	ENSSSCG00000026978	Transcript	ENSSSCT00000041797.2	protein_coding	44/44	-	ENSSSCT00000041797.2:c.*1083A>G	-	8536	-	-	-	-	rs80926786	-	1	-	HGNC	HGNC:10261	-	-	P1	-	ENSSSCP00000047076	-	A0A287ASK6	UPI000A2B65BD	-	-	Ensembl	-	-	-	-	-	-			SCAP
ASGA0002570	1:44534229-44534229	G	intron_variant	MODIFIER	-	ENSSSCG00000045461	Transcript	ENSSSCT00000073444.1	protein_coding	-	1/3	ENSSSCT00000073444.1:c.-661+12659T>C	-	-	-	-	-	-	rs80926786	-	-1	-	-	-	-	-	P1	-	ENSSSCP00000067710	-	A0A5G2QS13	UPI00123523D9	-	-	Ensembl	-	-	-	-	-	-			QRICH1
ASGA0002570	1:44534229-44534229	G	3_prime_UTR_variant	MODIFIER	ROS1	100156931	Transcript	XM_021089087.1	protein_coding	44/44	-	XM_021089087.1:c.*1083A>G	-	8613	-	-	-	-	rs80926786	-	1	-	EntrezGene	HGNC:10261	-	-	-	-	XP_020944746.1	-	-	-	-	-	RefSeq	-	-	-	-	-	-			SNORD27
ASGA0002570	1:44534229-44534229	G	3_prime_UTR_variant	MODIFIER	ROS1	100156931	Transcript	XM_021089094.1	protein_coding	44/44	-	XM_021089094.1:c.*1083A>G	-	8610	-	-	-	-	rs80926786	-	1	-	EntrezGene	HGNC:10261	-	-	-	-	XP_020944753.1	-	-	-	-	-	RefSeq	-	-	-	-	-	-			ERC2
ASGA0002570	1:44534229-44534229	G	3_prime_UTR_variant	MODIFIER	ROS1	100156931	Transcript	XM_021089102.1	protein_coding	44/44	-	XM_021089102.1:c.*1083A>G	-	8611	-	-	-	-	rs80926786	-	1	-	EntrezGene	HGNC:10261	-	-	-	-	XP_020944761.1	-	-	-	-	-	RefSeq	-	-	-	-	-	-			FAM3D
ASGA0002570	1:44534229-44534229	G	3_prime_UTR_variant	MODIFIER	ROS1	100156931	Transcript	XM_021089103.1	protein_coding	44/44	-	XM_021089103.1:c.*1083A>G	-	8592	-	-	-	-	rs80926786	-	1	-	EntrezGene	HGNC:10261	-	-	-	-	XP_020944762.1	-	-	-	-	-	RefSeq	-	-	-	-	-	-			FHIT
ASGA0002570	1:44534229-44534229	G	3_prime_UTR_variant	MODIFIER	ROS1	100156931	Transcript	XM_021089108.1	protein_coding	44/44	-	XM_021089108.1:c.*1083A>G	-	8589	-	-	-	-	rs80926786	-	1	-	EntrezGene	HGNC:10261	-	-	-	-	XP_020944767.1	-	-	-	-	-	RefSeq	-	-	-	-	-	-			TAFA4
ASGA0002570	1:44534229-44534229	G	downstream_gene_variant	MODIFIER	ROS1	100156931	Transcript	XM_021089113.1	protein_coding	-	-	-	-	-	-	-	-	-	rs80926786	223	1	-	EntrezGene	HGNC:10261	-	-	-	-	XP_020944772.1	-	-	-	-	-	RefSeq	-	-	-	-	-	-			FAM19A4
ASGA0002570	1:44534229-44534229	G	3_prime_UTR_variant	MODIFIER	ROS1	100156931	Transcript	XM_021089122.1	protein_coding	34/34	-	XM_021089122.1:c.*1083A>G	-	7511	-	-	-	-	rs80926786	-	1	-	EntrezGene	HGNC:10261	-	-	-	-	XP_020944781.1	-	-	-	-	-	RefSeq	-	-	-	-	-	-			MITF
ASGA0002570	1:44534229-44534229	G	3_prime_UTR_variant	MODIFIER	ROS1	100156931	Transcript	XM_021089129.1	protein_coding	35/35	-	XM_021089129.1:c.*1083A>G	-	7855	-	-	-	-	rs80926786	-	1	-	EntrezGene	HGNC:10261	-	-	-	-	XP_020944788.1	-	-	-	-	-	RefSeq	-	-	-	-	-	-			SLC6A11
ASGA0002570	1:44534229-44534229	G	3_prime_UTR_variant	MODIFIER	ROS1	100156931	Transcript	XM_021089132.1	protein_coding	35/35	-	XM_021089132.1:c.*1083A>G	-	7834	-	-	-	-	rs80926786	-	1	-	EntrezGene	HGNC:10261	-	-	-	-	XP_020944791.1	-	-	-	-	-	RefSeq	-	-	-	-	-	-			ATG7
ASGA0002570	1:44534229-44534229	G	downstream_gene_variant	MODIFIER	ROS1	100156931	Transcript	XR_002343222.1	misc_RNA	-	-	-	-	-	-	-	-	-	rs80926786	1255	1	-	EntrezGene	HGNC:10261	-	-	-	-	-	-	-	-	-	-	RefSeq	-	-	-	-	-	-			CHCHD6
ALGA0003292	1:51060285-51060285	A	intergenic_variant	MODIFIER	-	-	-	-	-	-	-	-	-	-	-	-	-	-	rs80911636	-	-	-	-	-	-	-	-	-	-	-	-	-	-	-	-	-	-	-	-	-	-			GPR149
MARC0043932	1:51224005-51224005	C	intergenic_variant	MODIFIER	-	-	-	-	-	-	-	-	-	-	-	-	-	-	rs81236767	-	-	-	-	-	-	-	-	-	-	-	-	-	-	-	-	-	-	-	-	-	-			RSRC1
MARC0026427	1:52284040-52284040	C	intergenic_variant	MODIFIER	-	-	-	-	-	-	-	-	-	-	-	-	-	-	rs80874797	-	-	-	-	-	-	-	-	-	-	-	-	-	-	-	-	-	-	-	-	-	-			RARRES1
WU_10.2_1_58927999	1:52590789-52590789	A	intron_variant	MODIFIER	KCNQ5	ENSSSCG00000004281	Transcript	ENSSSCT00000004731.4	protein_coding	-	1/12	ENSSSCT00000004731.4:c.389+154967G>A	-	-	-	-	-	-	rs345508253	-	1	-	HGNC	HGNC:6299	-	-	A2	-	ENSSSCP00000004622	-	F1RTS6	UPI0001E8626A	-	-	Ensembl	-	-	-	-	-	-			IQCJ
WU_10.2_1_58927999	1:52590789-52590789	A	intron_variant	MODIFIER	KCNQ5	ENSSSCG00000004281	Transcript	ENSSSCT00000026479.3	protein_coding	-	1/15	ENSSSCT00000026479.3:c.73+33991G>A	-	-	-	-	-	-	rs345508253	-	1	-	HGNC	HGNC:6299	-	-	A2	-	ENSSSCP00000020132	-	I3L7X4	UPI0012342BDE	-	-	Ensembl	-	-	-	-	-	-			LOC100514494
WU_10.2_1_58927999	1:52590789-52590789	A	intron_variant	MODIFIER	KCNQ5	ENSSSCG00000004281	Transcript	ENSSSCT00000038363.2	protein_coding	-	1/13	ENSSSCT00000038363.2:c.389+154967G>A	-	-	-	-	-	-	rs345508253	-	1	-	HGNC	HGNC:6299	-	-	A2	-	ENSSSCP00000055488	-	A0A287BH80	UPI0001E86269	-	-	Ensembl	-	-	-	-	-	-			IL12A
WU_10.2_1_58927999	1:52590789-52590789	A	intron_variant	MODIFIER	KCNQ5	ENSSSCG00000004281	Transcript	ENSSSCT00000062194.2	protein_coding	-	1/14	ENSSSCT00000062194.2:c.389+154967G>A	-	-	-	-	-	-	rs345508253	-	1	-	HGNC	HGNC:6299	-	-	P5	-	ENSSSCP00000042207	-	A0A287AE09	UPI0001E86267	-	-	Ensembl	-	-	-	-	-	-			B3GALNT1
WU_10.2_1_58927999	1:52590789-52590789	A	intron_variant	MODIFIER	KCNQ5	ENSSSCG00000004281	Transcript	ENSSSCT00000073994.1	protein_coding	-	1/11	ENSSSCT00000073994.1:c.389+154967G>A	-	-	-	-	-	-	rs345508253	-	1	-	HGNC	HGNC:6299	-	-	-	-	ENSSSCP00000060820	-	A0A5G2QRB9	UPI0001E8626B	-	-	Ensembl	-	-	-	-	-	-			SI
WU_10.2_1_58927999	1:52590789-52590789	A	intron_variant	MODIFIER	KCNQ5	100154391	Transcript	XM_003480275.4	protein_coding	-	1/13	XM_003480275.4:c.389+154967G>A	-	-	-	-	-	-	rs345508253	-	1	-	EntrezGene	HGNC:6299	-	-	-	-	XP_003480323.1	-	-	-	-	-	RefSeq	-	-	-	-	-	-			ZBBX
WU_10.2_1_58927999	1:52590789-52590789	A	intron_variant	MODIFIER	KCNQ5	100154391	Transcript	XM_003480276.4	protein_coding	-	1/12	XM_003480276.4:c.389+154967G>A	-	-	-	-	-	-	rs345508253	-	1	-	EntrezGene	HGNC:6299	-	-	-	-	XP_003480324.1	-	-	-	-	-	RefSeq	-	-	-	-	-	-			SERPINI2
WU_10.2_1_58927999	1:52590789-52590789	A	intron_variant	MODIFIER	KCNQ5	100154391	Transcript	XM_003480277.4	protein_coding	-	1/13	XM_003480277.4:c.389+154967G>A	-	-	-	-	-	-	rs345508253	-	1	-	EntrezGene	HGNC:6299	-	-	-	-	XP_003480325.1	-	-	-	-	-	RefSeq	-	-	-	-	-	-			WDR49
WU_10.2_1_58927999	1:52590789-52590789	A	intron_variant	MODIFIER	KCNQ5	100154391	Transcript	XM_021073129.1	protein_coding	-	1/14	XM_021073129.1:c.389+154967G>A	-	-	-	-	-	-	rs345508253	-	1	-	EntrezGene	HGNC:6299	-	-	-	-	XP_020928788.1	-	-	-	-	-	RefSeq	-	-	-	-	-	-			MECOM
WU_10.2_1_58927999	1:52590789-52590789	A	intron_variant	MODIFIER	KCNQ5	100154391	Transcript	XM_021073147.1	protein_coding	-	1/14	XM_021073147.1:c.-101+143299G>A	-	-	-	-	-	-	rs345508253	-	1	-	EntrezGene	HGNC:6299	-	-	-	-	XP_020928806.1	-	-	-	-	-	RefSeq	-	-	-	-	-	-			MYNN
WU_10.2_1_58927999	1:52590789-52590789	A	intron_variant	MODIFIER	KCNQ5	100154391	Transcript	XM_021073161.1	protein_coding	-	2/14	XM_021073161.1:c.-101+143299G>A	-	-	-	-	-	-	rs345508253	-	1	-	EntrezGene	HGNC:6299	-	-	-	-	XP_020928820.1	-	-	-	-	-	RefSeq	-	-	-	-	-	-			LRRIQ4
ASGA0002927	1:54283575-54283575	G	intergenic_variant	MODIFIER	-	-	-	-	-	-	-	-	-	-	-	-	-	-	rs81354224	-	-	-	-	-	-	-	-	-	-	-	-	-	-	-	-	-	-	-	-	-	-			LRRC31
ALGA0003539	1:54338731-54338731	A	intergenic_variant	MODIFIER	-	-	-	-	-	-	-	-	-	-	-	-	-	-	rs80837569	-	-	-	-	-	-	-	-	-	-	-	-	-	-	-	-	-	-	-	-	-	-			PRKCI
DIAS0001185	1:54508888-54508888	T	synonymous_variant	LOW	SNX14	ENSSSCG00000004293	Transcript	ENSSSCT00000004747.4	protein_coding	9/27	-	ENSSSCT00000004747.4:c.831G>A	ENSSSCP00000004638.4:p.Lys277%3D	1020	831	277	K	aaG/aaA	rs330388060	-	-1	-	HGNC	HGNC:14977	-	-	-	-	ENSSSCP00000004638	-	F1S0H9	UPI001234A8F4	-	-	Ensembl	-	-	-	-	-	-			SLC7A14
DIAS0001185	1:54508888-54508888	T	synonymous_variant	LOW	SNX14	ENSSSCG00000004293	Transcript	ENSSSCT00000075598.1	protein_coding	12/31	-	ENSSSCT00000075598.1:c.960G>A	ENSSSCP00000069917.1:p.Lys320%3D	1133	960	320	K	aaG/aaA	rs330388060	-	-1	-	HGNC	HGNC:14977	-	-	P1	-	ENSSSCP00000069917	-	A0A5G2R710	UPI001234EF8E	-	-	Ensembl	-	-	-	-	-	-			TBL1XR1
DIAS0001185	1:54508888-54508888	T	synonymous_variant	LOW	SNX14	ENSSSCG00000004293	Transcript	ENSSSCT00000088154.1	protein_coding	12/22	-	ENSSSCT00000088154.1:c.960G>A	ENSSSCP00000074512.1:p.Lys320%3D	1149	960	320	K	aaG/aaA	rs330388060	-	-1	-	HGNC	HGNC:14977	-	-	-	-	ENSSSCP00000074512	-	A0A5G2RDE0	UPI0012348DB6	-	-	Ensembl	-	-	-	-	-	-			PEX5L
DIAS0001185	1:54508888-54508888	T	synonymous_variant	LOW	SNX14	ENSSSCG00000004293	Transcript	ENSSSCT00000088214.1	protein_coding	12/30	-	ENSSSCT00000088214.1:c.960G>A	ENSSSCP00000062749.1:p.Lys320%3D	1149	960	320	K	aaG/aaA	rs330388060	-	-1	-	HGNC	HGNC:14977	-	-	-	-	ENSSSCP00000062749	-	A0A5G2QEX6	UPI0012341651	-	-	Ensembl	-	-	-	-	-	-			ABCC5
DIAS0001185	1:54508888-54508888	T	missense_variant	MODERATE	SNX14	100156800	Transcript	XM_001927319.7	protein_coding	11/29	-	XM_001927319.7:c.962G>A	XP_001927354.4:p.Ser321Asn	1139	962	321	S/N	aGt/aAt	rs330388060	-	-1	-	EntrezGene	HGNC:14977	-	-	-	-	XP_001927354.4	-	-	-	-	-	RefSeq	-	-	-	-	-	-			TMEM41A
SIRI0001021	1:54927895-54927895	C	intergenic_variant	MODIFIER	-	-	-	-	-	-	-	-	-	-	-	-	-	-	rs327592303	-	-	-	-	-	-	-	-	-	-	-	-	-	-	-	-	-	-	-	-	-	-			MAP3K13
ASGA0002985	1:55991469-55991469	A	intron_variant	MODIFIER	ORC3	ENSSSCG00000004306	Transcript	ENSSSCT00000004761.4	protein_coding	-	3/17	ENSSSCT00000004761.4:c.177+599C>A	-	-	-	-	-	-	rs81354275	-	1	-	HGNC	HGNC:8489	-	-	-	-	ENSSSCP00000004650	-	F1S0E8	UPI001236C678	-	-	Ensembl	-	-	-	-	-	-			TP63
ASGA0002985	1:55991469-55991469	A	intron_variant	MODIFIER	ORC3	ENSSSCG00000004306	Transcript	ENSSSCT00000037698.2	protein_coding	-	5/21	ENSSSCT00000037698.2:c.177+599C>A	-	-	-	-	-	-	rs81354275	-	1	-	HGNC	HGNC:8489	-	-	P1	-	ENSSSCP00000058251	-	A0A287BP12	UPI0002104D26	-	-	Ensembl	-	-	-	-	-	-			FGF12
ASGA0002985	1:55991469-55991469	A	intron_variant	MODIFIER	ORC3	100519878	Transcript	XM_003121290.6	protein_coding	-	3/19	XM_003121290.6:c.177+599C>A	-	-	-	-	-	-	rs81354275	-	1	-	EntrezGene	HGNC:8489	-	-	-	-	XP_003121338.5	-	-	-	-	-	RefSeq	-	-	-	-	-	-			RUBCN
ASGA0002985	1:55991469-55991469	A	intron_variant	MODIFIER	ORC3	100519878	Transcript	XM_021089812.1	protein_coding	-	3/19	XM_021089812.1:c.177+599C>A	-	-	-	-	-	-	rs81354275	-	1	-	EntrezGene	HGNC:8489	-	-	-	-	XP_020945471.1	-	-	-	-	-	RefSeq	-	-	-	-	-	-			SEMA5B
ASGA0002985	1:55991469-55991469	A	intron_variant	MODIFIER	ORC3	100519878	Transcript	XM_021089821.1	protein_coding	-	3/19	XM_021089821.1:c.18+599C>A	-	-	-	-	-	-	rs81354275	-	1	-	EntrezGene	HGNC:8489	-	-	-	-	XP_020945480.1	-	-	-	-	-	RefSeq	-	-	-	-	-	-			CD96
ASGA0002985	1:55991469-55991469	A	intron_variant	MODIFIER	ORC3	100519878	Transcript	XM_021089832.1	protein_coding	-	4/20	XM_021089832.1:c.18+599C>A	-	-	-	-	-	-	rs81354275	-	1	-	EntrezGene	HGNC:8489	-	-	-	-	XP_020945491.1	-	-	-	-	-	RefSeq	-	-	-	-	-	-			IFT57
ALGA0003751	1:58422166-58422166	A	intergenic_variant	MODIFIER	-	-	-	-	-	-	-	-	-	-	-	-	-	-	rs80853855	-	-	-	-	-	-	-	-	-	-	-	-	-	-	-	-	-	-	-	-	-	-			ROBO1
ASGA0003100	1:58469842-58469842	C	intergenic_variant	MODIFIER	-	-	-	-	-	-	-	-	-	-	-	-	-	-	rs80947594	-	-	-	-	-	-	-	-	-	-	-	-	-	-	-	-	-	-	-	-	-	-			ROBO2
ASGA0003102	1:58611902-58611902	G	intergenic_variant	MODIFIER	-	-	-	-	-	-	-	-	-	-	-	-	-	-	rs80873904	-	-	-	-	-	-	-	-	-	-	-	-	-	-	-	-	-	-	-	-	-	-			C21orf91
MARC0026746	1:58816367-58816367	A	intergenic_variant	MODIFIER	-	-	-	-	-	-	-	-	-	-	-	-	-	-	rs80831570	-	-	-	-	-	-	-	-	-	-	-	-	-	-	-	-	-	-	-	-	-	-			C13H21orf91
ALGA0003779	1:59007636-59007636	A	downstream_gene_variant	MODIFIER	-	ENSSSCG00000048181	Transcript	ENSSSCT00000084795.1	lncRNA	-	-	-	-	-	-	-	-	-	rs80990568	1124	-1	-	-	-	-	-	-	-	-	-	-	-	-	-	Ensembl	-	-	-	-	-	-			CHODL
ALGA0003788	1:59150583-59150583	A	intergenic_variant	MODIFIER	-	-	-	-	-	-	-	-	-	-	-	-	-	-	rs80924193	-	-	-	-	-	-	-	-	-	-	-	-	-	-	-	-	-	-	-	-	-	-			TIAM1
ALGA0003793	1:59181456-59181456	T	intergenic_variant	MODIFIER	-	-	-	-	-	-	-	-	-	-	-	-	-	-	rs80925936	-	-	-	-	-	-	-	-	-	-	-	-	-	-	-	-	-	-	-	-	-	-			DNAJC28
ALGA0003797	1:59255323-59255323	G	intergenic_variant	MODIFIER	-	-	-	-	-	-	-	-	-	-	-	-	-	-	rs80894890	-	-	-	-	-	-	-	-	-	-	-	-	-	-	-	-	-	-	-	-	-	-			SON
ALGA0003800	1:59299924-59299924	G	intergenic_variant	MODIFIER	-	-	-	-	-	-	-	-	-	-	-	-	-	-	rs80797858	-	-	-	-	-	-	-	-	-	-	-	-	-	-	-	-	-	-	-	-	-	-			SMIM11A
DRGA0000994	1:59374281-59374281	A	intergenic_variant	MODIFIER	-	-	-	-	-	-	-	-	-	-	-	-	-	-	rs80879076	-	-	-	-	-	-	-	-	-	-	-	-	-	-	-	-	-	-	-	-	-	-			RCAN1
ASGA0003137	1:59425153-59425153	G	intergenic_variant	MODIFIER	-	-	-	-	-	-	-	-	-	-	-	-	-	-	rs80850489	-	-	-	-	-	-	-	-	-	-	-	-	-	-	-	-	-	-	-	-	-	-			CBR3
MARC0027557	1:59735501-59735501	C	intergenic_variant	MODIFIER	-	-	-	-	-	-	-	-	-	-	-	-	-	-	rs80939169	-	-	-	-	-	-	-	-	-	-	-	-	-	-	-	-	-	-	-	-	-	-			TTC3
ALGA0003836	1:59896721-59896721	T	intergenic_variant	MODIFIER	-	-	-	-	-	-	-	-	-	-	-	-	-	-	rs80817849	-	-	-	-	-	-	-	-	-	-	-	-	-	-	-	-	-	-	-	-	-	-			BRWD1
ASGA0003156	1:59909951-59909951	C	intergenic_variant	MODIFIER	-	-	-	-	-	-	-	-	-	-	-	-	-	-	rs80924002	-	-	-	-	-	-	-	-	-	-	-	-	-	-	-	-	-	-	-	-	-	-			B3GALT5
ASGA0097137	1:60633111-60633111	C	intergenic_variant	MODIFIER	-	-	-	-	-	-	-	-	-	-	-	-	-	-	rs80969303	-	-	-	-	-	-	-	-	-	-	-	-	-	-	-	-	-	-	-	-	-	-			BACE2
ASGA0003166	1:60726592-60726592	G	intergenic_variant	MODIFIER	-	-	-	-	-	-	-	-	-	-	-	-	-	-	rs80931798	-	-	-	-	-	-	-	-	-	-	-	-	-	-	-	-	-	-	-	-	-	-			FAM3B
ALGA0003867	1:60861315-60861315	T	intron_variant	MODIFIER	EPHA7	ENSSSCG00000004336	Transcript	ENSSSCT00000058715.2	protein_coding	-	5/16	ENSSSCT00000058715.2:c.1324+20738G>A	-	-	-	-	-	-	rs80805012	-	-1	-	HGNC	HGNC:3390	-	-	P1	-	ENSSSCP00000053115	-	A0A287BAJ5,A0A4X1VK53	UPI0001C95A99	-	-	Ensembl	-	-	-	-	-	-			PWP2
ALGA0003867	1:60861315-60861315	T	intron_variant	MODIFIER	EPHA7	100154222	Transcript	XM_003480289.4	protein_coding	-	5/16	XM_003480289.4:c.1324+20738G>A	-	-	-	-	-	-	rs80805012	-	-1	-	EntrezGene	HGNC:3390	-	-	-	-	XP_003480337.1	-	-	-	-	-	RefSeq	-	-	-	-	-	-			GFRA2
ALGA0003867	1:60861315-60861315	T	intron_variant	MODIFIER	EPHA7	100154222	Transcript	XM_005659300.3	protein_coding	-	5/16	XM_005659300.3:c.1324+20738G>A	-	-	-	-	-	-	rs80805012	-	-1	-	EntrezGene	HGNC:3390	-	-	-	-	XP_005659357.1	-	-	-	-	-	RefSeq	-	-	-	-	-	-			DOK2
ALGA0003867	1:60861315-60861315	T	intron_variant	MODIFIER	EPHA7	100154222	Transcript	XM_005659302.3	protein_coding	-	5/16	XM_005659302.3:c.1324+20738G>A	-	-	-	-	-	-	rs80805012	-	-1	-	EntrezGene	HGNC:3390	-	-	-	-	XP_005659359.1	-	-	-	-	-	RefSeq	-	-	-	-	-	-			SLC39A14
ALGA0003867	1:60861315-60861315	T	intron_variant	MODIFIER	EPHA7	100154222	Transcript	XM_005659303.3	protein_coding	-	5/9	XM_005659303.3:c.1324+20738G>A	-	-	-	-	-	-	rs80805012	-	-1	-	EntrezGene	HGNC:3390	-	-	-	-	XP_005659360.1	-	-	-	-	-	RefSeq	-	-	-	-	-	-			BIN3
ALGA0003867	1:60861315-60861315	T	intron_variant	MODIFIER	EPHA7	100154222	Transcript	XM_021090161.1	protein_coding	-	5/16	XM_021090161.1:c.1324+20738G>A	-	-	-	-	-	-	rs80805012	-	-1	-	EntrezGene	HGNC:3390	-	-	-	-	XP_020945820.1	-	-	-	-	-	RefSeq	-	-	-	-	-	-			ADRA1A
ALGA0003867	1:60861315-60861315	T	intron_variant	MODIFIER	EPHA7	100154222	Transcript	XM_021090181.1	protein_coding	-	5/9	XM_021090181.1:c.1324+20738G>A	-	-	-	-	-	-	rs80805012	-	-1	-	EntrezGene	HGNC:3390	-	-	-	-	XP_020945840.1	-	-	-	-	-	RefSeq	-	-	-	-	-	-			SCARA3
MARC0026060	1:61430036-61430036	A	intergenic_variant	MODIFIER	-	-	-	-	-	-	-	-	-	-	-	-	-	-	rs80973578	-	-	-	-	-	-	-	-	-	-	-	-	-	-	-	-	-	-	-	-	-	-			EXTL3
ALGA0113051	1:61628730-61628730	C	intergenic_variant	MODIFIER	-	-	-	-	-	-	-	-	-	-	-	-	-	-	rs81341737	-	-	-	-	-	-	-	-	-	-	-	-	-	-	-	-	-	-	-	-	-	-			INTS9
ASGA0003185	1:61918654-61918654	C	intergenic_variant	MODIFIER	-	-	-	-	-	-	-	-	-	-	-	-	-	-	rs80906441	-	-	-	-	-	-	-	-	-	-	-	-	-	-	-	-	-	-	-	-	-	-			HMBOX1
ALGA0003892	1:61986232-61986232	T	intergenic_variant	MODIFIER	-	-	-	-	-	-	-	-	-	-	-	-	-	-	rs80842289	-	-	-	-	-	-	-	-	-	-	-	-	-	-	-	-	-	-	-	-	-	-			KIF13B
ALGA0003893	1:62019786-62019786	C	intergenic_variant	MODIFIER	-	-	-	-	-	-	-	-	-	-	-	-	-	-	rs80839093	-	-	-	-	-	-	-	-	-	-	-	-	-	-	-	-	-	-	-	-	-	-			PRSS55
DRGA0001062	1:62042316-62042316	T	intergenic_variant	MODIFIER	-	-	-	-	-	-	-	-	-	-	-	-	-	-	rs80998370	-	-	-	-	-	-	-	-	-	-	-	-	-	-	-	-	-	-	-	-	-	-			MSRA
ALGA0003900	1:62583607-62583607	G	intergenic_variant	MODIFIER	-	-	-	-	-	-	-	-	-	-	-	-	-	-	rs80977812	-	-	-	-	-	-	-	-	-	-	-	-	-	-	-	-	-	-	-	-	-	-			XKR6
ALGA0004002	1:65953598-65953598	A	intergenic_variant	MODIFIER	-	-	-	-	-	-	-	-	-	-	-	-	-	-	rs80915364	-	-	-	-	-	-	-	-	-	-	-	-	-	-	-	-	-	-	-	-	-	-			CLCN3
ALGA0004090	1:67360888-67360888	A	intron_variant	MODIFIER	ASCC3	ENSSSCG00000004358	Transcript	ENSSSCT00000004815.4	protein_coding	-	38/42	ENSSSCT00000004815.4:c.5190+2289C>T	-	-	-	-	-	-	rs80898039	-	-1	-	HGNC	HGNC:18697	-	-	A2	-	ENSSSCP00000004701	-	F1RYR4,A0A4X1VFA3	UPI000BADA019	-	-	Ensembl	-	-	-	-	-	-			NEK1
ALGA0004090	1:67360888-67360888	A	intron_variant	MODIFIER	ASCC3	ENSSSCG00000004358	Transcript	ENSSSCT00000004816.4	protein_coding	-	36/40	ENSSSCT00000004816.4:c.5658+2289C>T	-	-	-	-	-	-	rs80898039	-	-1	-	HGNC	HGNC:18697	-	-	A2	-	ENSSSCP00000004702	-	F1RYR3,A0A4X1VG90	UPI000BAD95AE	-	-	Ensembl	-	-	-	-	-	-			SH3RF1
ALGA0004090	1:67360888-67360888	A	intron_variant	MODIFIER	ASCC3	ENSSSCG00000004358	Transcript	ENSSSCT00000058812.2	protein_coding	-	37/41	ENSSSCT00000058812.2:c.5778+2289C>T	-	-	-	-	-	-	rs80898039	-	-1	-	HGNC	HGNC:18697	-	-	P5	-	ENSSSCP00000042651	-	A0A287AF88,A0A4X1VHY1	UPI0005A4EB21	-	-	Ensembl	-	-	-	-	-	-			SLC15A4
ALGA0004090	1:67360888-67360888	A	intron_variant	MODIFIER	ASCC3	100625273	Transcript	XM_021090356.1	protein_coding	-	37/41	XM_021090356.1:c.5778+2289C>T	-	-	-	-	-	-	rs80898039	-	-1	-	EntrezGene	HGNC:18697	-	-	-	-	XP_020946015.1	-	-	-	-	-	RefSeq	-	-	-	-	-	-			AACS
ALGA0004177	1:69419420-69419420	A	intergenic_variant	MODIFIER	-	-	-	-	-	-	-	-	-	-	-	-	-	-	rs81354721	-	-	-	-	-	-	-	-	-	-	-	-	-	-	-	-	-	-	-	-	-	-			MORN3
INRA0002837	1:69551184-69551184	A	intergenic_variant	MODIFIER	-	-	-	-	-	-	-	-	-	-	-	-	-	-	rs333122850	-	-	-	-	-	-	-	-	-	-	-	-	-	-	-	-	-	-	-	-	-	-			CCDC63
ALGA0004218	1:71407293-71407293	T	intron_variant	MODIFIER	LOC106508909	106508909	Transcript	XM_021084573.1	protein_coding	-	3/5	XM_021084573.1:c.*130-9051C>T	-	-	-	-	-	-	rs80940726	-	1	-	EntrezGene	-	-	-	-	-	XP_020940232.1	-	-	-	-	-	RefSeq	-	-	-	-	-	-			PRKAB1
ALGA0004245	1:71640684-71640684	G	upstream_gene_variant	MODIFIER	PREP	ENSSSCG00000004368	Transcript	ENSSSCT00000004829.4	protein_coding	-	-	-	-	-	-	-	-	-	rs80978162	3937	-1	-	HGNC	HGNC:9358	-	-	A2	-	ENSSSCP00000004715	-	F1RYQ0	UPI000BAD9BB5	-	-	Ensembl	-	-	-	-	-	-			KSR2
ALGA0004245	1:71640684-71640684	G	intron_variant	MODIFIER	PREP	ENSSSCG00000004368	Transcript	ENSSSCT00000039770.2	protein_coding	-	2/15	ENSSSCT00000039770.2:c.109-9885T>C	-	-	-	-	-	-	rs80978162	-	-1	-	HGNC	HGNC:9358	-	-	A2	-	ENSSSCP00000049709	-	A0A287AZX9	UPI000A2B7C89	-	-	Ensembl	-	-	-	-	-	-			TESC
ALGA0004245	1:71640684-71640684	G	upstream_gene_variant	MODIFIER	PREP	ENSSSCG00000004368	Transcript	ENSSSCT00000055168.2	protein_coding	-	-	-	-	-	-	-	-	-	rs80978162	4575	-1	-	HGNC	HGNC:9358	-	-	P5	-	ENSSSCP00000042303	-	A0A5S6HMR6	UPI001234E24F	-	-	Ensembl	-	-	-	-	-	-			SPPL3
ALGA0004245	1:71640684-71640684	G	upstream_gene_variant	MODIFIER	-	NM_001004050.1	Transcript	NM_001004050.1	cDNA	-	-	-	-	-	-	-	-	-	rs80978162	4539	-1	-	-	-	-	-	-	-	-	-	-	-	-	-	RefSeq	-	-	-	-	-	-			MVK
ALGA0004245	1:71640684-71640684	G	intron_variant	MODIFIER	PREP	445540	Transcript	XM_021083601.1	protein_coding	-	3/16	XM_021083601.1:c.109-9885T>C	-	-	-	-	-	-	rs80978162	-	-1	-	EntrezGene	HGNC:9358	-	-	-	-	XP_020939260.1	-	-	-	-	-	RefSeq	-	-	-	-	-	-			MYO1H
ALGA0004246	1:71658772-71658772	T	intron_variant	MODIFIER	PREP	ENSSSCG00000004368	Transcript	ENSSSCT00000039770.2	protein_coding	-	2/15	ENSSSCT00000039770.2:c.108+16019G>A	-	-	-	-	-	-	rs80871826	-	-1	-	HGNC	HGNC:9358	-	-	A2	-	ENSSSCP00000049709	-	A0A287AZX9	UPI000A2B7C89	-	-	Ensembl	-	-	-	-	-	-			SVOP
ALGA0004246	1:71658772-71658772	T	intron_variant	MODIFIER	PREP	445540	Transcript	XM_021083601.1	protein_coding	-	3/16	XM_021083601.1:c.108+16019G>A	-	-	-	-	-	-	rs80871826	-	-1	-	EntrezGene	HGNC:9358	-	-	-	-	XP_020939260.1	-	-	-	-	-	RefSeq	-	-	-	-	-	-			CORO1C
ASGA0003385	1:71667637-71667637	G	intron_variant	MODIFIER	PREP	ENSSSCG00000004368	Transcript	ENSSSCT00000039770.2	protein_coding	-	2/15	ENSSSCT00000039770.2:c.108+7154T>C	-	-	-	-	-	-	rs80984015	-	-1	-	HGNC	HGNC:9358	-	-	A2	-	ENSSSCP00000049709	-	A0A287AZX9	UPI000A2B7C89	-	-	Ensembl	-	-	-	-	-	-			TMEM211
ASGA0003385	1:71667637-71667637	G	intron_variant	MODIFIER	PREP	445540	Transcript	XM_021083601.1	protein_coding	-	3/16	XM_021083601.1:c.108+7154T>C	-	-	-	-	-	-	rs80984015	-	-1	-	EntrezGene	HGNC:9358	-	-	-	-	XP_020939260.1	-	-	-	-	-	RefSeq	-	-	-	-	-	-			KIAA1671
H3GA0001991	1:71675941-71675941	T	intron_variant	MODIFIER	PREP	ENSSSCG00000004368	Transcript	ENSSSCT00000039770.2	protein_coding	-	1/15	ENSSSCT00000039770.2:c.-85-958G>A	-	-	-	-	-	-	rs80871402	-	-1	-	HGNC	HGNC:9358	-	-	A2	-	ENSSSCP00000049709	-	A0A287AZX9	UPI000A2B7C89	-	-	Ensembl	-	-	-	-	-	-			MYO18B
H3GA0001991	1:71675941-71675941	T	intron_variant	MODIFIER	PREP	445540	Transcript	XM_021083601.1	protein_coding	-	2/16	XM_021083601.1:c.-85-958G>A	-	-	-	-	-	-	rs80871402	-	-1	-	EntrezGene	HGNC:9358	-	-	-	-	XP_020939260.1	-	-	-	-	-	RefSeq	-	-	-	-	-	-			ZNRF3
ASGA0003511	1:74776040-74776040	G	intron_variant,non_coding_transcript_variant	MODIFIER	-	ENSSSCG00000049152	Transcript	ENSSSCT00000078681.1	lncRNA	-	1/2	ENSSSCT00000078681.1:n.3833+2727A>G	-	-	-	-	-	-	rs80926100	-	1	-	-	-	-	-	-	-	-	-	-	-	-	-	Ensembl	-	-	-	-	-	-			EWSR1
MARC0022047	1:74839761-74839761	C	intergenic_variant	MODIFIER	-	-	-	-	-	-	-	-	-	-	-	-	-	-	rs80955772	-	-	-	-	-	-	-	-	-	-	-	-	-	-	-	-	-	-	-	-	-	-			MTMR3
H3GA0002135	1:78746469-78746469	A	intergenic_variant	MODIFIER	-	-	-	-	-	-	-	-	-	-	-	-	-	-	rs80836281	-	-	-	-	-	-	-	-	-	-	-	-	-	-	-	-	-	-	-	-	-	-			INPP5J
ALGA0004881	1:89076457-89076457	T	intergenic_variant	MODIFIER	-	-	-	-	-	-	-	-	-	-	-	-	-	-	rs80948357	-	-	-	-	-	-	-	-	-	-	-	-	-	-	-	-	-	-	-	-	-	-			SELENOM
ALGA0004886	1:89227027-89227027	A	intergenic_variant	MODIFIER	-	-	-	-	-	-	-	-	-	-	-	-	-	-	rs80894887	-	-	-	-	-	-	-	-	-	-	-	-	-	-	-	-	-	-	-	-	-	-			EIF4ENIF1
MARC0114221	1:102235929-102235929	T	intron_variant	MODIFIER	DCC	ENSSSCG00000040836	Transcript	ENSSSCT00000049593.2	protein_coding	-	1/28	ENSSSCT00000049593.2:c.26-30152C>T	-	-	-	-	-	-	rs80802721	-	1	-	HGNC	HGNC:2701	-	-	P1	-	ENSSSCP00000051467	-	A0A287B5A7	UPI000BAD6B32	-	-	Ensembl	-	-	-	-	-	-			SFI1
MARC0114221	1:102235929-102235929	T	intron_variant	MODIFIER	DCC	100152102	Transcript	XM_021073445.1	protein_coding	-	6/33	XM_021073445.1:c.92-30152C>T	-	-	-	-	-	-	rs80802721	-	1	-	EntrezGene	HGNC:2701	-	-	-	-	XP_020929104.1	-	-	-	-	-	RefSeq	-	-	-	-	-	-			GNAZ
MARC0114221	1:102235929-102235929	T	intron_variant	MODIFIER	DCC	100152102	Transcript	XM_021073448.1	protein_coding	-	5/32	XM_021073448.1:c.92-30152C>T	-	-	-	-	-	-	rs80802721	-	1	-	EntrezGene	HGNC:2701	-	-	-	-	XP_020929107.1	-	-	-	-	-	RefSeq	-	-	-	-	-	-			RSPH14
MARC0114221	1:102235929-102235929	T	intron_variant	MODIFIER	DCC	100152102	Transcript	XM_021073456.1	protein_coding	-	2/29	XM_021073456.1:c.92-30152C>T	-	-	-	-	-	-	rs80802721	-	1	-	EntrezGene	HGNC:2701	-	-	-	-	XP_020929115.1	-	-	-	-	-	RefSeq	-	-	-	-	-	-			RAB36
MARC0114221	1:102235929-102235929	T	intron_variant	MODIFIER	DCC	100152102	Transcript	XM_021073460.1	protein_coding	-	1/28	XM_021073460.1:c.92-30152C>T	-	-	-	-	-	-	rs80802721	-	1	-	EntrezGene	HGNC:2701	-	-	-	-	XP_020929119.1	-	-	-	-	-	RefSeq	-	-	-	-	-	-			SPECC1L
MARC0114221	1:102235929-102235929	T	intron_variant	MODIFIER	DCC	100152102	Transcript	XM_021073463.1	protein_coding	-	1/28	XM_021073463.1:c.92-30152C>T	-	-	-	-	-	-	rs80802721	-	1	-	EntrezGene	HGNC:2701	-	-	-	-	XP_020929122.1	-	-	-	-	-	RefSeq	-	-	-	-	-	-			UPB1
INRA0003607	1:105634678-105634678	T	intergenic_variant	MODIFIER	-	-	-	-	-	-	-	-	-	-	-	-	-	-	rs320630931	-	-	-	-	-	-	-	-	-	-	-	-	-	-	-	-	-	-	-	-	-	-			GGT5
WU_10.2_1_118612696	1:107648803-107648803	T	intron_variant	MODIFIER	TRIP4	ENSSSCG00000004552	Transcript	ENSSSCT00000005028.4	protein_coding	-	1/11	ENSSSCT00000005028.4:c.102-1868G>A	-	-	-	-	-	-	rs336207206	-	-1	-	HGNC	HGNC:12310	-	-	-	-	ENSSSCP00000004908	-	F1S0A8	UPI0010AFDABF	-	-	Ensembl	-	-	-	-	-	-			CABIN1
WU_10.2_1_118612696	1:107648803-107648803	T	intron_variant	MODIFIER	TRIP4	ENSSSCG00000004552	Transcript	ENSSSCT00000059350.2	protein_coding	-	1/12	ENSSSCT00000059350.2:c.306-1868G>A	-	-	-	-	-	-	rs336207206	-	-1	-	HGNC	HGNC:12310	-	-	P1	-	ENSSSCP00000038756	-	A0A287A486,A0A4X1U159	UPI000BADA38D	-	-	Ensembl	-	-	-	-	-	-			LRRC74B
WU_10.2_1_118612696	1:107648803-107648803	T	intron_variant	MODIFIER	TRIP4	ENSSSCG00000004552	Transcript	ENSSSCT00000078372.1	protein_coding	-	1/11	ENSSSCT00000078372.1:c.102-1868G>A	-	-	-	-	-	-	rs336207206	-	-1	-	HGNC	HGNC:12310	-	-	-	-	ENSSSCP00000072888	-	A0A5G2RKY6	UPI00123469A6	-	-	Ensembl	-	-	-	-	-	-			P2RX6
WU_10.2_1_118612696	1:107648803-107648803	T	intron_variant	MODIFIER	TRIP4	100153164	Transcript	XM_021093813.1	protein_coding	-	1/12	XM_021093813.1:c.102-1868G>A	-	-	-	-	-	-	rs336207206	-	-1	-	EntrezGene	HGNC:12310	-	-	-	-	XP_020949472.1	-	-	-	-	-	RefSeq	-	-	-	-	-	-			RYR2
WU_10.2_1_118612696	1:107648803-107648803	T	intron_variant	MODIFIER	TRIP4	100153164	Transcript	XM_021093818.1	protein_coding	-	1/11	XM_021093818.1:c.102-1868G>A	-	-	-	-	-	-	rs336207206	-	-1	-	EntrezGene	HGNC:12310	-	-	-	-	XP_020949477.1	-	-	-	-	-	RefSeq	-	-	-	-	-	-			DISC1
WU_10.2_1_118612696	1:107648803-107648803	T	intron_variant	MODIFIER	TRIP4	100153164	Transcript	XM_021093826.1	protein_coding	-	1/11	XM_021093826.1:c.102-1868G>A	-	-	-	-	-	-	rs336207206	-	-1	-	EntrezGene	HGNC:12310	-	-	-	-	XP_020949485.1	-	-	-	-	-	RefSeq	-	-	-	-	-	-			CSGALNACT2
WU_10.2_1_118612696	1:107648803-107648803	T	intron_variant	MODIFIER	TRIP4	100153164	Transcript	XM_021093833.1	protein_coding	-	2/13	XM_021093833.1:c.-265-1868G>A	-	-	-	-	-	-	rs336207206	-	-1	-	EntrezGene	HGNC:12310	-	-	-	-	XP_020949492.1	-	-	-	-	-	RefSeq	-	-	-	-	-	-			CTNNA3
ALGA0005548	1:111555023-111555023	C	intron_variant	MODIFIER	ICE2	ENSSSCG00000004577	Transcript	ENSSSCT00000005056.4	protein_coding	-	11/12	ENSSSCT00000005056.4:c.2313-145T>C	-	-	-	-	-	-	rs81355642	-	1	-	HGNC	HGNC:29885	-	-	A2	-	ENSSSCP00000004934	-	F1S074	UPI00123648D5	-	-	Ensembl	-	-	-	-	-	-			GRID1
ALGA0005548	1:111555023-111555023	C	intron_variant	MODIFIER	ICE2	ENSSSCG00000004577	Transcript	ENSSSCT00000025364.2	protein_coding	-	14/14	ENSSSCT00000025364.2:c.2552+3897T>C	-	-	-	-	-	-	rs81355642	-	1	-	HGNC	HGNC:29885	-	-	-	-	ENSSSCP00000019285	-	I3L5I6,A0A4X1TT26	UPI000BADA8D7	-	-	Ensembl	-	-	-	-	-	-			PTPN20
ALGA0005548	1:111555023-111555023	C	intron_variant	MODIFIER	ICE2	ENSSSCG00000004577	Transcript	ENSSSCT00000047039.2	protein_coding	-	15/16	ENSSSCT00000047039.2:c.2595-145T>C	-	-	-	-	-	-	rs81355642	-	1	-	HGNC	HGNC:29885	-	-	P5	-	ENSSSCP00000036239	-	A0A286ZX88,A0A4X1TT01	UPI0006B2161C	-	-	Ensembl	-	-	-	-	-	-			FRMPD2
ALGA0005548	1:111555023-111555023	C	intron_variant	MODIFIER	ICE2	ENSSSCG00000004577	Transcript	ENSSSCT00000084527.1	protein_coding	-	15/16	ENSSSCT00000084527.1:c.2565-145T>C	-	-	-	-	-	-	rs81355642	-	1	-	HGNC	HGNC:29885	-	-	-	-	ENSSSCP00000062050	-	A0A5G2QD45	UPI0001C95CB9	-	-	Ensembl	-	-	-	-	-	-			MSMB
ALGA0005548	1:111555023-111555023	C	intron_variant	MODIFIER	ICE2	100157039	Transcript	XM_001925575.6	protein_coding	-	14/15	XM_001925575.6:c.2553-145T>C	-	-	-	-	-	-	rs81355642	-	1	-	EntrezGene	HGNC:29885	-	-	-	-	XP_001925610.2	-	-	-	-	-	RefSeq	-	-	-	-	-	-			PCDH15
ALGA0005548	1:111555023-111555023	C	intron_variant	MODIFIER	ICE2	100157039	Transcript	XM_013992913.2	protein_coding	-	15/16	XM_013992913.2:c.2595-145T>C	-	-	-	-	-	-	rs81355642	-	1	-	EntrezGene	HGNC:29885	-	-	-	-	XP_013848367.1	-	-	-	-	-	RefSeq	-	-	-	-	-	-			PRKG1
ALGA0005548	1:111555023-111555023	C	intron_variant	MODIFIER	ICE2	100157039	Transcript	XM_021094409.1	protein_coding	-	16/17	XM_021094409.1:c.2595-145T>C	-	-	-	-	-	-	rs81355642	-	1	-	EntrezGene	HGNC:29885	-	-	-	-	XP_020950068.1	-	-	-	-	-	RefSeq	-	-	-	-	-	-			STAMBPL1
ALGA0005548	1:111555023-111555023	C	intron_variant	MODIFIER	ICE2	100157039	Transcript	XM_021094415.1	protein_coding	-	15/16	XM_021094415.1:c.2595-145T>C	-	-	-	-	-	-	rs81355642	-	1	-	EntrezGene	HGNC:29885	-	-	-	-	XP_020950074.1	-	-	-	-	-	RefSeq	-	-	-	-	-	-			BTAF1
ALGA0005548	1:111555023-111555023	C	intron_variant	MODIFIER	ICE2	100157039	Transcript	XM_021094419.1	protein_coding	-	15/16	XM_021094419.1:c.2595-145T>C	-	-	-	-	-	-	rs81355642	-	1	-	EntrezGene	HGNC:29885	-	-	-	-	XP_020950078.1	-	-	-	-	-	RefSeq	-	-	-	-	-	-			CPEB3
ALGA0005548	1:111555023-111555023	C	intron_variant	MODIFIER	ICE2	100157039	Transcript	XM_021094430.1	protein_coding	-	14/15	XM_021094430.1:c.2196-145T>C	-	-	-	-	-	-	rs81355642	-	1	-	EntrezGene	HGNC:29885	-	-	-	-	XP_020950089.1	-	-	-	-	-	RefSeq	-	-	-	-	-	-			IDE
ALGA0005548	1:111555023-111555023	C	intron_variant	MODIFIER	ICE2	100157039	Transcript	XM_021094439.1	protein_coding	-	14/15	XM_021094439.1:c.2154-145T>C	-	-	-	-	-	-	rs81355642	-	1	-	EntrezGene	HGNC:29885	-	-	-	-	XP_020950098.1	-	-	-	-	-	RefSeq	-	-	-	-	-	-			EXOC6
ALGA0005548	1:111555023-111555023	C	intron_variant	MODIFIER	ICE2	100157039	Transcript	XM_021094453.1	protein_coding	-	11/12	XM_021094453.1:c.2085-145T>C	-	-	-	-	-	-	rs81355642	-	1	-	EntrezGene	HGNC:29885	-	-	-	-	XP_020950112.1	-	-	-	-	-	RefSeq	-	-	-	-	-	-			PDLIM1
ALGA0005548	1:111555023-111555023	C	intron_variant,non_coding_transcript_variant	MODIFIER	ICE2	100157039	Transcript	XR_002344664.1	misc_RNA	-	16/17	XR_002344664.1:n.3127-145T>C	-	-	-	-	-	-	rs81355642	-	1	-	EntrezGene	HGNC:29885	-	-	-	-	-	-	-	-	-	-	RefSeq	-	-	-	-	-	-			ARMH3
ALGA0005548	1:111555023-111555023	C	downstream_gene_variant	MODIFIER	ICE2	100157039	Transcript	XR_002344666.1	misc_RNA	-	-	-	-	-	-	-	-	-	rs81355642	3897	1	-	EntrezGene	HGNC:29885	-	-	-	-	-	-	-	-	-	-	RefSeq	-	-	-	-	-	-			C14H10orf76
H3GA0002574	1:112194950-112194950	G	intron_variant,non_coding_transcript_variant	MODIFIER	-	ENSSSCG00000048340	Transcript	ENSSSCT00000073443.1	lncRNA	-	5/5	ENSSSCT00000073443.1:n.410+59134T>G	-	-	-	-	-	-	rs80802190	-	1	-	-	-	-	-	-	-	-	-	-	-	-	-	Ensembl	-	-	-	-	-	-			AS3MT
MARC0030657	1:112210717-112210717	G	intron_variant,non_coding_transcript_variant	MODIFIER	-	ENSSSCG00000048340	Transcript	ENSSSCT00000073443.1	lncRNA	-	5/5	ENSSSCT00000073443.1:n.410+74901A>G	-	-	-	-	-	-	rs81225364	-	1	-	-	-	-	-	-	-	-	-	-	-	-	-	Ensembl	-	-	-	-	-	-			BORCS7
H3GA0002682	1:122909530-122909530	C	intron_variant	MODIFIER	CEP152	ENSSSCG00000004657	Transcript	ENSSSCT00000005142.3	protein_coding	-	9/26	ENSSSCT00000005142.3:c.1192-645T>C	-	-	-	-	-	-	rs80970028	-	1	-	HGNC	HGNC:29298	-	-	-	-	ENSSSCP00000005016	-	F1SQG1	UPI0006B234AD	-	-	Ensembl	-	-	-	-	-	-			SMC3
H3GA0002682	1:122909530-122909530	C	intron_variant	MODIFIER	CEP152	ENSSSCG00000004657	Transcript	ENSSSCT00000029380.3	protein_coding	-	9/25	ENSSSCT00000029380.3:c.1195-645T>C	-	-	-	-	-	-	rs80970028	-	1	-	HGNC	HGNC:29298	-	-	-	-	ENSSSCP00000023268	-	I3LGS4	UPI0006B18005	-	-	Ensembl	-	-	-	-	-	-			GPAM
H3GA0002682	1:122909530-122909530	C	intron_variant	MODIFIER	CEP152	ENSSSCG00000004657	Transcript	ENSSSCT00000063098.2	protein_coding	-	8/25	ENSSSCT00000063098.2:c.916-645T>C	-	-	-	-	-	-	rs80970028	-	1	-	HGNC	HGNC:29298	-	-	-	-	ENSSSCP00000047842	-	A0A287AVF1	UPI0003AE999C	-	-	Ensembl	-	-	-	-	-	-			ATRNL1
H3GA0002682	1:122909530-122909530	C	intron_variant	MODIFIER	CEP152	100152345	Transcript	XM_005659632.3	protein_coding	-	9/26	XM_005659632.3:c.1195-645T>C	-	-	-	-	-	-	rs80970028	-	1	-	EntrezGene	HGNC:29298	-	-	-	-	XP_005659689.1	-	-	-	-	-	RefSeq	-	-	-	-	-	-			PNLIPRP3
H3GA0002682	1:122909530-122909530	C	intron_variant	MODIFIER	CEP152	100152345	Transcript	XM_005659633.3	protein_coding	-	9/26	XM_005659633.3:c.1195-645T>C	-	-	-	-	-	-	rs80970028	-	1	-	EntrezGene	HGNC:29298	-	-	-	-	XP_005659690.1	-	-	-	-	-	RefSeq	-	-	-	-	-	-			ATE1
H3GA0002682	1:122909530-122909530	C	intron_variant	MODIFIER	CEP152	100152345	Transcript	XM_005659635.3	protein_coding	-	8/25	XM_005659635.3:c.916-645T>C	-	-	-	-	-	-	rs80970028	-	1	-	EntrezGene	HGNC:29298	-	-	-	-	XP_005659692.1	-	-	-	-	-	RefSeq	-	-	-	-	-	-			FGFR2
H3GA0002682	1:122909530-122909530	C	intron_variant	MODIFIER	CEP152	100152345	Transcript	XM_013993030.2	protein_coding	-	9/26	XM_013993030.2:c.1192-645T>C	-	-	-	-	-	-	rs80970028	-	1	-	EntrezGene	HGNC:29298	-	-	-	-	XP_013848484.1	-	-	-	-	-	RefSeq	-	-	-	-	-	-			FAM53B
H3GA0002682	1:122909530-122909530	C	intron_variant	MODIFIER	CEP152	100152345	Transcript	XM_013993031.2	protein_coding	-	9/25	XM_013993031.2:c.1195-645T>C	-	-	-	-	-	-	rs80970028	-	1	-	EntrezGene	HGNC:29298	-	-	-	-	XP_013848485.1	-	-	-	-	-	RefSeq	-	-	-	-	-	-			EDRF1
H3GA0002682	1:122909530-122909530	C	intron_variant	MODIFIER	CEP152	100152345	Transcript	XM_013993032.2	protein_coding	-	9/27	XM_013993032.2:c.1195-645T>C	-	-	-	-	-	-	rs80970028	-	1	-	EntrezGene	HGNC:29298	-	-	-	-	XP_013848486.1	-	-	-	-	-	RefSeq	-	-	-	-	-	-			UROS
H3GA0002682	1:122909530-122909530	C	intron_variant	MODIFIER	CEP152	100152345	Transcript	XM_013993033.2	protein_coding	-	9/25	XM_013993033.2:c.1192-645T>C	-	-	-	-	-	-	rs80970028	-	1	-	EntrezGene	HGNC:29298	-	-	-	-	XP_013848487.1	-	-	-	-	-	RefSeq	-	-	-	-	-	-			PTPRE
H3GA0002682	1:122909530-122909530	C	intron_variant	MODIFIER	CEP152	100152345	Transcript	XM_021095942.1	protein_coding	-	9/26	XM_021095942.1:c.1156-645T>C	-	-	-	-	-	-	rs80970028	-	1	-	EntrezGene	HGNC:29298	-	-	-	-	XP_020951601.1	-	-	-	-	-	RefSeq	-	-	-	-	-	-			MGMT
H3GA0002682	1:122909530-122909530	C	intron_variant	MODIFIER	CEP152	100152345	Transcript	XM_021095980.1	protein_coding	-	9/27	XM_021095980.1:c.1192-645T>C	-	-	-	-	-	-	rs80970028	-	1	-	EntrezGene	HGNC:29298	-	-	-	-	XP_020951639.1	-	-	-	-	-	RefSeq	-	-	-	-	-	-			GLRX3
ALGA0005871	1:125319649-125319649	A	intergenic_variant	MODIFIER	-	-	-	-	-	-	-	-	-	-	-	-	-	-	rs80930920	-	-	-	-	-	-	-	-	-	-	-	-	-	-	-	-	-	-	-	-	-	-			MBD5
ALGA0005905	1:125774728-125774728	G	intergenic_variant	MODIFIER	-	-	-	-	-	-	-	-	-	-	-	-	-	-	rs81348414	-	-	-	-	-	-	-	-	-	-	-	-	-	-	-	-	-	-	-	-	-	-			MGAT5
ASGA0004574	1:131447528-131447528	C	intron_variant	MODIFIER	GPR176	ENSSSCG00000004787	Transcript	ENSSSCT00000057996.2	protein_coding	-	3/4	ENSSSCT00000057996.2:c.173-38549T>C	-	-	-	-	-	-	rs80791265	-	1	-	HGNC	HGNC:32370	-	-	P1	-	ENSSSCP00000031598	-	A0A286ZJ96,A0A4X1UPL8	UPI0002104DA6	-	-	Ensembl	-	-	-	-	-	-			DPP10
ASGA0004574	1:131447528-131447528	C	intron_variant	MODIFIER	GPR176	ENSSSCG00000004787	Transcript	ENSSSCT00000069289.1	protein_coding	-	2/4	ENSSSCT00000069289.1:c.-52-29939T>C	-	-	-	-	-	-	rs80791265	-	1	-	HGNC	HGNC:32370	-	-	-	-	ENSSSCP00000068941	-	A0A5G2RDT1	UPI0012356463	-	-	Ensembl	-	-	-	-	-	-			PROC
ASGA0004574	1:131447528-131447528	C	intron_variant	MODIFIER	GPR176	ENSSSCG00000004787	Transcript	ENSSSCT00000070658.1	protein_coding	-	3/5	ENSSSCT00000070658.1:c.173-38549T>C	-	-	-	-	-	-	rs80791265	-	1	-	HGNC	HGNC:32370	-	-	-	-	ENSSSCP00000064014	-	A0A5G2QPK9,A0A4X1URF3	UPI000A2B86DA	-	-	Ensembl	-	-	-	-	-	-			BIN1
ASGA0004574	1:131447528-131447528	C	intron_variant	MODIFIER	GPR176	100153995	Transcript	XM_013993189.2	protein_coding	-	1/2	XM_013993189.2:c.-8-38549T>C	-	-	-	-	-	-	rs80791265	-	1	-	EntrezGene	HGNC:32370	-	-	-	-	XP_013848643.1	-	-	-	-	-	RefSeq	-	-	-	-	-	-			GYPC
ASGA0004574	1:131447528-131447528	C	intron_variant	MODIFIER	GPR176	100153995	Transcript	XM_021097914.1	protein_coding	-	3/4	XM_021097914.1:c.173-38549T>C	-	-	-	-	-	-	rs80791265	-	1	-	EntrezGene	HGNC:32370	-	-	-	-	XP_020953573.1	-	-	-	-	-	RefSeq	-	-	-	-	-	-			CSMD1
ASGA0004574	1:131447528-131447528	C	intron_variant	MODIFIER	GPR176	100153995	Transcript	XM_021097918.1	protein_coding	-	2/3	XM_021097918.1:c.173-38549T>C	-	-	-	-	-	-	rs80791265	-	1	-	EntrezGene	HGNC:32370	-	-	-	-	XP_020953577.1	-	-	-	-	-	RefSeq	-	-	-	-	-	-			UNC5D
ASGA0004574	1:131447528-131447528	C	intron_variant	MODIFIER	GPR176	100153995	Transcript	XM_021097921.1	protein_coding	-	2/3	XM_021097921.1:c.173-38549T>C	-	-	-	-	-	-	rs80791265	-	1	-	EntrezGene	HGNC:32370	-	-	-	-	XP_020953580.1	-	-	-	-	-	RefSeq	-	-	-	-	-	-			NRG1
ASGA0004574	1:131447528-131447528	C	intron_variant	MODIFIER	GPR176	100153995	Transcript	XM_021097925.1	protein_coding	-	3/5	XM_021097925.1:c.173-38549T>C	-	-	-	-	-	-	rs80791265	-	1	-	EntrezGene	HGNC:32370	-	-	-	-	XP_020953584.1	-	-	-	-	-	RefSeq	-	-	-	-	-	-			LOC102162293
ALGA0106213	1:138883231-138883231	T	intron_variant	MODIFIER	ADAMTS17	ENSSSCG00000038452	Transcript	ENSSSCT00000041094.2	protein_coding	-	7/22	ENSSSCT00000041094.2:c.1444+14745G>A	-	-	-	-	-	-	rs81333677	-	-1	-	HGNC	HGNC:17109	-	-	A2	-	ENSSSCP00000042131	-	A0A287ADP0	UPI000BAD8F41	-	-	Ensembl	-	-	-	-	-	-			CERS6
ALGA0106213	1:138883231-138883231	T	intron_variant	MODIFIER	ADAMTS17	ENSSSCG00000038452	Transcript	ENSSSCT00000042568.2	protein_coding	-	7/23	ENSSSCT00000042568.2:c.1444+14745G>A	-	-	-	-	-	-	rs81333677	-	-1	-	HGNC	HGNC:17109	-	-	P5	-	ENSSSCP00000039975	-	A0A287A7W6	UPI000BAD6343	-	-	Ensembl	-	-	-	-	-	-			UBR3
ALGA0106213	1:138883231-138883231	T	intron_variant	MODIFIER	ADAMTS17	ENSSSCG00000038452	Transcript	ENSSSCT00000067496.1	protein_coding	-	7/21	ENSSSCT00000067496.1:c.1057+14745G>A	-	-	-	-	-	-	rs81333677	-	-1	-	HGNC	HGNC:17109	-	-	A2	-	ENSSSCP00000071979	-	A0A5G2RJF6	UPI001236E6B6	-	-	Ensembl	-	-	-	-	-	-			CYBRD1
ALGA0106213	1:138883231-138883231	T	intron_variant	MODIFIER	ADAMTS17	102160867	Transcript	XM_005659785.3	protein_coding	-	7/22	XM_005659785.3:c.1057+14745G>A	-	-	-	-	-	-	rs81333677	-	-1	-	EntrezGene	HGNC:17109	-	-	-	-	XP_005659842.2	-	-	-	-	-	RefSeq	-	-	-	-	-	-			SP3
ALGA0106213	1:138883231-138883231	T	intron_variant	MODIFIER	ADAMTS17	102160867	Transcript	XM_013993230.2	protein_coding	-	7/23	XM_013993230.2:c.1057+14745G>A	-	-	-	-	-	-	rs81333677	-	-1	-	EntrezGene	HGNC:17109	-	-	-	-	XP_013848684.2	-	-	-	-	-	RefSeq	-	-	-	-	-	-			ZNF385B
ALGA0106213	1:138883231-138883231	T	intron_variant	MODIFIER	ADAMTS17	102160867	Transcript	XM_021098449.1	protein_coding	-	7/23	XM_021098449.1:c.1057+14745G>A	-	-	-	-	-	-	rs81333677	-	-1	-	EntrezGene	HGNC:17109	-	-	-	-	XP_020954108.1	-	-	-	-	-	RefSeq	-	-	-	-	-	-			FAM171B
ALGA0106213	1:138883231-138883231	T	intron_variant	MODIFIER	ADAMTS17	102160867	Transcript	XM_021098456.1	protein_coding	-	7/22	XM_021098456.1:c.1057+14745G>A	-	-	-	-	-	-	rs81333677	-	-1	-	EntrezGene	HGNC:17109	-	-	-	-	XP_020954115.1	-	-	-	-	-	RefSeq	-	-	-	-	-	-			ANKRD44
MARC0010520	1:141616090-141616090	G	intron_variant	MODIFIER	-	ENSSSCG00000004830	Transcript	ENSSSCT00000040646.2	protein_coding	-	2/21	ENSSSCT00000040646.2:c.-1080-385A>G	-	-	-	-	-	-	rs80841134	-	1	-	-	-	-	-	P1	-	ENSSSCP00000054908	-	A0A287BEF4	UPI001234EB73	-	-	Ensembl	-	-	-	-	-	-			SATB2
MARC0010520	1:141616090-141616090	G	intron_variant	MODIFIER	ATP10A	100158162	Transcript	XM_021098662.1	protein_coding	-	2/20	XM_021098662.1:c.670-385A>G	-	-	-	-	-	-	rs80841134	-	1	-	EntrezGene	-	-	-	-	-	XP_020954321.1	-	-	-	-	-	RefSeq	-	-	-	-	-	-			PARD3B
ASGA0004740	1:143601307-143601307	A	upstream_gene_variant	MODIFIER	-	ENSSSCG00000038208	Transcript	ENSSSCT00000063177.2	lncRNA	-	-	-	-	-	-	-	-	-	rs80877851	3697	1	-	-	-	-	-	-	-	-	-	-	-	-	-	Ensembl	-	-	-	-	-	-			CPS1
ASGA0004740	1:143601307-143601307	A	non_coding_transcript_exon_variant	MODIFIER	-	ENSSSCG00000048005	Transcript	ENSSSCT00000079280.1	lncRNA	2/2	-	ENSSSCT00000079280.1:n.1345C>T	-	1345	-	-	-	-	rs80877851	-	-1	-	-	-	-	-	-	-	-	-	-	-	-	-	Ensembl	-	-	-	-	-	-			ERBB4
ASGA0004740	1:143601307-143601307	A	non_coding_transcript_exon_variant	MODIFIER	-	ENSSSCG00000048005	Transcript	ENSSSCT00000090186.1	lncRNA	2/2	-	ENSSSCT00000090186.1:n.1342C>T	-	1342	-	-	-	-	rs80877851	-	-1	-	-	-	-	-	-	-	-	-	-	-	-	-	Ensembl	-	-	-	-	-	-			MARCHF4
ALGA0006411	1:148681430-148681430	C	intron_variant,non_coding_transcript_variant	MODIFIER	-	ENSSSCG00000041065	Transcript	ENSSSCT00000086654.1	lncRNA	-	2/2	ENSSSCT00000086654.1:n.529+2971T>C	-	-	-	-	-	-	rs81349025	-	1	-	-	-	-	-	-	-	-	-	-	-	-	-	Ensembl	-	-	-	-	-	-			MARCH4
ALGA0006411	1:148681430-148681430	C	intron_variant,non_coding_transcript_variant	MODIFIER	-	ENSSSCG00000041065	Transcript	ENSSSCT00000089681.1	lncRNA	-	2/3	ENSSSCT00000089681.1:n.530-905T>C	-	-	-	-	-	-	rs81349025	-	1	-	-	-	-	-	-	-	-	-	-	-	-	-	Ensembl	-	-	-	-	-	-			LOC100515345
ASGA0004896	1:149573916-149573916	C	intron_variant	MODIFIER	CNDP2	ENSSSCG00000004870	Transcript	ENSSSCT00000005376.3	protein_coding	-	5/12	ENSSSCT00000005376.3:c.367+661A>G	-	-	-	-	-	-	rs81349072	-	-1	-	HGNC	HGNC:24437	-	-	P1	-	ENSSSCP00000005241	-	F1SNL7,A0A4X1U2W5	UPI0001C96323	-	-	Ensembl	-	-	-	-	-	-			EPHA4
ASGA0004896	1:149573916-149573916	C	intron_variant	MODIFIER	CNDP2	ENSSSCG00000004870	Transcript	ENSSSCT00000044108.2	protein_coding	-	4/10	ENSSSCT00000044108.2:c.205-2411A>G	-	-	-	-	-	-	rs81349072	-	-1	-	HGNC	HGNC:24437	-	-	-	-	ENSSSCP00000057508	-	A0A287BM62,A0A4X1U2X2	UPI0001E8674B	-	-	Ensembl	-	-	-	-	-	-			ARMC9
ASGA0004896	1:149573916-149573916	C	intron_variant,non_coding_transcript_variant	MODIFIER	-	NM_001243707.1	Transcript	NM_001243707.1	cDNA	-	4/11	NM_001243707.1:n.615+661A>G	-	-	-	-	-	-	rs81349072	-	-1	-	-	-	-	-	-	-	-	-	-	-	-	-	RefSeq	-	-	-	-	-	-			SAG
ASGA0004896	1:149573916-149573916	C	intron_variant	MODIFIER	CNDP2	100158127	Transcript	XM_005659817.3	protein_coding	-	4/11	XM_005659817.3:c.367+661A>G	-	-	-	-	-	-	rs81349072	-	-1	-	EntrezGene	HGNC:24437	-	-	-	-	XP_005659874.1	-	-	-	-	-	RefSeq	-	-	-	-	-	-			DGKD
ASGA0004896	1:149573916-149573916	C	intron_variant	MODIFIER	CNDP2	100158127	Transcript	XM_021062445.1	protein_coding	-	4/11	XM_021062445.1:c.367+661A>G	-	-	-	-	-	-	rs81349072	-	-1	-	EntrezGene	HGNC:24437	-	-	-	-	XP_020918104.1	-	-	-	-	-	RefSeq	-	-	-	-	-	-			HDAC4
ASGA0004896	1:149573916-149573916	C	intron_variant	MODIFIER	CNDP2	100158127	Transcript	XM_021062486.1	protein_coding	-	4/11	XM_021062486.1:c.367+661A>G	-	-	-	-	-	-	rs81349072	-	-1	-	EntrezGene	HGNC:24437	-	-	-	-	XP_020918145.1	-	-	-	-	-	RefSeq	-	-	-	-	-	-			HDLBP
H3GA0003104	1:159619891-159619891	G	intron_variant,non_coding_transcript_variant	MODIFIER	-	ENSSSCG00000034988	Transcript	ENSSSCT00000080171.1	lncRNA	-	1/8	ENSSSCT00000080171.1:n.118+164A>G	-	-	-	-	-	-	rs80861000	-	1	-	-	-	-	-	-	-	-	-	-	-	-	-	Ensembl	-	-	-	-	-	-			CTNND2
WU_10.2_1_177662261	1:160028398-160028398	A	upstream_gene_variant	MODIFIER	CDH20	ENSSSCG00000004903	Transcript	ENSSSCT00000005409.4	protein_coding	-	-	-	-	-	-	-	-	-	rs332055952	3410	-1	-	HGNC	HGNC:1760	-	-	P1	-	ENSSSCP00000005274	-	F1SMU4,A0A4X1TLN2	UPI0001C9636F	-	-	Ensembl	-	-	-	-	-	-			FBXL7
WU_10.2_1_177662261	1:160028398-160028398	A	upstream_gene_variant	MODIFIER	CDH20	100522414	Transcript	XM_013993290.2	protein_coding	-	-	-	-	-	-	-	-	-	rs332055952	3413	-1	-	EntrezGene	HGNC:1760	-	-	-	-	XP_013848744.2	-	-	-	-	-	RefSeq	-	-	-	-	-	-			MYO10
ALGA0006725	1:163382446-163382446	G	intron_variant	MODIFIER	IGDCC4	ENSSSCG00000004931	Transcript	ENSSSCT00000005442.4	protein_coding	-	2/13	ENSSSCT00000005442.4:c.409+6261T>C	-	-	-	-	-	-	rs80864027	-	-1	-	HGNC	HGNC:13770	-	-	-	-	ENSSSCP00000005307	-	F1SJL0	UPI000A2B2D6F	-	-	Ensembl	-	-	-	-	-	-			DROSHA
ALGA0006725	1:163382446-163382446	G	intron_variant	MODIFIER	IGDCC4	ENSSSCG00000004931	Transcript	ENSSSCT00000057855.2	protein_coding	-	21/32	ENSSSCT00000057855.2:c.3814+6261T>C	-	-	-	-	-	-	rs80864027	-	-1	-	HGNC	HGNC:13770	-	-	P1	-	ENSSSCP00000056801	-	A0A287BK77	UPI0012366E42	-	-	Ensembl	-	-	-	-	-	-			PDZD2
ALGA0006725	1:163382446-163382446	G	intron_variant	MODIFIER	IGDCC3	100737193	Transcript	XM_013993298.2	protein_coding	-	1/12	XM_013993298.2:c.409+6261T>C	-	-	-	-	-	-	rs80864027	-	-1	-	EntrezGene	-	-	-	-	-	XP_013848752.2	-	-	-	-	-	RefSeq	-	-	-	-	-	-			ADAMTS12
ALGA0006725	1:163382446-163382446	G	intron_variant	MODIFIER	IGDCC3	100737193	Transcript	XM_021100139.1	protein_coding	-	2/13	XM_021100139.1:c.406+6261T>C	-	-	-	-	-	-	rs80864027	-	-1	-	EntrezGene	-	-	-	-	-	XP_020955798.1	-	-	-	-	-	RefSeq	-	-	-	-	-	-			RAI14
ALGA0006725	1:163382446-163382446	G	intron_variant	MODIFIER	IGDCC3	100737193	Transcript	XM_021100143.1	protein_coding	-	2/13	XM_021100143.1:c.121+6261T>C	-	-	-	-	-	-	rs80864027	-	-1	-	EntrezGene	-	-	-	-	-	XP_020955802.1	-	-	-	-	-	RefSeq	-	-	-	-	-	-			BRIX1
ALGA0006725	1:163382446-163382446	G	intron_variant	MODIFIER	IGDCC3	100737193	Transcript	XM_021100146.1	protein_coding	-	1/13	XM_021100146.1:c.-37+6261T>C	-	-	-	-	-	-	rs80864027	-	-1	-	EntrezGene	-	-	-	-	-	XP_020955805.1	-	-	-	-	-	RefSeq	-	-	-	-	-	-			TTC23L
H3GA0003282	1:167519126-167519126	T	upstream_gene_variant	MODIFIER	-	ENSSSCG00000045133	Transcript	ENSSSCT00000067238.1	lncRNA	-	-	-	-	-	-	-	-	-	rs80927063	3340	-1	-	-	-	-	-	-	-	-	-	-	-	-	-	Ensembl	-	-	-	-	-	-			DNAJC21
H3GA0003282	1:167519126-167519126	T	upstream_gene_variant	MODIFIER	-	ENSSSCG00000044280	Transcript	ENSSSCT00000068696.1	lncRNA	-	-	-	-	-	-	-	-	-	rs80927063	4633	1	-	-	-	-	-	-	-	-	-	-	-	-	-	Ensembl	-	-	-	-	-	-			AGXT2
H3GA0003282	1:167519126-167519126	T	upstream_gene_variant	MODIFIER	-	ENSSSCG00000044280	Transcript	ENSSSCT00000072938.1	lncRNA	-	-	-	-	-	-	-	-	-	rs80927063	4536	1	-	-	-	-	-	-	-	-	-	-	-	-	-	Ensembl	-	-	-	-	-	-			DAB2
H3GA0003282	1:167519126-167519126	T	upstream_gene_variant	MODIFIER	-	ENSSSCG00000044280	Transcript	ENSSSCT00000091551.1	lncRNA	-	-	-	-	-	-	-	-	-	rs80927063	4633	1	-	-	-	-	-	-	-	-	-	-	-	-	-	Ensembl	-	-	-	-	-	-			OXCT1
ALGA0006886	1:167546126-167546126	G	intron_variant,non_coding_transcript_variant	MODIFIER	-	ENSSSCG00000044280	Transcript	ENSSSCT00000072938.1	lncRNA	-	1/1	ENSSSCT00000072938.1:n.320-4892A>G	-	-	-	-	-	-	rs80871847	-	1	-	-	-	-	-	-	-	-	-	-	-	-	-	Ensembl	-	-	-	-	-	-			C5orf34
ALGA0006886	1:167546126-167546126	G	intron_variant,non_coding_transcript_variant	MODIFIER	-	ENSSSCG00000044280	Transcript	ENSSSCT00000091551.1	lncRNA	-	2/2	ENSSSCT00000091551.1:n.420-4154A>G	-	-	-	-	-	-	rs80871847	-	1	-	-	-	-	-	-	-	-	-	-	-	-	-	Ensembl	-	-	-	-	-	-			TMEM267
MARC0088780	1:167660978-167660978	G	intron_variant,non_coding_transcript_variant	MODIFIER	-	ENSSSCG00000037389	Transcript	ENSSSCT00000042394.2	lncRNA	-	4/9	ENSSSCT00000042394.2:n.580+11321T>C	-	-	-	-	-	-	rs80979649	-	-1	-	-	-	-	-	-	-	-	-	-	-	-	-	Ensembl	-	-	-	-	-	-			C16H5orf34
MARC0088780	1:167660978-167660978	G	intron_variant,non_coding_transcript_variant	MODIFIER	-	ENSSSCG00000037389	Transcript	ENSSSCT00000046559.2	lncRNA	-	2/6	ENSSSCT00000046559.2:n.193-14978T>C	-	-	-	-	-	-	rs80979649	-	-1	-	-	-	-	-	-	-	-	-	-	-	-	-	Ensembl	-	-	-	-	-	-			FGF10
MARC0088780	1:167660978-167660978	G	intron_variant,non_coding_transcript_variant	MODIFIER	-	ENSSSCG00000037389	Transcript	ENSSSCT00000076045.1	lncRNA	-	4/5	ENSSSCT00000076045.1:n.451+11321T>C	-	-	-	-	-	-	rs80979649	-	-1	-	-	-	-	-	-	-	-	-	-	-	-	-	Ensembl	-	-	-	-	-	-			HCN1
MARC0088780	1:167660978-167660978	G	intron_variant,non_coding_transcript_variant	MODIFIER	-	ENSSSCG00000037389	Transcript	ENSSSCT00000087260.1	lncRNA	-	1/2	ENSSSCT00000087260.1:n.60+11321T>C	-	-	-	-	-	-	rs80979649	-	-1	-	-	-	-	-	-	-	-	-	-	-	-	-	Ensembl	-	-	-	-	-	-			ARL15
MARC0044611	1:178003578-178003578	T	intergenic_variant	MODIFIER	-	-	-	-	-	-	-	-	-	-	-	-	-	-	rs80800574	-	-	-	-	-	-	-	-	-	-	-	-	-	-	-	-	-	-	-	-	-	-			IL6ST
ASGA0005422	1:184164749-184164749	T	intergenic_variant	MODIFIER	-	-	-	-	-	-	-	-	-	-	-	-	-	-	rs80950166	-	-	-	-	-	-	-	-	-	-	-	-	-	-	-	-	-	-	-	-	-	-			ANKRD55
ASGA0091065	1:188618837-188618837	T	intron_variant	MODIFIER	JKAMP	ENSSSCG00000034798	Transcript	ENSSSCT00000046375.2	protein_coding	-	7/7	ENSSSCT00000046375.2:c.*1353+561C>T	-	-	-	-	-	-	rs81309513	-	1	-	HGNC	HGNC:20184	-	-	-	-	ENSSSCP00000055123	-	A0A287BGE6,A0A4X1WCY0	UPI00114BC568	-	-	Ensembl	-	-	-	-	-	-			PDE4D
ASGA0091065	1:188618837-188618837	T	intron_variant	MODIFIER	JKAMP	ENSSSCG00000034798	Transcript	ENSSSCT00000050869.2	protein_coding	-	7/7	ENSSSCT00000050869.2:c.*1353+561C>T	-	-	-	-	-	-	rs81309513	-	1	-	HGNC	HGNC:20184	-	-	P1	-	ENSSSCP00000043913	-	A0A287AIT1,A0A4X1WD45	UPI000A2B5A92	-	-	Ensembl	-	-	-	-	-	-			NDUFAF2
ASGA0091065	1:188618837-188618837	T	intron_variant	MODIFIER	L3HYPDH	ENSSSCG00000037854	Transcript	ENSSSCT00000074843.1	protein_coding	-	4/13	ENSSSCT00000074843.1:c.-3421-563G>A	-	-	-	-	-	-	rs81309513	-	-1	-	HGNC	HGNC:20488	-	-	-	-	ENSSSCP00000062548	-	A0A5G2QEE8	UPI0012355032	-	-	Ensembl	-	-	-	-	-	-			MAST4
ASGA0091065	1:188618837-188618837	T	intron_variant	MODIFIER	CCDC175	100622158	Transcript	XM_013985897.2	protein_coding	-	19/20	XM_013985897.2:c.2311-563G>A	-	-	-	-	-	-	rs81309513	-	-1	-	EntrezGene	-	-	-	-	-	XP_013841351.2	-	-	-	-	-	RefSeq	-	-	-	-	-	-			SLIT3
ASGA0091065	1:188618837-188618837	T	downstream_gene_variant	MODIFIER	JKAMP	110262314	Transcript	XM_021102711.1	protein_coding	-	-	-	-	-	-	-	-	-	rs81309513	1132	1	-	EntrezGene	HGNC:20184	-	-	-	-	XP_020958370.1	-	-	-	-	-	RefSeq	-	-	-	-	-	-			TENM2
ASGA0091065	1:188618837-188618837	T	downstream_gene_variant	MODIFIER	JKAMP	110262314	Transcript	XM_021102716.1	protein_coding	-	-	-	-	-	-	-	-	-	rs81309513	1246	1	-	EntrezGene	HGNC:20184	-	-	-	-	XP_020958375.1	-	-	-	-	-	RefSeq	-	-	-	-	-	-			GABRB2
ASGA0091065	1:188618837-188618837	T	downstream_gene_variant	MODIFIER	JKAMP	110262314	Transcript	XM_021102718.1	protein_coding	-	-	-	-	-	-	-	-	-	rs81309513	1132	1	-	EntrezGene	HGNC:20184	-	-	-	-	XP_020958377.1	-	-	-	-	-	RefSeq	-	-	-	-	-	-			CCNJL
ASGA0091065	1:188618837-188618837	T	upstream_gene_variant	MODIFIER	L3HYPDH	110262303	Transcript	XR_002347129.1	misc_RNA	-	-	-	-	-	-	-	-	-	rs81309513	2149	-1	-	EntrezGene	HGNC:20488	-	-	-	-	-	-	-	-	-	-	RefSeq	-	-	-	-	-	-			TTC1
ALGA0007539	1:197974601-197974601	G	intergenic_variant	MODIFIER	-	-	-	-	-	-	-	-	-	-	-	-	-	-	rs80904234	-	-	-	-	-	-	-	-	-	-	-	-	-	-	-	-	-	-	-	-	-	-			ADRA1B
ALGA0007862	1:214125503-214125503	A	intergenic_variant	MODIFIER	-	-	-	-	-	-	-	-	-	-	-	-	-	-	rs80975331	-	-	-	-	-	-	-	-	-	-	-	-	-	-	-	-	-	-	-	-	-	-			EBF1
ASGA0005696	1:214148407-214148407	C	intergenic_variant	MODIFIER	-	-	-	-	-	-	-	-	-	-	-	-	-	-	rs80879558	-	-	-	-	-	-	-	-	-	-	-	-	-	-	-	-	-	-	-	-	-	-			SEMA5A
ASGA0005769	1:220945730-220945730	C	intron_variant	MODIFIER	DMRT1	ENSSSCG00000005236	Transcript	ENSSSCT00000005770.4	protein_coding	-	2/4	ENSSSCT00000005770.4:c.535+2743A>G	-	-	-	-	-	-	rs80843156	-	-1	-	EntrezGene	-	-	-	A2	-	ENSSSCP00000005628	-	F1SJG1	UPI000BAD85EA	-	-	Ensembl	-	-	-	-	-	-			ICE1
ASGA0005769	1:220945730-220945730	C	intron_variant	MODIFIER	DMRT1	ENSSSCG00000005236	Transcript	ENSSSCT00000082212.1	protein_coding	-	2/5	ENSSSCT00000082212.1:c.535+2743A>G	-	-	-	-	-	-	rs80843156	-	-1	-	EntrezGene	-	-	-	P5	-	ENSSSCP00000067348	-	A0A5G2QZH3	UPI0012351B70	-	-	Ensembl	-	-	-	-	-	-			DLC1
ASGA0005769	1:220945730-220945730	C	intron_variant,non_coding_transcript_variant	MODIFIER	-	NM_214111.1	Transcript	NM_214111.1	cDNA	-	2/4	NM_214111.1:n.642+2743A>G	-	-	-	-	-	-	rs80843156	-	-1	-	-	-	-	-	-	-	-	-	-	-	-	-	RefSeq	-	-	-	-	-	-			MSR1
MARC0086108	1:221738134-221738134	A	intron_variant	MODIFIER	PGM5	ENSSSCG00000005243	Transcript	ENSSSCT00000005777.4	protein_coding	-	7/11	ENSSSCT00000005777.4:c.1044-19996G>A	-	-	-	-	-	-	rs81268563	-	1	-	HGNC	HGNC:8908	-	-	P1	-	ENSSSCP00000005635	-	F1SJE6,A0A4X1W5I4	UPI000A2B5A9D	-	-	Ensembl	-	-	-	-	-	-			SLC7A2
MARC0086108	1:221738134-221738134	T	intron_variant	MODIFIER	PGM5	ENSSSCG00000005243	Transcript	ENSSSCT00000005777.4	protein_coding	-	7/11	ENSSSCT00000005777.4:c.1044-19996G>T	-	-	-	-	-	-	rs81268563	-	1	-	HGNC	HGNC:8908	-	-	P1	-	ENSSSCP00000005635	-	F1SJE6,A0A4X1W5I4	UPI000A2B5A9D	-	-	Ensembl	-	-	-	-	-	-			ZFP42
MARC0086108	1:221738134-221738134	A	intron_variant	MODIFIER	PGM5	ENSSSCG00000005243	Transcript	ENSSSCT00000073718.1	protein_coding	-	6/10	ENSSSCT00000073718.1:c.1044-19996G>A	-	-	-	-	-	-	rs81268563	-	1	-	HGNC	HGNC:8908	-	-	-	-	ENSSSCP00000062423	-	A0A5G2QE37	UPI00123478A4	-	-	Ensembl	-	-	-	-	-	-			ANK1
MARC0086108	1:221738134-221738134	T	intron_variant	MODIFIER	PGM5	ENSSSCG00000005243	Transcript	ENSSSCT00000073718.1	protein_coding	-	6/10	ENSSSCT00000073718.1:c.1044-19996G>T	-	-	-	-	-	-	rs81268563	-	1	-	HGNC	HGNC:8908	-	-	-	-	ENSSSCP00000062423	-	A0A5G2QE37	UPI00123478A4	-	-	Ensembl	-	-	-	-	-	-			HAO1
MARC0086108	1:221738134-221738134	A	intron_variant	MODIFIER	PGM5	ENSSSCG00000005243	Transcript	ENSSSCT00000081931.1	protein_coding	-	7/8	ENSSSCT00000081931.1:c.1044-19996G>A	-	-	-	-	-	-	rs81268563	-	1	-	HGNC	HGNC:8908	-	-	-	-	ENSSSCP00000068205	-	A0A5G2QVN5,A0A4X1W700	UPI00114BD698	-	-	Ensembl	-	-	-	-	-	-			PLCB1
MARC0086108	1:221738134-221738134	T	intron_variant	MODIFIER	PGM5	ENSSSCG00000005243	Transcript	ENSSSCT00000081931.1	protein_coding	-	7/8	ENSSSCT00000081931.1:c.1044-19996G>T	-	-	-	-	-	-	rs81268563	-	1	-	HGNC	HGNC:8908	-	-	-	-	ENSSSCP00000068205	-	A0A5G2QVN5,A0A4X1W700	UPI00114BD698	-	-	Ensembl	-	-	-	-	-	-			PAK5
MARC0086108	1:221738134-221738134	A	intron_variant	MODIFIER	PGM5	100511977	Transcript	XM_003121933.6	protein_coding	-	6/10	XM_003121933.6:c.1044-19996G>A	-	-	-	-	-	-	rs81268563	-	1	-	EntrezGene	HGNC:8908	-	-	-	-	XP_003121981.4	-	-	-	-	-	RefSeq	-	-	-	-	-	-			ISM1
MARC0086108	1:221738134-221738134	T	intron_variant	MODIFIER	PGM5	100511977	Transcript	XM_003121933.6	protein_coding	-	6/10	XM_003121933.6:c.1044-19996G>T	-	-	-	-	-	-	rs81268563	-	1	-	EntrezGene	HGNC:8908	-	-	-	-	XP_003121981.4	-	-	-	-	-	RefSeq	-	-	-	-	-	-			TASP1
ALGA0108140	1:222565246-222565246	G	intron_variant	MODIFIER	-	ENSSSCG00000005247	Transcript	ENSSSCT00000005781.4	protein_coding	-	3/24	ENSSSCT00000005781.4:c.-9-5017A>G	-	-	-	-	-	-	rs81336009	-	1	-	-	-	-	-	A2	-	ENSSSCP00000005639	-	F1SJE2	UPI0001C962EB	-	-	Ensembl	-	-	-	-	-	-			MACROD2
ALGA0108140	1:222565246-222565246	G	intron_variant	MODIFIER	-	ENSSSCG00000005247	Transcript	ENSSSCT00000042640.2	protein_coding	-	1/21	ENSSSCT00000042640.2:c.82-5017A>G	-	-	-	-	-	-	rs81336009	-	1	-	-	-	-	-	A2	-	ENSSSCP00000049397	-	A0A287AZ07	UPI0003AEEC49	-	-	Ensembl	-	-	-	-	-	-			DTD1
ALGA0108140	1:222565246-222565246	G	intron_variant	MODIFIER	-	ENSSSCG00000005247	Transcript	ENSSSCT00000052914.2	protein_coding	-	1/22	ENSSSCT00000052914.2:c.82-5017A>G	-	-	-	-	-	-	rs81336009	-	1	-	-	-	-	-	P5	-	ENSSSCP00000053359	-	A0A287BAI8	UPI0001E8671C	-	-	Ensembl	-	-	-	-	-	-			BPIFA2
ALGA0108140	1:222565246-222565246	G	intron_variant	MODIFIER	-	ENSSSCG00000005247	Transcript	ENSSSCT00000054288.2	protein_coding	-	2/23	ENSSSCT00000054288.2:c.-9-5017A>G	-	-	-	-	-	-	rs81336009	-	1	-	-	-	-	-	A2	-	ENSSSCP00000056772	-	A0A287BJI9	UPI000BAD7F2B	-	-	Ensembl	-	-	-	-	-	-			PIGU
ALGA0108140	1:222565246-222565246	G	intron_variant	MODIFIER	-	ENSSSCG00000005247	Transcript	ENSSSCT00000058300.2	protein_coding	-	1/22	ENSSSCT00000058300.2:c.73-5017A>G	-	-	-	-	-	-	rs81336009	-	1	-	-	-	-	-	A2	-	ENSSSCP00000046458	-	A0A287AQX9	UPI0003AE91FF	-	-	Ensembl	-	-	-	-	-	-			DLGAP4
ALGA0108140	1:222565246-222565246	G	intron_variant	MODIFIER	-	ENSSSCG00000005247	Transcript	ENSSSCT00000061441.2	protein_coding	-	4/24	ENSSSCT00000061441.2:c.-9-5017A>G	-	-	-	-	-	-	rs81336009	-	1	-	-	-	-	-	A2	-	ENSSSCP00000038040	-	A0A287A277	UPI0001E8671E	-	-	Ensembl	-	-	-	-	-	-			TGIF2
ALGA0108140	1:222565246-222565246	G	intron_variant	MODIFIER	-	ENSSSCG00000005247	Transcript	ENSSSCT00000062230.2	protein_coding	-	1/22	ENSSSCT00000062230.2:c.73-5017A>G	-	-	-	-	-	-	rs81336009	-	1	-	-	-	-	-	A2	-	ENSSSCP00000032263	-	A0A286ZL28	UPI0012350617	-	-	Ensembl	-	-	-	-	-	-			SOGA1
ALGA0108140	1:222565246-222565246	G	intron_variant,non_coding_transcript_variant	MODIFIER	-	NM_001206404.1	Transcript	NM_001206404.1	cDNA	-	2/22	NM_001206404.1:n.554-5017A>G	-	-	-	-	-	-	rs81336009	-	1	-	-	-	-	-	-	-	-	-	-	-	-	-	RefSeq	-	-	-	-	-	-			CTNNBL1
ALGA0108140	1:222565246-222565246	G	intron_variant	MODIFIER	TJP2	100513065	Transcript	XM_005660143.3	protein_coding	-	1/22	XM_005660143.3:c.82-5017A>G	-	-	-	-	-	-	rs81336009	-	1	-	EntrezGene	-	-	-	-	-	XP_005660200.1	-	-	-	-	-	RefSeq	-	-	-	-	-	-			STK4
ALGA0108140	1:222565246-222565246	G	intron_variant	MODIFIER	TJP2	100513065	Transcript	XM_005660144.3	protein_coding	-	1/22	XM_005660144.3:c.73-5017A>G	-	-	-	-	-	-	rs81336009	-	1	-	EntrezGene	-	-	-	-	-	XP_005660201.1	-	-	-	-	-	RefSeq	-	-	-	-	-	-			EYA2
ALGA0108140	1:222565246-222565246	G	intron_variant	MODIFIER	TJP2	100513065	Transcript	XM_005660146.3	protein_coding	-	3/24	XM_005660146.3:c.-9-5017A>G	-	-	-	-	-	-	rs81336009	-	1	-	EntrezGene	-	-	-	-	-	XP_005660203.1	-	-	-	-	-	RefSeq	-	-	-	-	-	-			PREX1
ALGA0108140	1:222565246-222565246	G	intron_variant	MODIFIER	TJP2	100513065	Transcript	XM_005660147.3	protein_coding	-	1/21	XM_005660147.3:c.82-5017A>G	-	-	-	-	-	-	rs81336009	-	1	-	EntrezGene	-	-	-	-	-	XP_005660204.1	-	-	-	-	-	RefSeq	-	-	-	-	-	-			ADNP
ALGA0108140	1:222565246-222565246	G	intron_variant	MODIFIER	TJP2	100513065	Transcript	XM_005660148.3	protein_coding	-	1/21	XM_005660148.3:c.73-5017A>G	-	-	-	-	-	-	rs81336009	-	1	-	EntrezGene	-	-	-	-	-	XP_005660205.1	-	-	-	-	-	RefSeq	-	-	-	-	-	-			ZNF217
ALGA0108140	1:222565246-222565246	G	intron_variant	MODIFIER	TJP2	100513065	Transcript	XM_021070777.1	protein_coding	-	2/23	XM_021070777.1:c.-9-5017A>G	-	-	-	-	-	-	rs81336009	-	1	-	EntrezGene	-	-	-	-	-	XP_020926436.1	-	-	-	-	-	RefSeq	-	-	-	-	-	-			BCAS1
ALGA0108140	1:222565246-222565246	G	intron_variant	MODIFIER	TJP2	100513065	Transcript	XM_021070931.1	protein_coding	-	3/23	XM_021070931.1:c.-9-5017A>G	-	-	-	-	-	-	rs81336009	-	1	-	EntrezGene	-	-	-	-	-	XP_020926590.1	-	-	-	-	-	RefSeq	-	-	-	-	-	-			CSTF1
ALGA0108140	1:222565246-222565246	G	intron_variant	MODIFIER	TJP2	100513065	Transcript	XM_021070966.1	protein_coding	-	2/22	XM_021070966.1:c.-9-5017A>G	-	-	-	-	-	-	rs81336009	-	1	-	EntrezGene	-	-	-	-	-	XP_020926625.1	-	-	-	-	-	RefSeq	-	-	-	-	-	-			CASS4
ALGA0008236	1:227170572-227170572	T	intergenic_variant	MODIFIER	-	-	-	-	-	-	-	-	-	-	-	-	-	-	rs81350852	-	-	-	-	-	-	-	-	-	-	-	-	-	-	-	-	-	-	-	-	-	-			BMP7
ASGA0006040	1:230905205-230905205	C	intron_variant	MODIFIER	GNAQ	ENSSSCG00000033763	Transcript	ENSSSCT00000057300.2	protein_coding	-	2/7	ENSSSCT00000057300.2:c.136+1632T>G	-	-	-	-	-	-	rs80783062	-	-1	-	EntrezGene	-	-	-	P1	-	ENSSSCP00000035584	Q2PKF4	-	UPI000006D0FB	-	-	Ensembl	-	-	-	-	-	-			RBM38
H3GA0004046	1:239433673-239433673	A	intron_variant	MODIFIER	NCBP1	ENSSSCG00000005366	Transcript	ENSSSCT00000037726.2	protein_coding	-	4/10	ENSSSCT00000037726.2:c.398-827C>A	-	-	-	-	-	-	rs81351336	-	1	-	HGNC	HGNC:7658	-	-	-	-	ENSSSCP00000054194	-	A0A287BCZ0,A0A4X1UDZ5	UPI00022CE119	-	-	Ensembl	-	-	-	-	-	-			APCDD1L
H3GA0004046	1:239433673-239433673	A	intron_variant	MODIFIER	NCBP1	ENSSSCG00000005366	Transcript	ENSSSCT00000044755.2	protein_coding	-	4/8	ENSSSCT00000044755.2:c.398-1804C>A	-	-	-	-	-	-	rs81351336	-	1	-	HGNC	HGNC:7658	-	-	-	-	ENSSSCP00000056172	-	A0A287BJ41	UPI001236B6AC	-	-	Ensembl	-	-	-	-	-	-			CNPY1
H3GA0004046	1:239433673-239433673	A	intron_variant	MODIFIER	NCBP1	ENSSSCG00000005366	Transcript	ENSSSCT00000082914.1	protein_coding	-	5/33	ENSSSCT00000082914.1:c.398-827C>A	-	-	-	-	-	-	rs81351336	-	1	-	HGNC	HGNC:7658	-	-	P5	-	ENSSSCP00000064837	-	A0A5G2QS54,A0A4X1UCA5	UPI00114AF516	-	-	Ensembl	-	-	-	-	-	-			KMT2C
H3GA0004046	1:239433673-239433673	A	intron_variant	MODIFIER	TMOD1	100316850	Transcript	XM_003353588.5	protein_coding	-	4/9	XM_003353588.5:c.398-827C>A	-	-	-	-	-	-	rs81351336	-	1	-	EntrezGene	-	-	-	-	-	XP_003353636.2	-	-	-	-	-	RefSeq	-	-	-	-	-	-			PRKAG2
H3GA0004046	1:239433673-239433673	A	intron_variant	MODIFIER	TMOD1	100316850	Transcript	XM_021066359.1	protein_coding	-	4/9	XM_021066359.1:c.398-827C>A	-	-	-	-	-	-	rs81351336	-	1	-	EntrezGene	-	-	-	-	-	XP_020922018.1	-	-	-	-	-	RefSeq	-	-	-	-	-	-			MKRN1
ASGA0006400	1:240767333-240767333	A	intron_variant	MODIFIER	COL15A1	ENSSSCG00000005380	Transcript	ENSSSCT00000005920.4	protein_coding	-	16/52	ENSSSCT00000005920.4:c.950-1824G>A	-	-	-	-	-	-	rs81351459	-	1	-	HGNC	HGNC:2192	-	-	P5	-	ENSSSCP00000005773	-	F1SSE8	UPI00123520D7	-	-	Ensembl	-	-	-	-	-	-			CREB3L2
ASGA0006400	1:240767333-240767333	A	intron_variant	MODIFIER	COL15A1	ENSSSCG00000005380	Transcript	ENSSSCT00000037246.2	protein_coding	-	6/40	ENSSSCT00000037246.2:c.944-1824G>A	-	-	-	-	-	-	rs81351459	-	1	-	HGNC	HGNC:2192	-	-	A2	-	ENSSSCP00000048772	-	A0A287AX97	UPI000BAD9B6E	-	-	Ensembl	-	-	-	-	-	-			MTPN
ASGA0006400	1:240767333-240767333	A	intron_variant	MODIFIER	COL15A1	ENSSSCG00000005380	Transcript	ENSSSCT00000042391.2	protein_coding	-	8/41	ENSSSCT00000042391.2:c.950-1824G>A	-	-	-	-	-	-	rs81351459	-	1	-	HGNC	HGNC:2192	-	-	-	-	ENSSSCP00000042716	-	A0A287AFT5	UPI000BAD982E	-	-	Ensembl	-	-	-	-	-	-			KCND2
ASGA0006400	1:240767333-240767333	A	intron_variant	MODIFIER	COL15A1	ENSSSCG00000005380	Transcript	ENSSSCT00000053184.2	protein_coding	-	4/31	ENSSSCT00000053184.2:c.887-1824G>A	-	-	-	-	-	-	rs81351459	-	1	-	HGNC	HGNC:2192	-	-	-	-	ENSSSCP00000056238	-	A0A287BIN8	UPI001235B252	-	-	Ensembl	-	-	-	-	-	-			TRIL
ASGA0006400	1:240767333-240767333	A	intron_variant	MODIFIER	COL15A1	100620394	Transcript	XM_021066594.1	protein_coding	-	6/40	XM_021066594.1:c.950-1824G>A	-	-	-	-	-	-	rs81351459	-	1	-	EntrezGene	HGNC:2192	-	-	-	-	XP_020922253.1	-	-	-	-	-	RefSeq	-	-	-	-	-	-			CREB5
ASGA0006412	1:240926872-240926872	G	intergenic_variant	MODIFIER	-	-	-	-	-	-	-	-	-	-	-	-	-	-	rs80946835	-	-	-	-	-	-	-	-	-	-	-	-	-	-	-	-	-	-	-	-	-	-			JAZF1
ASGA0006416	1:241017170-241017170	C	intron_variant,non_coding_transcript_variant	MODIFIER	-	ENSSSCG00000041432	Transcript	ENSSSCT00000089952.1	lncRNA	-	5/6	ENSSSCT00000089952.1:n.646-15867T>G	-	-	-	-	-	-	rs81351483	-	-1	-	-	-	-	-	-	-	-	-	-	-	-	-	Ensembl	-	-	-	-	-	-			HIBADH
ALGA0008826	1:241038711-241038711	A	intron_variant,non_coding_transcript_variant	MODIFIER	-	ENSSSCG00000041432	Transcript	ENSSSCT00000089952.1	lncRNA	-	5/6	ENSSSCT00000089952.1:n.646-37408C>T	-	-	-	-	-	-	rs81351486	-	-1	-	-	-	-	-	-	-	-	-	-	-	-	-	Ensembl	-	-	-	-	-	-			LOC100521594
H3GA0004116	1:241062227-241062227	C	intron_variant,non_coding_transcript_variant	MODIFIER	-	ENSSSCG00000041432	Transcript	ENSSSCT00000089952.1	lncRNA	-	5/6	ENSSSCT00000089952.1:n.646-60924A>G	-	-	-	-	-	-	rs81351487	-	-1	-	-	-	-	-	-	-	-	-	-	-	-	-	Ensembl	-	-	-	-	-	-			NFE2L3
ALGA0008860	1:242512471-242512471	C	intergenic_variant	MODIFIER	-	-	-	-	-	-	-	-	-	-	-	-	-	-	rs80855842	-	-	-	-	-	-	-	-	-	-	-	-	-	-	-	-	-	-	-	-	-	-			TNS3
MARC0013167	1:242690012-242690012	C	intron_variant	MODIFIER	PLPPR1	ENSSSCG00000005393	Transcript	ENSSSCT00000049737.2	protein_coding	-	1/7	ENSSSCT00000049737.2:c.-46+7100T>C	-	-	-	-	-	-	rs80831068	-	1	-	HGNC	HGNC:25993	-	-	A2	-	ENSSSCP00000038032	-	A0A287A2Q3	UPI0012349A24	-	-	Ensembl	-	-	-	-	-	-			GLI3
MARC0013167	1:242690012-242690012	C	intron_variant	MODIFIER	PLPPR1	100154648	Transcript	XM_013993715.2	protein_coding	-	1/7	XM_013993715.2:c.-46+7100T>C	-	-	-	-	-	-	rs80831068	-	1	-	EntrezGene	HGNC:25993	-	-	-	-	XP_013849169.1	-	-	-	-	-	RefSeq	-	-	-	-	-	-			SUGCT
MARC0013167	1:242690012-242690012	C	intron_variant	MODIFIER	PLPPR1	100154648	Transcript	XM_021066742.1	protein_coding	-	1/7	XM_021066742.1:c.-46+7100T>C	-	-	-	-	-	-	rs80831068	-	1	-	EntrezGene	HGNC:25993	-	-	-	-	XP_020922401.1	-	-	-	-	-	RefSeq	-	-	-	-	-	-			RALA
MARC0013167	1:242690012-242690012	C	intron_variant	MODIFIER	PLPPR1	100154648	Transcript	XM_021066769.1	protein_coding	-	1/6	XM_021066769.1:c.-46+7100T>C	-	-	-	-	-	-	rs80831068	-	1	-	EntrezGene	HGNC:25993	-	-	-	-	XP_020922428.1	-	-	-	-	-	RefSeq	-	-	-	-	-	-			SSPO
ALGA0008956	1:246699639-246699639	A	intron_variant	MODIFIER	SLC44A1	ENSSSCG00000005425	Transcript	ENSSSCT00000005968.4	protein_coding	-	12/15	ENSSSCT00000005968.4:c.1495-373G>A	-	-	-	-	-	-	rs80877479	-	1	-	HGNC	HGNC:18798	-	-	A1	-	ENSSSCP00000005820	-	F1SP53,A0A4X1VGD6	UPI000A2AF353	-	-	Ensembl	-	-	-	-	-	-			SHANK2
ALGA0008956	1:246699639-246699639	A	intron_variant	MODIFIER	SLC44A1	ENSSSCG00000005425	Transcript	ENSSSCT00000033541.3	protein_coding	-	12/15	ENSSSCT00000033541.3:c.1501-373G>A	-	-	-	-	-	-	rs80877479	-	1	-	HGNC	HGNC:18798	-	-	-	-	ENSSSCP00000028949	-	K7GM61	UPI00123675E8	-	-	Ensembl	-	-	-	-	-	-			TPCN2
ALGA0008956	1:246699639-246699639	A	intron_variant	MODIFIER	SLC44A1	ENSSSCG00000005425	Transcript	ENSSSCT00000033835.3	protein_coding	-	13/16	ENSSSCT00000033835.3:c.1495-373G>A	-	-	-	-	-	-	rs80877479	-	1	-	HGNC	HGNC:18798	-	-	P5	-	ENSSSCP00000028533	-	K7GL05,A0A4X1VDR5	UPI0001C96083	-	-	Ensembl	-	-	-	-	-	-			SYT12
ALGA0008956	1:246699639-246699639	A	intron_variant	MODIFIER	SLC44A1	ENSSSCG00000005425	Transcript	ENSSSCT00000082405.1	protein_coding	-	11/15	ENSSSCT00000082405.1:c.1462-373G>A	-	-	-	-	-	-	rs80877479	-	1	-	HGNC	HGNC:18798	-	-	-	-	ENSSSCP00000060348	-	A0A5G2QAE8	UPI0012362E5D	-	-	Ensembl	-	-	-	-	-	-			NPAS4
ALGA0008956	1:246699639-246699639	A	intron_variant	MODIFIER	SLC44A1	ENSSSCG00000005425	Transcript	ENSSSCT00000085189.1	protein_coding	-	11/14	ENSSSCT00000085189.1:c.1462-373G>A	-	-	-	-	-	-	rs80877479	-	1	-	HGNC	HGNC:18798	-	-	-	-	ENSSSCP00000060513	-	A0A5G2QQF6	UPI001234078C	-	-	Ensembl	-	-	-	-	-	-			RAB1B
ALGA0008956	1:246699639-246699639	A	intron_variant	MODIFIER	SLC44A1	100152140	Transcript	XM_003480567.3	protein_coding	-	12/15	XM_003480567.3:c.1495-373G>A	-	-	-	-	-	-	rs80877479	-	1	-	EntrezGene	HGNC:18798	-	-	-	-	XP_003480615.1	-	-	-	-	-	RefSeq	-	-	-	-	-	-			KLC2
ALGA0008956	1:246699639-246699639	A	intron_variant	MODIFIER	SLC44A1	100152140	Transcript	XM_005660312.3	protein_coding	-	12/14	XM_005660312.3:c.1495-373G>A	-	-	-	-	-	-	rs80877479	-	1	-	EntrezGene	HGNC:18798	-	-	-	-	XP_005660369.1	-	-	-	-	-	RefSeq	-	-	-	-	-	-			FRMD8
ALGA0008956	1:246699639-246699639	A	intron_variant	MODIFIER	SLC44A1	100152140	Transcript	XM_021067056.1	protein_coding	-	12/15	XM_021067056.1:c.1495-373G>A	-	-	-	-	-	-	rs80877479	-	1	-	EntrezGene	HGNC:18798	-	-	-	-	XP_020922715.1	-	-	-	-	-	RefSeq	-	-	-	-	-	-			MS4A4A
ALGA0008956	1:246699639-246699639	A	intron_variant,non_coding_transcript_variant	MODIFIER	SLC44A1	100152140	Transcript	XR_002337141.1	misc_RNA	-	12/16	XR_002337141.1:n.1701-373G>A	-	-	-	-	-	-	rs80877479	-	1	-	EntrezGene	HGNC:18798	-	-	-	-	-	-	-	-	-	-	RefSeq	-	-	-	-	-	-			OSBP
MARC0033965	1:249998099-249998099	A	intergenic_variant	MODIFIER	-	-	-	-	-	-	-	-	-	-	-	-	-	-	rs80867469	-	-	-	-	-	-	-	-	-	-	-	-	-	-	-	-	-	-	-	-	-	-			U6
ALGA0009235	1:252028141-252028141	C	intergenic_variant	MODIFIER	-	-	-	-	-	-	-	-	-	-	-	-	-	-	rs80813769	-	-	-	-	-	-	-	-	-	-	-	-	-	-	-	-	-	-	-	-	-	-			TSPAN18
ASGA0006803	1:253399341-253399341	G	intergenic_variant	MODIFIER	-	-	-	-	-	-	-	-	-	-	-	-	-	-	rs81351824	-	-	-	-	-	-	-	-	-	-	-	-	-	-	-	-	-	-	-	-	-	-			TP53I11
WU_10.2_1_284728902	1:253869470-253869470	G	upstream_gene_variant	MODIFIER	FKBP15	ENSSSCG00000005477	Transcript	ENSSSCT00000031937.3	protein_coding	-	-	-	-	-	-	-	-	-	rs338243022	1367	-1	-	HGNC	HGNC:23397	-	-	A2	-	ENSSSCP00000028134	-	I3LVI2	UPI00123657B6	-	-	Ensembl	-	-	-	-	-	-			LRRC4C
WU_10.2_1_284728902	1:253869470-253869470	G	intron_variant	MODIFIER	SLC31A1	ENSSSCG00000034278	Transcript	ENSSSCT00000043438.2	protein_coding	-	1/4	ENSSSCT00000043438.2:c.-33+994A>G	-	-	-	-	-	-	rs338243022	-	1	-	EntrezGene	-	-	-	P1	-	ENSSSCP00000044266	Q8WNR0	-	UPI0000088B68	-	-	Ensembl	-	-	-	-	-	-			LIN7C
WU_10.2_1_284728902	1:253869470-253869470	G	upstream_gene_variant	MODIFIER	FKBP15	ENSSSCG00000005477	Transcript	ENSSSCT00000088695.1	protein_coding	-	-	-	-	-	-	-	-	-	rs338243022	1369	-1	-	HGNC	HGNC:23397	-	-	P5	-	ENSSSCP00000065461	-	A0A5G2QLL8	UPI000BAD8D62	-	-	Ensembl	-	-	-	-	-	-			ANO3
WU_10.2_1_284728902	1:253869470-253869470	G	intron_variant,non_coding_transcript_variant	MODIFIER	-	NM_214100.3	Transcript	NM_214100.3	cDNA	-	1/4	NM_214100.3:n.88+994A>G	-	-	-	-	-	-	rs338243022	-	1	-	-	-	-	-	-	-	-	-	-	-	-	-	RefSeq	-	-	-	-	-	-			GAS2
WU_10.2_1_284728902	1:253869470-253869470	G	upstream_gene_variant	MODIFIER	FKBP15	100517260	Transcript	XM_021067627.1	protein_coding	-	-	-	-	-	-	-	-	-	rs338243022	1285	-1	-	EntrezGene	HGNC:23397	-	-	-	-	XP_020923286.1	-	-	-	-	-	RefSeq	-	-	-	-	-	-			HPS5
INRA0007171	1:254485565-254485565	C	intron_variant	MODIFIER	ZNF618	ENSSSCG00000005484	Transcript	ENSSSCT00000006030.4	protein_coding	-	1/15	ENSSSCT00000006030.4:c.33+7571T>C	-	-	-	-	-	-	rs346176524	-	1	-	HGNC	HGNC:29416	-	-	P5	-	ENSSSCP00000005880	-	F1SN72	UPI001234B926	-	-	Ensembl	-	-	-	-	-	-			USP47
INRA0007171	1:254485565-254485565	C	intron_variant	MODIFIER	ZNF618	ENSSSCG00000005484	Transcript	ENSSSCT00000067885.1	protein_coding	-	1/14	ENSSSCT00000067885.1:c.33+7571T>C	-	-	-	-	-	-	rs346176524	-	1	-	HGNC	HGNC:29416	-	-	A2	-	ENSSSCP00000071630	-	A0A5G2R5N3	UPI00123507FE	-	-	Ensembl	-	-	-	-	-	-			MAP2K2
INRA0007171	1:254485565-254485565	C	intron_variant	MODIFIER	ZNF618	ENSSSCG00000005484	Transcript	ENSSSCT00000068251.1	protein_coding	-	1/14	ENSSSCT00000068251.1:c.33+7571T>C	-	-	-	-	-	-	rs346176524	-	1	-	HGNC	HGNC:29416	-	-	A2	-	ENSSSCP00000065983	-	A0A5G2QVM2	UPI00123501A9	-	-	Ensembl	-	-	-	-	-	-			TBC1D9B
INRA0007171	1:254485565-254485565	C	intron_variant	MODIFIER	ZNF618	100157179	Transcript	XM_021067808.1	protein_coding	-	1/14	XM_021067808.1:c.33+7571T>C	-	-	-	-	-	-	rs346176524	-	1	-	EntrezGene	HGNC:29416	-	-	-	-	XP_020923467.1	-	-	-	-	-	RefSeq	-	-	-	-	-	-			RNF130
MARC0001718	1:256903202-256903202	A	intron_variant	MODIFIER	ASTN2	ENSSSCG00000005502	Transcript	ENSSSCT00000006050.4	protein_coding	-	18/21	ENSSSCT00000006050.4:c.3206-20820C>T	-	-	-	-	-	-	rs80846554	-	-1	-	HGNC	HGNC:17021	-	-	A2	-	ENSSSCP00000005896	-	F1SMI1	UPI000A2AFC06	-	-	Ensembl	-	-	-	-	-	-			SERINC5
MARC0001718	1:256903202-256903202	A	intron_variant	MODIFIER	ASTN2	ENSSSCG00000005502	Transcript	ENSSSCT00000044339.2	protein_coding	-	19/22	ENSSSCT00000044339.2:c.3359-20820C>T	-	-	-	-	-	-	rs80846554	-	-1	-	HGNC	HGNC:17021	-	-	P5	-	ENSSSCP00000053030	-	A0A287B967	UPI000A2B9017	-	-	Ensembl	-	-	-	-	-	-			VCAN
MARC0001718	1:256903202-256903202	A	intron_variant	MODIFIER	ASTN2	ENSSSCG00000005502	Transcript	ENSSSCT00000072503.1	protein_coding	-	20/26	ENSSSCT00000072503.1:c.512-20820C>T	-	-	-	-	-	-	rs80846554	-	-1	-	HGNC	HGNC:17021	-	-	-	-	ENSSSCP00000073734	-	A0A5G2RMD9	UPI00123486B6	-	-	Ensembl	-	-	-	-	-	-			XRCC4
MARC0001718	1:256903202-256903202	A	intron_variant	MODIFIER	ASTN2	100523883	Transcript	XM_021074486.1	protein_coding	-	19/22	XM_021074486.1:c.3359-20820C>T	-	-	-	-	-	-	rs80846554	-	-1	-	EntrezGene	HGNC:17021	-	-	-	-	XP_020930145.1	-	-	-	-	-	RefSeq	-	-	-	-	-	-			ADGRV1
MARC0001718	1:256903202-256903202	A	intron_variant	MODIFIER	ASTN2	100523883	Transcript	XM_021074494.1	protein_coding	-	19/22	XM_021074494.1:c.3356-20820C>T	-	-	-	-	-	-	rs80846554	-	-1	-	EntrezGene	HGNC:17021	-	-	-	-	XP_020930153.1	-	-	-	-	-	RefSeq	-	-	-	-	-	-			RHOBTB3
MARC0001718	1:256903202-256903202	A	intron_variant	MODIFIER	ASTN2	100523883	Transcript	XM_021074502.1	protein_coding	-	19/22	XM_021074502.1:c.3347-20820C>T	-	-	-	-	-	-	rs80846554	-	-1	-	EntrezGene	HGNC:17021	-	-	-	-	XP_020930161.1	-	-	-	-	-	RefSeq	-	-	-	-	-	-			CAST
MARC0001718	1:256903202-256903202	A	intron_variant	MODIFIER	ASTN2	100523883	Transcript	XM_021074505.1	protein_coding	-	18/21	XM_021074505.1:c.3206-20820C>T	-	-	-	-	-	-	rs80846554	-	-1	-	EntrezGene	HGNC:17021	-	-	-	-	XP_020930164.1	-	-	-	-	-	RefSeq	-	-	-	-	-	-			RGMB
MARC0001718	1:256903202-256903202	A	intron_variant	MODIFIER	ASTN2	100523883	Transcript	XM_021074507.1	protein_coding	-	19/22	XM_021074507.1:c.3359-20820C>T	-	-	-	-	-	-	rs80846554	-	-1	-	EntrezGene	HGNC:17021	-	-	-	-	XP_020930166.1	-	-	-	-	-	RefSeq	-	-	-	-	-	-			FAM174A
MARC0001718	1:256903202-256903202	A	intron_variant	MODIFIER	ASTN2	100523883	Transcript	XM_021074509.1	protein_coding	-	19/20	XM_021074509.1:c.3359-20820C>T	-	-	-	-	-	-	rs80846554	-	-1	-	EntrezGene	HGNC:17021	-	-	-	-	XP_020930168.1	-	-	-	-	-	RefSeq	-	-	-	-	-	-			PJA2
MARC0001718	1:256903202-256903202	A	intron_variant	MODIFIER	ASTN2	100523883	Transcript	XM_021074513.1	protein_coding	-	4/7	XM_021074513.1:c.575-20820C>T	-	-	-	-	-	-	rs80846554	-	-1	-	EntrezGene	HGNC:17021	-	-	-	-	XP_020930172.1	-	-	-	-	-	RefSeq	-	-	-	-	-	-			MAN2A1
MARC0001718	1:256903202-256903202	A	intron_variant	MODIFIER	ASTN2	100523883	Transcript	XM_021074516.1	protein_coding	-	4/7	XM_021074516.1:c.512-20820C>T	-	-	-	-	-	-	rs80846554	-	-1	-	EntrezGene	HGNC:17021	-	-	-	-	XP_020930175.1	-	-	-	-	-	RefSeq	-	-	-	-	-	-			TMED7
MARC0001718	1:256903202-256903202	A	intron_variant	MODIFIER	ASTN2	100523883	Transcript	XM_021074522.1	protein_coding	-	4/7	XM_021074522.1:c.512-20820C>T	-	-	-	-	-	-	rs80846554	-	-1	-	EntrezGene	HGNC:17021	-	-	-	-	XP_020930181.1	-	-	-	-	-	RefSeq	-	-	-	-	-	-			COMMD10
WU_10.2_1_289692169	1:257960969-257960969	C	intergenic_variant	MODIFIER	-	-	-	-	-	-	-	-	-	-	-	-	-	-	rs329813834	-	-	-	-	-	-	-	-	-	-	-	-	-	-	-	-	-	-	-	-	-	-			SEMA6A
ASGA0007260	1:259444686-259444686	C	intron_variant	MODIFIER	BRINP1	ENSSSCG00000005504	Transcript	ENSSSCT00000006053.4	protein_coding	-	3/8	ENSSSCT00000006053.4:c.219-23245A>G	-	-	-	-	-	-	rs80950554	-	-1	-	HGNC	HGNC:2687	-	-	P1	-	ENSSSCP00000005899	-	F1SMH8,A0A4X1UST7	UPI0006B206ED	-	-	Ensembl	-	-	-	-	-	-			PRR16
ASGA0007260	1:259444686-259444686	C	intron_variant,non_coding_transcript_variant	MODIFIER	-	NM_001315664.1	Transcript	NM_001315664.1	cDNA	-	1/6	NM_001315664.1:n.221-23245A>G	-	-	-	-	-	-	rs80950554	-	-1	-	-	-	-	-	-	-	-	-	-	-	-	-	RefSeq	-	-	-	-	-	-			CEP120
ASGA0007260	1:259444686-259444686	C	intron_variant	MODIFIER	BRINP1	100625235	Transcript	XM_021077997.1	protein_coding	-	2/7	XM_021077997.1:c.219-23245A>G	-	-	-	-	-	-	rs80950554	-	-1	-	EntrezGene	HGNC:2687	-	-	-	-	XP_020933656.1	-	-	-	-	-	RefSeq	-	-	-	-	-	-			SLC27A6
ASGA0007260	1:259444686-259444686	C	intron_variant	MODIFIER	BRINP1	100625235	Transcript	XM_021078035.1	protein_coding	-	3/8	XM_021078035.1:c.219-23245A>G	-	-	-	-	-	-	rs80950554	-	-1	-	EntrezGene	HGNC:2687	-	-	-	-	XP_020933694.1	-	-	-	-	-	RefSeq	-	-	-	-	-	-			ISOC1
ASGA0007260	1:259444686-259444686	C	intron_variant	MODIFIER	BRINP1	100625235	Transcript	XM_021078073.1	protein_coding	-	3/8	XM_021078073.1:c.219-23245A>G	-	-	-	-	-	-	rs80950554	-	-1	-	EntrezGene	HGNC:2687	-	-	-	-	XP_020933732.1	-	-	-	-	-	RefSeq	-	-	-	-	-	-			SPOCK1
ALGA0009867	1:259496373-259496373	A	intron_variant	MODIFIER	BRINP1	ENSSSCG00000005504	Transcript	ENSSSCT00000006053.4	protein_coding	-	2/8	ENSSSCT00000006053.4:c.-50-7787C>T	-	-	-	-	-	-	rs80910265	-	-1	-	HGNC	HGNC:2687	-	-	P1	-	ENSSSCP00000005899	-	F1SMH8,A0A4X1UST7	UPI0006B206ED	-	-	Ensembl	-	-	-	-	-	-			KLHL3
ALGA0009867	1:259496373-259496373	A	intron_variant	MODIFIER	BRINP1	100625235	Transcript	XM_021077997.1	protein_coding	-	1/7	XM_021077997.1:c.-50-7787C>T	-	-	-	-	-	-	rs80910265	-	-1	-	EntrezGene	HGNC:2687	-	-	-	-	XP_020933656.1	-	-	-	-	-	RefSeq	-	-	-	-	-	-			MYOT
ALGA0009867	1:259496373-259496373	A	intron_variant	MODIFIER	BRINP1	100625235	Transcript	XM_021078035.1	protein_coding	-	2/8	XM_021078035.1:c.-50-7787C>T	-	-	-	-	-	-	rs80910265	-	-1	-	EntrezGene	HGNC:2687	-	-	-	-	XP_020933694.1	-	-	-	-	-	RefSeq	-	-	-	-	-	-			REEP2
ALGA0009867	1:259496373-259496373	A	intron_variant	MODIFIER	BRINP1	100625235	Transcript	XM_021078073.1	protein_coding	-	2/8	XM_021078073.1:c.-50-7787C>T	-	-	-	-	-	-	rs80910265	-	-1	-	EntrezGene	HGNC:2687	-	-	-	-	XP_020933732.1	-	-	-	-	-	RefSeq	-	-	-	-	-	-			CXXC5
WU_10.2_1_300440935	1:266617892-266617892	G	intergenic_variant	MODIFIER	-	-	-	-	-	-	-	-	-	-	-	-	-	-	rs332332716	-	-	-	-	-	-	-	-	-	-	-	-	-	-	-	-	-	-	-	-	-	-			JAKMIP2
WU_10.2_1_300535387	1:266672786-266672786	T	intergenic_variant	MODIFIER	-	-	-	-	-	-	-	-	-	-	-	-	-	-	rs318984628	-	-	-	-	-	-	-	-	-	-	-	-	-	-	-	-	-	-	-	-	-	-			IL17B
ASGA0007710	1:267577244-267577244	C	intron_variant	MODIFIER	RALGPS1	ENSSSCG00000005607	Transcript	ENSSSCT00000006165.4	protein_coding	-	3/18	ENSSSCT00000006165.4:c.163-8733T>C	-	-	-	-	-	-	rs80978668	-	1	-	HGNC	HGNC:16851	-	-	-	-	ENSSSCP00000006006	-	F1RS24	UPI001234F817	-	-	Ensembl	-	-	-	-	-	-			CSF1R
ASGA0007710	1:267577244-267577244	C	intron_variant	MODIFIER	RALGPS1	ENSSSCG00000005607	Transcript	ENSSSCT00000037627.2	protein_coding	-	5/18	ENSSSCT00000037627.2:c.214-8733T>C	-	-	-	-	-	-	rs80978668	-	1	-	HGNC	HGNC:16851	-	-	-	-	ENSSSCP00000053640	-	A0A287BAV9,A0A4X1U603	UPI0011481107	-	-	Ensembl	-	-	-	-	-	-			GNA12
ASGA0007710	1:267577244-267577244	C	intron_variant	MODIFIER	RALGPS1	ENSSSCG00000005607	Transcript	ENSSSCT00000064770.2	protein_coding	-	4/17	ENSSSCT00000064770.2:c.298-8733T>C	-	-	-	-	-	-	rs80978668	-	1	-	HGNC	HGNC:16851	-	-	-	-	ENSSSCP00000057451	-	A0A287BMZ5	UPI000A2B015A	-	-	Ensembl	-	-	-	-	-	-			SDK1
ASGA0007710	1:267577244-267577244	C	intron_variant	MODIFIER	RALGPS1	ENSSSCG00000005607	Transcript	ENSSSCT00000064930.2	protein_coding	-	3/18	ENSSSCT00000064930.2:c.109-8733T>C	-	-	-	-	-	-	rs80978668	-	1	-	HGNC	HGNC:16851	-	-	-	-	ENSSSCP00000049512	-	A0A287AZC4	UPI0003AEF63E	-	-	Ensembl	-	-	-	-	-	-			MMD2
ASGA0007710	1:267577244-267577244	C	intron_variant	MODIFIER	RALGPS1	ENSSSCG00000005607	Transcript	ENSSSCT00000065829.2	protein_coding	-	5/18	ENSSSCT00000065829.2:c.214-8733T>C	-	-	-	-	-	-	rs80978668	-	1	-	HGNC	HGNC:16851	-	-	P1	-	ENSSSCP00000047239	-	A0A287ATI3	UPI0003AE920D	-	-	Ensembl	-	-	-	-	-	-			CASTOR2
ASGA0007710	1:267577244-267577244	C	intron_variant	MODIFIER	RALGPS1	ENSSSCG00000005607	Transcript	ENSSSCT00000067495.1	protein_coding	-	4/17	ENSSSCT00000067495.1:c.214-8733T>C	-	-	-	-	-	-	rs80978668	-	1	-	HGNC	HGNC:16851	-	-	-	-	ENSSSCP00000070958	-	A0A5G2R3P2	UPI001234779B	-	-	Ensembl	-	-	-	-	-	-			AUTS2
ASGA0007710	1:267577244-267577244	C	intron_variant	MODIFIER	RALGPS1	ENSSSCG00000005607	Transcript	ENSSSCT00000083020.1	protein_coding	-	4/18	ENSSSCT00000083020.1:c.214-8733T>C	-	-	-	-	-	-	rs80978668	-	1	-	HGNC	HGNC:16851	-	-	-	-	ENSSSCP00000072563	-	A0A5G2R8B7	UPI0010BBBFBE	-	-	Ensembl	-	-	-	-	-	-			ITGAM
ASGA0007710	1:267577244-267577244	C	intron_variant	MODIFIER	RALGPS1	100157921	Transcript	XM_021068990.1	protein_coding	-	4/19	XM_021068990.1:c.298-8733T>C	-	-	-	-	-	-	rs80978668	-	1	-	EntrezGene	HGNC:16851	-	-	-	-	XP_020924649.1	-	-	-	-	-	RefSeq	-	-	-	-	-	-			COX6A2
ASGA0007710	1:267577244-267577244	C	intron_variant	MODIFIER	RALGPS1	100157921	Transcript	XM_021069000.1	protein_coding	-	4/19	XM_021069000.1:c.298-8733T>C	-	-	-	-	-	-	rs80978668	-	1	-	EntrezGene	HGNC:16851	-	-	-	-	XP_020924659.1	-	-	-	-	-	RefSeq	-	-	-	-	-	-			ITGAD
ASGA0007710	1:267577244-267577244	C	intron_variant	MODIFIER	RALGPS1	100157921	Transcript	XM_021069008.1	protein_coding	-	4/19	XM_021069008.1:c.214-8733T>C	-	-	-	-	-	-	rs80978668	-	1	-	EntrezGene	HGNC:16851	-	-	-	-	XP_020924667.1	-	-	-	-	-	RefSeq	-	-	-	-	-	-			LOC100626250
ASGA0007710	1:267577244-267577244	C	intron_variant	MODIFIER	RALGPS1	100157921	Transcript	XM_021069016.1	protein_coding	-	4/19	XM_021069016.1:c.214-8733T>C	-	-	-	-	-	-	rs80978668	-	1	-	EntrezGene	HGNC:16851	-	-	-	-	XP_020924675.1	-	-	-	-	-	RefSeq	-	-	-	-	-	-			PRKCB
ASGA0007710	1:267577244-267577244	C	intron_variant	MODIFIER	RALGPS1	100157921	Transcript	XM_021069027.1	protein_coding	-	4/19	XM_021069027.1:c.214-8733T>C	-	-	-	-	-	-	rs80978668	-	1	-	EntrezGene	HGNC:16851	-	-	-	-	XP_020924686.1	-	-	-	-	-	RefSeq	-	-	-	-	-	-			SCNN1B
ASGA0007710	1:267577244-267577244	C	intron_variant	MODIFIER	RALGPS1	100157921	Transcript	XM_021069038.1	protein_coding	-	4/19	XM_021069038.1:c.214-8733T>C	-	-	-	-	-	-	rs80978668	-	1	-	EntrezGene	HGNC:16851	-	-	-	-	XP_020924697.1	-	-	-	-	-	RefSeq	-	-	-	-	-	-			ABCC1
ASGA0007710	1:267577244-267577244	C	intron_variant	MODIFIER	RALGPS1	100157921	Transcript	XM_021069050.1	protein_coding	-	4/19	XM_021069050.1:c.214-8733T>C	-	-	-	-	-	-	rs80978668	-	1	-	EntrezGene	HGNC:16851	-	-	-	-	XP_020924709.1	-	-	-	-	-	RefSeq	-	-	-	-	-	-			SNX29
ASGA0007710	1:267577244-267577244	C	intron_variant	MODIFIER	RALGPS1	100157921	Transcript	XM_021069060.1	protein_coding	-	4/19	XM_021069060.1:c.214-8733T>C	-	-	-	-	-	-	rs80978668	-	1	-	EntrezGene	HGNC:16851	-	-	-	-	XP_020924719.1	-	-	-	-	-	RefSeq	-	-	-	-	-	-			RBFOX1
ASGA0007710	1:267577244-267577244	C	intron_variant	MODIFIER	RALGPS1	100157921	Transcript	XM_021069069.1	protein_coding	-	4/18	XM_021069069.1:c.298-8733T>C	-	-	-	-	-	-	rs80978668	-	1	-	EntrezGene	HGNC:16851	-	-	-	-	XP_020924728.1	-	-	-	-	-	RefSeq	-	-	-	-	-	-			DNASE1
ASGA0007710	1:267577244-267577244	C	intron_variant	MODIFIER	RALGPS1	100157921	Transcript	XM_021069073.1	protein_coding	-	4/17	XM_021069073.1:c.298-8733T>C	-	-	-	-	-	-	rs80978668	-	1	-	EntrezGene	HGNC:16851	-	-	-	-	XP_020924732.1	-	-	-	-	-	RefSeq	-	-	-	-	-	-			IARS1
ASGA0007710	1:267577244-267577244	C	intron_variant	MODIFIER	RALGPS1	100157921	Transcript	XM_021069084.1	protein_coding	-	4/17	XM_021069084.1:c.298-8733T>C	-	-	-	-	-	-	rs80978668	-	1	-	EntrezGene	HGNC:16851	-	-	-	-	XP_020924743.1	-	-	-	-	-	RefSeq	-	-	-	-	-	-			NOL8
ASGA0007710	1:267577244-267577244	C	intron_variant	MODIFIER	RALGPS1	100157921	Transcript	XM_021069093.1	protein_coding	-	4/17	XM_021069093.1:c.298-8733T>C	-	-	-	-	-	-	rs80978668	-	1	-	EntrezGene	HGNC:16851	-	-	-	-	XP_020924752.1	-	-	-	-	-	RefSeq	-	-	-	-	-	-			CENPP
ASGA0007710	1:267577244-267577244	C	intron_variant	MODIFIER	RALGPS1	100157921	Transcript	XM_021069096.1	protein_coding	-	4/17	XM_021069096.1:c.214-8733T>C	-	-	-	-	-	-	rs80978668	-	1	-	EntrezGene	HGNC:16851	-	-	-	-	XP_020924755.1	-	-	-	-	-	RefSeq	-	-	-	-	-	-			ECM2
ASGA0007710	1:267577244-267577244	C	intron_variant	MODIFIER	RALGPS1	100157921	Transcript	XM_021069100.1	protein_coding	-	4/17	XM_021069100.1:c.214-8733T>C	-	-	-	-	-	-	rs80978668	-	1	-	EntrezGene	HGNC:16851	-	-	-	-	XP_020924759.1	-	-	-	-	-	RefSeq	-	-	-	-	-	-			ST6GAL2
ASGA0007710	1:267577244-267577244	C	intron_variant	MODIFIER	RALGPS1	100157921	Transcript	XM_021069104.1	protein_coding	-	4/17	XM_021069104.1:c.214-8733T>C	-	-	-	-	-	-	rs80978668	-	1	-	EntrezGene	HGNC:16851	-	-	-	-	XP_020924763.1	-	-	-	-	-	RefSeq	-	-	-	-	-	-			SLC9A2
ASGA0007710	1:267577244-267577244	C	intron_variant	MODIFIER	RALGPS1	100157921	Transcript	XM_021069114.1	protein_coding	-	4/17	XM_021069114.1:c.214-8733T>C	-	-	-	-	-	-	rs80978668	-	1	-	EntrezGene	HGNC:16851	-	-	-	-	XP_020924773.1	-	-	-	-	-	RefSeq	-	-	-	-	-	-			IL1RL1
ASGA0007710	1:267577244-267577244	C	intron_variant	MODIFIER	RALGPS1	100157921	Transcript	XM_021069122.1	protein_coding	-	4/16	XM_021069122.1:c.298-8733T>C	-	-	-	-	-	-	rs80978668	-	1	-	EntrezGene	HGNC:16851	-	-	-	-	XP_020924781.1	-	-	-	-	-	RefSeq	-	-	-	-	-	-			IL1R1
ASGA0007710	1:267577244-267577244	C	intron_variant	MODIFIER	RALGPS1	100157921	Transcript	XM_021069123.1	protein_coding	-	4/16	XM_021069123.1:c.214-8733T>C	-	-	-	-	-	-	rs80978668	-	1	-	EntrezGene	HGNC:16851	-	-	-	-	XP_020924782.1	-	-	-	-	-	RefSeq	-	-	-	-	-	-			RTKN
ASGA0007710	1:267577244-267577244	C	intron_variant	MODIFIER	RALGPS1	100157921	Transcript	XM_021069132.1	protein_coding	-	4/16	XM_021069132.1:c.214-8733T>C	-	-	-	-	-	-	rs80978668	-	1	-	EntrezGene	HGNC:16851	-	-	-	-	XP_020924791.1	-	-	-	-	-	RefSeq	-	-	-	-	-	-			EXOC6B
ASGA0007710	1:267577244-267577244	C	intron_variant,non_coding_transcript_variant	MODIFIER	RALGPS1	100157921	Transcript	XR_002337607.1	misc_RNA	-	4/18	XR_002337607.1:n.1041-8733T>C	-	-	-	-	-	-	rs80978668	-	1	-	EntrezGene	HGNC:16851	-	-	-	-	-	-	-	-	-	-	RefSeq	-	-	-	-	-	-			GFPT1
ASGA0007710	1:267577244-267577244	C	intron_variant,non_coding_transcript_variant	MODIFIER	RALGPS1	100157921	Transcript	XR_002337608.1	misc_RNA	-	4/18	XR_002337608.1:n.523-8733T>C	-	-	-	-	-	-	rs80978668	-	1	-	EntrezGene	HGNC:16851	-	-	-	-	-	-	-	-	-	-	RefSeq	-	-	-	-	-	-			MEIS1
MARC0039390	1:271251440-271251440	A	intron_variant	MODIFIER	FAM78A	ENSSSCG00000028172	Transcript	ENSSSCT00000023759.3	protein_coding	-	2/2	ENSSSCT00000023759.3:c.323+5168C>T	-	-	-	-	-	-	rs81232478	-	-1	-	HGNC	HGNC:25465	-	-	P1	-	ENSSSCP00000020943	-	I3LA76,A0A4X1T8W0	UPI0002105188	-	-	Ensembl	-	-	-	-	-	-			SLC1A4
MARC0039390	1:271251440-271251440	A	intron_variant	MODIFIER	PLPP7	ENSSSCG00000005713	Transcript	ENSSSCT00000085017.1	protein_coding	-	2/5	ENSSSCT00000085017.1:c.-2041-3144G>A	-	-	-	-	-	-	rs81232478	-	1	-	HGNC	HGNC:28174	-	-	-	-	ENSSSCP00000068594	-	A0A5G2RD27	UPI0003AF11C1	-	-	Ensembl	-	-	-	-	-	-			CCDC85A
MARC0039390	1:271251440-271251440	A	intron_variant	MODIFIER	FAM78A	100624292	Transcript	XM_013993942.2	protein_coding	-	1/1	XM_013993942.2:c.323+5168C>T	-	-	-	-	-	-	rs81232478	-	-1	-	EntrezGene	HGNC:25465	-	-	-	-	XP_013849396.1	-	-	-	-	-	RefSeq	-	-	-	-	-	-			RTN4
M1GA0001903	1:271765890-271765890	C	intron_variant	MODIFIER	MED27	ENSSSCG00000005720	Transcript	ENSSSCT00000006290.3	protein_coding	-	4/6	ENSSSCT00000006290.3:c.574-14069T>G	-	-	-	-	-	-	rs80820154	-	-1	-	HGNC	HGNC:2377	-	-	-	-	ENSSSCP00000006128	-	A0A2C9F368,A0A4X1T5G9	UPI0004ED5CB8	-	-	Ensembl	-	-	-	-	-	-			GTF2A1L
M1GA0001903	1:271765890-271765890	C	intron_variant	MODIFIER	MED27	ENSSSCG00000005720	Transcript	ENSSSCT00000053035.2	protein_coding	-	4/7	ENSSSCT00000053035.2:c.574-14069T>G	-	-	-	-	-	-	rs80820154	-	-1	-	HGNC	HGNC:2377	-	-	P1	-	ENSSSCP00000034741	Q6Q7J5	-	UPI00003514C7	-	-	Ensembl	-	-	-	-	-	-			LHCGR
M1GA0001903	1:271765890-271765890	C	intron_variant	MODIFIER	MED27	ENSSSCG00000005720	Transcript	ENSSSCT00000071037.1	protein_coding	-	4/6	ENSSSCT00000071037.1:c.574-23863T>G	-	-	-	-	-	-	rs80820154	-	-1	-	HGNC	HGNC:2377	-	-	-	-	ENSSSCP00000062393	-	A0A4X1T8L3,A0A5G2QE10	UPI0003AEA6B7	-	-	Ensembl	-	-	-	-	-	-			TTC7A
M1GA0001903	1:271765890-271765890	C	intron_variant,non_coding_transcript_variant	MODIFIER	-	NM_001001644.1	Transcript	NM_001001644.1	cDNA	-	4/7	NM_001001644.1:n.638-14069T>G	-	-	-	-	-	-	rs80820154	-	-1	-	-	-	-	-	-	-	-	-	-	-	-	-	RefSeq	-	-	-	-	-	-			SRBD1
WU_10.2_1_306704173	1:272786455-272786455	C	synonymous_variant	LOW	-	ENSSSCG00000005738	Transcript	ENSSSCT00000006309.4	protein_coding	8/18	-	ENSSSCT00000006309.4:c.1221A>G	ENSSSCP00000006147.3:p.Lys407%3D	1294	1221	407	K	aaA/aaG	rs323519442	-	-1	-	-	-	-	-	A2	-	ENSSSCP00000006147	-	F1S0S1	UPI000A2B064C	-	-	Ensembl	-	-	-	-	-	-			CAMKMT
WU_10.2_1_306704173	1:272786455-272786455	C	synonymous_variant	LOW	-	ENSSSCG00000005738	Transcript	ENSSSCT00000040445.2	protein_coding	8/18	-	ENSSSCT00000040445.2:c.1287A>G	ENSSSCP00000031526.2:p.Lys429%3D	5033	1287	429	K	aaA/aaG	rs323519442	-	-1	-	-	-	-	-	A2	-	ENSSSCP00000031526	-	A0A480SG10,A0A4X1T2V0	UPI000A2B0A62	-	-	Ensembl	-	-	-	-	-	-			GALNT14
WU_10.2_1_306704173	1:272786455-272786455	C	synonymous_variant	LOW	-	ENSSSCG00000005738	Transcript	ENSSSCT00000042593.2	protein_coding	8/18	-	ENSSSCT00000042593.2:c.1239A>G	ENSSSCP00000059328.2:p.Lys413%3D	1670	1239	413	K	aaA/aaG	rs323519442	-	-1	-	-	-	-	-	A2	-	ENSSSCP00000059328	-	A0A287BSB4	UPI0010B91922	-	-	Ensembl	-	-	-	-	-	-			LBH
WU_10.2_1_306704173	1:272786455-272786455	C	synonymous_variant	LOW	-	ENSSSCG00000005738	Transcript	ENSSSCT00000059353.2	protein_coding	8/18	-	ENSSSCT00000059353.2:c.1287A>G	ENSSSCP00000033176.2:p.Lys429%3D	1287	1287	429	K	aaA/aaG	rs323519442	-	-1	-	-	-	-	-	A2	-	ENSSSCP00000033176	-	A0A286ZNL8	UPI0012352AA3	-	-	Ensembl	-	-	-	-	-	-			FOSL2
WU_10.2_1_306704173	1:272786455-272786455	C	synonymous_variant	LOW	-	ENSSSCG00000005738	Transcript	ENSSSCT00000060366.2	protein_coding	8/18	-	ENSSSCT00000060366.2:c.1404A>G	ENSSSCP00000041533.1:p.Lys468%3D	1483	1404	468	K	aaA/aaG	rs323519442	-	-1	-	-	-	-	-	A2	-	ENSSSCP00000041533	-	A0A287AC43,A0A4X1T253	UPI000A2B5594	-	-	Ensembl	-	-	-	-	-	-			SLC4A1AP
WU_10.2_1_306704173	1:272786455-272786455	C	synonymous_variant	LOW	-	ENSSSCG00000005738	Transcript	ENSSSCT00000063665.2	protein_coding	8/18	-	ENSSSCT00000063665.2:c.1386A>G	ENSSSCP00000049932.2:p.Lys462%3D	1386	1386	462	K	aaA/aaG	rs323519442	-	-1	-	-	-	-	-	A2	-	ENSSSCP00000049932	-	A0A287B131,A0A4X1T244	UPI001149F603	-	-	Ensembl	-	-	-	-	-	-			MAPRE3
WU_10.2_1_306704173	1:272786455-272786455	C	synonymous_variant	LOW	-	ENSSSCG00000005738	Transcript	ENSSSCT00000083802.1	protein_coding	7/17	-	ENSSSCT00000083802.1:c.1566A>G	ENSSSCP00000074368.1:p.Lys522%3D	5312	1566	522	K	aaA/aaG	rs323519442	-	-1	-	-	-	-	-	P5	-	ENSSSCP00000074368	-	A0A5G2RGZ0	UPI00123429C3	-	-	Ensembl	-	-	-	-	-	-			KCNK3
WU_10.2_1_306704173	1:272786455-272786455	C	synonymous_variant	LOW	RALGDS	100513970	Transcript	XM_021070934.1	protein_coding	8/18	-	XM_021070934.1:c.1407A>G	XP_020926593.1:p.Lys469%3D	1438	1407	469	K	aaA/aaG	rs323519442	-	-1	-	EntrezGene	-	-	-	-	-	XP_020926593.1	-	-	-	-	-	RefSeq	-	-	-	-	-	-			FAM166C
WU_10.2_1_306704173	1:272786455-272786455	C	synonymous_variant	LOW	RALGDS	100513970	Transcript	XM_021070943.1	protein_coding	8/18	-	XM_021070943.1:c.1404A>G	XP_020926602.1:p.Lys468%3D	1435	1404	468	K	aaA/aaG	rs323519442	-	-1	-	EntrezGene	-	-	-	-	-	XP_020926602.1	-	-	-	-	-	RefSeq	-	-	-	-	-	-			C3H2orf70
WU_10.2_1_306704173	1:272786455-272786455	C	synonymous_variant	LOW	RALGDS	100513970	Transcript	XM_021070944.1	protein_coding	8/18	-	XM_021070944.1:c.1368A>G	XP_020926603.1:p.Lys456%3D	1398	1368	456	K	aaA/aaG	rs323519442	-	-1	-	EntrezGene	-	-	-	-	-	XP_020926603.1	-	-	-	-	-	RefSeq	-	-	-	-	-	-			HADHB
WU_10.2_1_306704173	1:272786455-272786455	C	synonymous_variant	LOW	RALGDS	100513970	Transcript	XM_021070948.1	protein_coding	8/18	-	XM_021070948.1:c.1326A>G	XP_020926607.1:p.Lys442%3D	5784	1326	442	K	aaA/aaG	rs323519442	-	-1	-	EntrezGene	-	-	-	-	-	XP_020926607.1	-	-	-	-	-	RefSeq	-	-	-	-	-	-			RAB10
WU_10.2_1_306704173	1:272786455-272786455	C	synonymous_variant	LOW	RALGDS	100513970	Transcript	XM_021070950.1	protein_coding	8/18	-	XM_021070950.1:c.1323A>G	XP_020926609.1:p.Lys441%3D	5781	1323	441	K	aaA/aaG	rs323519442	-	-1	-	EntrezGene	-	-	-	-	-	XP_020926609.1	-	-	-	-	-	RefSeq	-	-	-	-	-	-			PFN4
WU_10.2_1_306704173	1:272786455-272786455	C	synonymous_variant	LOW	RALGDS	100513970	Transcript	XM_021070953.1	protein_coding	8/18	-	XM_021070953.1:c.1287A>G	XP_020926612.1:p.Lys429%3D	5368	1287	429	K	aaA/aaG	rs323519442	-	-1	-	EntrezGene	-	-	-	-	-	XP_020926612.1	-	-	-	-	-	RefSeq	-	-	-	-	-	-			MFSD2B
WU_10.2_1_306704173	1:272786455-272786455	C	synonymous_variant	LOW	RALGDS	100513970	Transcript	XM_021070956.1	protein_coding	8/18	-	XM_021070956.1:c.1257A>G	XP_020926615.1:p.Lys419%3D	1344	1257	419	K	aaA/aaG	rs323519442	-	-1	-	EntrezGene	-	-	-	-	-	XP_020926615.1	-	-	-	-	-	RefSeq	-	-	-	-	-	-			WDCP
WU_10.2_1_306704173	1:272786455-272786455	C	synonymous_variant	LOW	RALGDS	100513970	Transcript	XM_021070958.1	protein_coding	8/18	-	XM_021070958.1:c.1221A>G	XP_020926617.1:p.Lys407%3D	1308	1221	407	K	aaA/aaG	rs323519442	-	-1	-	EntrezGene	-	-	-	-	-	XP_020926617.1	-	-	-	-	-	RefSeq	-	-	-	-	-	-			KLHL29
WU_10.2_1_306704173	1:272786455-272786455	C	synonymous_variant	LOW	RALGDS	100513970	Transcript	XM_021070962.1	protein_coding	8/18	-	XM_021070962.1:c.1203A>G	XP_020926621.1:p.Lys401%3D	1628	1203	401	K	aaA/aaG	rs323519442	-	-1	-	EntrezGene	-	-	-	-	-	XP_020926621.1	-	-	-	-	-	RefSeq	-	-	-	-	-	-			APOB
WU_10.2_1_306704173	1:272786455-272786455	C	non_coding_transcript_exon_variant	MODIFIER	RALGDS	100513970	Transcript	XR_002338067.1	misc_RNA	8/18	-	XR_002338067.1:n.1440A>G	-	1440	-	-	-	-	rs323519442	-	-1	-	EntrezGene	-	-	-	-	-	-	-	-	-	-	-	RefSeq	-	-	-	-	-	-			SMC6
WU_10.2_1_306704173	1:272786455-272786455	C	non_coding_transcript_exon_variant	MODIFIER	RALGDS	100513970	Transcript	XR_002338069.1	misc_RNA	8/18	-	XR_002338069.1:n.5746A>G	-	5746	-	-	-	-	rs323519442	-	-1	-	EntrezGene	-	-	-	-	-	-	-	-	-	-	-	RefSeq	-	-	-	-	-	-			RAD51AP2
WU_10.2_1_306704173	1:272786455-272786455	C	non_coding_transcript_exon_variant	MODIFIER	RALGDS	100513970	Transcript	XR_002338070.1	misc_RNA	8/18	-	XR_002338070.1:n.1308A>G	-	1308	-	-	-	-	rs323519442	-	-1	-	EntrezGene	-	-	-	-	-	-	-	-	-	-	-	RefSeq	-	-	-	-	-	-			E2F6
WU_10.2_1_308352887	1:274260929-274260929	A	3_prime_UTR_variant	MODIFIER	OLFM1	ENSSSCG00000029715	Transcript	ENSSSCT00000023409.3	protein_coding	6/6	-	ENSSSCT00000023409.3:c.*617G>A	-	2193	-	-	-	-	rs323605711	-	1	-	HGNC	HGNC:17187	-	-	P1	-	ENSSSCP00000024900	-	I3LLD2,A0A4X1SVM5	UPI000A2B934A	-	-	Ensembl	-	-	-	-	-	-			RPS7
WU_10.2_1_308352887	1:274260929-274260929	A	3_prime_UTR_variant	MODIFIER	OLFM1	ENSSSCG00000029715	Transcript	ENSSSCT00000030751.3	protein_coding	7/7	-	ENSSSCT00000030751.3:c.*549G>A	-	2182	-	-	-	-	rs323605711	-	1	-	HGNC	HGNC:17187	-	-	-	-	ENSSSCP00000023505	-	I3LHF9	UPI001234AA7D	-	-	Ensembl	-	-	-	-	-	-			GLI4
WU_10.2_1_308352887	1:274260929-274260929	A	3_prime_UTR_variant	MODIFIER	OLFM1	100620523	Transcript	XM_021071662.1	protein_coding	6/6	-	XM_021071662.1:c.*617G>A	-	2208	-	-	-	-	rs323605711	-	1	-	EntrezGene	HGNC:17187	-	-	-	-	XP_020927321.1	-	-	-	-	-	RefSeq	-	-	-	-	-	-			SLC45A4
ALGA0056494	10:3680452-3680452	A	intergenic_variant	MODIFIER	-	-	-	-	-	-	-	-	-	-	-	-	-	-	rs80791178	-	-	-	-	-	-	-	-	-	-	-	-	-	-	-	-	-	-	-	-	-	-			AGO2
WU_10.2_10_5732339	10:3720144-3720144	C	intergenic_variant	MODIFIER	-	-	-	-	-	-	-	-	-	-	-	-	-	-	rs342192211	-	-	-	-	-	-	-	-	-	-	-	-	-	-	-	-	-	-	-	-	-	-			LRRC6
WU_10.2_10_7395243	10:5544423-5544423	T	intergenic_variant	MODIFIER	-	-	-	-	-	-	-	-	-	-	-	-	-	-	rs346349404	-	-	-	-	-	-	-	-	-	-	-	-	-	-	-	-	-	-	-	-	-	-			KCNQ3
ALGA0056614	10:5580261-5580261	A	intergenic_variant	MODIFIER	-	-	-	-	-	-	-	-	-	-	-	-	-	-	rs80848254	-	-	-	-	-	-	-	-	-	-	-	-	-	-	-	-	-	-	-	-	-	-			NSMCE2
ASGA0095598	10:6397356-6397356	A	downstream_gene_variant	MODIFIER	-	ENSSSCG00000038066	Transcript	ENSSSCT00000059954.2	protein_coding	-	-	-	-	-	-	-	-	-	rs81315038	1489	-1	-	-	-	-	-	P1	-	ENSSSCP00000051987	-	A0A287B6R5	UPI00123488DA	-	-	Ensembl	-	-	-	-	-	-			MTSS1
ASGA0095598	10:6397356-6397356	A	intron_variant	MODIFIER	USH2A	100513222	Transcript	XM_021064292.1	protein_coding	-	22/72	XM_021064292.1:c.4625+2189C>T	-	-	-	-	-	-	rs81315038	-	-1	-	EntrezGene	-	-	-	-	-	XP_020919951.1	-	-	-	-	-	RefSeq	-	-	-	-	-	-			NDUFB9
H3GA0029174	10:9538241-9538241	G	intron_variant	MODIFIER	-	ENSSSCG00000039095	Transcript	ENSSSCT00000046075.2	protein_coding	-	2/3	ENSSSCT00000046075.2:c.44-2760A>C	-	-	-	-	-	-	rs81429019	-	-1	-	-	-	-	-	P1	-	ENSSSCP00000042805	-	A0A286ZNE3,A0A4X1TSC6	UPI000BAD78C1	-	-	Ensembl	-	-	-	-	-	-			EXT1
H3GA0029174	10:9538241-9538241	G	intron_variant	MODIFIER	SLC30A10	100623097	Transcript	XM_003357627.4	protein_coding	-	2/3	XM_003357627.4:c.733-2760A>C	-	-	-	-	-	-	rs81429019	-	-1	-	EntrezGene	-	-	-	-	-	XP_003357675.2	-	-	-	-	-	RefSeq	-	-	-	-	-	-			ZFPM2
ASGA0046547	10:11435065-11435065	C	intron_variant	MODIFIER	AIDA	ENSSSCG00000010835	Transcript	ENSSSCT00000011854.4	protein_coding	-	8/9	ENSSSCT00000011854.4:c.706+167A>G	-	-	-	-	-	-	rs81429602	-	-1	-	HGNC	HGNC:25761	-	-	P1	-	ENSSSCP00000011551	-	F1S9H0,A0A4X1TLZ0	UPI0001C9729E	-	-	Ensembl	-	-	-	-	-	-			DPYS
ASGA0046547	10:11435065-11435065	C	intron_variant	MODIFIER	AIDA	ENSSSCG00000010835	Transcript	ENSSSCT00000077116.1	protein_coding	-	7/8	ENSSSCT00000077116.1:c.652+167A>G	-	-	-	-	-	-	rs81429602	-	-1	-	HGNC	HGNC:25761	-	-	-	-	ENSSSCP00000073710	-	A0A5G2RBJ5,A0A4X1THS0	UPI0011483CB5	-	-	Ensembl	-	-	-	-	-	-			RRM2B
ASGA0046547	10:11435065-11435065	C	intron_variant	MODIFIER	AIDA	ENSSSCG00000010835	Transcript	ENSSSCT00000084096.1	protein_coding	-	6/7	ENSSSCT00000084096.1:c.461-2264A>G	-	-	-	-	-	-	rs81429602	-	-1	-	HGNC	HGNC:25761	-	-	-	-	ENSSSCP00000065464	-	A0A4X1TM01,A0A5G2QKV5	UPI00114A62E2	-	-	Ensembl	-	-	-	-	-	-			VPS13B
ASGA0046547	10:11435065-11435065	C	intron_variant	MODIFIER	AIDA	ENSSSCG00000010835	Transcript	ENSSSCT00000085724.1	protein_coding	-	8/9	ENSSSCT00000085724.1:c.835+167A>G	-	-	-	-	-	-	rs81429602	-	-1	-	HGNC	HGNC:25761	-	-	-	-	ENSSSCP00000070744	-	A0A5G2R9E4	UPI0012343834	-	-	Ensembl	-	-	-	-	-	-			LAPTM4B
ASGA0046547	10:11435065-11435065	C	intron_variant	MODIFIER	AIDA	100518326	Transcript	XM_003130513.6	protein_coding	-	8/9	XM_003130513.6:c.706+167A>G	-	-	-	-	-	-	rs81429602	-	-1	-	EntrezGene	HGNC:25761	-	-	-	-	XP_003130561.3	-	-	-	-	-	RefSeq	-	-	-	-	-	-			SULF1
ASGA0046547	10:11435065-11435065	C	intron_variant	MODIFIER	AIDA	100518326	Transcript	XM_013980033.1	protein_coding	-	7/8	XM_013980033.1:c.584-2264A>G	-	-	-	-	-	-	rs81429602	-	-1	-	EntrezGene	HGNC:25761	-	-	-	-	XP_013835487.1	-	-	-	-	-	RefSeq	-	-	-	-	-	-			MCMDC2
ASGA0046547	10:11435065-11435065	C	intron_variant,non_coding_transcript_variant	MODIFIER	AIDA	100518326	Transcript	XR_002336125.1	misc_RNA	-	8/9	XR_002336125.1:n.951+167A>G	-	-	-	-	-	-	rs81429602	-	-1	-	EntrezGene	HGNC:25761	-	-	-	-	-	-	-	-	-	-	RefSeq	-	-	-	-	-	-			CSPP1
WU_10.2_10_17282890	10:14964265-14964265	T	intergenic_variant	MODIFIER	-	-	-	-	-	-	-	-	-	-	-	-	-	-	rs339492764	-	-	-	-	-	-	-	-	-	-	-	-	-	-	-	-	-	-	-	-	-	-			ASPH
ALGA0112074	10:18344815-18344815	T	intron_variant	MODIFIER	SMYD3	ENSSSCG00000022034	Transcript	ENSSSCT00000032490.3	protein_coding	-	10/11	ENSSSCT00000032490.3:c.1077-44877C>A	-	-	-	-	-	-	rs81340590	-	-1	-	EntrezGene	-	-	-	P1	-	ENSSSCP00000019427	-	I3L5X6,A0A4X1SZG1	UPI0002266CFE	-	-	Ensembl	-	-	-	-	-	-			ADCY10
ALGA0112074	10:18344815-18344815	T	intron_variant,non_coding_transcript_variant	MODIFIER	-	NM_001160092.2	Transcript	NM_001160092.2	cDNA	-	5/6	NM_001160092.2:n.550-44877C>A	-	-	-	-	-	-	rs81340590	-	-1	-	-	-	-	-	-	-	-	-	-	-	-	-	RefSeq	-	-	-	-	-	-			DDR2
WU_10.2_10_20981313	10:18458018-18458018	A	intron_variant	MODIFIER	SMYD3	ENSSSCG00000022034	Transcript	ENSSSCT00000032490.3	protein_coding	-	7/11	ENSSSCT00000032490.3:c.702+3747C>T	-	-	-	-	-	-	rs336306009	-	-1	-	EntrezGene	-	-	-	P1	-	ENSSSCP00000019427	-	I3L5X6,A0A4X1SZG1	UPI0002266CFE	-	-	Ensembl	-	-	-	-	-	-			NOS1AP
WU_10.2_10_20981313	10:18458018-18458018	A	intron_variant,non_coding_transcript_variant	MODIFIER	-	NM_001160092.2	Transcript	NM_001160092.2	cDNA	-	2/6	NM_001160092.2:n.175+3747C>T	-	-	-	-	-	-	rs336306009	-	-1	-	-	-	-	-	-	-	-	-	-	-	-	-	RefSeq	-	-	-	-	-	-			C4H1orf226
DRGA0017523	10:18506326-18506326	T	intron_variant	MODIFIER	SMYD3	ENSSSCG00000022034	Transcript	ENSSSCT00000032490.3	protein_coding	-	5/11	ENSSSCT00000032490.3:c.532-42548C>A	-	-	-	-	-	-	rs343222628	-	-1	-	EntrezGene	-	-	-	P1	-	ENSSSCP00000019427	-	I3L5X6,A0A4X1SZG1	UPI0002266CFE	-	-	Ensembl	-	-	-	-	-	-			LOC100520241
ALGA0057627	10:18671174-18671174	A	intron_variant	MODIFIER	SMYD3	ENSSSCG00000022034	Transcript	ENSSSCT00000032490.3	protein_coding	-	5/11	ENSSSCT00000032490.3:c.531+158375C>T	-	-	-	-	-	-	rs81421636	-	-1	-	EntrezGene	-	-	-	P1	-	ENSSSCP00000019427	-	I3L5X6,A0A4X1SZG1	UPI0002266CFE	-	-	Ensembl	-	-	-	-	-	-			ANXA9
WU_10.2_10_22034045	10:19535825-19535825	C	intron_variant	MODIFIER	SUSD4	ENSSSCG00000011176	Transcript	ENSSSCT00000012239.4	protein_coding	-	2/9	ENSSSCT00000012239.4:c.139+15101A>G	-	-	-	-	-	-	rs344136854	-	-1	-	HGNC	HGNC:25470	-	-	P1	-	ENSSSCP00000011925	-	F1RX26	UPI0012342FD8	-	-	Ensembl	-	-	-	-	-	-			HAO2
WU_10.2_10_22034045	10:19535825-19535825	C	downstream_gene_variant	MODIFIER	-	ENSSSCG00000048503	Transcript	ENSSSCT00000070768.1	pseudogene	-	-	-	-	-	-	-	-	-	rs344136854	4153	1	-	-	-	-	-	-	-	-	-	-	-	-	-	Ensembl	-	-	-	-	-	-			WARS2
WU_10.2_10_22034045	10:19535825-19535825	C	intron_variant	MODIFIER	SUSD4	100516995	Transcript	XM_021064474.1	protein_coding	-	2/8	XM_021064474.1:c.139+15101A>G	-	-	-	-	-	-	rs344136854	-	-1	-	EntrezGene	HGNC:25470	-	-	-	-	XP_020920133.1	-	-	-	-	-	RefSeq	-	-	-	-	-	-			SPAG17
WU_10.2_10_24859705	10:20235747-20235747	C	intron_variant	MODIFIER	CRB1	ENSSSCG00000021897	Transcript	ENSSSCT00000011925.4	protein_coding	-	5/11	ENSSSCT00000011925.4:c.1360+23935T>C	-	-	-	-	-	-	rs340778087	-	1	-	HGNC	HGNC:2343	-	-	P1	-	ENSSSCP00000011618	-	F1S5G9	UPI000A2B4485	-	-	Ensembl	-	-	-	-	-	-			GDAP2
WU_10.2_10_24859705	10:20235747-20235747	C	intron_variant	MODIFIER	CRB1	ENSSSCG00000021897	Transcript	ENSSSCT00000060692.2	protein_coding	-	3/9	ENSSSCT00000060692.2:c.1024+23935T>C	-	-	-	-	-	-	rs340778087	-	1	-	HGNC	HGNC:2343	-	-	-	-	ENSSSCP00000038584	-	A0A287A3P1	UPI000BAD6A36	-	-	Ensembl	-	-	-	-	-	-			VTCN1
WU_10.2_10_24859705	10:20235747-20235747	C	intron_variant	MODIFIER	CRB1	100738148	Transcript	XM_021064482.1	protein_coding	-	5/11	XM_021064482.1:c.1360+23935T>C	-	-	-	-	-	-	rs340778087	-	1	-	EntrezGene	HGNC:2343	-	-	-	-	XP_020920141.1	-	-	-	-	-	RefSeq	-	-	-	-	-	-			MAB21L3
WU_10.2_10_25169206	10:20493941-20493941	C	intron_variant	MODIFIER	DENND1B	ENSSSCG00000010900	Transcript	ENSSSCT00000011926.4	protein_coding	-	11/25	ENSSSCT00000011926.4:c.673-1836A>G	-	-	-	-	-	-	rs333026337	-	-1	-	HGNC	HGNC:28404	-	-	P5	-	ENSSSCP00000011619	-	F1S5G7	UPI001235C3D8	-	-	Ensembl	-	-	-	-	-	-			SLC22A15
WU_10.2_10_25169206	10:20493941-20493941	C	intron_variant	MODIFIER	DENND1B	ENSSSCG00000010900	Transcript	ENSSSCT00000049148.2	protein_coding	-	8/13	ENSSSCT00000049148.2:c.541-1836A>G	-	-	-	-	-	-	rs333026337	-	-1	-	HGNC	HGNC:28404	-	-	-	-	ENSSSCP00000052705	-	A0A287B8A3	UPI0012355910	-	-	Ensembl	-	-	-	-	-	-			RAP1A
WU_10.2_10_25169206	10:20493941-20493941	C	intron_variant	MODIFIER	DENND1B	ENSSSCG00000010900	Transcript	ENSSSCT00000062646.2	protein_coding	-	10/22	ENSSSCT00000062646.2:c.673-1836A>G	-	-	-	-	-	-	rs333026337	-	-1	-	HGNC	HGNC:28404	-	-	A2	-	ENSSSCP00000049508	-	A0A287B032	UPI000BAD83BA	-	-	Ensembl	-	-	-	-	-	-			ATP5PB
WU_10.2_10_25169206	10:20493941-20493941	C	intron_variant	MODIFIER	DENND1B	100738229	Transcript	XM_021064483.1	protein_coding	-	9/21	XM_021064483.1:c.613-1836A>G	-	-	-	-	-	-	rs333026337	-	-1	-	EntrezGene	HGNC:28404	-	-	-	-	XP_020920142.1	-	-	-	-	-	RefSeq	-	-	-	-	-	-			ATP5F1
WU_10.2_10_25137727	10:20525387-20525387	C	intron_variant	MODIFIER	DENND1B	ENSSSCG00000010900	Transcript	ENSSSCT00000011926.4	protein_coding	-	6/25	ENSSSCT00000011926.4:c.297-3302A>G	-	-	-	-	-	-	rs320432148	-	-1	-	HGNC	HGNC:28404	-	-	P5	-	ENSSSCP00000011619	-	F1S5G7	UPI001235C3D8	-	-	Ensembl	-	-	-	-	-	-			VAV3
WU_10.2_10_25137727	10:20525387-20525387	C	intron_variant	MODIFIER	DENND1B	ENSSSCG00000010900	Transcript	ENSSSCT00000049148.2	protein_coding	-	4/13	ENSSSCT00000049148.2:c.225-3302A>G	-	-	-	-	-	-	rs320432148	-	-1	-	HGNC	HGNC:28404	-	-	-	-	ENSSSCP00000052705	-	A0A287B8A3	UPI0012355910	-	-	Ensembl	-	-	-	-	-	-			FRRS1
WU_10.2_10_25137727	10:20525387-20525387	C	intron_variant	MODIFIER	DENND1B	ENSSSCG00000010900	Transcript	ENSSSCT00000062646.2	protein_coding	-	5/22	ENSSSCT00000062646.2:c.297-3302A>G	-	-	-	-	-	-	rs320432148	-	-1	-	HGNC	HGNC:28404	-	-	A2	-	ENSSSCP00000049508	-	A0A287B032	UPI000BAD83BA	-	-	Ensembl	-	-	-	-	-	-			DPYD
WU_10.2_10_25137727	10:20525387-20525387	C	intron_variant	MODIFIER	DENND1B	100738229	Transcript	XM_021064483.1	protein_coding	-	5/21	XM_021064483.1:c.297-3302A>G	-	-	-	-	-	-	rs320432148	-	-1	-	EntrezGene	HGNC:28404	-	-	-	-	XP_020920142.1	-	-	-	-	-	RefSeq	-	-	-	-	-	-			ARHGAP29
WU_10.2_10_25700959	10:21040272-21040272	A	intron_variant	MODIFIER	NEK7	ENSSSCG00000010904	Transcript	ENSSSCT00000045124.2	protein_coding	-	2/9	ENSSSCT00000045124.2:c.127-4526G>A	-	-	-	-	-	-	rs326188617	-	1	-	HGNC	HGNC:13386	-	-	P1	-	ENSSSCP00000054814	-	A0A287BE42	UPI000BADA7CB	-	-	Ensembl	-	-	-	-	-	-			ABCA4
WU_10.2_10_25700959	10:21040272-21040272	A	intron_variant	MODIFIER	NEK7	100521742	Transcript	XM_005667989.3	protein_coding	-	2/9	XM_005667989.3:c.58-4526G>A	-	-	-	-	-	-	rs326188617	-	1	-	EntrezGene	HGNC:13386	-	-	-	-	XP_005668046.1	-	-	-	-	-	RefSeq	-	-	-	-	-	-			DNTTIP2
WU_10.2_10_25700959	10:21040272-21040272	A	intron_variant	MODIFIER	NEK7	100521742	Transcript	XM_021064487.1	protein_coding	-	1/8	XM_021064487.1:c.58-4526G>A	-	-	-	-	-	-	rs326188617	-	1	-	EntrezGene	HGNC:13386	-	-	-	-	XP_020920146.1	-	-	-	-	-	RefSeq	-	-	-	-	-	-			LOC100523492
WU_10.2_10_25700959	10:21040272-21040272	A	intron_variant	MODIFIER	NEK7	100521742	Transcript	XM_021064488.1	protein_coding	-	1/8	XM_021064488.1:c.58-4526G>A	-	-	-	-	-	-	rs326188617	-	1	-	EntrezGene	HGNC:13386	-	-	-	-	XP_020920147.1	-	-	-	-	-	RefSeq	-	-	-	-	-	-			LOC100523668
WU_10.2_10_25700959	10:21040272-21040272	A	intron_variant	MODIFIER	NEK7	100521742	Transcript	XM_021064489.1	protein_coding	-	2/8	XM_021064489.1:c.57+15790G>A	-	-	-	-	-	-	rs326188617	-	1	-	EntrezGene	HGNC:13386	-	-	-	-	XP_020920148.1	-	-	-	-	-	RefSeq	-	-	-	-	-	-			PPP6R2
WU_10.2_10_25768437	10:21107665-21107665	G	intron_variant	MODIFIER	NEK7	ENSSSCG00000010904	Transcript	ENSSSCT00000045124.2	protein_coding	-	9/9	ENSSSCT00000045124.2:c.867+13061A>G	-	-	-	-	-	-	rs327212449	-	1	-	HGNC	HGNC:13386	-	-	P1	-	ENSSSCP00000054814	-	A0A287BE42	UPI000BADA7CB	-	-	Ensembl	-	-	-	-	-	-			PHF21B
WU_10.2_10_25768437	10:21107665-21107665	G	intron_variant	MODIFIER	NEK7	100521742	Transcript	XM_005667989.3	protein_coding	-	9/9	XM_005667989.3:c.798+13061A>G	-	-	-	-	-	-	rs327212449	-	1	-	EntrezGene	HGNC:13386	-	-	-	-	XP_005668046.1	-	-	-	-	-	RefSeq	-	-	-	-	-	-			SNU13
WU_10.2_10_25768437	10:21107665-21107665	G	intron_variant	MODIFIER	NEK7	100521742	Transcript	XM_021064487.1	protein_coding	-	8/8	XM_021064487.1:c.798+13061A>G	-	-	-	-	-	-	rs327212449	-	1	-	EntrezGene	HGNC:13386	-	-	-	-	XP_020920146.1	-	-	-	-	-	RefSeq	-	-	-	-	-	-			C5H22orf46
WU_10.2_10_25768437	10:21107665-21107665	G	intron_variant	MODIFIER	NEK7	100521742	Transcript	XM_021064489.1	protein_coding	-	8/8	XM_021064489.1:c.657+13061A>G	-	-	-	-	-	-	rs327212449	-	1	-	EntrezGene	HGNC:13386	-	-	-	-	XP_020920148.1	-	-	-	-	-	RefSeq	-	-	-	-	-	-			ST13
WU_10.2_10_25930209	10:21269145-21269145	G	intergenic_variant	MODIFIER	-	-	-	-	-	-	-	-	-	-	-	-	-	-	rs329813411	-	-	-	-	-	-	-	-	-	-	-	-	-	-	-	-	-	-	-	-	-	-			SLC25A17
WU_10.2_10_25946397	10:21285879-21285879	C	intron_variant,non_coding_transcript_variant	MODIFIER	-	ENSSSCG00000042753	Transcript	ENSSSCT00000076550.1	lncRNA	-	3/3	ENSSSCT00000076550.1:n.672+307A>G	-	-	-	-	-	-	rs338370992	-	-1	-	-	-	-	-	-	-	-	-	-	-	-	-	Ensembl	-	-	-	-	-	-			MRTFA
ALGA0057823	10:21492016-21492016	C	intron_variant	MODIFIER	PTPRC	ENSSSCG00000010908	Transcript	ENSSSCT00000011937.4	protein_coding	-	2/32	ENSSSCT00000011937.4:c.-1325+8675T>C	-	-	-	-	-	-	rs81422088	-	1	-	HGNC	HGNC:9666	-	-	-	-	ENSSSCP00000011630	-	F1S5D8	UPI000BADA682	-	-	Ensembl	-	-	-	-	-	-			SGSM3
ALGA0057823	10:21492016-21492016	C	intron_variant	MODIFIER	PTPRC	ENSSSCG00000010908	Transcript	ENSSSCT00000037090.2	protein_coding	-	2/31	ENSSSCT00000037090.2:c.-1325+8675T>C	-	-	-	-	-	-	rs81422088	-	1	-	HGNC	HGNC:9666	-	-	-	-	ENSSSCP00000038572	-	A0A287A482	UPI0012355C7B	-	-	Ensembl	-	-	-	-	-	-			MKL1
ALGA0057823	10:21492016-21492016	C	intron_variant	MODIFIER	PTPRC	ENSSSCG00000010908	Transcript	ENSSSCT00000048012.2	protein_coding	-	1/23	ENSSSCT00000048012.2:c.97+8645T>C	-	-	-	-	-	-	rs81422088	-	1	-	HGNC	HGNC:9666	-	-	P5	-	ENSSSCP00000040401	-	A0A287A9D0	UPI000BAD923C	-	-	Ensembl	-	-	-	-	-	-			TNRC6B
ALGA0057823	10:21492016-21492016	C	intron_variant	MODIFIER	PTPRC	ENSSSCG00000010908	Transcript	ENSSSCT00000066711.1	protein_coding	-	3/5	ENSSSCT00000066711.1:c.73+8675T>C	-	-	-	-	-	-	rs81422088	-	1	-	HGNC	HGNC:9666	-	-	-	-	ENSSSCP00000072671	-	A0A5G2R602,A0A4X1SP86	UPI00114C0408	-	-	Ensembl	-	-	-	-	-	-			CACNA1I
ALGA0057823	10:21492016-21492016	C	intron_variant	MODIFIER	PTPRC	100522631	Transcript	XM_003130596.6	protein_coding	-	2/31	XM_003130596.6:c.73+8675T>C	-	-	-	-	-	-	rs81422088	-	1	-	EntrezGene	HGNC:9666	-	-	-	-	XP_003130644.5	-	-	-	-	-	RefSeq	-	-	-	-	-	-			TMEM184B
WU_10.2_10_26933674	10:22285680-22285680	C	intergenic_variant	MODIFIER	-	-	-	-	-	-	-	-	-	-	-	-	-	-	rs335514692	-	-	-	-	-	-	-	-	-	-	-	-	-	-	-	-	-	-	-	-	-	-			SH3BP1
ALGA0119962	10:22962106-22962106	T	downstream_gene_variant	MODIFIER	-	ENSSSCG00000045833	Transcript	ENSSSCT00000071121.1	lncRNA	-	-	-	-	-	-	-	-	-	rs81327241	1096	-1	-	-	-	-	-	-	-	-	-	-	-	-	-	Ensembl	-	-	-	-	-	-			GGA1
ALGA0119962	10:22962106-22962106	T	downstream_gene_variant	MODIFIER	-	ENSSSCG00000045833	Transcript	ENSSSCT00000074533.1	lncRNA	-	-	-	-	-	-	-	-	-	rs81327241	1096	-1	-	-	-	-	-	-	-	-	-	-	-	-	-	Ensembl	-	-	-	-	-	-			CDC42EP1
WU_10.2_10_27726571	10:23248824-23248824	G	intergenic_variant	MODIFIER	-	-	-	-	-	-	-	-	-	-	-	-	-	-	rs335174921	-	-	-	-	-	-	-	-	-	-	-	-	-	-	-	-	-	-	-	-	-	-			LGALS2
WU_10.2_10_27885521	10:23455377-23455377	C	intron_variant	MODIFIER	KIF21B	ENSSSCG00000021706	Transcript	ENSSSCT00000031292.3	protein_coding	-	27/35	ENSSSCT00000031292.3:c.3086-581A>G	-	-	-	-	-	-	rs321513603	-	-1	-	HGNC	HGNC:29442	-	-	A2	-	ENSSSCP00000025930	-	I3LPA4	UPI001235CBB1	-	-	Ensembl	-	-	-	-	-	-			SSTR3
WU_10.2_10_27885521	10:23455377-23455377	C	intron_variant	MODIFIER	KIF21B	ENSSSCG00000021706	Transcript	ENSSSCT00000056781.2	protein_coding	-	27/33	ENSSSCT00000056781.2:c.3075-555A>G	-	-	-	-	-	-	rs321513603	-	-1	-	HGNC	HGNC:29442	-	-	A2	-	ENSSSCP00000040615	-	A0A287A9W8	UPI000BAD839B	-	-	Ensembl	-	-	-	-	-	-			IL2RB
WU_10.2_10_27885521	10:23455377-23455377	C	intron_variant	MODIFIER	KIF21B	ENSSSCG00000021706	Transcript	ENSSSCT00000060671.2	protein_coding	-	24/30	ENSSSCT00000060671.2:c.2916-555A>G	-	-	-	-	-	-	rs321513603	-	-1	-	HGNC	HGNC:29442	-	-	-	-	ENSSSCP00000048420	-	A0A287AWZ9	UPI0012370315	-	-	Ensembl	-	-	-	-	-	-			POLR3B
WU_10.2_10_27885521	10:23455377-23455377	C	intron_variant	MODIFIER	KIF21B	ENSSSCG00000021706	Transcript	ENSSSCT00000063544.2	protein_coding	-	28/34	ENSSSCT00000063544.2:c.3114-555A>G	-	-	-	-	-	-	rs321513603	-	-1	-	HGNC	HGNC:29442	-	-	P5	-	ENSSSCP00000057459	-	A0A287BLS1	UPI000BAD761D	-	-	Ensembl	-	-	-	-	-	-			RFX4
WU_10.2_10_27885521	10:23455377-23455377	C	intron_variant	MODIFIER	KIF21B	ENSSSCG00000021706	Transcript	ENSSSCT00000080953.1	protein_coding	-	25/33	ENSSSCT00000080953.1:c.2940-555A>G	-	-	-	-	-	-	rs321513603	-	-1	-	HGNC	HGNC:29442	-	-	A2	-	ENSSSCP00000070365	-	A0A5G2R1Y8	UPI0012358107	-	-	Ensembl	-	-	-	-	-	-			SPATS2
WU_10.2_10_27885521	10:23455377-23455377	C	intron_variant	MODIFIER	KIF21B	100622057	Transcript	XM_021064269.1	protein_coding	-	29/35	XM_021064269.1:c.3973-555A>G	-	-	-	-	-	-	rs321513603	-	-1	-	EntrezGene	HGNC:29442	-	-	-	-	XP_020919928.1	-	-	-	-	-	RefSeq	-	-	-	-	-	-			MYG1
WU_10.2_10_28315634	10:23835605-23835605	A	intergenic_variant	MODIFIER	-	-	-	-	-	-	-	-	-	-	-	-	-	-	rs328151575	-	-	-	-	-	-	-	-	-	-	-	-	-	-	-	-	-	-	-	-	-	-			AAAS
WU_10.2_10_28622339	10:24100315-24100315	G	intron_variant	MODIFIER	NAV1	ENSSSCG00000010915	Transcript	ENSSSCT00000011944.4	protein_coding	-	30/30	ENSSSCT00000011944.4:c.6204+475T>G	-	-	-	-	-	-	rs340074728	-	1	-	HGNC	HGNC:15989	-	-	A2	-	ENSSSCP00000011637	-	F1S5D1	UPI001236861F	-	-	Ensembl	-	-	-	-	-	-			PFDN5
WU_10.2_10_28622339	10:24100315-24100315	G	intron_variant	MODIFIER	NAV1	ENSSSCG00000010915	Transcript	ENSSSCT00000011946.4	protein_coding	-	25/25	ENSSSCT00000011946.4:c.4329+475T>G	-	-	-	-	-	-	rs340074728	-	1	-	HGNC	HGNC:15989	-	-	A2	-	ENSSSCP00000011639	-	F1S5C7	UPI000BAD8C05	-	-	Ensembl	-	-	-	-	-	-			C5H12orf10
WU_10.2_10_28622339	10:24100315-24100315	G	intron_variant	MODIFIER	NAV1	ENSSSCG00000010915	Transcript	ENSSSCT00000032914.3	protein_coding	-	28/28	ENSSSCT00000032914.3:c.*1081+475T>G	-	-	-	-	-	-	rs340074728	-	1	-	HGNC	HGNC:15989	-	-	-	-	ENSSSCP00000029220	-	K7GMX1	UPI0012344DDD	-	-	Ensembl	-	-	-	-	-	-			PDE1B
WU_10.2_10_28622339	10:24100315-24100315	G	intron_variant	MODIFIER	NAV1	ENSSSCG00000010915	Transcript	ENSSSCT00000040627.2	protein_coding	-	31/31	ENSSSCT00000040627.2:c.6402+475T>G	-	-	-	-	-	-	rs340074728	-	1	-	HGNC	HGNC:15989	-	-	P5	-	ENSSSCP00000039643	-	A0A287A797	UPI0012363CF9	-	-	Ensembl	-	-	-	-	-	-			PPP1R1A
WU_10.2_10_28622339	10:24100315-24100315	G	intron_variant	MODIFIER	NAV1	ENSSSCG00000010915	Transcript	ENSSSCT00000057767.2	protein_coding	-	32/32	ENSSSCT00000057767.2:c.5532+475T>G	-	-	-	-	-	-	rs340074728	-	1	-	HGNC	HGNC:15989	-	-	A2	-	ENSSSCP00000056377	-	A0A287BJX1	UPI001235471D	-	-	Ensembl	-	-	-	-	-	-			ARHGAP9
WU_10.2_10_28622339	10:24100315-24100315	G	intron_variant	MODIFIER	NAV1	100525121	Transcript	XM_021064510.1	protein_coding	-	32/32	XM_021064510.1:c.6393+475T>G	-	-	-	-	-	-	rs340074728	-	1	-	EntrezGene	HGNC:15989	-	-	-	-	XP_020920169.1	-	-	-	-	-	RefSeq	-	-	-	-	-	-			GLI1
WU_10.2_10_28622339	10:24100315-24100315	G	intron_variant	MODIFIER	NAV1	100525121	Transcript	XM_021064511.1	protein_coding	-	31/31	XM_021064511.1:c.6384+475T>G	-	-	-	-	-	-	rs340074728	-	1	-	EntrezGene	HGNC:15989	-	-	-	-	XP_020920170.1	-	-	-	-	-	RefSeq	-	-	-	-	-	-			MARS1
WU_10.2_10_28622339	10:24100315-24100315	G	intron_variant	MODIFIER	NAV1	100525121	Transcript	XM_021064512.1	protein_coding	-	31/31	XM_021064512.1:c.6369+475T>G	-	-	-	-	-	-	rs340074728	-	1	-	EntrezGene	HGNC:15989	-	-	-	-	XP_020920171.1	-	-	-	-	-	RefSeq	-	-	-	-	-	-			MARS
WU_10.2_10_28622339	10:24100315-24100315	G	intron_variant	MODIFIER	NAV1	100525121	Transcript	XM_021064513.1	protein_coding	-	30/30	XM_021064513.1:c.6360+475T>G	-	-	-	-	-	-	rs340074728	-	1	-	EntrezGene	HGNC:15989	-	-	-	-	XP_020920172.1	-	-	-	-	-	RefSeq	-	-	-	-	-	-			LRIG3
WU_10.2_10_28622339	10:24100315-24100315	G	intron_variant	MODIFIER	NAV1	100525121	Transcript	XM_021064514.1	protein_coding	-	31/31	XM_021064514.1:c.6222+475T>G	-	-	-	-	-	-	rs340074728	-	1	-	EntrezGene	HGNC:15989	-	-	-	-	XP_020920173.1	-	-	-	-	-	RefSeq	-	-	-	-	-	-			SRGAP1
WU_10.2_10_28622339	10:24100315-24100315	G	intron_variant	MODIFIER	NAV1	100525121	Transcript	XM_021064516.1	protein_coding	-	30/30	XM_021064516.1:c.6213+475T>G	-	-	-	-	-	-	rs340074728	-	1	-	EntrezGene	HGNC:15989	-	-	-	-	XP_020920175.1	-	-	-	-	-	RefSeq	-	-	-	-	-	-			MYRFL
WU_10.2_10_28622339	10:24100315-24100315	G	intron_variant	MODIFIER	NAV1	100525121	Transcript	XM_021064517.1	protein_coding	-	30/30	XM_021064517.1:c.6198+475T>G	-	-	-	-	-	-	rs340074728	-	1	-	EntrezGene	HGNC:15989	-	-	-	-	XP_020920176.1	-	-	-	-	-	RefSeq	-	-	-	-	-	-			PLCZ1
WU_10.2_10_28622339	10:24100315-24100315	G	intron_variant	MODIFIER	NAV1	100525121	Transcript	XM_021064518.1	protein_coding	-	29/29	XM_021064518.1:c.6189+475T>G	-	-	-	-	-	-	rs340074728	-	1	-	EntrezGene	HGNC:15989	-	-	-	-	XP_020920177.1	-	-	-	-	-	RefSeq	-	-	-	-	-	-			RERG
ASGA0047222	10:26064777-26064777	G	intergenic_variant	MODIFIER	-	-	-	-	-	-	-	-	-	-	-	-	-	-	rs81422605	-	-	-	-	-	-	-	-	-	-	-	-	-	-	-	-	-	-	-	-	-	-			ETV6
ALGA0058073	10:28484916-28484916	T	upstream_gene_variant	MODIFIER	-	ENSSSCG00000051707	Transcript	ENSSSCT00000084572.1	lncRNA	-	-	-	-	-	-	-	-	-	rs81422815	3580	-1	-	-	-	-	-	-	-	-	-	-	-	-	-	Ensembl	-	-	-	-	-	-			CD69
DRGA0010456	10:36887963-36887963	A	intron_variant	MODIFIER	LINGO2	100622878	Transcript	XM_021064187.1	protein_coding	-	1/6	XM_021064187.1:c.-490-91095G>A	-	-	-	-	-	-	rs81302500	-	1	-	EntrezGene	-	-	-	-	-	XP_020919846.1	-	-	-	-	-	RefSeq	-	-	-	-	-	-			PHC1
DRGA0010456	10:36887963-36887963	A	intron_variant	MODIFIER	LINGO2	100622878	Transcript	XM_021064188.1	protein_coding	-	1/6	XM_021064188.1:c.-490-91095G>A	-	-	-	-	-	-	rs81302500	-	1	-	EntrezGene	-	-	-	-	-	XP_020919847.1	-	-	-	-	-	RefSeq	-	-	-	-	-	-			TAPBPL
DRGA0010456	10:36887963-36887963	A	intron_variant	MODIFIER	LINGO2	100622878	Transcript	XM_021064191.1	protein_coding	-	1/6	XM_021064191.1:c.-490-91095G>A	-	-	-	-	-	-	rs81302500	-	1	-	EntrezGene	-	-	-	-	-	XP_020919850.1	-	-	-	-	-	RefSeq	-	-	-	-	-	-			CD27
DRGA0010456	10:36887963-36887963	A	intron_variant	MODIFIER	LINGO2	100622878	Transcript	XM_021064192.1	protein_coding	-	1/5	XM_021064192.1:c.-457-91095G>A	-	-	-	-	-	-	rs81302500	-	1	-	EntrezGene	-	-	-	-	-	XP_020919851.1	-	-	-	-	-	RefSeq	-	-	-	-	-	-			VAMP1
WU_10.2_10_41866712	10:36935401-36935401	A	intron_variant	MODIFIER	LINGO2	100622878	Transcript	XM_021064187.1	protein_coding	-	1/6	XM_021064187.1:c.-490-43657G>A	-	-	-	-	-	-	rs327055655	-	1	-	EntrezGene	-	-	-	-	-	XP_020919846.1	-	-	-	-	-	RefSeq	-	-	-	-	-	-			TSPAN9
WU_10.2_10_41866712	10:36935401-36935401	A	intron_variant	MODIFIER	LINGO2	100622878	Transcript	XM_021064188.1	protein_coding	-	1/6	XM_021064188.1:c.-490-43657G>A	-	-	-	-	-	-	rs327055655	-	1	-	EntrezGene	-	-	-	-	-	XP_020919847.1	-	-	-	-	-	RefSeq	-	-	-	-	-	-			CACNA1C
WU_10.2_10_41866712	10:36935401-36935401	A	intron_variant	MODIFIER	LINGO2	100622878	Transcript	XM_021064189.1	protein_coding	-	1/6	XM_021064189.1:c.-491+21661G>A	-	-	-	-	-	-	rs327055655	-	1	-	EntrezGene	-	-	-	-	-	XP_020919848.1	-	-	-	-	-	RefSeq	-	-	-	-	-	-			SLC38A1
WU_10.2_10_41866712	10:36935401-36935401	A	intron_variant	MODIFIER	LINGO2	100622878	Transcript	XM_021064190.1	protein_coding	-	2/7	XM_021064190.1:c.-491+21661G>A	-	-	-	-	-	-	rs327055655	-	1	-	EntrezGene	-	-	-	-	-	XP_020919849.1	-	-	-	-	-	RefSeq	-	-	-	-	-	-			STAB2
WU_10.2_10_41866712	10:36935401-36935401	A	intron_variant	MODIFIER	LINGO2	100622878	Transcript	XM_021064191.1	protein_coding	-	1/6	XM_021064191.1:c.-490-43657G>A	-	-	-	-	-	-	rs327055655	-	1	-	EntrezGene	-	-	-	-	-	XP_020919850.1	-	-	-	-	-	RefSeq	-	-	-	-	-	-			PAH
WU_10.2_10_41866712	10:36935401-36935401	A	intron_variant	MODIFIER	LINGO2	100622878	Transcript	XM_021064192.1	protein_coding	-	1/5	XM_021064192.1:c.-457-43657G>A	-	-	-	-	-	-	rs327055655	-	1	-	EntrezGene	-	-	-	-	-	XP_020919851.1	-	-	-	-	-	RefSeq	-	-	-	-	-	-			MYBPC1
H3GA0029961	10:37147528-37147528	T	intron_variant	MODIFIER	LINGO2	100622878	Transcript	XM_021064187.1	protein_coding	-	2/6	XM_021064187.1:c.-393-140065C>T	-	-	-	-	-	-	rs81423721	-	1	-	EntrezGene	-	-	-	-	-	XP_020919846.1	-	-	-	-	-	RefSeq	-	-	-	-	-	-			SPIC
H3GA0029961	10:37147528-37147528	T	intron_variant	MODIFIER	LINGO2	100622878	Transcript	XM_021064188.1	protein_coding	-	2/6	XM_021064188.1:c.-393-140065C>T	-	-	-	-	-	-	rs81423721	-	1	-	EntrezGene	-	-	-	-	-	XP_020919847.1	-	-	-	-	-	RefSeq	-	-	-	-	-	-			SLC5A8
H3GA0029961	10:37147528-37147528	T	intron_variant	MODIFIER	LINGO2	100622878	Transcript	XM_021064189.1	protein_coding	-	2/6	XM_021064189.1:c.-393-140065C>T	-	-	-	-	-	-	rs81423721	-	1	-	EntrezGene	-	-	-	-	-	XP_020919848.1	-	-	-	-	-	RefSeq	-	-	-	-	-	-			SLC17A8
H3GA0029961	10:37147528-37147528	T	intron_variant	MODIFIER	LINGO2	100622878	Transcript	XM_021064190.1	protein_coding	-	3/7	XM_021064190.1:c.-393-140065C>T	-	-	-	-	-	-	rs81423721	-	1	-	EntrezGene	-	-	-	-	-	XP_020919849.1	-	-	-	-	-	RefSeq	-	-	-	-	-	-			ANKS1B
H3GA0029961	10:37147528-37147528	T	intron_variant	MODIFIER	LINGO2	100622878	Transcript	XM_021064191.1	protein_coding	-	2/6	XM_021064191.1:c.-393-140065C>T	-	-	-	-	-	-	rs81423721	-	1	-	EntrezGene	-	-	-	-	-	XP_020919850.1	-	-	-	-	-	RefSeq	-	-	-	-	-	-			TMPO
H3GA0029961	10:37147528-37147528	T	intron_variant	MODIFIER	LINGO2	100622878	Transcript	XM_021064192.1	protein_coding	-	2/5	XM_021064192.1:c.-360-140065C>T	-	-	-	-	-	-	rs81423721	-	1	-	EntrezGene	-	-	-	-	-	XP_020919851.1	-	-	-	-	-	RefSeq	-	-	-	-	-	-			MGAT4C
ALGA0105339	10:37578858-37578858	T	intron_variant	MODIFIER	LINGO2	100622878	Transcript	XM_021064187.1	protein_coding	-	4/6	XM_021064187.1:c.-226-15506C>T	-	-	-	-	-	-	rs81477676	-	1	-	EntrezGene	-	-	-	-	-	XP_020919846.1	-	-	-	-	-	RefSeq	-	-	-	-	-	-			TMTC2
ALGA0105339	10:37578858-37578858	T	intron_variant	MODIFIER	LINGO2	100622878	Transcript	XM_021064188.1	protein_coding	-	4/6	XM_021064188.1:c.-226-15506C>T	-	-	-	-	-	-	rs81477676	-	1	-	EntrezGene	-	-	-	-	-	XP_020919847.1	-	-	-	-	-	RefSeq	-	-	-	-	-	-			OTOGL
ALGA0105339	10:37578858-37578858	T	intron_variant	MODIFIER	LINGO2	100622878	Transcript	XM_021064189.1	protein_coding	-	4/6	XM_021064189.1:c.-226-15506C>T	-	-	-	-	-	-	rs81477676	-	1	-	EntrezGene	-	-	-	-	-	XP_020919848.1	-	-	-	-	-	RefSeq	-	-	-	-	-	-			SPIRE2
ALGA0105339	10:37578858-37578858	T	intron_variant	MODIFIER	LINGO2	100622878	Transcript	XM_021064190.1	protein_coding	-	5/7	XM_021064190.1:c.-226-15506C>T	-	-	-	-	-	-	rs81477676	-	1	-	EntrezGene	-	-	-	-	-	XP_020919849.1	-	-	-	-	-	RefSeq	-	-	-	-	-	-			KIAA0513
ALGA0105339	10:37578858-37578858	T	intron_variant	MODIFIER	LINGO2	100622878	Transcript	XM_021064191.1	protein_coding	-	4/6	XM_021064191.1:c.-226-15506C>T	-	-	-	-	-	-	rs81477676	-	1	-	EntrezGene	-	-	-	-	-	XP_020919850.1	-	-	-	-	-	RefSeq	-	-	-	-	-	-			TLDC1
ALGA0105339	10:37578858-37578858	T	intron_variant	MODIFIER	LINGO2	100622878	Transcript	XM_021064192.1	protein_coding	-	4/5	XM_021064192.1:c.-194+110249C>T	-	-	-	-	-	-	rs81477676	-	1	-	EntrezGene	-	-	-	-	-	XP_020919851.1	-	-	-	-	-	RefSeq	-	-	-	-	-	-			KCNG4
ALGA0105339	10:37578858-37578858	T	intron_variant	MODIFIER	LINGO2	100622878	Transcript	XM_021064193.1	protein_coding	-	2/4	XM_021064193.1:c.-226-15506C>T	-	-	-	-	-	-	rs81477676	-	1	-	EntrezGene	-	-	-	-	-	XP_020919852.1	-	-	-	-	-	RefSeq	-	-	-	-	-	-			CDH13
WU_10.2_10_43177035	10:38037640-38037640	T	non_coding_transcript_exon_variant	MODIFIER	-	ENSSSCG00000049533	Transcript	ENSSSCT00000069644.1	lncRNA	2/2	-	ENSSSCT00000069644.1:n.4662C>T	-	4662	-	-	-	-	rs338434249	-	1	-	-	-	-	-	-	-	-	-	-	-	-	-	Ensembl	-	-	-	-	-	-			CMIP
WU_10.2_10_43177035	10:38037640-38037640	T	upstream_gene_variant	MODIFIER	-	ENSSSCG00000047356	Transcript	ENSSSCT00000084076.1	lncRNA	-	-	-	-	-	-	-	-	-	rs338434249	979	-1	-	-	-	-	-	-	-	-	-	-	-	-	-	Ensembl	-	-	-	-	-	-			LOC110260907
ALGA0058520	10:38433009-38433009	C	upstream_gene_variant	MODIFIER	MOB3B	100516148	Transcript	XM_003130696.6	protein_coding	-	-	-	-	-	-	-	-	-	rs81423838	4924	1	-	EntrezGene	-	-	-	-	-	XP_003130744.3	-	-	-	-	-	RefSeq	-	-	-	-	-	-			CDYL2
WU_10.2_10_43831982	10:38682203-38682203	C	downstream_gene_variant	MODIFIER	MOB3B	ENSSSCG00000038811	Transcript	ENSSSCT00000048745.2	protein_coding	-	-	-	-	-	-	-	-	-	rs343937117	1208	1	-	HGNC	HGNC:23825	-	-	P5	-	ENSSSCP00000055867	-	A0A287BH56	UPI0012361EE9	-	-	Ensembl	-	-	-	-	-	-			LOC106510465
WU_10.2_10_43831982	10:38682203-38682203	C	downstream_gene_variant	MODIFIER	MOB3B	ENSSSCG00000038811	Transcript	ENSSSCT00000050048.2	protein_coding	-	-	-	-	-	-	-	-	-	rs343937117	1166	1	-	HGNC	HGNC:23825	-	-	A2	-	ENSSSCP00000054788	-	A0A287BE32	UPI0002382037	-	-	Ensembl	-	-	-	-	-	-			TERF2IP
WU_10.2_10_43831982	10:38682203-38682203	C	downstream_gene_variant	MODIFIER	MOB3B	100516148	Transcript	XM_003130696.6	protein_coding	-	-	-	-	-	-	-	-	-	rs343937117	2085	1	-	EntrezGene	HGNC:23825	-	-	-	-	XP_003130744.3	-	-	-	-	-	RefSeq	-	-	-	-	-	-			ADAT1
WU_10.2_10_43831982	10:38682203-38682203	C	downstream_gene_variant	MODIFIER	MOB3B	100516148	Transcript	XM_013980202.2	protein_coding	-	-	-	-	-	-	-	-	-	rs343937117	2085	1	-	EntrezGene	HGNC:23825	-	-	-	-	XP_013835656.2	-	-	-	-	-	RefSeq	-	-	-	-	-	-			GABARAPL2
WU_10.2_10_43831982	10:38682203-38682203	C	intron_variant	MODIFIER	MOB3B	100516148	Transcript	XM_021064706.1	protein_coding	-	3/3	XM_021064706.1:c.622-12444T>C	-	-	-	-	-	-	rs343937117	-	1	-	EntrezGene	HGNC:23825	-	-	-	-	XP_020920365.1	-	-	-	-	-	RefSeq	-	-	-	-	-	-			PDPR
WU_10.2_10_43938002	10:38749231-38749231	G	intergenic_variant	MODIFIER	-	-	-	-	-	-	-	-	-	-	-	-	-	-	rs329050875	-	-	-	-	-	-	-	-	-	-	-	-	-	-	-	-	-	-	-	-	-	-			DHX38
WU_10.2_10_53806841	10:38942448-38942448	A	upstream_gene_variant	MODIFIER	PTCHD3	100620580	Transcript	XM_021064277.1	protein_coding	-	-	-	-	-	-	-	-	-	rs342466148	4965	-1	-	EntrezGene	-	-	-	-	-	XP_020919936.1	-	-	-	-	-	RefSeq	-	-	-	-	-	-			PMFBP1
ASGA0092634	10:39705230-39705230	A	intron_variant	MODIFIER	MPP7	ENSSSCG00000011070	Transcript	ENSSSCT00000012114.4	protein_coding	-	2/17	ENSSSCT00000012114.4:c.38-3091C>T	-	-	-	-	-	-	rs81311412	-	-1	-	HGNC	HGNC:26542	-	-	-	-	ENSSSCP00000011806	-	F1RVJ7	UPI000A2AF73D	-	-	Ensembl	-	-	-	-	-	-			ZFHX3
ASGA0092634	10:39705230-39705230	A	upstream_gene_variant	MODIFIER	MPP7	ENSSSCG00000011070	Transcript	ENSSSCT00000039877.2	protein_coding	-	-	-	-	-	-	-	-	-	rs81311412	2150	-1	-	HGNC	HGNC:26542	-	-	-	-	ENSSSCP00000032677	-	A0A286ZM89	UPI001235C8DD	-	-	Ensembl	-	-	-	-	-	-			WWP2
ASGA0092634	10:39705230-39705230	A	upstream_gene_variant	MODIFIER	MPP7	ENSSSCG00000011070	Transcript	ENSSSCT00000054442.2	protein_coding	-	-	-	-	-	-	-	-	-	rs81311412	2150	-1	-	HGNC	HGNC:26542	-	-	-	-	ENSSSCP00000051730	-	A0A287B6J9	UPI001235742A	-	-	Ensembl	-	-	-	-	-	-			KIFC3
ASGA0092634	10:39705230-39705230	A	intron_variant	MODIFIER	MPP7	ENSSSCG00000011070	Transcript	ENSSSCT00000057635.2	protein_coding	-	2/19	ENSSSCT00000057635.2:c.38-3091C>T	-	-	-	-	-	-	rs81311412	-	-1	-	HGNC	HGNC:26542	-	-	P1	-	ENSSSCP00000046356	-	A0A287AR23	UPI000A2B55BE	-	-	Ensembl	-	-	-	-	-	-			KATNB1
ASGA0092634	10:39705230-39705230	A	intron_variant	MODIFIER	MPP7	ENSSSCG00000011070	Transcript	ENSSSCT00000079353.1	protein_coding	-	3/14	ENSSSCT00000079353.1:c.38-3091C>T	-	-	-	-	-	-	rs81311412	-	-1	-	HGNC	HGNC:26542	-	-	-	-	ENSSSCP00000068069	-	A0A5G2RBS5	UPI001236782B	-	-	Ensembl	-	-	-	-	-	-			CFAP20
ASGA0092634	10:39705230-39705230	A	intron_variant	MODIFIER	MPP7	ENSSSCG00000011070	Transcript	ENSSSCT00000087411.1	protein_coding	-	3/16	ENSSSCT00000087411.1:c.38-3091C>T	-	-	-	-	-	-	rs81311412	-	-1	-	HGNC	HGNC:26542	-	-	-	-	ENSSSCP00000067027	-	A0A480NKW6	UPI0010B5D8F4	-	-	Ensembl	-	-	-	-	-	-			USB1
ASGA0092634	10:39705230-39705230	A	intron_variant	MODIFIER	MPP7	100516752	Transcript	XM_021064727.1	protein_coding	-	2/19	XM_021064727.1:c.38-3091C>T	-	-	-	-	-	-	rs81311412	-	-1	-	EntrezGene	HGNC:26542	-	-	-	-	XP_020920386.1	-	-	-	-	-	RefSeq	-	-	-	-	-	-			ZNF319
ASGA0092634	10:39705230-39705230	A	intron_variant	MODIFIER	MPP7	100516752	Transcript	XM_021064728.1	protein_coding	-	2/19	XM_021064728.1:c.38-3091C>T	-	-	-	-	-	-	rs81311412	-	-1	-	EntrezGene	HGNC:26542	-	-	-	-	XP_020920387.1	-	-	-	-	-	RefSeq	-	-	-	-	-	-			CNGB1
ASGA0092634	10:39705230-39705230	A	intron_variant	MODIFIER	MPP7	100516752	Transcript	XM_021064729.1	protein_coding	-	2/19	XM_021064729.1:c.38-3091C>T	-	-	-	-	-	-	rs81311412	-	-1	-	EntrezGene	HGNC:26542	-	-	-	-	XP_020920388.1	-	-	-	-	-	RefSeq	-	-	-	-	-	-			NDRG4
ASGA0092634	10:39705230-39705230	A	intron_variant	MODIFIER	MPP7	100516752	Transcript	XM_021064730.1	protein_coding	-	2/19	XM_021064730.1:c.38-3091C>T	-	-	-	-	-	-	rs81311412	-	-1	-	EntrezGene	HGNC:26542	-	-	-	-	XP_020920389.1	-	-	-	-	-	RefSeq	-	-	-	-	-	-			CDH8
ASGA0092634	10:39705230-39705230	A	intron_variant	MODIFIER	MPP7	100516752	Transcript	XM_021064731.1	protein_coding	-	2/19	XM_021064731.1:c.38-3091C>T	-	-	-	-	-	-	rs81311412	-	-1	-	EntrezGene	HGNC:26542	-	-	-	-	XP_020920390.1	-	-	-	-	-	RefSeq	-	-	-	-	-	-			FTO
ASGA0092634	10:39705230-39705230	A	intron_variant	MODIFIER	MPP7	100516752	Transcript	XM_021064732.1	protein_coding	-	2/19	XM_021064732.1:c.38-3091C>T	-	-	-	-	-	-	rs81311412	-	-1	-	EntrezGene	HGNC:26542	-	-	-	-	XP_020920391.1	-	-	-	-	-	RefSeq	-	-	-	-	-	-			ZNF536
ASGA0092634	10:39705230-39705230	A	intron_variant	MODIFIER	MPP7	100516752	Transcript	XM_021064733.1	protein_coding	-	2/17	XM_021064733.1:c.38-3091C>T	-	-	-	-	-	-	rs81311412	-	-1	-	EntrezGene	HGNC:26542	-	-	-	-	XP_020920392.1	-	-	-	-	-	RefSeq	-	-	-	-	-	-			LOC110261352
ASGA0092634	10:39705230-39705230	A	intron_variant	MODIFIER	MPP7	100516752	Transcript	XM_021064734.1	protein_coding	-	2/16	XM_021064734.1:c.38-3091C>T	-	-	-	-	-	-	rs81311412	-	-1	-	EntrezGene	HGNC:26542	-	-	-	-	XP_020920393.1	-	-	-	-	-	RefSeq	-	-	-	-	-	-			LOC100737142
ASGA0082793	10:39716708-39716708	T	intron_variant	MODIFIER	MPP7	ENSSSCG00000011070	Transcript	ENSSSCT00000012114.4	protein_coding	-	2/17	ENSSSCT00000012114.4:c.38-14569G>A	-	-	-	-	-	-	rs81333737	-	-1	-	HGNC	HGNC:26542	-	-	-	-	ENSSSCP00000011806	-	F1RVJ7	UPI000A2AF73D	-	-	Ensembl	-	-	-	-	-	-			LOC106510601
ASGA0082793	10:39716708-39716708	T	intron_variant	MODIFIER	MPP7	ENSSSCG00000011070	Transcript	ENSSSCT00000057635.2	protein_coding	-	2/19	ENSSSCT00000057635.2:c.38-14569G>A	-	-	-	-	-	-	rs81333737	-	-1	-	HGNC	HGNC:26542	-	-	P1	-	ENSSSCP00000046356	-	A0A287AR23	UPI000A2B55BE	-	-	Ensembl	-	-	-	-	-	-			TMEM51
ASGA0082793	10:39716708-39716708	T	intron_variant	MODIFIER	MPP7	ENSSSCG00000011070	Transcript	ENSSSCT00000079353.1	protein_coding	-	3/14	ENSSSCT00000079353.1:c.38-14569G>A	-	-	-	-	-	-	rs81333737	-	-1	-	HGNC	HGNC:26542	-	-	-	-	ENSSSCP00000068069	-	A0A5G2RBS5	UPI001236782B	-	-	Ensembl	-	-	-	-	-	-			PLEKHM2
ASGA0082793	10:39716708-39716708	T	intron_variant	MODIFIER	MPP7	ENSSSCG00000011070	Transcript	ENSSSCT00000087411.1	protein_coding	-	3/16	ENSSSCT00000087411.1:c.38-14569G>A	-	-	-	-	-	-	rs81333737	-	-1	-	HGNC	HGNC:26542	-	-	-	-	ENSSSCP00000067027	-	A0A480NKW6	UPI0010B5D8F4	-	-	Ensembl	-	-	-	-	-	-			KLHDC7A
ASGA0082793	10:39716708-39716708	T	intron_variant	MODIFIER	MPP7	100516752	Transcript	XM_021064727.1	protein_coding	-	2/19	XM_021064727.1:c.38-14569G>A	-	-	-	-	-	-	rs81333737	-	-1	-	EntrezGene	HGNC:26542	-	-	-	-	XP_020920386.1	-	-	-	-	-	RefSeq	-	-	-	-	-	-			TMCO4
ASGA0082793	10:39716708-39716708	T	intron_variant	MODIFIER	MPP7	100516752	Transcript	XM_021064728.1	protein_coding	-	2/19	XM_021064728.1:c.38-14569G>A	-	-	-	-	-	-	rs81333737	-	-1	-	EntrezGene	HGNC:26542	-	-	-	-	XP_020920387.1	-	-	-	-	-	RefSeq	-	-	-	-	-	-			PINK1
ASGA0082793	10:39716708-39716708	T	intron_variant	MODIFIER	MPP7	100516752	Transcript	XM_021064729.1	protein_coding	-	2/19	XM_021064729.1:c.38-14569G>A	-	-	-	-	-	-	rs81333737	-	-1	-	EntrezGene	HGNC:26542	-	-	-	-	XP_020920388.1	-	-	-	-	-	RefSeq	-	-	-	-	-	-			CDA
ASGA0082793	10:39716708-39716708	T	intron_variant	MODIFIER	MPP7	100516752	Transcript	XM_021064730.1	protein_coding	-	2/19	XM_021064730.1:c.38-14569G>A	-	-	-	-	-	-	rs81333737	-	-1	-	EntrezGene	HGNC:26542	-	-	-	-	XP_020920389.1	-	-	-	-	-	RefSeq	-	-	-	-	-	-			DDOST
ASGA0082793	10:39716708-39716708	T	intron_variant	MODIFIER	MPP7	100516752	Transcript	XM_021064731.1	protein_coding	-	2/19	XM_021064731.1:c.38-14569G>A	-	-	-	-	-	-	rs81333737	-	-1	-	EntrezGene	HGNC:26542	-	-	-	-	XP_020920390.1	-	-	-	-	-	RefSeq	-	-	-	-	-	-			KIF17
ASGA0082793	10:39716708-39716708	T	intron_variant	MODIFIER	MPP7	100516752	Transcript	XM_021064732.1	protein_coding	-	2/19	XM_021064732.1:c.38-14569G>A	-	-	-	-	-	-	rs81333737	-	-1	-	EntrezGene	HGNC:26542	-	-	-	-	XP_020920391.1	-	-	-	-	-	RefSeq	-	-	-	-	-	-			ELOA
ASGA0082793	10:39716708-39716708	T	intron_variant	MODIFIER	MPP7	100516752	Transcript	XM_021064733.1	protein_coding	-	2/17	XM_021064733.1:c.38-14569G>A	-	-	-	-	-	-	rs81333737	-	-1	-	EntrezGene	HGNC:26542	-	-	-	-	XP_020920392.1	-	-	-	-	-	RefSeq	-	-	-	-	-	-			NIPAL3
ASGA0082793	10:39716708-39716708	T	intron_variant	MODIFIER	MPP7	100516752	Transcript	XM_021064734.1	protein_coding	-	2/16	XM_021064734.1:c.38-14569G>A	-	-	-	-	-	-	rs81333737	-	-1	-	EntrezGene	HGNC:26542	-	-	-	-	XP_020920393.1	-	-	-	-	-	RefSeq	-	-	-	-	-	-			EPB41
WU_10.2_10_44189154	10:40001400-40001400	A	intron_variant	MODIFIER	WAC	ENSSSCG00000011013	Transcript	ENSSSCT00000012055.4	protein_coding	-	8/14	ENSSSCT00000012055.4:c.919+5391G>A	-	-	-	-	-	-	rs341968009	-	1	-	HGNC	HGNC:17327	-	-	-	-	ENSSSCP00000011747	-	F1SE54	UPI0002106401	-	-	Ensembl	-	-	-	-	-	-			SRSF4
WU_10.2_10_44189154	10:40001400-40001400	A	intron_variant	MODIFIER	WAC	ENSSSCG00000011013	Transcript	ENSSSCT00000024775.3	protein_coding	-	6/12	ENSSSCT00000024775.3:c.476-7168G>A	-	-	-	-	-	-	rs341968009	-	1	-	HGNC	HGNC:17327	-	-	P1	-	ENSSSCP00000022445	-	I3LEF7	UPI001235E9F6	-	-	Ensembl	-	-	-	-	-	-			SDC3
WU_10.2_10_44189154	10:40001400-40001400	A	intron_variant	MODIFIER	WAC	ENSSSCG00000011013	Transcript	ENSSSCT00000049530.2	protein_coding	-	8/13	ENSSSCT00000049530.2:c.919+5391G>A	-	-	-	-	-	-	rs341968009	-	1	-	HGNC	HGNC:17327	-	-	-	-	ENSSSCP00000056294	-	A0A287BID3	UPI0012368EDC	-	-	Ensembl	-	-	-	-	-	-			ZCCHC17
WU_10.2_10_44189154	10:40001400-40001400	A	intron_variant	MODIFIER	WAC	ENSSSCG00000011013	Transcript	ENSSSCT00000063562.2	protein_coding	-	7/14	ENSSSCT00000063562.2:c.*345+5391G>A	-	-	-	-	-	-	rs341968009	-	1	-	HGNC	HGNC:17327	-	-	-	-	ENSSSCP00000046903	-	A0A287AS60	UPI0012343C0A	-	-	Ensembl	-	-	-	-	-	-			LOC100520618
WU_10.2_10_44189154	10:40001400-40001400	A	intron_variant	MODIFIER	WAC	ENSSSCG00000011013	Transcript	ENSSSCT00000087183.1	protein_coding	-	8/13	ENSSSCT00000087183.1:c.919+5391G>A	-	-	-	-	-	-	rs341968009	-	1	-	HGNC	HGNC:17327	-	-	-	-	ENSSSCP00000064782	-	A0A5G2QRY5	UPI000BADA98A	-	-	Ensembl	-	-	-	-	-	-			AGO1
WU_10.2_10_44189154	10:40001400-40001400	A	intron_variant	MODIFIER	WAC	100517599	Transcript	XM_003130704.5	protein_coding	-	7/13	XM_003130704.5:c.919+5391G>A	-	-	-	-	-	-	rs341968009	-	1	-	EntrezGene	HGNC:17327	-	-	-	-	XP_003130752.4	-	-	-	-	-	RefSeq	-	-	-	-	-	-			AGO3
WU_10.2_10_44189154	10:40001400-40001400	A	intron_variant	MODIFIER	WAC	100517599	Transcript	XM_013980204.2	protein_coding	-	7/13	XM_013980204.2:c.937+5391G>A	-	-	-	-	-	-	rs341968009	-	1	-	EntrezGene	HGNC:17327	-	-	-	-	XP_013835658.1	-	-	-	-	-	RefSeq	-	-	-	-	-	-			GNAL
WU_10.2_10_44189154	10:40001400-40001400	A	intron_variant	MODIFIER	WAC	100517599	Transcript	XM_013980205.2	protein_coding	-	7/13	XM_013980205.2:c.784+5391G>A	-	-	-	-	-	-	rs341968009	-	1	-	EntrezGene	HGNC:17327	-	-	-	-	XP_013835659.1	-	-	-	-	-	RefSeq	-	-	-	-	-	-			DLGAP1
WU_10.2_10_44189154	10:40001400-40001400	A	intron_variant	MODIFIER	WAC	100517599	Transcript	XM_013980206.2	protein_coding	-	6/12	XM_013980206.2:c.629-7168G>A	-	-	-	-	-	-	rs341968009	-	1	-	EntrezGene	HGNC:17327	-	-	-	-	XP_013835660.1	-	-	-	-	-	RefSeq	-	-	-	-	-	-			KIAA1328
WU_10.2_10_44189154	10:40001400-40001400	A	intron_variant	MODIFIER	WAC	100517599	Transcript	XM_013980207.2	protein_coding	-	6/12	XM_013980207.2:c.611-7168G>A	-	-	-	-	-	-	rs341968009	-	1	-	EntrezGene	HGNC:17327	-	-	-	-	XP_013835661.1	-	-	-	-	-	RefSeq	-	-	-	-	-	-			ADGRL2
WU_10.2_10_44498792	10:40169894-40169894	T	intergenic_variant	MODIFIER	-	-	-	-	-	-	-	-	-	-	-	-	-	-	rs342556822	-	-	-	-	-	-	-	-	-	-	-	-	-	-	-	-	-	-	-	-	-	-			TM2D1
ASGA0096596	10:40460035-40460035	T	intergenic_variant	MODIFIER	-	-	-	-	-	-	-	-	-	-	-	-	-	-	rs81316358	-	-	-	-	-	-	-	-	-	-	-	-	-	-	-	-	-	-	-	-	-	-			NFIA
WU_10.2_10_44896081	10:40513488-40513488	C	intergenic_variant	MODIFIER	-	-	-	-	-	-	-	-	-	-	-	-	-	-	rs334139293	-	-	-	-	-	-	-	-	-	-	-	-	-	-	-	-	-	-	-	-	-	-			DAB1
WU_10.2_10_45953638	10:41386422-41386422	A	intron_variant	MODIFIER	SVIL	ENSSSCG00000011022	Transcript	ENSSSCT00000012064.4	protein_coding	-	8/34	ENSSSCT00000012064.4:c.2190-368G>A	-	-	-	-	-	-	rs326430961	-	1	-	HGNC	HGNC:11480	-	-	A2	-	ENSSSCP00000011756	-	F1RWD9	UPI001236637A	-	-	Ensembl	-	-	-	-	-	-			SLC5A9
WU_10.2_10_45953638	10:41386422-41386422	A	intron_variant	MODIFIER	SVIL	ENSSSCG00000011022	Transcript	ENSSSCT00000012066.4	protein_coding	-	14/40	ENSSSCT00000012066.4:c.2082-368G>A	-	-	-	-	-	-	rs326430961	-	1	-	HGNC	HGNC:11480	-	-	A2	-	ENSSSCP00000011758	-	F1RWD6	UPI0010B71BA1	-	-	Ensembl	-	-	-	-	-	-			TRABD2B
WU_10.2_10_45953638	10:41386422-41386422	A	intron_variant	MODIFIER	SVIL	ENSSSCG00000011022	Transcript	ENSSSCT00000039032.2	protein_coding	-	12/37	ENSSSCT00000039032.2:c.2157-368G>A	-	-	-	-	-	-	rs326430961	-	1	-	HGNC	HGNC:11480	-	-	A2	-	ENSSSCP00000048567	-	A0A287AXE7	UPI0010BB5F4D	-	-	Ensembl	-	-	-	-	-	-			RNF220
WU_10.2_10_45953638	10:41386422-41386422	A	intron_variant	MODIFIER	SVIL	ENSSSCG00000011022	Transcript	ENSSSCT00000043975.2	protein_coding	-	15/41	ENSSSCT00000043975.2:c.2253-368G>A	-	-	-	-	-	-	rs326430961	-	1	-	HGNC	HGNC:11480	-	-	P5	-	ENSSSCP00000059351	-	A0A287BT51	UPI000A2B5FEF	-	-	Ensembl	-	-	-	-	-	-			TUBB2B
WU_10.2_10_45953638	10:41386422-41386422	A	intron_variant	MODIFIER	SVIL	ENSSSCG00000011022	Transcript	ENSSSCT00000049497.2	protein_coding	-	13/38	ENSSSCT00000049497.2:c.2253-368G>A	-	-	-	-	-	-	rs326430961	-	1	-	HGNC	HGNC:11480	-	-	A2	-	ENSSSCP00000037339	-	A0A287A071	UPI000A2B2BDE	-	-	Ensembl	-	-	-	-	-	-			LOC110261696
WU_10.2_10_45953638	10:41386422-41386422	A	intron_variant	MODIFIER	SVIL	ENSSSCG00000011022	Transcript	ENSSSCT00000061647.2	protein_coding	-	5/29	ENSSSCT00000061647.2:c.1869-368G>A	-	-	-	-	-	-	rs326430961	-	1	-	HGNC	HGNC:11480	-	-	A2	-	ENSSSCP00000035148	-	A0A286ZU47	UPI0012355AA4	-	-	Ensembl	-	-	-	-	-	-			CAGE1
WU_10.2_10_45953638	10:41386422-41386422	A	intron_variant	MODIFIER	SVIL	ENSSSCG00000011022	Transcript	ENSSSCT00000066269.2	protein_coding	-	9/34	ENSSSCT00000066269.2:c.1236-368G>A	-	-	-	-	-	-	rs326430961	-	1	-	HGNC	HGNC:11480	-	-	A2	-	ENSSSCP00000055534	-	A0A287BHD1	UPI0012362727	-	-	Ensembl	-	-	-	-	-	-			ELOVL2
WU_10.2_10_45953638	10:41386422-41386422	A	intron_variant	MODIFIER	SVIL	100518681	Transcript	XM_005668092.3	protein_coding	-	13/37	XM_005668092.3:c.2514-368G>A	-	-	-	-	-	-	rs326430961	-	1	-	EntrezGene	HGNC:11480	-	-	-	-	XP_005668149.2	-	-	-	-	-	RefSeq	-	-	-	-	-	-			CD83
WU_10.2_10_45953638	10:41386422-41386422	A	intron_variant	MODIFIER	SVIL	100518681	Transcript	XM_005668093.3	protein_coding	-	9/33	XM_005668093.3:c.1284-368G>A	-	-	-	-	-	-	rs326430961	-	1	-	EntrezGene	HGNC:11480	-	-	-	-	XP_005668150.2	-	-	-	-	-	RefSeq	-	-	-	-	-	-			KIF13A
WU_10.2_10_45953638	10:41386422-41386422	A	intron_variant	MODIFIER	SVIL	100518681	Transcript	XM_013980213.2	protein_coding	-	12/36	XM_013980213.2:c.2418-368G>A	-	-	-	-	-	-	rs326430961	-	1	-	EntrezGene	HGNC:11480	-	-	-	-	XP_013835667.1	-	-	-	-	-	RefSeq	-	-	-	-	-	-			NRSN1
WU_10.2_10_45953638	10:41386422-41386422	A	intron_variant	MODIFIER	SVIL	100518681	Transcript	XM_021064745.1	protein_coding	-	13/39	XM_021064745.1:c.2514-368G>A	-	-	-	-	-	-	rs326430961	-	1	-	EntrezGene	HGNC:11480	-	-	-	-	XP_020920404.1	-	-	-	-	-	RefSeq	-	-	-	-	-	-			H2AC17
WU_10.2_10_45953638	10:41386422-41386422	A	intron_variant	MODIFIER	SVIL	100518681	Transcript	XM_021064746.1	protein_coding	-	13/39	XM_021064746.1:c.2466-368G>A	-	-	-	-	-	-	rs326430961	-	1	-	EntrezGene	HGNC:11480	-	-	-	-	XP_020920405.1	-	-	-	-	-	RefSeq	-	-	-	-	-	-			LOC100156552
WU_10.2_10_45953638	10:41386422-41386422	A	intron_variant	MODIFIER	SVIL	100518681	Transcript	XM_021064747.1	protein_coding	-	13/39	XM_021064747.1:c.2463-368G>A	-	-	-	-	-	-	rs326430961	-	1	-	EntrezGene	HGNC:11480	-	-	-	-	XP_020920406.1	-	-	-	-	-	RefSeq	-	-	-	-	-	-			GABBR1
WU_10.2_10_45953638	10:41386422-41386422	A	intron_variant	MODIFIER	SVIL	100518681	Transcript	XM_021064748.1	protein_coding	-	13/38	XM_021064748.1:c.2514-368G>A	-	-	-	-	-	-	rs326430961	-	1	-	EntrezGene	HGNC:11480	-	-	-	-	XP_020920407.1	-	-	-	-	-	RefSeq	-	-	-	-	-	-			OLF42-1
WU_10.2_10_45953638	10:41386422-41386422	A	intron_variant	MODIFIER	SVIL	100518681	Transcript	XM_021064749.1	protein_coding	-	12/38	XM_021064749.1:c.2418-368G>A	-	-	-	-	-	-	rs326430961	-	1	-	EntrezGene	HGNC:11480	-	-	-	-	XP_020920408.1	-	-	-	-	-	RefSeq	-	-	-	-	-	-			PPP1R10
WU_10.2_10_45953638	10:41386422-41386422	A	intron_variant	MODIFIER	SVIL	100518681	Transcript	XM_021064750.1	protein_coding	-	12/38	XM_021064750.1:c.2343-368G>A	-	-	-	-	-	-	rs326430961	-	1	-	EntrezGene	HGNC:11480	-	-	-	-	XP_020920409.1	-	-	-	-	-	RefSeq	-	-	-	-	-	-			NOTCH4
WU_10.2_10_45953638	10:41386422-41386422	A	intron_variant	MODIFIER	SVIL	100518681	Transcript	XM_021064751.1	protein_coding	-	12/37	XM_021064751.1:c.2418-368G>A	-	-	-	-	-	-	rs326430961	-	1	-	EntrezGene	HGNC:11480	-	-	-	-	XP_020920410.1	-	-	-	-	-	RefSeq	-	-	-	-	-	-			LOC100513868
WU_10.2_10_45953638	10:41386422-41386422	A	intron_variant	MODIFIER	SVIL	100518681	Transcript	XM_021064753.1	protein_coding	-	15/41	XM_021064753.1:c.2253-368G>A	-	-	-	-	-	-	rs326430961	-	1	-	EntrezGene	HGNC:11480	-	-	-	-	XP_020920412.1	-	-	-	-	-	RefSeq	-	-	-	-	-	-			BMP5
WU_10.2_10_45953638	10:41386422-41386422	A	intron_variant	MODIFIER	SVIL	100518681	Transcript	XM_021064754.1	protein_coding	-	15/41	XM_021064754.1:c.2253-368G>A	-	-	-	-	-	-	rs326430961	-	1	-	EntrezGene	HGNC:11480	-	-	-	-	XP_020920413.1	-	-	-	-	-	RefSeq	-	-	-	-	-	-			MLIP
WU_10.2_10_45953638	10:41386422-41386422	A	intron_variant	MODIFIER	SVIL	100518681	Transcript	XM_021064755.1	protein_coding	-	15/41	XM_021064755.1:c.2253-368G>A	-	-	-	-	-	-	rs326430961	-	1	-	EntrezGene	HGNC:11480	-	-	-	-	XP_020920414.1	-	-	-	-	-	RefSeq	-	-	-	-	-	-			LOC102165560
WU_10.2_10_45953638	10:41386422-41386422	A	intron_variant	MODIFIER	SVIL	100518681	Transcript	XM_021064756.1	protein_coding	-	15/41	XM_021064756.1:c.2253-368G>A	-	-	-	-	-	-	rs326430961	-	1	-	EntrezGene	HGNC:11480	-	-	-	-	XP_020920415.1	-	-	-	-	-	RefSeq	-	-	-	-	-	-			ZFAND3
WU_10.2_10_45953638	10:41386422-41386422	A	intron_variant	MODIFIER	SVIL	100518681	Transcript	XM_021064757.1	protein_coding	-	15/41	XM_021064757.1:c.2253-368G>A	-	-	-	-	-	-	rs326430961	-	1	-	EntrezGene	HGNC:11480	-	-	-	-	XP_020920416.1	-	-	-	-	-	RefSeq	-	-	-	-	-	-			DNAH8
WU_10.2_10_45953638	10:41386422-41386422	A	intron_variant	MODIFIER	SVIL	100518681	Transcript	XM_021064758.1	protein_coding	-	15/41	XM_021064758.1:c.2253-368G>A	-	-	-	-	-	-	rs326430961	-	1	-	EntrezGene	HGNC:11480	-	-	-	-	XP_020920417.1	-	-	-	-	-	RefSeq	-	-	-	-	-	-			CCND3
WU_10.2_10_45953638	10:41386422-41386422	A	intron_variant	MODIFIER	SVIL	100518681	Transcript	XM_021064759.1	protein_coding	-	15/41	XM_021064759.1:c.2253-368G>A	-	-	-	-	-	-	rs326430961	-	1	-	EntrezGene	HGNC:11480	-	-	-	-	XP_020920418.1	-	-	-	-	-	RefSeq	-	-	-	-	-	-			SLC35B2
WU_10.2_10_45953638	10:41386422-41386422	A	intron_variant	MODIFIER	SVIL	100518681	Transcript	XM_021064760.1	protein_coding	-	15/41	XM_021064760.1:c.2253-368G>A	-	-	-	-	-	-	rs326430961	-	1	-	EntrezGene	HGNC:11480	-	-	-	-	XP_020920419.1	-	-	-	-	-	RefSeq	-	-	-	-	-	-			NFKBIE
WU_10.2_10_45953638	10:41386422-41386422	A	intron_variant	MODIFIER	SVIL	100518681	Transcript	XM_021064761.1	protein_coding	-	16/42	XM_021064761.1:c.2253-368G>A	-	-	-	-	-	-	rs326430961	-	1	-	EntrezGene	HGNC:11480	-	-	-	-	XP_020920420.1	-	-	-	-	-	RefSeq	-	-	-	-	-	-			HSP90AB1
WU_10.2_10_45953638	10:41386422-41386422	A	intron_variant	MODIFIER	SVIL	100518681	Transcript	XM_021064762.1	protein_coding	-	17/43	XM_021064762.1:c.2253-368G>A	-	-	-	-	-	-	rs326430961	-	1	-	EntrezGene	HGNC:11480	-	-	-	-	XP_020920421.1	-	-	-	-	-	RefSeq	-	-	-	-	-	-			CRISP3
WU_10.2_10_45953638	10:41386422-41386422	A	intron_variant	MODIFIER	SVIL	100518681	Transcript	XM_021064763.1	protein_coding	-	14/40	XM_021064763.1:c.2253-368G>A	-	-	-	-	-	-	rs326430961	-	1	-	EntrezGene	HGNC:11480	-	-	-	-	XP_020920422.1	-	-	-	-	-	RefSeq	-	-	-	-	-	-			TFAP2B
WU_10.2_10_45953638	10:41386422-41386422	A	intron_variant	MODIFIER	SVIL	100518681	Transcript	XM_021064764.1	protein_coding	-	13/39	XM_021064764.1:c.2253-368G>A	-	-	-	-	-	-	rs326430961	-	1	-	EntrezGene	HGNC:11480	-	-	-	-	XP_020920423.1	-	-	-	-	-	RefSeq	-	-	-	-	-	-			CILK1
WU_10.2_10_45953638	10:41386422-41386422	A	intron_variant	MODIFIER	SVIL	100518681	Transcript	XM_021064765.1	protein_coding	-	13/38	XM_021064765.1:c.2253-368G>A	-	-	-	-	-	-	rs326430961	-	1	-	EntrezGene	HGNC:11480	-	-	-	-	XP_020920424.1	-	-	-	-	-	RefSeq	-	-	-	-	-	-			ICK
WU_10.2_10_45953638	10:41386422-41386422	A	intron_variant	MODIFIER	SVIL	100518681	Transcript	XM_021064766.1	protein_coding	-	11/36	XM_021064766.1:c.2247-368G>A	-	-	-	-	-	-	rs326430961	-	1	-	EntrezGene	HGNC:11480	-	-	-	-	XP_020920425.1	-	-	-	-	-	RefSeq	-	-	-	-	-	-			LOC110261744
WU_10.2_10_45953638	10:41386422-41386422	A	intron_variant	MODIFIER	SVIL	100518681	Transcript	XM_021064767.1	protein_coding	-	15/39	XM_021064767.1:c.2253-368G>A	-	-	-	-	-	-	rs326430961	-	1	-	EntrezGene	HGNC:11480	-	-	-	-	XP_020920426.1	-	-	-	-	-	RefSeq	-	-	-	-	-	-			LOC106504436
WU_10.2_10_45953638	10:41386422-41386422	A	intron_variant	MODIFIER	SVIL	100518681	Transcript	XM_021064768.1	protein_coding	-	13/37	XM_021064768.1:c.2253-368G>A	-	-	-	-	-	-	rs326430961	-	1	-	EntrezGene	HGNC:11480	-	-	-	-	XP_020920427.1	-	-	-	-	-	RefSeq	-	-	-	-	-	-			ACAN
WU_10.2_10_45953638	10:41386422-41386422	A	intron_variant	MODIFIER	SVIL	100518681	Transcript	XM_021064769.1	protein_coding	-	11/35	XM_021064769.1:c.2247-368G>A	-	-	-	-	-	-	rs326430961	-	1	-	EntrezGene	HGNC:11480	-	-	-	-	XP_020920428.1	-	-	-	-	-	RefSeq	-	-	-	-	-	-			ARID3B
WU_10.2_10_45953638	10:41386422-41386422	A	intron_variant	MODIFIER	SVIL	100518681	Transcript	XM_021064770.1	protein_coding	-	13/37	XM_021064770.1:c.1986-368G>A	-	-	-	-	-	-	rs326430961	-	1	-	EntrezGene	HGNC:11480	-	-	-	-	XP_020920429.1	-	-	-	-	-	RefSeq	-	-	-	-	-	-			SEC23A
WU_10.2_10_45953638	10:41386422-41386422	A	intron_variant	MODIFIER	SVIL	100518681	Transcript	XM_021064771.1	protein_coding	-	12/38	XM_021064771.1:c.1632-368G>A	-	-	-	-	-	-	rs326430961	-	1	-	EntrezGene	HGNC:11480	-	-	-	-	XP_020920430.1	-	-	-	-	-	RefSeq	-	-	-	-	-	-			RYR3
WU_10.2_10_45953638	10:41386422-41386422	A	intron_variant	MODIFIER	SVIL	100518681	Transcript	XM_021064772.1	protein_coding	-	12/36	XM_021064772.1:c.1632-368G>A	-	-	-	-	-	-	rs326430961	-	1	-	EntrezGene	HGNC:11480	-	-	-	-	XP_020920431.1	-	-	-	-	-	RefSeq	-	-	-	-	-	-			ST8SIA2
WU_10.2_10_45953638	10:41386422-41386422	A	intron_variant	MODIFIER	SVIL	100518681	Transcript	XM_021064773.1	protein_coding	-	10/36	XM_021064773.1:c.1380-368G>A	-	-	-	-	-	-	rs326430961	-	1	-	EntrezGene	HGNC:11480	-	-	-	-	XP_020920432.1	-	-	-	-	-	RefSeq	-	-	-	-	-	-			SLC39A9
WU_10.2_10_45953638	10:41386422-41386422	A	intron_variant	MODIFIER	SVIL	100518681	Transcript	XM_021064774.1	protein_coding	-	12/37	XM_021064774.1:c.1371-368G>A	-	-	-	-	-	-	rs326430961	-	1	-	EntrezGene	HGNC:11480	-	-	-	-	XP_020920433.1	-	-	-	-	-	RefSeq	-	-	-	-	-	-			DPF3
WU_10.2_10_45953638	10:41386422-41386422	A	intron_variant	MODIFIER	SVIL	100518681	Transcript	XM_021064775.1	protein_coding	-	9/35	XM_021064775.1:c.1284-368G>A	-	-	-	-	-	-	rs326430961	-	1	-	EntrezGene	HGNC:11480	-	-	-	-	XP_020920434.1	-	-	-	-	-	RefSeq	-	-	-	-	-	-			ACOT4
WU_10.2_10_45953638	10:41386422-41386422	A	intron_variant	MODIFIER	SVIL	100518681	Transcript	XM_021064776.1	protein_coding	-	10/34	XM_021064776.1:c.1380-368G>A	-	-	-	-	-	-	rs326430961	-	1	-	EntrezGene	HGNC:11480	-	-	-	-	XP_020920435.1	-	-	-	-	-	RefSeq	-	-	-	-	-	-			LOC100158115
WU_10.2_10_45953638	10:41386422-41386422	A	intron_variant	MODIFIER	SVIL	100518681	Transcript	XM_021064777.1	protein_coding	-	10/36	XM_021064777.1:c.1119-368G>A	-	-	-	-	-	-	rs326430961	-	1	-	EntrezGene	HGNC:11480	-	-	-	-	XP_020920436.1	-	-	-	-	-	RefSeq	-	-	-	-	-	-			EIF2B2
WU_10.2_10_45953638	10:41386422-41386422	A	intron_variant	MODIFIER	SVIL	100518681	Transcript	XM_021064778.1	protein_coding	-	9/33	XM_021064778.1:c.1236-368G>A	-	-	-	-	-	-	rs326430961	-	1	-	EntrezGene	HGNC:11480	-	-	-	-	XP_020920437.1	-	-	-	-	-	RefSeq	-	-	-	-	-	-			NRXN3
WU_10.2_10_45953638	10:41386422-41386422	A	intron_variant	MODIFIER	SVIL	100518681	Transcript	XM_021064779.1	protein_coding	-	11/37	XM_021064779.1:c.1023-368G>A	-	-	-	-	-	-	rs326430961	-	1	-	EntrezGene	HGNC:11480	-	-	-	-	XP_020920438.1	-	-	-	-	-	RefSeq	-	-	-	-	-	-			PTPN21
WU_10.2_10_45953638	10:41386422-41386422	A	intron_variant	MODIFIER	SVIL	100518681	Transcript	XM_021064780.1	protein_coding	-	11/37	XM_021064780.1:c.1023-368G>A	-	-	-	-	-	-	rs326430961	-	1	-	EntrezGene	HGNC:11480	-	-	-	-	XP_020920439.1	-	-	-	-	-	RefSeq	-	-	-	-	-	-			RIN3
WU_10.2_10_45953638	10:41386422-41386422	A	intron_variant	MODIFIER	SVIL	100518681	Transcript	XM_021064781.1	protein_coding	-	11/36	XM_021064781.1:c.1023-368G>A	-	-	-	-	-	-	rs326430961	-	1	-	EntrezGene	HGNC:11480	-	-	-	-	XP_020920440.1	-	-	-	-	-	RefSeq	-	-	-	-	-	-			ITPK1
WU_10.2_10_45953638	10:41386422-41386422	A	intron_variant	MODIFIER	SVIL	100518681	Transcript	XM_021064782.1	protein_coding	-	11/36	XM_021064782.1:c.1023-368G>A	-	-	-	-	-	-	rs326430961	-	1	-	EntrezGene	HGNC:11480	-	-	-	-	XP_020920441.1	-	-	-	-	-	RefSeq	-	-	-	-	-	-			TBC1D14
WU_10.2_10_45953638	10:41386422-41386422	A	intron_variant	MODIFIER	SVIL	100518681	Transcript	XM_021064783.1	protein_coding	-	8/33	XM_021064783.1:c.1023-368G>A	-	-	-	-	-	-	rs326430961	-	1	-	EntrezGene	HGNC:11480	-	-	-	-	XP_020920442.1	-	-	-	-	-	RefSeq	-	-	-	-	-	-			RAB28
WU_10.2_10_45953638	10:41386422-41386422	A	intron_variant	MODIFIER	SVIL	100518681	Transcript	XM_021064784.1	protein_coding	-	11/35	XM_021064784.1:c.1023-368G>A	-	-	-	-	-	-	rs326430961	-	1	-	EntrezGene	HGNC:11480	-	-	-	-	XP_020920443.1	-	-	-	-	-	RefSeq	-	-	-	-	-	-			PROM1
WU_10.2_10_45953638	10:41386422-41386422	A	intron_variant	MODIFIER	SVIL	100518681	Transcript	XM_021064785.1	protein_coding	-	11/35	XM_021064785.1:c.1023-368G>A	-	-	-	-	-	-	rs326430961	-	1	-	EntrezGene	HGNC:11480	-	-	-	-	XP_020920444.1	-	-	-	-	-	RefSeq	-	-	-	-	-	-			SLIT2
WU_10.2_10_45953638	10:41386422-41386422	A	intron_variant	MODIFIER	SVIL	100518681	Transcript	XM_021064786.1	protein_coding	-	11/35	XM_021064786.1:c.1023-368G>A	-	-	-	-	-	-	rs326430961	-	1	-	EntrezGene	HGNC:11480	-	-	-	-	XP_020920445.1	-	-	-	-	-	RefSeq	-	-	-	-	-	-			PCDH7
WU_10.2_10_45953638	10:41386422-41386422	A	intron_variant	MODIFIER	SVIL	100518681	Transcript	XM_021064788.1	protein_coding	-	11/35	XM_021064788.1:c.1023-368G>A	-	-	-	-	-	-	rs326430961	-	1	-	EntrezGene	HGNC:11480	-	-	-	-	XP_020920447.1	-	-	-	-	-	RefSeq	-	-	-	-	-	-			DTHD1
WU_10.2_10_45953638	10:41386422-41386422	A	intron_variant	MODIFIER	SVIL	100518681	Transcript	XM_021064789.1	protein_coding	-	10/34	XM_021064789.1:c.1023-368G>A	-	-	-	-	-	-	rs326430961	-	1	-	EntrezGene	HGNC:11480	-	-	-	-	XP_020920448.1	-	-	-	-	-	RefSeq	-	-	-	-	-	-			FAM114A1
ASGA0047761	10:41508322-41508322	C	intergenic_variant	MODIFIER	-	-	-	-	-	-	-	-	-	-	-	-	-	-	rs81424114	-	-	-	-	-	-	-	-	-	-	-	-	-	-	-	-	-	-	-	-	-	-			APBB2
WU_10.2_10_46790123	10:42205970-42205970	A	intron_variant	MODIFIER	ZEB1	ENSSSCG00000011025	Transcript	ENSSSCT00000012067.4	protein_coding	-	5/9	ENSSSCT00000012067.4:c.590-3479C>A	-	-	-	-	-	-	rs323656297	-	1	-	HGNC	HGNC:11642	-	-	A2	-	ENSSSCP00000011759	-	F1RWD4	UPI00123602BA	-	-	Ensembl	-	-	-	-	-	-			FSTL5
WU_10.2_10_46790123	10:42205970-42205970	A	intron_variant	MODIFIER	ZEB1	ENSSSCG00000011025	Transcript	ENSSSCT00000035562.3	protein_coding	-	6/10	ENSSSCT00000035562.3:c.794-3479C>A	-	-	-	-	-	-	rs323656297	-	1	-	HGNC	HGNC:11642	-	-	P5	-	ENSSSCP00000029132	-	K7GMN7	UPI00123539D0	-	-	Ensembl	-	-	-	-	-	-			CRACD
WU_10.2_10_46790123	10:42205970-42205970	A	intron_variant	MODIFIER	ZEB1	ENSSSCG00000011025	Transcript	ENSSSCT00000044948.2	protein_coding	-	5/9	ENSSSCT00000044948.2:c.731-3479C>A	-	-	-	-	-	-	rs323656297	-	1	-	HGNC	HGNC:11642	-	-	A2	-	ENSSSCP00000057524	-	A0A287BLZ4	UPI0012369070	-	-	Ensembl	-	-	-	-	-	-			KIAA1211
WU_10.2_10_46790123	10:42205970-42205970	A	intron_variant	MODIFIER	ZEB1	ENSSSCG00000011025	Transcript	ENSSSCT00000066616.1	protein_coding	-	6/10	ENSSSCT00000066616.1:c.743-3479C>A	-	-	-	-	-	-	rs323656297	-	1	-	HGNC	HGNC:11642	-	-	A2	-	ENSSSCP00000063968	-	A0A5G2QPF9	UPI001235B2A8	-	-	Ensembl	-	-	-	-	-	-			IGFBP7
WU_10.2_10_46790123	10:42205970-42205970	A	intron_variant	MODIFIER	ZEB1	100520325	Transcript	XM_021064196.1	protein_coding	-	6/8	XM_021064196.1:c.794-3479C>A	-	-	-	-	-	-	rs323656297	-	1	-	EntrezGene	HGNC:11642	-	-	-	-	XP_020919855.1	-	-	-	-	-	RefSeq	-	-	-	-	-	-			NUP54
MARC0054233	10:43793444-43793444	A	intergenic_variant	MODIFIER	-	-	-	-	-	-	-	-	-	-	-	-	-	-	rs81244120	-	-	-	-	-	-	-	-	-	-	-	-	-	-	-	-	-	-	-	-	-	-			FRAS1
ASGA0047892	10:43805496-43805496	G	intergenic_variant	MODIFIER	-	-	-	-	-	-	-	-	-	-	-	-	-	-	rs81424475	-	-	-	-	-	-	-	-	-	-	-	-	-	-	-	-	-	-	-	-	-	-			LOC102167454
ASGA0047927	10:44192068-44192068	A	intron_variant	MODIFIER	MRC1	ENSSSCG00000011038	Transcript	ENSSSCT00000012082.4	protein_coding	-	17/28	ENSSSCT00000012082.4:c.2577-102G>A	-	-	-	-	-	-	rs81424556	-	1	-	EntrezGene	-	-	-	A2	-	ENSSSCP00000011774	-	F1RWA3	UPI000BAD75D4	-	-	Ensembl	-	-	-	-	-	-			MND1
ASGA0047927	10:44192068-44192068	A	intron_variant	MODIFIER	MRC1	ENSSSCG00000011038	Transcript	ENSSSCT00000035897.3	protein_coding	-	18/30	ENSSSCT00000035897.3:c.2619-102G>A	-	-	-	-	-	-	rs81424556	-	1	-	EntrezGene	-	-	-	P5	-	ENSSSCP00000029727	-	K7GPB4	UPI00123531F6	-	-	Ensembl	-	-	-	-	-	-			SLC10A7
ASGA0047927	10:44192068-44192068	A	intron_variant	MODIFIER	MRC1	ENSSSCG00000011038	Transcript	ENSSSCT00000038702.2	protein_coding	-	18/29	ENSSSCT00000038702.2:c.2619-102G>A	-	-	-	-	-	-	rs81424556	-	1	-	EntrezGene	-	-	-	A2	-	ENSSSCP00000051028	-	G9K122	UPI00023EF1FB	-	-	Ensembl	-	-	-	-	-	-			INPP4B
ASGA0047927	10:44192068-44192068	A	intron_variant	MODIFIER	MRC1	ENSSSCG00000011038	Transcript	ENSSSCT00000066913.1	protein_coding	-	21/32	ENSSSCT00000066913.1:c.2421-102G>A	-	-	-	-	-	-	rs81424556	-	1	-	EntrezGene	-	-	-	A2	-	ENSSSCP00000063054	-	A0A5G2QEG1	UPI00123684D0	-	-	Ensembl	-	-	-	-	-	-			CAMK2D
ASGA0047927	10:44192068-44192068	A	intron_variant	MODIFIER	MRC1	ENSSSCG00000011038	Transcript	ENSSSCT00000067723.1	protein_coding	-	18/30	ENSSSCT00000067723.1:c.2616-102G>A	-	-	-	-	-	-	rs81424556	-	1	-	EntrezGene	-	-	-	-	-	ENSSSCP00000064738	-	A0A5G2QJS2	UPI0012361DF6	-	-	Ensembl	-	-	-	-	-	-			BANK1
ASGA0047927	10:44192068-44192068	A	intron_variant	MODIFIER	MRC1	ENSSSCG00000011038	Transcript	ENSSSCT00000069732.1	protein_coding	-	18/28	ENSSSCT00000069732.1:c.2616-102G>A	-	-	-	-	-	-	rs81424556	-	1	-	EntrezGene	-	-	-	-	-	ENSSSCP00000070650	-	A0A5G2R0H2	UPI00123659E3	-	-	Ensembl	-	-	-	-	-	-			BMPR1B
ASGA0047927	10:44192068-44192068	A	intron_variant,non_coding_transcript_variant	MODIFIER	-	NM_001255969.1	Transcript	NM_001255969.1	cDNA	-	18/29	NM_001255969.1:n.2712-102G>A	-	-	-	-	-	-	rs81424556	-	1	-	-	-	-	-	-	-	-	-	-	-	-	-	RefSeq	-	-	-	-	-	-			PDLIM5
ALGA0059049	10:47339095-47339095	A	intergenic_variant	MODIFIER	-	-	-	-	-	-	-	-	-	-	-	-	-	-	rs81425058	-	-	-	-	-	-	-	-	-	-	-	-	-	-	-	-	-	-	-	-	-	-			SNCA
WU_10.2_10_52897186	10:48053648-48053648	A	downstream_gene_variant	MODIFIER	FRMD4A	ENSSSCG00000011056	Transcript	ENSSSCT00000012100.4	protein_coding	-	-	-	-	-	-	-	-	-	rs320919700	3930	1	-	HGNC	HGNC:25491	-	-	A2	-	ENSSSCP00000011792	-	F1RTX2	UPI000A2B90CD	-	-	Ensembl	-	-	-	-	-	-			FAM13A
WU_10.2_10_52897186	10:48053648-48053648	A	downstream_gene_variant	MODIFIER	FRMD4A	ENSSSCG00000011056	Transcript	ENSSSCT00000051237.2	protein_coding	-	-	-	-	-	-	-	-	-	rs320919700	4015	1	-	HGNC	HGNC:25491	-	-	P5	-	ENSSSCP00000058930	-	A0A287BR56	UPI000A2B7B7D	-	-	Ensembl	-	-	-	-	-	-			ARHGAP24
WU_10.2_10_52897186	10:48053648-48053648	A	downstream_gene_variant	MODIFIER	FRMD4A	ENSSSCG00000011056	Transcript	ENSSSCT00000080162.1	protein_coding	-	-	-	-	-	-	-	-	-	rs320919700	3930	1	-	HGNC	HGNC:25491	-	-	A2	-	ENSSSCP00000070242	-	A0A480DYF3	UPI000A2B4F81	-	-	Ensembl	-	-	-	-	-	-			RASGEF1B
WU_10.2_10_52897186	10:48053648-48053648	A	downstream_gene_variant	MODIFIER	FRMD4A	ENSSSCG00000011056	Transcript	ENSSSCT00000085983.1	protein_coding	-	-	-	-	-	-	-	-	-	rs320919700	3930	1	-	HGNC	HGNC:25491	-	-	-	-	ENSSSCP00000069788	-	A0A5G2QY28	UPI001236C0E1	-	-	Ensembl	-	-	-	-	-	-			STK33
WU_10.2_10_52897186	10:48053648-48053648	A	downstream_gene_variant	MODIFIER	FRMD4A	ENSSSCG00000011056	Transcript	ENSSSCT00000088672.1	protein_coding	-	-	-	-	-	-	-	-	-	rs320919700	3930	1	-	HGNC	HGNC:25491	-	-	A2	-	ENSSSCP00000061760	-	A0A5G2QUD4	UPI000A2AF6DE	-	-	Ensembl	-	-	-	-	-	-			LOC100736607
WU_10.2_10_52897186	10:48053648-48053648	A	downstream_gene_variant	MODIFIER	FRMD4A	100737056	Transcript	XM_021064213.1	protein_coding	-	-	-	-	-	-	-	-	-	rs320919700	4700	1	-	EntrezGene	HGNC:25491	-	-	-	-	XP_020919872.1	-	-	-	-	-	RefSeq	-	-	-	-	-	-			OVCH2
WU_10.2_10_52897186	10:48053648-48053648	A	downstream_gene_variant	MODIFIER	FRMD4A	100737056	Transcript	XM_021064217.1	protein_coding	-	-	-	-	-	-	-	-	-	rs320919700	4700	1	-	EntrezGene	HGNC:25491	-	-	-	-	XP_020919876.1	-	-	-	-	-	RefSeq	-	-	-	-	-	-			OR52W1
WU_10.2_10_52897186	10:48053648-48053648	A	downstream_gene_variant	MODIFIER	FRMD4A	100737056	Transcript	XM_021064218.1	protein_coding	-	-	-	-	-	-	-	-	-	rs320919700	4700	1	-	EntrezGene	HGNC:25491	-	-	-	-	XP_020919877.1	-	-	-	-	-	RefSeq	-	-	-	-	-	-			LOC110255363
WU_10.2_10_52897186	10:48053648-48053648	A	downstream_gene_variant	MODIFIER	FRMD4A	100737056	Transcript	XM_021064221.1	protein_coding	-	-	-	-	-	-	-	-	-	rs320919700	4700	1	-	EntrezGene	HGNC:25491	-	-	-	-	XP_020919880.1	-	-	-	-	-	RefSeq	-	-	-	-	-	-			LOC100518085
WU_10.2_10_52897186	10:48053648-48053648	A	downstream_gene_variant	MODIFIER	FRMD4A	100737056	Transcript	XM_021064222.1	protein_coding	-	-	-	-	-	-	-	-	-	rs320919700	4700	1	-	EntrezGene	HGNC:25491	-	-	-	-	XP_020919881.1	-	-	-	-	-	RefSeq	-	-	-	-	-	-			MRPL48
WU_10.2_10_52897186	10:48053648-48053648	A	downstream_gene_variant	MODIFIER	FRMD4A	100737056	Transcript	XM_021064223.1	protein_coding	-	-	-	-	-	-	-	-	-	rs320919700	4700	1	-	EntrezGene	HGNC:25491	-	-	-	-	XP_020919882.1	-	-	-	-	-	RefSeq	-	-	-	-	-	-			DNAJB13
WU_10.2_10_52897186	10:48053648-48053648	A	downstream_gene_variant	MODIFIER	FRMD4A	100737056	Transcript	XM_021064225.1	protein_coding	-	-	-	-	-	-	-	-	-	rs320919700	4700	1	-	EntrezGene	HGNC:25491	-	-	-	-	XP_020919884.1	-	-	-	-	-	RefSeq	-	-	-	-	-	-			UCP2
WU_10.2_10_52897186	10:48053648-48053648	A	downstream_gene_variant	MODIFIER	FRMD4A	100737056	Transcript	XM_021064226.1	protein_coding	-	-	-	-	-	-	-	-	-	rs320919700	4700	1	-	EntrezGene	HGNC:25491	-	-	-	-	XP_020919885.1	-	-	-	-	-	RefSeq	-	-	-	-	-	-			PAAF1
ALGA0059163	10:49096617-49096617	A	intron_variant	MODIFIER	PDSS1	ENSSSCG00000011061	Transcript	ENSSSCT00000053999.2	protein_coding	-	7/11	ENSSSCT00000053999.2:c.704-16C>T	-	-	-	-	-	-	rs81425316	-	-1	-	HGNC	HGNC:17759	-	-	P1	-	ENSSSCP00000051289	-	A0A287B4S1	UPI0012365359	-	-	Ensembl	-	-	-	-	-	-			OR2AT4
ALGA0059163	10:49096617-49096617	A	intron_variant	MODIFIER	PDSS1	100514361	Transcript	XM_005668142.3	protein_coding	-	6/10	XM_005668142.3:c.706-16C>T	-	-	-	-	-	-	rs81425316	-	-1	-	EntrezGene	HGNC:17759	-	-	-	-	XP_005668199.2	-	-	-	-	-	RefSeq	-	-	-	-	-	-			LOC100627340
ASGA0048247	10:50572291-50572291	A	intron_variant	MODIFIER	ARHGAP21	ENSSSCG00000011074	Transcript	ENSSSCT00000028075.3	protein_coding	-	2/24	ENSSSCT00000028075.3:c.-230-19804G>A	-	-	-	-	-	-	rs81425439	-	1	-	HGNC	HGNC:23725	-	-	A2	-	ENSSSCP00000022198	-	I3LDR4	UPI000BAD620B	-	-	Ensembl	-	-	-	-	-	-			UVRAG
ASGA0048247	10:50572291-50572291	A	intron_variant	MODIFIER	ARHGAP21	ENSSSCG00000011074	Transcript	ENSSSCT00000029464.2	protein_coding	-	2/25	ENSSSCT00000029464.2:c.-230-19804G>A	-	-	-	-	-	-	rs81425439	-	1	-	HGNC	HGNC:23725	-	-	P5	-	ENSSSCP00000027534	-	I3LTT6	UPI000BAD6CE7	-	-	Ensembl	-	-	-	-	-	-			MYO7A
ASGA0048247	10:50572291-50572291	A	intron_variant	MODIFIER	ARHGAP21	100518571	Transcript	XM_021064916.1	protein_coding	-	1/24	XM_021064916.1:c.79-19804G>A	-	-	-	-	-	-	rs81425439	-	1	-	EntrezGene	HGNC:23725	-	-	-	-	XP_020920575.1	-	-	-	-	-	RefSeq	-	-	-	-	-	-			GAB2
WU_10.2_10_56066975	10:50614314-50614314	T	intron_variant	MODIFIER	ARHGAP21	ENSSSCG00000011074	Transcript	ENSSSCT00000028075.3	protein_coding	-	4/24	ENSSSCT00000028075.3:c.-26-10494C>T	-	-	-	-	-	-	rs341019037	-	1	-	HGNC	HGNC:23725	-	-	A2	-	ENSSSCP00000022198	-	I3LDR4	UPI000BAD620B	-	-	Ensembl	-	-	-	-	-	-			RAB38
WU_10.2_10_56066975	10:50614314-50614314	T	intron_variant	MODIFIER	ARHGAP21	ENSSSCG00000011074	Transcript	ENSSSCT00000029464.2	protein_coding	-	4/25	ENSSSCT00000029464.2:c.-26-10494C>T	-	-	-	-	-	-	rs341019037	-	1	-	HGNC	HGNC:23725	-	-	P5	-	ENSSSCP00000027534	-	I3LTT6	UPI000BAD6CE7	-	-	Ensembl	-	-	-	-	-	-			CTSC
WU_10.2_10_56066975	10:50614314-50614314	T	intron_variant	MODIFIER	ARHGAP21	100518571	Transcript	XM_021064916.1	protein_coding	-	3/24	XM_021064916.1:c.283-10494C>T	-	-	-	-	-	-	rs341019037	-	1	-	EntrezGene	HGNC:23725	-	-	-	-	XP_020920575.1	-	-	-	-	-	RefSeq	-	-	-	-	-	-			GRM5
ASGA0048254	10:50642051-50642051	A	intron_variant	MODIFIER	ARHGAP21	ENSSSCG00000011074	Transcript	ENSSSCT00000028075.3	protein_coding	-	8/24	ENSSSCT00000028075.3:c.2095+1553C>A	-	-	-	-	-	-	rs81425452	-	1	-	HGNC	HGNC:23725	-	-	A2	-	ENSSSCP00000022198	-	I3LDR4	UPI000BAD620B	-	-	Ensembl	-	-	-	-	-	-			CEP295
ASGA0048254	10:50642051-50642051	A	intron_variant	MODIFIER	ARHGAP21	ENSSSCG00000011074	Transcript	ENSSSCT00000029464.2	protein_coding	-	9/25	ENSSSCT00000029464.2:c.2125+1553C>A	-	-	-	-	-	-	rs81425452	-	1	-	HGNC	HGNC:23725	-	-	P5	-	ENSSSCP00000027534	-	I3LTT6	UPI000BAD6CE7	-	-	Ensembl	-	-	-	-	-	-			PIWIL4
ASGA0048254	10:50642051-50642051	A	intron_variant	MODIFIER	ARHGAP21	100518571	Transcript	XM_021064916.1	protein_coding	-	8/24	XM_021064916.1:c.2433+1553C>A	-	-	-	-	-	-	rs81425452	-	1	-	EntrezGene	HGNC:23725	-	-	-	-	XP_020920575.1	-	-	-	-	-	RefSeq	-	-	-	-	-	-			TMEM123
ALGA0059229	10:50683873-50683873	A	downstream_gene_variant	MODIFIER	ARHGAP21	ENSSSCG00000011074	Transcript	ENSSSCT00000028075.3	protein_coding	-	-	-	-	-	-	-	-	-	rs80927428	3719	1	-	HGNC	HGNC:23725	-	-	A2	-	ENSSSCP00000022198	-	I3LDR4	UPI000BAD620B	-	-	Ensembl	-	-	-	-	-	-			RDX
ALGA0059229	10:50683873-50683873	A	downstream_gene_variant	MODIFIER	ARHGAP21	ENSSSCG00000011074	Transcript	ENSSSCT00000029464.2	protein_coding	-	-	-	-	-	-	-	-	-	rs80927428	3722	1	-	HGNC	HGNC:23725	-	-	P5	-	ENSSSCP00000027534	-	I3LTT6	UPI000BAD6CE7	-	-	Ensembl	-	-	-	-	-	-			NCAM1
ALGA0059229	10:50683873-50683873	A	downstream_gene_variant	MODIFIER	ARHGAP21	100518571	Transcript	XM_021064916.1	protein_coding	-	-	-	-	-	-	-	-	-	rs80927428	3717	1	-	EntrezGene	HGNC:23725	-	-	-	-	XP_020920575.1	-	-	-	-	-	RefSeq	-	-	-	-	-	-			GRIK4
WU_10.2_10_56665358	10:51194150-51194150	C	intron_variant	MODIFIER	KIAA1217	ENSSSCG00000011075	Transcript	ENSSSCT00000061368.2	protein_coding	-	1/19	ENSSSCT00000061368.2:c.-1613+11315A>G	-	-	-	-	-	-	rs341353800	-	-1	-	HGNC	HGNC:25428	-	-	A2	-	ENSSSCP00000047851	-	A0A287AUR1	UPI000BADA845	-	-	Ensembl	-	-	-	-	-	-			UBASH3B
ASGA0048294	10:52311304-52311304	A	intron_variant	MODIFIER	PIP4K2A	ENSSSCG00000011079	Transcript	ENSSSCT00000012125.4	protein_coding	-	2/10	ENSSSCT00000012125.4:c.-33-27082G>A	-	-	-	-	-	-	rs81425561	-	1	-	HGNC	HGNC:8997	-	-	P1	-	ENSSSCP00000011817	-	F1RVI6	UPI001234E2F1	-	-	Ensembl	-	-	-	-	-	-			VWA5A
ASGA0048294	10:52311304-52311304	A	intron_variant	MODIFIER	PIP4K2A	ENSSSCG00000011079	Transcript	ENSSSCT00000012126.4	protein_coding	-	2/9	ENSSSCT00000012126.4:c.145-27082G>A	-	-	-	-	-	-	rs81425561	-	1	-	HGNC	HGNC:8997	-	-	-	-	ENSSSCP00000011818	-	F1RVI4	UPI001234AE54	-	-	Ensembl	-	-	-	-	-	-			KIRREL3
ASGA0048294	10:52311304-52311304	A	intron_variant	MODIFIER	PIP4K2A	100520446	Transcript	XM_013980256.2	protein_coding	-	1/9	XM_013980256.2:c.6+18918G>A	-	-	-	-	-	-	rs81425561	-	1	-	EntrezGene	HGNC:8997	-	-	-	-	XP_013835710.1	-	-	-	-	-	RefSeq	-	-	-	-	-	-			GUCY1A2
ASGA0048294	10:52311304-52311304	A	intron_variant	MODIFIER	PIP4K2A	100520446	Transcript	XM_013980257.2	protein_coding	-	1/8	XM_013980257.2:c.145-27082G>A	-	-	-	-	-	-	rs81425561	-	1	-	EntrezGene	HGNC:8997	-	-	-	-	XP_013835711.1	-	-	-	-	-	RefSeq	-	-	-	-	-	-			MDM4
ASGA0048294	10:52311304-52311304	A	intron_variant,non_coding_transcript_variant	MODIFIER	PIP4K2A	100520446	Transcript	XR_002336109.1	misc_RNA	-	1/8	XR_002336109.1:n.441-27082G>A	-	-	-	-	-	-	rs81425561	-	1	-	EntrezGene	HGNC:8997	-	-	-	-	-	-	-	-	-	-	RefSeq	-	-	-	-	-	-			PM20D1
ASGA0048294	10:52311304-52311304	A	intron_variant,non_coding_transcript_variant	MODIFIER	PIP4K2A	100520446	Transcript	XR_002336110.1	misc_RNA	-	1/7	XR_002336110.1:n.441-27082G>A	-	-	-	-	-	-	rs81425561	-	1	-	EntrezGene	HGNC:8997	-	-	-	-	-	-	-	-	-	-	RefSeq	-	-	-	-	-	-			CDK6
ASGA0048299	10:52385115-52385115	C	intron_variant	MODIFIER	PIP4K2A	ENSSSCG00000011079	Transcript	ENSSSCT00000012125.4	protein_coding	-	7/10	ENSSSCT00000012125.4:c.502-9816T>C	-	-	-	-	-	-	rs81425572	-	1	-	HGNC	HGNC:8997	-	-	P1	-	ENSSSCP00000011817	-	F1RVI6	UPI001234E2F1	-	-	Ensembl	-	-	-	-	-	-			ASB4
ASGA0048299	10:52385115-52385115	C	intron_variant	MODIFIER	PIP4K2A	ENSSSCG00000011079	Transcript	ENSSSCT00000012126.4	protein_coding	-	7/9	ENSSSCT00000012126.4:c.679-9816T>C	-	-	-	-	-	-	rs81425572	-	1	-	HGNC	HGNC:8997	-	-	-	-	ENSSSCP00000011818	-	F1RVI4	UPI001234AE54	-	-	Ensembl	-	-	-	-	-	-			THSD7A
ASGA0048299	10:52385115-52385115	C	intron_variant,non_coding_transcript_variant	MODIFIER	-	NM_001195781.1	Transcript	NM_001195781.1	cDNA	-	5/8	NM_001195781.1:n.539-9816T>C	-	-	-	-	-	-	rs81425572	-	1	-	-	-	-	-	-	-	-	-	-	-	-	-	RefSeq	-	-	-	-	-	-			AGMO
ASGA0048299	10:52385115-52385115	C	intron_variant	MODIFIER	PIP4K2A	100520446	Transcript	XM_013980256.2	protein_coding	-	6/9	XM_013980256.2:c.541-9816T>C	-	-	-	-	-	-	rs81425572	-	1	-	EntrezGene	HGNC:8997	-	-	-	-	XP_013835710.1	-	-	-	-	-	RefSeq	-	-	-	-	-	-			SNX13
ASGA0048299	10:52385115-52385115	C	intron_variant	MODIFIER	PIP4K2A	100520446	Transcript	XM_013980257.2	protein_coding	-	5/8	XM_013980257.2:c.526-9816T>C	-	-	-	-	-	-	rs81425572	-	1	-	EntrezGene	HGNC:8997	-	-	-	-	XP_013835711.1	-	-	-	-	-	RefSeq	-	-	-	-	-	-			DNAH11
ASGA0048299	10:52385115-52385115	C	intron_variant,non_coding_transcript_variant	MODIFIER	PIP4K2A	100520446	Transcript	XR_002336109.1	misc_RNA	-	6/8	XR_002336109.1:n.975-9816T>C	-	-	-	-	-	-	rs81425572	-	1	-	EntrezGene	HGNC:8997	-	-	-	-	-	-	-	-	-	-	RefSeq	-	-	-	-	-	-			SEMA3C
ASGA0048299	10:52385115-52385115	C	intron_variant,non_coding_transcript_variant	MODIFIER	PIP4K2A	100520446	Transcript	XR_002336110.1	misc_RNA	-	5/7	XR_002336110.1:n.822-9816T>C	-	-	-	-	-	-	rs81425572	-	1	-	EntrezGene	HGNC:8997	-	-	-	-	-	-	-	-	-	-	RefSeq	-	-	-	-	-	-			RABGAP1L
ASGA0048299	10:52385115-52385115	C	intron_variant,non_coding_transcript_variant	MODIFIER	PIP4K2A	100520446	Transcript	XR_002336111.1	misc_RNA	-	4/6	XR_002336111.1:n.2320-9816T>C	-	-	-	-	-	-	rs81425572	-	1	-	EntrezGene	HGNC:8997	-	-	-	-	-	-	-	-	-	-	RefSeq	-	-	-	-	-	-			CACNA1E
WU_10.2_10_58287937	10:52633431-52633431	C	intergenic_variant	MODIFIER	-	-	-	-	-	-	-	-	-	-	-	-	-	-	rs321254173	-	-	-	-	-	-	-	-	-	-	-	-	-	-	-	-	-	-	-	-	-	-			SHCBP1L
H3GA0056397	10:53549096-53549096	C	intergenic_variant	MODIFIER	-	-	-	-	-	-	-	-	-	-	-	-	-	-	rs81323669	-	-	-	-	-	-	-	-	-	-	-	-	-	-	-	-	-	-	-	-	-	-			SWT1
ASGA0094869	10:53697286-53697286	C	intron_variant	MODIFIER	NEBL	ENSSSCG00000011090	Transcript	ENSSSCT00000040834.2	protein_coding	-	1/28	ENSSSCT00000040834.2:c.-2504-33138T>C	-	-	-	-	-	-	rs81314157	-	1	-	HGNC	HGNC:16932	-	-	-	-	ENSSSCP00000055421	-	A0A287BFR4	UPI0012341743	-	-	Ensembl	-	-	-	-	-	-			PLA2G4A
ASGA0094869	10:53697286-53697286	C	intron_variant	MODIFIER	NEBL	ENSSSCG00000011090	Transcript	ENSSSCT00000079252.1	protein_coding	-	1/30	ENSSSCT00000079252.1:c.-2504-33138T>C	-	-	-	-	-	-	rs81314157	-	1	-	HGNC	HGNC:16932	-	-	-	-	ENSSSCP00000063555	-	A0A5G2QZ92	UPI000A2B81D1	-	-	Ensembl	-	-	-	-	-	-			LOC106507881
ASGA0094869	10:53697286-53697286	C	intron_variant	MODIFIER	NEBL	100522395	Transcript	XM_003357763.4	protein_coding	-	2/6	XM_003357763.4:c.165-33138T>C	-	-	-	-	-	-	rs81314157	-	1	-	EntrezGene	HGNC:16932	-	-	-	-	XP_003357811.1	-	-	-	-	-	RefSeq	-	-	-	-	-	-			PACC1
ALGA0108163	10:53943683-53943683	C	intron_variant	MODIFIER	NEBL	ENSSSCG00000011090	Transcript	ENSSSCT00000012137.4	protein_coding	-	23/25	ENSSSCT00000012137.4:c.2516-6630T>C	-	-	-	-	-	-	rs81336033	-	1	-	HGNC	HGNC:16932	-	-	-	-	ENSSSCP00000011828	-	F1RVG6	UPI0012355797	-	-	Ensembl	-	-	-	-	-	-			ATF3
ALGA0108163	10:53943683-53943683	C	intron_variant	MODIFIER	NEBL	ENSSSCG00000011090	Transcript	ENSSSCT00000040834.2	protein_coding	-	27/28	ENSSSCT00000040834.2:c.2477-6630T>C	-	-	-	-	-	-	rs81336033	-	1	-	HGNC	HGNC:16932	-	-	-	-	ENSSSCP00000055421	-	A0A287BFR4	UPI0012341743	-	-	Ensembl	-	-	-	-	-	-			TRAF5
ALGA0108163	10:53943683-53943683	C	intron_variant	MODIFIER	NEBL	ENSSSCG00000011090	Transcript	ENSSSCT00000045325.2	protein_coding	-	4/5	ENSSSCT00000045325.2:c.566-6630T>C	-	-	-	-	-	-	rs81336033	-	1	-	HGNC	HGNC:16932	-	-	-	-	ENSSSCP00000033103	-	A0A286ZNE6	UPI0012356AC1	-	-	Ensembl	-	-	-	-	-	-			SYT14
ALGA0108163	10:53943683-53943683	C	intron_variant	MODIFIER	NEBL	ENSSSCG00000011090	Transcript	ENSSSCT00000059223.2	protein_coding	-	24/26	ENSSSCT00000059223.2:c.2483-6630T>C	-	-	-	-	-	-	rs81336033	-	1	-	HGNC	HGNC:16932	-	-	-	-	ENSSSCP00000052708	-	A0A287B9E8	UPI001235EC95	-	-	Ensembl	-	-	-	-	-	-
ALGA0108163	10:53943683-53943683	C	intron_variant	MODIFIER	NEBL	ENSSSCG00000011090	Transcript	ENSSSCT00000062235.2	protein_coding	-	26/27	ENSSSCT00000062235.2:c.2759-6630T>C	-	-	-	-	-	-	rs81336033	-	1	-	HGNC	HGNC:16932	-	-	P1	-	ENSSSCP00000043408	-	A0A287AHR6	UPI0001E87F86	-	-	Ensembl	-	-	-	-	-	-
ALGA0108163	10:53943683-53943683	C	intron_variant	MODIFIER	NEBL	ENSSSCG00000011090	Transcript	ENSSSCT00000079252.1	protein_coding	-	29/30	ENSSSCT00000079252.1:c.2720-6630T>C	-	-	-	-	-	-	rs81336033	-	1	-	HGNC	HGNC:16932	-	-	-	-	ENSSSCP00000063555	-	A0A5G2QZ92	UPI000A2B81D1	-	-	Ensembl	-	-	-	-	-	-
ALGA0108163	10:53943683-53943683	C	intron_variant	MODIFIER	NEBL	100522395	Transcript	XM_003130787.4	protein_coding	-	26/27	XM_003130787.4:c.2759-6630T>C	-	-	-	-	-	-	rs81336033	-	1	-	EntrezGene	HGNC:16932	-	-	-	-	XP_003130835.1	-	-	-	-	-	RefSeq	-	-	-	-	-	-
ALGA0108163	10:53943683-53943683	C	intron_variant	MODIFIER	NEBL	100522395	Transcript	XM_003357763.4	protein_coding	-	5/6	XM_003357763.4:c.530-6630T>C	-	-	-	-	-	-	rs81336033	-	1	-	EntrezGene	HGNC:16932	-	-	-	-	XP_003357811.1	-	-	-	-	-	RefSeq	-	-	-	-	-	-
ALGA0108163	10:53943683-53943683	C	intron_variant	MODIFIER	NEBL	100522395	Transcript	XM_013980273.2	protein_coding	-	24/25	XM_013980273.2:c.2516-6630T>C	-	-	-	-	-	-	rs81336033	-	1	-	EntrezGene	HGNC:16932	-	-	-	-	XP_013835727.1	-	-	-	-	-	RefSeq	-	-	-	-	-	-
ALGA0108163	10:53943683-53943683	C	intron_variant	MODIFIER	NEBL	100522395	Transcript	XM_013980276.2	protein_coding	-	23/24	XM_013980276.2:c.2414-6630T>C	-	-	-	-	-	-	rs81336033	-	1	-	EntrezGene	HGNC:16932	-	-	-	-	XP_013835730.1	-	-	-	-	-	RefSeq	-	-	-	-	-	-
ALGA0108163	10:53943683-53943683	C	intron_variant	MODIFIER	NEBL	100522395	Transcript	XM_021064950.1	protein_coding	-	26/27	XM_021064950.1:c.2750-6630T>C	-	-	-	-	-	-	rs81336033	-	1	-	EntrezGene	HGNC:16932	-	-	-	-	XP_020920609.1	-	-	-	-	-	RefSeq	-	-	-	-	-	-
ALGA0108163	10:53943683-53943683	C	intron_variant	MODIFIER	NEBL	100522395	Transcript	XM_021064951.1	protein_coding	-	28/29	XM_021064951.1:c.2720-6630T>C	-	-	-	-	-	-	rs81336033	-	1	-	EntrezGene	HGNC:16932	-	-	-	-	XP_020920610.1	-	-	-	-	-	RefSeq	-	-	-	-	-	-
ALGA0108163	10:53943683-53943683	C	intron_variant	MODIFIER	NEBL	100522395	Transcript	XM_021064952.1	protein_coding	-	26/27	XM_021064952.1:c.2720-6630T>C	-	-	-	-	-	-	rs81336033	-	1	-	EntrezGene	HGNC:16932	-	-	-	-	XP_020920611.1	-	-	-	-	-	RefSeq	-	-	-	-	-	-
ALGA0108163	10:53943683-53943683	C	intron_variant	MODIFIER	NEBL	100522395	Transcript	XM_021064953.1	protein_coding	-	27/28	XM_021064953.1:c.2720-6630T>C	-	-	-	-	-	-	rs81336033	-	1	-	EntrezGene	HGNC:16932	-	-	-	-	XP_020920612.1	-	-	-	-	-	RefSeq	-	-	-	-	-	-
ALGA0108163	10:53943683-53943683	C	intron_variant	MODIFIER	NEBL	100522395	Transcript	XM_021064954.1	protein_coding	-	25/26	XM_021064954.1:c.2687-6630T>C	-	-	-	-	-	-	rs81336033	-	1	-	EntrezGene	HGNC:16932	-	-	-	-	XP_020920613.1	-	-	-	-	-	RefSeq	-	-	-	-	-	-
ALGA0108163	10:53943683-53943683	C	intron_variant	MODIFIER	NEBL	100522395	Transcript	XM_021064955.1	protein_coding	-	25/26	XM_021064955.1:c.2657-6630T>C	-	-	-	-	-	-	rs81336033	-	1	-	EntrezGene	HGNC:16932	-	-	-	-	XP_020920614.1	-	-	-	-	-	RefSeq	-	-	-	-	-	-
ALGA0108163	10:53943683-53943683	C	intron_variant	MODIFIER	NEBL	100522395	Transcript	XM_021064956.1	protein_coding	-	26/27	XM_021064956.1:c.2618-6630T>C	-	-	-	-	-	-	rs81336033	-	1	-	EntrezGene	HGNC:16932	-	-	-	-	XP_020920615.1	-	-	-	-	-	RefSeq	-	-	-	-	-	-
ALGA0108163	10:53943683-53943683	C	intron_variant	MODIFIER	NEBL	100522395	Transcript	XM_021064957.1	protein_coding	-	28/29	XM_021064957.1:c.2618-6630T>C	-	-	-	-	-	-	rs81336033	-	1	-	EntrezGene	HGNC:16932	-	-	-	-	XP_020920616.1	-	-	-	-	-	RefSeq	-	-	-	-	-	-
ASGA0096975	10:54179561-54179561	C	intergenic_variant	MODIFIER	-	-	-	-	-	-	-	-	-	-	-	-	-	-	rs81316817	-	-	-	-	-	-	-	-	-	-	-	-	-	-	-	-	-	-	-	-	-	-
WU_10.2_10_60646505	10:54761683-54761683	T	intergenic_variant	MODIFIER	-	-	-	-	-	-	-	-	-	-	-	-	-	-	rs330091594	-	-	-	-	-	-	-	-	-	-	-	-	-	-	-	-	-	-	-	-	-	-
H3GA0030503	10:58433620-58433620	G	intron_variant,non_coding_transcript_variant	MODIFIER	-	ENSSSCG00000041097	Transcript	ENSSSCT00000069174.1	lncRNA	-	6/6	ENSSSCT00000069174.1:n.930-36365A>C	-	-	-	-	-	-	rs81426402	-	-1	-	-	-	-	-	-	-	-	-	-	-	-	-	Ensembl	-	-	-	-	-	-
WU_10.2_10_64348824	10:58587289-58587289	T	intron_variant,non_coding_transcript_variant	MODIFIER	-	ENSSSCG00000041097	Transcript	ENSSSCT00000069174.1	lncRNA	-	3/6	ENSSSCT00000069174.1:n.343-23862G>A	-	-	-	-	-	-	rs339972741	-	-1	-	-	-	-	-	-	-	-	-	-	-	-	-	Ensembl	-	-	-	-	-	-
ALGA0059679	10:59366987-59366987	T	intron_variant	MODIFIER	CAMK1D	ENSSSCG00000011111	Transcript	ENSSSCT00000012160.4	protein_coding	-	2/10	ENSSSCT00000012160.4:c.141-7945G>A	-	-	-	-	-	-	rs81426652	-	-1	-	HGNC	HGNC:19341	-	-	-	-	ENSSSCP00000011850	-	A0A4X1TGB0,F1RUP9	UPI001148BD10	-	-	Ensembl	-	-	-	-	-	-
ALGA0059679	10:59366987-59366987	T	intron_variant	MODIFIER	CAMK1D	ENSSSCG00000011111	Transcript	ENSSSCT00000026201.3	protein_coding	-	2/10	ENSSSCT00000026201.3:c.225-7945G>A	-	-	-	-	-	-	rs81426652	-	-1	-	HGNC	HGNC:19341	-	-	P1	-	ENSSSCP00000025648	-	I3LNH4	UPI001235EA19	-	-	Ensembl	-	-	-	-	-	-
ALGA0059679	10:59366987-59366987	T	intron_variant	MODIFIER	CAMK1D	ENSSSCG00000011111	Transcript	ENSSSCT00000089276.1	protein_coding	-	2/10	ENSSSCT00000089276.1:c.141-7945G>A	-	-	-	-	-	-	rs81426652	-	-1	-	HGNC	HGNC:19341	-	-	-	-	ENSSSCP00000060466	-	A0A5G2QEK8	UPI000A2B248F	-	-	Ensembl	-	-	-	-	-	-
ALGA0059679	10:59366987-59366987	T	intron_variant,non_coding_transcript_variant	MODIFIER	-	NM_001243935.1	Transcript	NM_001243935.1	cDNA	-	1/9	NM_001243935.1:n.133-7945G>A	-	-	-	-	-	-	rs81426652	-	-1	-	-	-	-	-	-	-	-	-	-	-	-	-	RefSeq	-	-	-	-	-	-
ALGA0059679	10:59366987-59366987	T	intron_variant	MODIFIER	CAMK1D	100511150	Transcript	XM_021063978.1	protein_coding	-	2/10	XM_021063978.1:c.243-7945G>A	-	-	-	-	-	-	rs81426652	-	-1	-	EntrezGene	HGNC:19341	-	-	-	-	XP_020919637.1	-	-	-	-	-	RefSeq	-	-	-	-	-	-
ALGA0059679	10:59366987-59366987	T	intron_variant	MODIFIER	CAMK1D	100511150	Transcript	XM_021063979.1	protein_coding	-	2/10	XM_021063979.1:c.225-7945G>A	-	-	-	-	-	-	rs81426652	-	-1	-	EntrezGene	HGNC:19341	-	-	-	-	XP_020919638.1	-	-	-	-	-	RefSeq	-	-	-	-	-	-
ALGA0059679	10:59366987-59366987	T	intron_variant	MODIFIER	CAMK1D	100511150	Transcript	XM_021063980.1	protein_coding	-	2/10	XM_021063980.1:c.147-7945G>A	-	-	-	-	-	-	rs81426652	-	-1	-	EntrezGene	HGNC:19341	-	-	-	-	XP_020919639.1	-	-	-	-	-	RefSeq	-	-	-	-	-	-
ALGA0059679	10:59366987-59366987	T	intron_variant	MODIFIER	CAMK1D	100511150	Transcript	XM_021063981.1	protein_coding	-	2/10	XM_021063981.1:c.141-7945G>A	-	-	-	-	-	-	rs81426652	-	-1	-	EntrezGene	HGNC:19341	-	-	-	-	XP_020919640.1	-	-	-	-	-	RefSeq	-	-	-	-	-	-
ALGA0059679	10:59366987-59366987	T	intron_variant	MODIFIER	CAMK1D	100511150	Transcript	XM_021063982.1	protein_coding	-	2/10	XM_021063982.1:c.141-7945G>A	-	-	-	-	-	-	rs81426652	-	-1	-	EntrezGene	HGNC:19341	-	-	-	-	XP_020919641.1	-	-	-	-	-	RefSeq	-	-	-	-	-	-
ALGA0059679	10:59366987-59366987	T	intron_variant	MODIFIER	CAMK1D	100511150	Transcript	XM_021063983.1	protein_coding	-	2/10	XM_021063983.1:c.-67-7945G>A	-	-	-	-	-	-	rs81426652	-	-1	-	EntrezGene	HGNC:19341	-	-	-	-	XP_020919642.1	-	-	-	-	-	RefSeq	-	-	-	-	-	-
ALGA0059679	10:59366987-59366987	T	intron_variant	MODIFIER	CAMK1D	100511150	Transcript	XM_021063984.1	protein_coding	-	2/10	XM_021063984.1:c.-67-7945G>A	-	-	-	-	-	-	rs81426652	-	-1	-	EntrezGene	HGNC:19341	-	-	-	-	XP_020919643.1	-	-	-	-	-	RefSeq	-	-	-	-	-	-
ALGA0059679	10:59366987-59366987	T	intron_variant	MODIFIER	CAMK1D	100511150	Transcript	XM_021063985.1	protein_coding	-	2/10	XM_021063985.1:c.-67-7945G>A	-	-	-	-	-	-	rs81426652	-	-1	-	EntrezGene	HGNC:19341	-	-	-	-	XP_020919644.1	-	-	-	-	-	RefSeq	-	-	-	-	-	-
WU_10.2_10_65833767	10:60094396-60094396	C	downstream_gene_variant	MODIFIER	UPF2	ENSSSCG00000011117	Transcript	ENSSSCT00000029333.3	protein_coding	-	-	-	-	-	-	-	-	-	rs325893851	4167	1	-	HGNC	HGNC:17854	-	-	P1	-	ENSSSCP00000027852	-	I3LUQ1	UPI00123400D7	-	-	Ensembl	-	-	-	-	-	-
WU_10.2_10_65833767	10:60094396-60094396	C	intron_variant,non_coding_transcript_variant	MODIFIER	-	ENSSSCG00000042633	Transcript	ENSSSCT00000068733.1	lncRNA	-	1/3	ENSSSCT00000068733.1:n.99-409A>G	-	-	-	-	-	-	rs325893851	-	-1	-	-	-	-	-	-	-	-	-	-	-	-	-	Ensembl	-	-	-	-	-	-
WU_10.2_10_65865601	10:60162708-60162708	A	intergenic_variant	MODIFIER	-	-	-	-	-	-	-	-	-	-	-	-	-	-	rs343400403	-	-	-	-	-	-	-	-	-	-	-	-	-	-	-	-	-	-	-	-	-	-
WU_10.2_10_67604202	10:61482845-61482845	A	intergenic_variant	MODIFIER	-	-	-	-	-	-	-	-	-	-	-	-	-	-	rs321095894	-	-	-	-	-	-	-	-	-	-	-	-	-	-	-	-	-	-	-	-	-	-
MARC0082829	10:61659189-61659189	G	intergenic_variant	MODIFIER	-	-	-	-	-	-	-	-	-	-	-	-	-	-	rs81266443	-	-	-	-	-	-	-	-	-	-	-	-	-	-	-	-	-	-	-	-	-	-
WU_10.2_10_68483334	10:62456618-62456618	A	intron_variant,non_coding_transcript_variant	MODIFIER	-	ENSSSCG00000043083	Transcript	ENSSSCT00000074874.1	lncRNA	-	4/6	ENSSSCT00000074874.1:n.605-26318G>A	-	-	-	-	-	-	rs327821829	-	1	-	-	-	-	-	-	-	-	-	-	-	-	-	Ensembl	-	-	-	-	-	-
WU_10.2_10_68483334	10:62456618-62456618	A	intron_variant,non_coding_transcript_variant	MODIFIER	-	ENSSSCG00000043083	Transcript	ENSSSCT00000076015.1	lncRNA	-	4/6	ENSSSCT00000076015.1:n.617-26318G>A	-	-	-	-	-	-	rs327821829	-	1	-	-	-	-	-	-	-	-	-	-	-	-	-	Ensembl	-	-	-	-	-	-
WU_10.2_10_71510454	10:65395052-65395052	G	downstream_gene_variant	MODIFIER	-	ENSSSCG00000047772	Transcript	ENSSSCT00000081781.1	lncRNA	-	-	-	-	-	-	-	-	-	rs325035325	287	-1	-	-	-	-	-	-	-	-	-	-	-	-	-	Ensembl	-	-	-	-	-	-
WU_10.2_10_71510454	10:65395052-65395052	G	upstream_gene_variant	MODIFIER	LOC106505210	106505210	Transcript	XM_021064285.1	protein_coding	-	-	-	-	-	-	-	-	-	rs325035325	2882	-1	-	EntrezGene	-	-	-	-	-	XP_020919944.1	-	-	-	-	-	RefSeq	-	-	-	-	-	-
WU_10.2_10_71510454	10:65395052-65395052	G	downstream_gene_variant	MODIFIER	LOC106505211	106505211	Transcript	XM_021065056.1	protein_coding	-	-	-	-	-	-	-	-	-	rs325035325	4469	-1	-	EntrezGene	-	-	-	-	-	XP_020920715.1	-	-	-	-	-	RefSeq	-	-	-	-	-	-
WU_10.2_10_72161660	10:65732984-65732984	T	intergenic_variant	MODIFIER	-	-	-	-	-	-	-	-	-	-	-	-	-	-	rs339529833	-	-	-	-	-	-	-	-	-	-	-	-	-	-	-	-	-	-	-	-	-	-
WU_10.2_10_73288716	10:66761956-66761956	T	intron_variant,non_coding_transcript_variant	MODIFIER	-	ENSSSCG00000036117	Transcript	ENSSSCT00000062744.1	lncRNA	-	1/8	ENSSSCT00000062744.1:n.929+19703G>T	-	-	-	-	-	-	rs337223686	-	1	-	-	-	-	-	-	-	-	-	-	-	-	-	Ensembl	-	-	-	-	-	-
WU_10.2_10_73288716	10:66761956-66761956	T	intron_variant,non_coding_transcript_variant	MODIFIER	-	ENSSSCG00000036117	Transcript	ENSSSCT00000065146.2	lncRNA	-	1/7	ENSSSCT00000065146.2:n.964+19703G>T	-	-	-	-	-	-	rs337223686	-	1	-	-	-	-	-	-	-	-	-	-	-	-	-	Ensembl	-	-	-	-	-	-
WU_10.2_10_74772710	10:68021996-68021996	G	intron_variant	MODIFIER	ADARB2	100521919	Transcript	XM_021065068.1	protein_coding	-	1/9	XM_021065068.1:c.-37+8213A>G	-	-	-	-	-	-	rs331272115	-	1	-	EntrezGene	-	-	-	-	-	XP_020920727.1	-	-	-	-	-	RefSeq	-	-	-	-	-	-
WU_10.2_10_74772710	10:68021996-68021996	G	intron_variant	MODIFIER	ADARB2	100521919	Transcript	XM_021065069.1	protein_coding	-	1/11	XM_021065069.1:c.-37+8213A>G	-	-	-	-	-	-	rs331272115	-	1	-	EntrezGene	-	-	-	-	-	XP_020920728.1	-	-	-	-	-	RefSeq	-	-	-	-	-	-
WU_10.2_10_76058695	10:68985067-68985067	A	intron_variant	MODIFIER	DIP2C	ENSSSCG00000011163	Transcript	ENSSSCT00000012225.4	protein_coding	-	4/38	ENSSSCT00000012225.4:c.436+14536G>A	-	-	-	-	-	-	rs326286627	-	1	-	HGNC	HGNC:29150	-	-	-	-	ENSSSCP00000011911	-	F1RX45	UPI001235E55D	-	-	Ensembl	-	-	-	-	-	-
WU_10.2_10_76058695	10:68985067-68985067	A	intron_variant	MODIFIER	DIP2C	ENSSSCG00000011163	Transcript	ENSSSCT00000042952.2	protein_coding	-	3/36	ENSSSCT00000042952.2:c.326-16355G>A	-	-	-	-	-	-	rs326286627	-	1	-	HGNC	HGNC:29150	-	-	-	-	ENSSSCP00000034119	-	A0A286ZRB0	UPI000BAD6A1C	-	-	Ensembl	-	-	-	-	-	-
WU_10.2_10_76058695	10:68985067-68985067	A	intron_variant	MODIFIER	DIP2C	ENSSSCG00000011163	Transcript	ENSSSCT00000051140.2	protein_coding	-	4/37	ENSSSCT00000051140.2:c.436+14536G>A	-	-	-	-	-	-	rs326286627	-	1	-	HGNC	HGNC:29150	-	-	-	-	ENSSSCP00000050298	-	A0A287B2G8	UPI000A2B031F	-	-	Ensembl	-	-	-	-	-	-
WU_10.2_10_76058695	10:68985067-68985067	A	intron_variant	MODIFIER	DIP2C	ENSSSCG00000011163	Transcript	ENSSSCT00000051146.1	protein_coding	-	3/36	ENSSSCT00000051146.1:c.268+14536G>A	-	-	-	-	-	-	rs326286627	-	1	-	HGNC	HGNC:29150	-	-	P1	-	ENSSSCP00000054697	-	A0A287BDU4	UPI000A2B27E4	-	-	Ensembl	-	-	-	-	-	-
WU_10.2_10_76058695	10:68985067-68985067	A	intron_variant	MODIFIER	DIP2C	ENSSSCG00000011163	Transcript	ENSSSCT00000051221.2	protein_coding	-	5/35	ENSSSCT00000051221.2:c.217+14536G>A	-	-	-	-	-	-	rs326286627	-	1	-	HGNC	HGNC:29150	-	-	-	-	ENSSSCP00000056851	-	A0A287BKC3	UPI0012368E12	-	-	Ensembl	-	-	-	-	-	-
WU_10.2_10_76058695	10:68985067-68985067	A	intron_variant	MODIFIER	DIP2C	ENSSSCG00000011163	Transcript	ENSSSCT00000079576.1	protein_coding	-	3/36	ENSSSCT00000079576.1:c.277+14536G>A	-	-	-	-	-	-	rs326286627	-	1	-	HGNC	HGNC:29150	-	-	-	-	ENSSSCP00000064512	-	A0A5G2QJ75	UPI0012342546	-	-	Ensembl	-	-	-	-	-	-
WU_10.2_10_76058695	10:68985067-68985067	A	intron_variant	MODIFIER	DIP2C	100739614	Transcript	XM_021065074.1	protein_coding	-	4/36	XM_021065074.1:c.436+14536G>A	-	-	-	-	-	-	rs326286627	-	1	-	EntrezGene	HGNC:29150	-	-	-	-	XP_020920733.1	-	-	-	-	-	RefSeq	-	-	-	-	-	-
WU_10.2_10_76058695	10:68985067-68985067	A	intron_variant	MODIFIER	DIP2C	100739614	Transcript	XM_021065075.1	protein_coding	-	3/35	XM_021065075.1:c.268+14536G>A	-	-	-	-	-	-	rs326286627	-	1	-	EntrezGene	HGNC:29150	-	-	-	-	XP_020920734.1	-	-	-	-	-	RefSeq	-	-	-	-	-	-
WU_10.2_10_76058695	10:68985067-68985067	A	intron_variant	MODIFIER	DIP2C	100739614	Transcript	XM_021065076.1	protein_coding	-	3/35	XM_021065076.1:c.217+14536G>A	-	-	-	-	-	-	rs326286627	-	1	-	EntrezGene	HGNC:29150	-	-	-	-	XP_020920735.1	-	-	-	-	-	RefSeq	-	-	-	-	-	-
WU_10.2_10_76058695	10:68985067-68985067	A	intron_variant	MODIFIER	DIP2C	100739614	Transcript	XM_021065077.1	protein_coding	-	4/37	XM_021065077.1:c.436+14536G>A	-	-	-	-	-	-	rs326286627	-	1	-	EntrezGene	HGNC:29150	-	-	-	-	XP_020920736.1	-	-	-	-	-	RefSeq	-	-	-	-	-	-
WU_10.2_10_76058695	10:68985067-68985067	A	upstream_gene_variant	MODIFIER	DIP2C	100739614	Transcript	XM_021065078.1	protein_coding	-	-	-	-	-	-	-	-	-	rs326286627	3894	1	-	EntrezGene	HGNC:29150	-	-	-	-	XP_020920737.1	-	-	-	-	-	RefSeq	-	-	-	-	-	-
WU_10.2_10_76058695	10:68985067-68985067	A	intron_variant	MODIFIER	DIP2C	100739614	Transcript	XM_021065079.1	protein_coding	-	3/36	XM_021065079.1:c.268+14536G>A	-	-	-	-	-	-	rs326286627	-	1	-	EntrezGene	HGNC:29150	-	-	-	-	XP_020920738.1	-	-	-	-	-	RefSeq	-	-	-	-	-	-
WU_10.2_10_76058695	10:68985067-68985067	A	intron_variant	MODIFIER	DIP2C	100739614	Transcript	XM_021065080.1	protein_coding	-	4/36	XM_021065080.1:c.217+14536G>A	-	-	-	-	-	-	rs326286627	-	1	-	EntrezGene	HGNC:29150	-	-	-	-	XP_020920739.1	-	-	-	-	-	RefSeq	-	-	-	-	-	-
WU_10.2_10_76058695	10:68985067-68985067	A	intron_variant	MODIFIER	DIP2C	100739614	Transcript	XM_021065081.1	protein_coding	-	4/36	XM_021065081.1:c.217+14536G>A	-	-	-	-	-	-	rs326286627	-	1	-	EntrezGene	HGNC:29150	-	-	-	-	XP_020920740.1	-	-	-	-	-	RefSeq	-	-	-	-	-	-
ASGA0049184	11:2146595-2146595	T	intergenic_variant	MODIFIER	-	-	-	-	-	-	-	-	-	-	-	-	-	-	rs81429774	-	-	-	-	-	-	-	-	-	-	-	-	-	-	-	-	-	-	-	-	-	-
ASGA0049287	11:3635808-3635808	A	intron_variant	MODIFIER	ATP8A2	ENSSSCG00000035421	Transcript	ENSSSCT00000052770.2	protein_coding	-	27/37	ENSSSCT00000052770.2:c.2680-249G>A	-	-	-	-	-	-	rs80808043	-	1	-	HGNC	HGNC:13533	-	-	P5	-	ENSSSCP00000042799	-	A0A287AFK3,A0A4X1TTM0	UPI000A2B37A9	-	-	Ensembl	-	-	-	-	-	-
ASGA0049287	11:3635808-3635808	A	intron_variant	MODIFIER	ATP8A2	ENSSSCG00000035421	Transcript	ENSSSCT00000063748.2	protein_coding	-	27/37	ENSSSCT00000063748.2:c.2560-249G>A	-	-	-	-	-	-	rs80808043	-	1	-	HGNC	HGNC:13533	-	-	A1	-	ENSSSCP00000040750	-	A0A286ZR96,A0A4X1TYL0	UPI000A2B480B	-	-	Ensembl	-	-	-	-	-	-
ASGA0049287	11:3635808-3635808	A	intron_variant	MODIFIER	LOC100523747	100523747	Transcript	XM_021065475.1	protein_coding	-	27/36	XM_021065475.1:c.2827-249G>A	-	-	-	-	-	-	rs80808043	-	1	-	EntrezGene	-	-	-	-	-	XP_020921134.1	-	-	-	-	-	RefSeq	-	-	-	-	-	-
ASGA0049287	11:3635808-3635808	A	intron_variant	MODIFIER	LOC100523747	100523747	Transcript	XM_021065476.1	protein_coding	-	27/36	XM_021065476.1:c.2827-249G>A	-	-	-	-	-	-	rs80808043	-	1	-	EntrezGene	-	-	-	-	-	XP_020921135.1	-	-	-	-	-	RefSeq	-	-	-	-	-	-
ASGA0049287	11:3635808-3635808	A	intron_variant	MODIFIER	LOC100523747	100523747	Transcript	XM_021065477.1	protein_coding	-	27/35	XM_021065477.1:c.2827-249G>A	-	-	-	-	-	-	rs80808043	-	1	-	EntrezGene	-	-	-	-	-	XP_020921136.1	-	-	-	-	-	RefSeq	-	-	-	-	-	-
ASGA0049287	11:3635808-3635808	A	intron_variant	MODIFIER	LOC100523747	100523747	Transcript	XM_021065478.1	protein_coding	-	27/36	XM_021065478.1:c.2680-249G>A	-	-	-	-	-	-	rs80808043	-	1	-	EntrezGene	-	-	-	-	-	XP_020921137.1	-	-	-	-	-	RefSeq	-	-	-	-	-	-
ASGA0049287	11:3635808-3635808	A	intron_variant	MODIFIER	LOC100523747	100523747	Transcript	XM_021065479.1	protein_coding	-	28/37	XM_021065479.1:c.2632-249G>A	-	-	-	-	-	-	rs80808043	-	1	-	EntrezGene	-	-	-	-	-	XP_020921138.1	-	-	-	-	-	RefSeq	-	-	-	-	-	-
ASGA0049287	11:3635808-3635808	A	intron_variant	MODIFIER	LOC100523747	100523747	Transcript	XM_021065480.1	protein_coding	-	29/38	XM_021065480.1:c.2632-249G>A	-	-	-	-	-	-	rs80808043	-	1	-	EntrezGene	-	-	-	-	-	XP_020921139.1	-	-	-	-	-	RefSeq	-	-	-	-	-	-
ASGA0049287	11:3635808-3635808	A	intron_variant	MODIFIER	LOC100523747	100523747	Transcript	XM_021065481.1	protein_coding	-	29/38	XM_021065481.1:c.2632-249G>A	-	-	-	-	-	-	rs80808043	-	1	-	EntrezGene	-	-	-	-	-	XP_020921140.1	-	-	-	-	-	RefSeq	-	-	-	-	-	-
ASGA0049287	11:3635808-3635808	A	intron_variant	MODIFIER	LOC100523747	100523747	Transcript	XM_021065482.1	protein_coding	-	27/36	XM_021065482.1:c.2617-249G>A	-	-	-	-	-	-	rs80808043	-	1	-	EntrezGene	-	-	-	-	-	XP_020921141.1	-	-	-	-	-	RefSeq	-	-	-	-	-	-
ASGA0049287	11:3635808-3635808	A	intron_variant	MODIFIER	LOC100523747	100523747	Transcript	XM_021065483.1	protein_coding	-	27/36	XM_021065483.1:c.2560-249G>A	-	-	-	-	-	-	rs80808043	-	1	-	EntrezGene	-	-	-	-	-	XP_020921142.1	-	-	-	-	-	RefSeq	-	-	-	-	-	-
ASGA0049287	11:3635808-3635808	A	intron_variant	MODIFIER	LOC100523747	100523747	Transcript	XM_021065484.1	protein_coding	-	27/36	XM_021065484.1:c.2560-249G>A	-	-	-	-	-	-	rs80808043	-	1	-	EntrezGene	-	-	-	-	-	XP_020921143.1	-	-	-	-	-	RefSeq	-	-	-	-	-	-
ASGA0049287	11:3635808-3635808	A	intron_variant	MODIFIER	LOC100523747	100523747	Transcript	XM_021065485.1	protein_coding	-	27/36	XM_021065485.1:c.2560-249G>A	-	-	-	-	-	-	rs80808043	-	1	-	EntrezGene	-	-	-	-	-	XP_020921144.1	-	-	-	-	-	RefSeq	-	-	-	-	-	-
ASGA0049287	11:3635808-3635808	A	intron_variant	MODIFIER	LOC100523747	100523747	Transcript	XM_021065486.1	protein_coding	-	27/36	XM_021065486.1:c.2560-249G>A	-	-	-	-	-	-	rs80808043	-	1	-	EntrezGene	-	-	-	-	-	XP_020921145.1	-	-	-	-	-	RefSeq	-	-	-	-	-	-
ASGA0049287	11:3635808-3635808	A	intron_variant	MODIFIER	LOC100523747	100523747	Transcript	XM_021065487.1	protein_coding	-	28/37	XM_021065487.1:c.2560-249G>A	-	-	-	-	-	-	rs80808043	-	1	-	EntrezGene	-	-	-	-	-	XP_020921146.1	-	-	-	-	-	RefSeq	-	-	-	-	-	-
ASGA0049287	11:3635808-3635808	A	intron_variant	MODIFIER	LOC100523747	100523747	Transcript	XM_021065488.1	protein_coding	-	27/36	XM_021065488.1:c.2560-249G>A	-	-	-	-	-	-	rs80808043	-	1	-	EntrezGene	-	-	-	-	-	XP_020921147.1	-	-	-	-	-	RefSeq	-	-	-	-	-	-
ASGA0049287	11:3635808-3635808	A	intron_variant	MODIFIER	LOC100523747	100523747	Transcript	XM_021065489.1	protein_coding	-	27/36	XM_021065489.1:c.2560-249G>A	-	-	-	-	-	-	rs80808043	-	1	-	EntrezGene	-	-	-	-	-	XP_020921148.1	-	-	-	-	-	RefSeq	-	-	-	-	-	-
ASGA0049287	11:3635808-3635808	A	intron_variant	MODIFIER	LOC100523747	100523747	Transcript	XM_021065490.1	protein_coding	-	27/36	XM_021065490.1:c.2560-249G>A	-	-	-	-	-	-	rs80808043	-	1	-	EntrezGene	-	-	-	-	-	XP_020921149.1	-	-	-	-	-	RefSeq	-	-	-	-	-	-
WU_10.2_11_5698241	11:5981222-5981222	A	intron_variant	MODIFIER	MTUS2	ENSSSCG00000025996	Transcript	ENSSSCT00000024217.3	protein_coding	-	5/19	ENSSSCT00000024217.3:c.-391+18418C>A	-	-	-	-	-	-	rs329737464	-	1	-	HGNC	HGNC:20595	-	-	-	-	ENSSSCP00000027685	-	I3LU86	UPI000BAD8289	-	-	Ensembl	-	-	-	-	-	-
WU_10.2_11_5698241	11:5981222-5981222	A	downstream_gene_variant	MODIFIER	SLC46A3	ENSSSCG00000009322	Transcript	ENSSSCT00000041977.2	protein_coding	-	-	-	-	-	-	-	-	-	rs329737464	1207	-1	-	HGNC	HGNC:27501	-	-	P1	-	ENSSSCP00000044612	-	M3UZC6,A0A4X1TKX8	UPI000210661D	-	-	Ensembl	-	-	-	-	-	-
WU_10.2_11_5698241	11:5981222-5981222	A	downstream_gene_variant	MODIFIER	SLC46A3	ENSSSCG00000009322	Transcript	ENSSSCT00000048132.2	protein_coding	-	-	-	-	-	-	-	-	-	rs329737464	1207	-1	-	HGNC	HGNC:27501	-	-	-	-	ENSSSCP00000047625	-	A0A287AUL9,A0A4X1TL79	UPI000BAD7711	-	-	Ensembl	-	-	-	-	-	-
WU_10.2_11_5698241	11:5981222-5981222	A	intron_variant	MODIFIER	MTUS2	ENSSSCG00000025996	Transcript	ENSSSCT00000061559.2	protein_coding	-	5/19	ENSSSCT00000061559.2:c.-391+18418C>A	-	-	-	-	-	-	rs329737464	-	1	-	HGNC	HGNC:20595	-	-	-	-	ENSSSCP00000036086	-	A0A286ZX95	UPI000BAD73AD	-	-	Ensembl	-	-	-	-	-	-
WU_10.2_11_5698241	11:5981222-5981222	A	intron_variant	MODIFIER	MTUS2	ENSSSCG00000025996	Transcript	ENSSSCT00000063663.2	protein_coding	-	5/20	ENSSSCT00000063663.2:c.-391+18418C>A	-	-	-	-	-	-	rs329737464	-	1	-	HGNC	HGNC:20595	-	-	-	-	ENSSSCP00000040205	-	A0A287A8D9	UPI000A2B4AAF	-	-	Ensembl	-	-	-	-	-	-
WU_10.2_11_5698241	11:5981222-5981222	A	downstream_gene_variant	MODIFIER	SLC46A3	100154155	Transcript	XM_021065096.1	protein_coding	-	-	-	-	-	-	-	-	-	rs329737464	4773	-1	-	EntrezGene	HGNC:27501	-	-	-	-	XP_020920755.1	-	-	-	-	-	RefSeq	-	-	-	-	-	-
WU_10.2_11_5698241	11:5981222-5981222	A	downstream_gene_variant	MODIFIER	SLC46A3	100154155	Transcript	XM_021065097.1	protein_coding	-	-	-	-	-	-	-	-	-	rs329737464	4773	-1	-	EntrezGene	HGNC:27501	-	-	-	-	XP_020920756.1	-	-	-	-	-	RefSeq	-	-	-	-	-	-
WU_10.2_11_5698241	11:5981222-5981222	A	downstream_gene_variant	MODIFIER	SLC46A3	100154155	Transcript	XM_021065098.1	protein_coding	-	-	-	-	-	-	-	-	-	rs329737464	1976	-1	-	EntrezGene	HGNC:27501	-	-	-	-	XP_020920757.1	-	-	-	-	-	RefSeq	-	-	-	-	-	-
ALGA0060524	11:6291044-6291044	T	intron_variant	MODIFIER	MTUS2	ENSSSCG00000025996	Transcript	ENSSSCT00000024217.3	protein_coding	-	10/19	ENSSSCT00000024217.3:c.2566+49145C>T	-	-	-	-	-	-	rs80803790	-	1	-	HGNC	HGNC:20595	-	-	-	-	ENSSSCP00000027685	-	I3LU86	UPI000BAD8289	-	-	Ensembl	-	-	-	-	-	-
ALGA0060524	11:6291044-6291044	T	intron_variant	MODIFIER	MTUS2	ENSSSCG00000025996	Transcript	ENSSSCT00000061559.2	protein_coding	-	10/19	ENSSSCT00000061559.2:c.2566+49145C>T	-	-	-	-	-	-	rs80803790	-	1	-	HGNC	HGNC:20595	-	-	-	-	ENSSSCP00000036086	-	A0A286ZX95	UPI000BAD73AD	-	-	Ensembl	-	-	-	-	-	-
ALGA0060524	11:6291044-6291044	T	intron_variant	MODIFIER	MTUS2	ENSSSCG00000025996	Transcript	ENSSSCT00000063663.2	protein_coding	-	10/20	ENSSSCT00000063663.2:c.2566+49145C>T	-	-	-	-	-	-	rs80803790	-	1	-	HGNC	HGNC:20595	-	-	-	-	ENSSSCP00000040205	-	A0A287A8D9	UPI000A2B4AAF	-	-	Ensembl	-	-	-	-	-	-
ALGA0060524	11:6291044-6291044	T	intron_variant	MODIFIER	MTUS2	ENSSSCG00000025996	Transcript	ENSSSCT00000083668.1	protein_coding	-	3/14	ENSSSCT00000083668.1:c.2446+49145C>T	-	-	-	-	-	-	rs80803790	-	1	-	HGNC	HGNC:20595	-	-	-	-	ENSSSCP00000066283	-	A0A5G2QWG8	UPI001234B1A8	-	-	Ensembl	-	-	-	-	-	-
ALGA0060524	11:6291044-6291044	T	intron_variant	MODIFIER	MTUS2	100157816	Transcript	XM_021065168.1	protein_coding	-	5/15	XM_021065168.1:c.2566+49145C>T	-	-	-	-	-	-	rs80803790	-	1	-	EntrezGene	HGNC:20595	-	-	-	-	XP_020920827.1	-	-	-	-	-	RefSeq	-	-	-	-	-	-
ALGA0060524	11:6291044-6291044	T	intron_variant	MODIFIER	MTUS2	100157816	Transcript	XM_021065169.1	protein_coding	-	5/15	XM_021065169.1:c.2566+49145C>T	-	-	-	-	-	-	rs80803790	-	1	-	EntrezGene	HGNC:20595	-	-	-	-	XP_020920828.1	-	-	-	-	-	RefSeq	-	-	-	-	-	-
ALGA0060524	11:6291044-6291044	T	intron_variant	MODIFIER	MTUS2	100157816	Transcript	XM_021065170.1	protein_coding	-	6/16	XM_021065170.1:c.2566+49145C>T	-	-	-	-	-	-	rs80803790	-	1	-	EntrezGene	HGNC:20595	-	-	-	-	XP_020920829.1	-	-	-	-	-	RefSeq	-	-	-	-	-	-
ALGA0060524	11:6291044-6291044	T	intron_variant	MODIFIER	MTUS2	100157816	Transcript	XM_021065171.1	protein_coding	-	5/15	XM_021065171.1:c.2566+49145C>T	-	-	-	-	-	-	rs80803790	-	1	-	EntrezGene	HGNC:20595	-	-	-	-	XP_020920830.1	-	-	-	-	-	RefSeq	-	-	-	-	-	-
ALGA0060524	11:6291044-6291044	T	intron_variant	MODIFIER	MTUS2	100157816	Transcript	XM_021065172.1	protein_coding	-	4/14	XM_021065172.1:c.2566+49145C>T	-	-	-	-	-	-	rs80803790	-	1	-	EntrezGene	HGNC:20595	-	-	-	-	XP_020920831.1	-	-	-	-	-	RefSeq	-	-	-	-	-	-
ALGA0060524	11:6291044-6291044	T	intron_variant	MODIFIER	MTUS2	100157816	Transcript	XM_021065173.1	protein_coding	-	4/14	XM_021065173.1:c.2566+49145C>T	-	-	-	-	-	-	rs80803790	-	1	-	EntrezGene	HGNC:20595	-	-	-	-	XP_020920832.1	-	-	-	-	-	RefSeq	-	-	-	-	-	-
ALGA0060524	11:6291044-6291044	T	intron_variant	MODIFIER	MTUS2	100157816	Transcript	XM_021065174.1	protein_coding	-	4/14	XM_021065174.1:c.2566+49145C>T	-	-	-	-	-	-	rs80803790	-	1	-	EntrezGene	HGNC:20595	-	-	-	-	XP_020920833.1	-	-	-	-	-	RefSeq	-	-	-	-	-	-
WU_10.2_11_12794625	11:12806465-12806465	C	intron_variant	MODIFIER	ALG5	ENSSSCG00000009360	Transcript	ENSSSCT00000010257.4	protein_coding	-	5/9	ENSSSCT00000010257.4:c.444+934A>G	-	-	-	-	-	-	rs322897287	-	-1	-	EntrezGene	-	-	-	P1	-	ENSSSCP00000009990	-	F1RS38,A0A4X1T2U6	UPI0001E87C9D	-	-	Ensembl	-	-	-	-	-	-
WU_10.2_11_12794625	11:12806465-12806465	C	intron_variant	MODIFIER	ALG5	ENSSSCG00000009360	Transcript	ENSSSCT00000063775.2	protein_coding	-	4/8	ENSSSCT00000063775.2:c.354+934A>G	-	-	-	-	-	-	rs322897287	-	-1	-	EntrezGene	-	-	-	-	-	ENSSSCP00000047786	-	A0A287AV93,A0A4X1T3N6	UPI0001E87C9E	-	-	Ensembl	-	-	-	-	-	-
WU_10.2_11_12794625	11:12806465-12806465	C	intron_variant,non_coding_transcript_variant	MODIFIER	-	NM_001244320.2	Transcript	NM_001244320.2	cDNA	-	5/9	NM_001244320.2:n.471+934A>G	-	-	-	-	-	-	rs322897287	-	-1	-	-	-	-	-	-	-	-	-	-	-	-	-	RefSeq	-	-	-	-	-	-
ALGA0061249	11:20241233-20241233	T	intergenic_variant	MODIFIER	-	-	-	-	-	-	-	-	-	-	-	-	-	-	rs80792055	-	-	-	-	-	-	-	-	-	-	-	-	-	-	-	-	-	-	-	-	-	-
ASGA0050339	11:23539215-23539215	G	intron_variant	MODIFIER	ENOX1	ENSSSCG00000021818	Transcript	ENSSSCT00000022928.3	protein_coding	-	2/16	ENSSSCT00000022928.3:c.-203-26317A>G	-	-	-	-	-	-	rs81430453	-	1	-	HGNC	HGNC:25474	-	-	A2	-	ENSSSCP00000023853	-	I3LIE8	UPI00123704E2	-	-	Ensembl	-	-	-	-	-	-
ASGA0050339	11:23539215-23539215	G	intron_variant	MODIFIER	ENOX1	ENSSSCG00000021818	Transcript	ENSSSCT00000045599.2	protein_coding	-	3/18	ENSSSCT00000045599.2:c.-203-26317A>G	-	-	-	-	-	-	rs81430453	-	1	-	HGNC	HGNC:25474	-	-	A2	-	ENSSSCP00000042330	-	A0A287AE87	UPI000A2B50B8	-	-	Ensembl	-	-	-	-	-	-
ASGA0050339	11:23539215-23539215	G	intron_variant	MODIFIER	ENOX1	100525605	Transcript	XM_021065348.1	protein_coding	-	3/18	XM_021065348.1:c.-203-26317A>G	-	-	-	-	-	-	rs81430453	-	1	-	EntrezGene	HGNC:25474	-	-	-	-	XP_020921007.1	-	-	-	-	-	RefSeq	-	-	-	-	-	-
ASGA0050339	11:23539215-23539215	G	intron_variant	MODIFIER	ENOX1	100525605	Transcript	XM_021065349.1	protein_coding	-	4/19	XM_021065349.1:c.-204+4109A>G	-	-	-	-	-	-	rs81430453	-	1	-	EntrezGene	HGNC:25474	-	-	-	-	XP_020921008.1	-	-	-	-	-	RefSeq	-	-	-	-	-	-
ASGA0050339	11:23539215-23539215	G	intron_variant	MODIFIER	ENOX1	100525605	Transcript	XM_021065350.1	protein_coding	-	3/18	XM_021065350.1:c.-200-26320A>G	-	-	-	-	-	-	rs81430453	-	1	-	EntrezGene	HGNC:25474	-	-	-	-	XP_020921009.1	-	-	-	-	-	RefSeq	-	-	-	-	-	-
ASGA0050339	11:23539215-23539215	G	intron_variant	MODIFIER	ENOX1	100525605	Transcript	XM_021065351.1	protein_coding	-	2/17	XM_021065351.1:c.-203-26317A>G	-	-	-	-	-	-	rs81430453	-	1	-	EntrezGene	HGNC:25474	-	-	-	-	XP_020921010.1	-	-	-	-	-	RefSeq	-	-	-	-	-	-
ASGA0050339	11:23539215-23539215	G	intron_variant	MODIFIER	ENOX1	100525605	Transcript	XM_021065352.1	protein_coding	-	2/17	XM_021065352.1:c.-203-26317A>G	-	-	-	-	-	-	rs81430453	-	1	-	EntrezGene	HGNC:25474	-	-	-	-	XP_020921011.1	-	-	-	-	-	RefSeq	-	-	-	-	-	-
ASGA0050339	11:23539215-23539215	G	intron_variant	MODIFIER	ENOX1	100525605	Transcript	XM_021065353.1	protein_coding	-	2/17	XM_021065353.1:c.-203-26317A>G	-	-	-	-	-	-	rs81430453	-	1	-	EntrezGene	HGNC:25474	-	-	-	-	XP_020921012.1	-	-	-	-	-	RefSeq	-	-	-	-	-	-
ASGA0050339	11:23539215-23539215	G	intron_variant	MODIFIER	ENOX1	100525605	Transcript	XM_021065354.1	protein_coding	-	3/17	XM_021065354.1:c.-275-26317A>G	-	-	-	-	-	-	rs81430453	-	1	-	EntrezGene	HGNC:25474	-	-	-	-	XP_020921013.1	-	-	-	-	-	RefSeq	-	-	-	-	-	-
ASGA0050339	11:23539215-23539215	G	intron_variant	MODIFIER	ENOX1	100525605	Transcript	XM_021065356.1	protein_coding	-	3/17	XM_021065356.1:c.-272-26320A>G	-	-	-	-	-	-	rs81430453	-	1	-	EntrezGene	HGNC:25474	-	-	-	-	XP_020921015.1	-	-	-	-	-	RefSeq	-	-	-	-	-	-
ASGA0050339	11:23539215-23539215	G	intron_variant	MODIFIER	ENOX1	100525605	Transcript	XM_021065357.1	protein_coding	-	2/16	XM_021065357.1:c.-275-26317A>G	-	-	-	-	-	-	rs81430453	-	1	-	EntrezGene	HGNC:25474	-	-	-	-	XP_020921016.1	-	-	-	-	-	RefSeq	-	-	-	-	-	-
ASGA0050363	11:23744898-23744898	C	intron_variant	MODIFIER	ENOX1	ENSSSCG00000021818	Transcript	ENSSSCT00000022928.3	protein_coding	-	9/16	ENSSSCT00000022928.3:c.965-5827T>C	-	-	-	-	-	-	rs81430502	-	1	-	HGNC	HGNC:25474	-	-	A2	-	ENSSSCP00000023853	-	I3LIE8	UPI00123704E2	-	-	Ensembl	-	-	-	-	-	-
ASGA0050363	11:23744898-23744898	C	intron_variant	MODIFIER	ENOX1	ENSSSCG00000021818	Transcript	ENSSSCT00000045599.2	protein_coding	-	11/18	ENSSSCT00000045599.2:c.1199-5827T>C	-	-	-	-	-	-	rs81430502	-	1	-	HGNC	HGNC:25474	-	-	A2	-	ENSSSCP00000042330	-	A0A287AE87	UPI000A2B50B8	-	-	Ensembl	-	-	-	-	-	-
ASGA0050363	11:23744898-23744898	C	intron_variant	MODIFIER	ENOX1	ENSSSCG00000021818	Transcript	ENSSSCT00000062725.2	protein_coding	-	7/14	ENSSSCT00000062725.2:c.1394-5827T>C	-	-	-	-	-	-	rs81430502	-	1	-	HGNC	HGNC:25474	-	-	P5	-	ENSSSCP00000054653	-	A0A287BDN7	UPI000A2B02EC	-	-	Ensembl	-	-	-	-	-	-
ASGA0050363	11:23744898-23744898	C	intron_variant	MODIFIER	ENOX1	100525605	Transcript	XM_021065347.1	protein_coding	-	7/14	XM_021065347.1:c.1394-5827T>C	-	-	-	-	-	-	rs81430502	-	1	-	EntrezGene	HGNC:25474	-	-	-	-	XP_020921006.1	-	-	-	-	-	RefSeq	-	-	-	-	-	-
ASGA0050363	11:23744898-23744898	C	intron_variant	MODIFIER	ENOX1	100525605	Transcript	XM_021065348.1	protein_coding	-	11/18	XM_021065348.1:c.1199-5827T>C	-	-	-	-	-	-	rs81430502	-	1	-	EntrezGene	HGNC:25474	-	-	-	-	XP_020921007.1	-	-	-	-	-	RefSeq	-	-	-	-	-	-
ASGA0050363	11:23744898-23744898	C	intron_variant	MODIFIER	ENOX1	100525605	Transcript	XM_021065349.1	protein_coding	-	12/19	XM_021065349.1:c.1199-5827T>C	-	-	-	-	-	-	rs81430502	-	1	-	EntrezGene	HGNC:25474	-	-	-	-	XP_020921008.1	-	-	-	-	-	RefSeq	-	-	-	-	-	-
ASGA0050363	11:23744898-23744898	C	intron_variant	MODIFIER	ENOX1	100525605	Transcript	XM_021065350.1	protein_coding	-	11/18	XM_021065350.1:c.1199-5827T>C	-	-	-	-	-	-	rs81430502	-	1	-	EntrezGene	HGNC:25474	-	-	-	-	XP_020921009.1	-	-	-	-	-	RefSeq	-	-	-	-	-	-
ASGA0050363	11:23744898-23744898	C	intron_variant	MODIFIER	ENOX1	100525605	Transcript	XM_021065351.1	protein_coding	-	10/17	XM_021065351.1:c.1199-5827T>C	-	-	-	-	-	-	rs81430502	-	1	-	EntrezGene	HGNC:25474	-	-	-	-	XP_020921010.1	-	-	-	-	-	RefSeq	-	-	-	-	-	-
ASGA0050363	11:23744898-23744898	C	intron_variant	MODIFIER	ENOX1	100525605	Transcript	XM_021065352.1	protein_coding	-	10/17	XM_021065352.1:c.1199-5827T>C	-	-	-	-	-	-	rs81430502	-	1	-	EntrezGene	HGNC:25474	-	-	-	-	XP_020921011.1	-	-	-	-	-	RefSeq	-	-	-	-	-	-
ASGA0050363	11:23744898-23744898	C	intron_variant	MODIFIER	ENOX1	100525605	Transcript	XM_021065353.1	protein_coding	-	10/17	XM_021065353.1:c.1199-5827T>C	-	-	-	-	-	-	rs81430502	-	1	-	EntrezGene	HGNC:25474	-	-	-	-	XP_020921012.1	-	-	-	-	-	RefSeq	-	-	-	-	-	-
ASGA0050363	11:23744898-23744898	C	intron_variant	MODIFIER	ENOX1	100525605	Transcript	XM_021065354.1	protein_coding	-	10/17	XM_021065354.1:c.980-5827T>C	-	-	-	-	-	-	rs81430502	-	1	-	EntrezGene	HGNC:25474	-	-	-	-	XP_020921013.1	-	-	-	-	-	RefSeq	-	-	-	-	-	-
ASGA0050363	11:23744898-23744898	C	intron_variant	MODIFIER	ENOX1	100525605	Transcript	XM_021065355.1	protein_coding	-	7/14	XM_021065355.1:c.980-5827T>C	-	-	-	-	-	-	rs81430502	-	1	-	EntrezGene	HGNC:25474	-	-	-	-	XP_020921014.1	-	-	-	-	-	RefSeq	-	-	-	-	-	-
ASGA0050363	11:23744898-23744898	C	intron_variant	MODIFIER	ENOX1	100525605	Transcript	XM_021065356.1	protein_coding	-	10/17	XM_021065356.1:c.980-5827T>C	-	-	-	-	-	-	rs81430502	-	1	-	EntrezGene	HGNC:25474	-	-	-	-	XP_020921015.1	-	-	-	-	-	RefSeq	-	-	-	-	-	-
ASGA0050363	11:23744898-23744898	C	intron_variant	MODIFIER	ENOX1	100525605	Transcript	XM_021065357.1	protein_coding	-	9/16	XM_021065357.1:c.980-5827T>C	-	-	-	-	-	-	rs81430502	-	1	-	EntrezGene	HGNC:25474	-	-	-	-	XP_020921016.1	-	-	-	-	-	RefSeq	-	-	-	-	-	-
ASGA0050363	11:23744898-23744898	C	intron_variant	MODIFIER	ENOX1	100525605	Transcript	XM_021065358.1	protein_coding	-	5/12	XM_021065358.1:c.791-5827T>C	-	-	-	-	-	-	rs81430502	-	1	-	EntrezGene	HGNC:25474	-	-	-	-	XP_020921017.1	-	-	-	-	-	RefSeq	-	-	-	-	-	-
ASGA0050363	11:23744898-23744898	C	intron_variant	MODIFIER	ENOX1	100525605	Transcript	XM_021065359.1	protein_coding	-	5/12	XM_021065359.1:c.791-5827T>C	-	-	-	-	-	-	rs81430502	-	1	-	EntrezGene	HGNC:25474	-	-	-	-	XP_020921018.1	-	-	-	-	-	RefSeq	-	-	-	-	-	-
ASGA0050363	11:23744898-23744898	C	intron_variant	MODIFIER	ENOX1	100525605	Transcript	XM_021065360.1	protein_coding	-	7/9	XM_021065360.1:c.1394-5827T>C	-	-	-	-	-	-	rs81430502	-	1	-	EntrezGene	HGNC:25474	-	-	-	-	XP_020921019.1	-	-	-	-	-	RefSeq	-	-	-	-	-	-
ASGA0050363	11:23744898-23744898	C	intron_variant	MODIFIER	ENOX1	100525605	Transcript	XM_021065361.1	protein_coding	-	8/15	XM_021065361.1:c.980-5827T>C	-	-	-	-	-	-	rs81430502	-	1	-	EntrezGene	HGNC:25474	-	-	-	-	XP_020921020.1	-	-	-	-	-	RefSeq	-	-	-	-	-	-
WU_10.2_11_24256265	11:23803178-23803178	A	intron_variant	MODIFIER	ENOX1	ENSSSCG00000021818	Transcript	ENSSSCT00000022928.3	protein_coding	-	12/16	ENSSSCT00000022928.3:c.1375-16722C>A	-	-	-	-	-	-	rs327269504	-	1	-	HGNC	HGNC:25474	-	-	A2	-	ENSSSCP00000023853	-	I3LIE8	UPI00123704E2	-	-	Ensembl	-	-	-	-	-	-
WU_10.2_11_24256265	11:23803178-23803178	A	intron_variant	MODIFIER	ENOX1	ENSSSCG00000021818	Transcript	ENSSSCT00000045599.2	protein_coding	-	14/18	ENSSSCT00000045599.2:c.1609-16722C>A	-	-	-	-	-	-	rs327269504	-	1	-	HGNC	HGNC:25474	-	-	A2	-	ENSSSCP00000042330	-	A0A287AE87	UPI000A2B50B8	-	-	Ensembl	-	-	-	-	-	-
WU_10.2_11_24256265	11:23803178-23803178	A	intron_variant	MODIFIER	ENOX1	ENSSSCG00000021818	Transcript	ENSSSCT00000062725.2	protein_coding	-	10/14	ENSSSCT00000062725.2:c.1804-16722C>A	-	-	-	-	-	-	rs327269504	-	1	-	HGNC	HGNC:25474	-	-	P5	-	ENSSSCP00000054653	-	A0A287BDN7	UPI000A2B02EC	-	-	Ensembl	-	-	-	-	-	-
WU_10.2_11_24256265	11:23803178-23803178	A	intron_variant	MODIFIER	ENOX1	100525605	Transcript	XM_021065347.1	protein_coding	-	10/14	XM_021065347.1:c.1804-16722C>A	-	-	-	-	-	-	rs327269504	-	1	-	EntrezGene	HGNC:25474	-	-	-	-	XP_020921006.1	-	-	-	-	-	RefSeq	-	-	-	-	-	-
WU_10.2_11_24256265	11:23803178-23803178	A	intron_variant	MODIFIER	ENOX1	100525605	Transcript	XM_021065348.1	protein_coding	-	14/18	XM_021065348.1:c.1609-16722C>A	-	-	-	-	-	-	rs327269504	-	1	-	EntrezGene	HGNC:25474	-	-	-	-	XP_020921007.1	-	-	-	-	-	RefSeq	-	-	-	-	-	-
WU_10.2_11_24256265	11:23803178-23803178	A	intron_variant	MODIFIER	ENOX1	100525605	Transcript	XM_021065349.1	protein_coding	-	15/19	XM_021065349.1:c.1609-16722C>A	-	-	-	-	-	-	rs327269504	-	1	-	EntrezGene	HGNC:25474	-	-	-	-	XP_020921008.1	-	-	-	-	-	RefSeq	-	-	-	-	-	-
WU_10.2_11_24256265	11:23803178-23803178	A	intron_variant	MODIFIER	ENOX1	100525605	Transcript	XM_021065350.1	protein_coding	-	14/18	XM_021065350.1:c.1609-16722C>A	-	-	-	-	-	-	rs327269504	-	1	-	EntrezGene	HGNC:25474	-	-	-	-	XP_020921009.1	-	-	-	-	-	RefSeq	-	-	-	-	-	-
WU_10.2_11_24256265	11:23803178-23803178	A	intron_variant	MODIFIER	ENOX1	100525605	Transcript	XM_021065351.1	protein_coding	-	13/17	XM_021065351.1:c.1609-16722C>A	-	-	-	-	-	-	rs327269504	-	1	-	EntrezGene	HGNC:25474	-	-	-	-	XP_020921010.1	-	-	-	-	-	RefSeq	-	-	-	-	-	-
WU_10.2_11_24256265	11:23803178-23803178	A	intron_variant	MODIFIER	ENOX1	100525605	Transcript	XM_021065352.1	protein_coding	-	13/17	XM_021065352.1:c.1609-16722C>A	-	-	-	-	-	-	rs327269504	-	1	-	EntrezGene	HGNC:25474	-	-	-	-	XP_020921011.1	-	-	-	-	-	RefSeq	-	-	-	-	-	-
WU_10.2_11_24256265	11:23803178-23803178	A	intron_variant	MODIFIER	ENOX1	100525605	Transcript	XM_021065353.1	protein_coding	-	13/17	XM_021065353.1:c.1609-16722C>A	-	-	-	-	-	-	rs327269504	-	1	-	EntrezGene	HGNC:25474	-	-	-	-	XP_020921012.1	-	-	-	-	-	RefSeq	-	-	-	-	-	-
WU_10.2_11_24256265	11:23803178-23803178	A	intron_variant	MODIFIER	ENOX1	100525605	Transcript	XM_021065354.1	protein_coding	-	13/17	XM_021065354.1:c.1390-16722C>A	-	-	-	-	-	-	rs327269504	-	1	-	EntrezGene	HGNC:25474	-	-	-	-	XP_020921013.1	-	-	-	-	-	RefSeq	-	-	-	-	-	-
WU_10.2_11_24256265	11:23803178-23803178	A	intron_variant	MODIFIER	ENOX1	100525605	Transcript	XM_021065355.1	protein_coding	-	10/14	XM_021065355.1:c.1390-16722C>A	-	-	-	-	-	-	rs327269504	-	1	-	EntrezGene	HGNC:25474	-	-	-	-	XP_020921014.1	-	-	-	-	-	RefSeq	-	-	-	-	-	-
WU_10.2_11_24256265	11:23803178-23803178	A	intron_variant	MODIFIER	ENOX1	100525605	Transcript	XM_021065356.1	protein_coding	-	13/17	XM_021065356.1:c.1390-16722C>A	-	-	-	-	-	-	rs327269504	-	1	-	EntrezGene	HGNC:25474	-	-	-	-	XP_020921015.1	-	-	-	-	-	RefSeq	-	-	-	-	-	-
WU_10.2_11_24256265	11:23803178-23803178	A	intron_variant	MODIFIER	ENOX1	100525605	Transcript	XM_021065357.1	protein_coding	-	12/16	XM_021065357.1:c.1390-16722C>A	-	-	-	-	-	-	rs327269504	-	1	-	EntrezGene	HGNC:25474	-	-	-	-	XP_020921016.1	-	-	-	-	-	RefSeq	-	-	-	-	-	-
WU_10.2_11_24256265	11:23803178-23803178	A	intron_variant	MODIFIER	ENOX1	100525605	Transcript	XM_021065358.1	protein_coding	-	8/12	XM_021065358.1:c.1201-16722C>A	-	-	-	-	-	-	rs327269504	-	1	-	EntrezGene	HGNC:25474	-	-	-	-	XP_020921017.1	-	-	-	-	-	RefSeq	-	-	-	-	-	-
WU_10.2_11_24256265	11:23803178-23803178	A	intron_variant	MODIFIER	ENOX1	100525605	Transcript	XM_021065359.1	protein_coding	-	8/12	XM_021065359.1:c.1201-16722C>A	-	-	-	-	-	-	rs327269504	-	1	-	EntrezGene	HGNC:25474	-	-	-	-	XP_020921018.1	-	-	-	-	-	RefSeq	-	-	-	-	-	-
WU_10.2_11_24256265	11:23803178-23803178	A	intron_variant	MODIFIER	ENOX1	100525605	Transcript	XM_021065361.1	protein_coding	-	11/15	XM_021065361.1:c.1390-16722C>A	-	-	-	-	-	-	rs327269504	-	1	-	EntrezGene	HGNC:25474	-	-	-	-	XP_020921020.1	-	-	-	-	-	RefSeq	-	-	-	-	-	-
WU_10.2_11_24870075	11:24221060-24221060	G	downstream_gene_variant	MODIFIER	EPSTI1	ENSSSCG00000037572	Transcript	ENSSSCT00000065032.2	protein_coding	-	-	-	-	-	-	-	-	-	rs326689770	4841	1	-	HGNC	HGNC:16465	-	-	P1	-	ENSSSCP00000034513	-	A0A286ZSG6	UPI00022CEAAE	-	-	Ensembl	-	-	-	-	-	-
WU_10.2_11_24870075	11:24221060-24221060	G	downstream_gene_variant	MODIFIER	EPSTI1	100625050	Transcript	XM_003482896.4	protein_coding	-	-	-	-	-	-	-	-	-	rs326689770	4841	1	-	EntrezGene	HGNC:16465	-	-	-	-	XP_003482944.1	-	-	-	-	-	RefSeq	-	-	-	-	-	-
WU_10.2_11_24870075	11:24221060-24221060	G	downstream_gene_variant	MODIFIER	EPSTI1	100625050	Transcript	XM_021065622.1	protein_coding	-	-	-	-	-	-	-	-	-	rs326689770	4841	1	-	EntrezGene	HGNC:16465	-	-	-	-	XP_020921281.1	-	-	-	-	-	RefSeq	-	-	-	-	-	-
ALGA0061896	11:35033384-35033384	G	intergenic_variant	MODIFIER	-	-	-	-	-	-	-	-	-	-	-	-	-	-	rs80807797	-	-	-	-	-	-	-	-	-	-	-	-	-	-	-	-	-	-	-	-	-	-
DRGA0011138	11:37818992-37818992	T	intergenic_variant	MODIFIER	-	-	-	-	-	-	-	-	-	-	-	-	-	-	rs81295067	-	-	-	-	-	-	-	-	-	-	-	-	-	-	-	-	-	-	-	-	-	-
ASGA0050674	11:38534393-38534393	A	intron_variant	MODIFIER	PCDH9	ENSSSCG00000038842	Transcript	ENSSSCT00000010364.3	protein_coding	-	2/2	ENSSSCT00000010364.3:c.3239-9986C>T	-	-	-	-	-	-	rs80824712	-	-1	-	HGNC	HGNC:8661	-	-	A1	-	ENSSSCP00000010094	-	F1RJ39,A0A4X1VER6	UPI000A2B004D	-	-	Ensembl	-	-	-	-	-	-
ASGA0050674	11:38534393-38534393	A	intron_variant	MODIFIER	PCDH9	ENSSSCG00000038842	Transcript	ENSSSCT00000075301.1	protein_coding	-	3/3	ENSSSCT00000075301.1:c.3341-9986C>T	-	-	-	-	-	-	rs80824712	-	-1	-	HGNC	HGNC:8661	-	-	P5	-	ENSSSCP00000074069	-	A0A5G2R9U1,A0A4X1VCZ3	UPI0001E87DBD	-	-	Ensembl	-	-	-	-	-	-
ASGA0050674	11:38534393-38534393	A	intron_variant	MODIFIER	PCDH9	106505308	Transcript	XM_001925503.6	protein_coding	-	3/3	XM_001925503.6:c.3239-9986C>T	-	-	-	-	-	-	rs80824712	-	-1	-	EntrezGene	HGNC:8661	-	-	-	-	XP_001925538.2	-	-	-	-	-	RefSeq	-	-	-	-	-	-
ASGA0050674	11:38534393-38534393	A	intron_variant	MODIFIER	PCDH9	106505308	Transcript	XM_021065362.1	protein_coding	-	4/4	XM_021065362.1:c.3341-9986C>T	-	-	-	-	-	-	rs80824712	-	-1	-	EntrezGene	HGNC:8661	-	-	-	-	XP_020921021.1	-	-	-	-	-	RefSeq	-	-	-	-	-	-
ASGA0050674	11:38534393-38534393	A	intron_variant	MODIFIER	PCDH9	106505308	Transcript	XM_021065363.1	protein_coding	-	4/4	XM_021065363.1:c.3341-9986C>T	-	-	-	-	-	-	rs80824712	-	-1	-	EntrezGene	HGNC:8661	-	-	-	-	XP_020921022.1	-	-	-	-	-	RefSeq	-	-	-	-	-	-
ASGA0050674	11:38534393-38534393	A	intron_variant	MODIFIER	PCDH9	106505308	Transcript	XM_021065364.1	protein_coding	-	4/4	XM_021065364.1:c.3215-9986C>T	-	-	-	-	-	-	rs80824712	-	-1	-	EntrezGene	HGNC:8661	-	-	-	-	XP_020921023.1	-	-	-	-	-	RefSeq	-	-	-	-	-	-
ASGA0050674	11:38534393-38534393	A	intron_variant	MODIFIER	PCDH9	106505308	Transcript	XM_021065365.1	protein_coding	-	3/3	XM_021065365.1:c.3113-9986C>T	-	-	-	-	-	-	rs80824712	-	-1	-	EntrezGene	HGNC:8661	-	-	-	-	XP_020921024.1	-	-	-	-	-	RefSeq	-	-	-	-	-	-
ALGA0062242	11:47494227-47494227	G	intergenic_variant	MODIFIER	-	-	-	-	-	-	-	-	-	-	-	-	-	-	rs81431275	-	-	-	-	-	-	-	-	-	-	-	-	-	-	-	-	-	-	-	-	-	-
WU_10.2_11_52137510	11:47521668-47521668	G	intergenic_variant	MODIFIER	-	-	-	-	-	-	-	-	-	-	-	-	-	-	rs336077106	-	-	-	-	-	-	-	-	-	-	-	-	-	-	-	-	-	-	-	-	-	-
ALGA0062274	11:48361720-48361720	G	intergenic_variant	MODIFIER	-	-	-	-	-	-	-	-	-	-	-	-	-	-	rs81431349	-	-	-	-	-	-	-	-	-	-	-	-	-	-	-	-	-	-	-	-	-	-
WU_10.2_11_56090397	11:51338305-51338305	C	3_prime_UTR_variant	MODIFIER	RBM26	ENSSSCG00000009479	Transcript	ENSSSCT00000050901.2	protein_coding	22/22	-	ENSSSCT00000050901.2:c.*2325A>G	-	5700	-	-	-	-	rs336083182	-	-1	-	HGNC	HGNC:20327	-	-	A2	-	ENSSSCP00000052031	-	A0A287B7F0,A0A4X1V3E9	UPI001147CF7A	-	-	Ensembl	-	-	-	-	-	-
WU_10.2_11_56090397	11:51338305-51338305	C	3_prime_UTR_variant	MODIFIER	RBM26	ENSSSCG00000009479	Transcript	ENSSSCT00000061236.2	protein_coding	21/21	-	ENSSSCT00000061236.2:c.*2325A>G	-	5628	-	-	-	-	rs336083182	-	-1	-	HGNC	HGNC:20327	-	-	A2	-	ENSSSCP00000045171	-	A0A287AME0	UPI001234067A	-	-	Ensembl	-	-	-	-	-	-
WU_10.2_11_56090397	11:51338305-51338305	C	3_prime_UTR_variant	MODIFIER	RBM26	ENSSSCG00000009479	Transcript	ENSSSCT00000064978.2	protein_coding	22/22	-	ENSSSCT00000064978.2:c.*2325A>G	-	5271	-	-	-	-	rs336083182	-	-1	-	HGNC	HGNC:20327	-	-	-	-	ENSSSCP00000035409	-	A0A286ZUX8	UPI001234FCE3	-	-	Ensembl	-	-	-	-	-	-
WU_10.2_11_56090397	11:51338305-51338305	C	downstream_gene_variant	MODIFIER	RBM26	100153235	Transcript	XM_001925971.5	protein_coding	-	-	-	-	-	-	-	-	-	rs336083182	651	-1	-	EntrezGene	HGNC:20327	-	-	-	-	XP_001926006.1	-	-	-	-	-	RefSeq	-	-	-	-	-	-
WU_10.2_11_56090397	11:51338305-51338305	C	downstream_gene_variant	MODIFIER	RBM26	100153235	Transcript	XM_005668487.3	protein_coding	-	-	-	-	-	-	-	-	-	rs336083182	651	-1	-	EntrezGene	HGNC:20327	-	-	-	-	XP_005668544.1	-	-	-	-	-	RefSeq	-	-	-	-	-	-
WU_10.2_11_56090397	11:51338305-51338305	C	downstream_gene_variant	MODIFIER	RBM26	100153235	Transcript	XM_005668491.3	protein_coding	-	-	-	-	-	-	-	-	-	rs336083182	651	-1	-	EntrezGene	HGNC:20327	-	-	-	-	XP_005668548.1	-	-	-	-	-	RefSeq	-	-	-	-	-	-
WU_10.2_11_56090397	11:51338305-51338305	C	downstream_gene_variant	MODIFIER	RBM26	100153235	Transcript	XM_013980595.2	protein_coding	-	-	-	-	-	-	-	-	-	rs336083182	651	-1	-	EntrezGene	HGNC:20327	-	-	-	-	XP_013836049.1	-	-	-	-	-	RefSeq	-	-	-	-	-	-
WU_10.2_11_56090397	11:51338305-51338305	C	downstream_gene_variant	MODIFIER	RBM26	100153235	Transcript	XM_013980596.2	protein_coding	-	-	-	-	-	-	-	-	-	rs336083182	651	-1	-	EntrezGene	HGNC:20327	-	-	-	-	XP_013836050.1	-	-	-	-	-	RefSeq	-	-	-	-	-	-
WU_10.2_11_56090397	11:51338305-51338305	C	downstream_gene_variant	MODIFIER	RBM26	100153235	Transcript	XM_013980597.2	protein_coding	-	-	-	-	-	-	-	-	-	rs336083182	651	-1	-	EntrezGene	HGNC:20327	-	-	-	-	XP_013836051.1	-	-	-	-	-	RefSeq	-	-	-	-	-	-
WU_10.2_11_56090397	11:51338305-51338305	C	downstream_gene_variant	MODIFIER	RBM26	100153235	Transcript	XM_013980598.2	protein_coding	-	-	-	-	-	-	-	-	-	rs336083182	651	-1	-	EntrezGene	HGNC:20327	-	-	-	-	XP_013836052.1	-	-	-	-	-	RefSeq	-	-	-	-	-	-
WU_10.2_11_56090397	11:51338305-51338305	C	downstream_gene_variant	MODIFIER	RBM26	100153235	Transcript	XM_013980599.2	protein_coding	-	-	-	-	-	-	-	-	-	rs336083182	651	-1	-	EntrezGene	HGNC:20327	-	-	-	-	XP_013836053.1	-	-	-	-	-	RefSeq	-	-	-	-	-	-
WU_10.2_11_56090397	11:51338305-51338305	C	downstream_gene_variant	MODIFIER	RBM26	100153235	Transcript	XM_013980600.2	protein_coding	-	-	-	-	-	-	-	-	-	rs336083182	651	-1	-	EntrezGene	HGNC:20327	-	-	-	-	XP_013836054.1	-	-	-	-	-	RefSeq	-	-	-	-	-	-
WU_10.2_11_56090397	11:51338305-51338305	C	downstream_gene_variant	MODIFIER	RBM26	100153235	Transcript	XM_013980606.2	protein_coding	-	-	-	-	-	-	-	-	-	rs336083182	651	-1	-	EntrezGene	HGNC:20327	-	-	-	-	XP_013836060.1	-	-	-	-	-	RefSeq	-	-	-	-	-	-
WU_10.2_11_56090397	11:51338305-51338305	C	downstream_gene_variant	MODIFIER	RBM26	100153235	Transcript	XM_013980607.2	protein_coding	-	-	-	-	-	-	-	-	-	rs336083182	651	-1	-	EntrezGene	HGNC:20327	-	-	-	-	XP_013836061.1	-	-	-	-	-	RefSeq	-	-	-	-	-	-
WU_10.2_11_56090397	11:51338305-51338305	C	3_prime_UTR_variant	MODIFIER	RBM26	100153235	Transcript	XM_013980609.2	protein_coding	22/22	-	XM_013980609.2:c.*2325A>G	-	7032	-	-	-	-	rs336083182	-	-1	-	EntrezGene	HGNC:20327	-	-	-	-	XP_013836063.1	-	-	-	-	-	RefSeq	-	-	-	-	-	-
WU_10.2_11_56090397	11:51338305-51338305	C	3_prime_UTR_variant	MODIFIER	RBM26	100153235	Transcript	XM_013980610.2	protein_coding	22/22	-	XM_013980610.2:c.*2325A>G	-	7029	-	-	-	-	rs336083182	-	-1	-	EntrezGene	HGNC:20327	-	-	-	-	XP_013836064.1	-	-	-	-	-	RefSeq	-	-	-	-	-	-
WU_10.2_11_56090397	11:51338305-51338305	C	downstream_gene_variant	MODIFIER	RBM26	100153235	Transcript	XM_013980611.2	protein_coding	-	-	-	-	-	-	-	-	-	rs336083182	651	-1	-	EntrezGene	HGNC:20327	-	-	-	-	XP_013836065.1	-	-	-	-	-	RefSeq	-	-	-	-	-	-
WU_10.2_11_56090397	11:51338305-51338305	C	downstream_gene_variant	MODIFIER	RBM26	100153235	Transcript	XM_021065770.1	protein_coding	-	-	-	-	-	-	-	-	-	rs336083182	651	-1	-	EntrezGene	HGNC:20327	-	-	-	-	XP_020921429.1	-	-	-	-	-	RefSeq	-	-	-	-	-	-
WU_10.2_11_56090397	11:51338305-51338305	C	downstream_gene_variant	MODIFIER	RBM26	100153235	Transcript	XM_021065771.1	protein_coding	-	-	-	-	-	-	-	-	-	rs336083182	651	-1	-	EntrezGene	HGNC:20327	-	-	-	-	XP_020921430.1	-	-	-	-	-	RefSeq	-	-	-	-	-	-
WU_10.2_11_56090397	11:51338305-51338305	C	downstream_gene_variant	MODIFIER	RBM26	100153235	Transcript	XM_021065772.1	protein_coding	-	-	-	-	-	-	-	-	-	rs336083182	651	-1	-	EntrezGene	HGNC:20327	-	-	-	-	XP_020921431.1	-	-	-	-	-	RefSeq	-	-	-	-	-	-
WU_10.2_11_56090397	11:51338305-51338305	C	3_prime_UTR_variant	MODIFIER	RBM26	100153235	Transcript	XM_021065773.1	protein_coding	22/22	-	XM_021065773.1:c.*2325A>G	-	7013	-	-	-	-	rs336083182	-	-1	-	EntrezGene	HGNC:20327	-	-	-	-	XP_020921432.1	-	-	-	-	-	RefSeq	-	-	-	-	-	-
WU_10.2_11_56090397	11:51338305-51338305	C	downstream_gene_variant	MODIFIER	RBM26	100153235	Transcript	XM_021065774.1	protein_coding	-	-	-	-	-	-	-	-	-	rs336083182	651	-1	-	EntrezGene	HGNC:20327	-	-	-	-	XP_020921433.1	-	-	-	-	-	RefSeq	-	-	-	-	-	-
WU_10.2_11_56090397	11:51338305-51338305	C	downstream_gene_variant	MODIFIER	RBM26	100153235	Transcript	XM_021065776.1	protein_coding	-	-	-	-	-	-	-	-	-	rs336083182	651	-1	-	EntrezGene	HGNC:20327	-	-	-	-	XP_020921435.1	-	-	-	-	-	RefSeq	-	-	-	-	-	-
WU_10.2_11_56090397	11:51338305-51338305	C	downstream_gene_variant	MODIFIER	RBM26	100153235	Transcript	XM_021065777.1	protein_coding	-	-	-	-	-	-	-	-	-	rs336083182	651	-1	-	EntrezGene	HGNC:20327	-	-	-	-	XP_020921436.1	-	-	-	-	-	RefSeq	-	-	-	-	-	-
WU_10.2_11_56090397	11:51338305-51338305	C	downstream_gene_variant	MODIFIER	RBM26	100153235	Transcript	XM_021065779.1	protein_coding	-	-	-	-	-	-	-	-	-	rs336083182	651	-1	-	EntrezGene	HGNC:20327	-	-	-	-	XP_020921438.1	-	-	-	-	-	RefSeq	-	-	-	-	-	-
WU_10.2_11_56090397	11:51338305-51338305	C	downstream_gene_variant	MODIFIER	RBM26	100153235	Transcript	XM_021065780.1	protein_coding	-	-	-	-	-	-	-	-	-	rs336083182	651	-1	-	EntrezGene	HGNC:20327	-	-	-	-	XP_020921439.1	-	-	-	-	-	RefSeq	-	-	-	-	-	-
ALGA0062394	11:51968741-51968741	G	intergenic_variant	MODIFIER	-	-	-	-	-	-	-	-	-	-	-	-	-	-	rs80795606	-	-	-	-	-	-	-	-	-	-	-	-	-	-	-	-	-	-	-	-	-	-
ALGA0062412	11:52306738-52306738	A	intron_variant	MODIFIER	-	ENSSSCG00000050522	Transcript	ENSSSCT00000074396.1	protein_coding	-	5/7	ENSSSCT00000074396.1:c.-1600-4210C>A	-	-	-	-	-	-	rs80880706	-	1	-	-	-	-	-	P1	-	ENSSSCP00000068882	-	A0A5G2R3W5	UPI0012345286	-	-	Ensembl	-	-	-	-	-	-
ALGA0062415	11:52486914-52486914	C	intergenic_variant	MODIFIER	-	-	-	-	-	-	-	-	-	-	-	-	-	-	rs80908509	-	-	-	-	-	-	-	-	-	-	-	-	-	-	-	-	-	-	-	-	-	-
ALGA0062426	11:52807647-52807647	C	intergenic_variant	MODIFIER	-	-	-	-	-	-	-	-	-	-	-	-	-	-	rs80861350	-	-	-	-	-	-	-	-	-	-	-	-	-	-	-	-	-	-	-	-	-	-
ALGA0062438	11:53028924-53028924	G	intergenic_variant	MODIFIER	-	-	-	-	-	-	-	-	-	-	-	-	-	-	rs81431379	-	-	-	-	-	-	-	-	-	-	-	-	-	-	-	-	-	-	-	-	-	-
DRGA0011320	11:53052610-53052610	A	intergenic_variant	MODIFIER	-	-	-	-	-	-	-	-	-	-	-	-	-	-	rs81295123	-	-	-	-	-	-	-	-	-	-	-	-	-	-	-	-	-	-	-	-	-	-
INRA0036652	11:53067025-53067025	G	intergenic_variant	MODIFIER	-	-	-	-	-	-	-	-	-	-	-	-	-	-	rs327353181	-	-	-	-	-	-	-	-	-	-	-	-	-	-	-	-	-	-	-	-	-	-
ASGA0050962	11:53415265-53415265	C	intergenic_variant	MODIFIER	-	-	-	-	-	-	-	-	-	-	-	-	-	-	rs81431386	-	-	-	-	-	-	-	-	-	-	-	-	-	-	-	-	-	-	-	-	-	-
ALGA0062448	11:53461647-53461647	T	intergenic_variant	MODIFIER	-	-	-	-	-	-	-	-	-	-	-	-	-	-	rs81431391	-	-	-	-	-	-	-	-	-	-	-	-	-	-	-	-	-	-	-	-	-	-
DRGA0011335	11:55387465-55387465	T	intergenic_variant	MODIFIER	-	-	-	-	-	-	-	-	-	-	-	-	-	-	rs80945245	-	-	-	-	-	-	-	-	-	-	-	-	-	-	-	-	-	-	-	-	-	-
ALGA0062534	11:56941676-56941676	A	intergenic_variant	MODIFIER	-	-	-	-	-	-	-	-	-	-	-	-	-	-	rs80909075	-	-	-	-	-	-	-	-	-	-	-	-	-	-	-	-	-	-	-	-	-	-
INRA0036775	11:57938408-57938408	T	intron_variant,non_coding_transcript_variant	MODIFIER	-	ENSSSCG00000047789	Transcript	ENSSSCT00000073077.1	lncRNA	-	1/1	ENSSSCT00000073077.1:n.98-1152C>T	-	-	-	-	-	-	rs334201071	-	1	-	-	-	-	-	-	-	-	-	-	-	-	-	Ensembl	-	-	-	-	-	-
INRA0036775	11:57938408-57938408	T	intron_variant,non_coding_transcript_variant	MODIFIER	-	ENSSSCG00000050504	Transcript	ENSSSCT00000084125.1	lncRNA	-	1/3	ENSSSCT00000084125.1:n.154+4372G>A	-	-	-	-	-	-	rs334201071	-	-1	-	-	-	-	-	-	-	-	-	-	-	-	-	Ensembl	-	-	-	-	-	-
WU_10.2_11_64952679	11:59035874-59035874	G	intergenic_variant	MODIFIER	-	-	-	-	-	-	-	-	-	-	-	-	-	-	rs320754863	-	-	-	-	-	-	-	-	-	-	-	-	-	-	-	-	-	-	-	-	-	-
ALGA0062684	11:60230752-60230752	T	intron_variant	MODIFIER	-	ENSSSCG00000043274	Transcript	ENSSSCT00000071116.1	protein_coding	-	3/3	ENSSSCT00000071116.1:c.274-7335G>A	-	-	-	-	-	-	rs80829903	-	-1	-	-	-	-	-	P1	-	ENSSSCP00000065955	-	A0A5G2R5U1	UPI001235184E	-	-	Ensembl	-	-	-	-	-	-
MARC0095559	11:60454966-60454966	A	intergenic_variant	MODIFIER	-	-	-	-	-	-	-	-	-	-	-	-	-	-	rs81273951	-	-	-	-	-	-	-	-	-	-	-	-	-	-	-	-	-	-	-	-	-	-
H3GA0032062	11:60606306-60606306	A	intergenic_variant	MODIFIER	-	-	-	-	-	-	-	-	-	-	-	-	-	-	rs80950141	-	-	-	-	-	-	-	-	-	-	-	-	-	-	-	-	-	-	-	-	-	-
H3GA0032077	11:60861172-60861172	G	intron_variant	MODIFIER	GPC5	ENSSSCG00000031946	Transcript	ENSSSCT00000054202.2	protein_coding	-	2/7	ENSSSCT00000054202.2:c.325+31764A>G	-	-	-	-	-	-	rs80798134	-	1	-	HGNC	HGNC:4453	-	-	P1	-	ENSSSCP00000043997	-	A0A287AJ15	UPI000A2B552C	-	-	Ensembl	-	-	-	-	-	-
H3GA0032077	11:60861172-60861172	G	intron_variant	MODIFIER	GPC5	ENSSSCG00000031946	Transcript	ENSSSCT00000054338.2	protein_coding	-	2/5	ENSSSCT00000054338.2:c.-33+31799A>G	-	-	-	-	-	-	rs80798134	-	1	-	HGNC	HGNC:4453	-	-	-	-	ENSSSCP00000055381	-	A0A287BGW9	UPI00123467BB	-	-	Ensembl	-	-	-	-	-	-
H3GA0032077	11:60861172-60861172	G	intron_variant	MODIFIER	GPC5	100737621	Transcript	XM_021065368.1	protein_coding	-	2/7	XM_021065368.1:c.325+31764A>G	-	-	-	-	-	-	rs80798134	-	1	-	EntrezGene	HGNC:4453	-	-	-	-	XP_020921027.1	-	-	-	-	-	RefSeq	-	-	-	-	-	-
H3GA0032077	11:60861172-60861172	G	intron_variant	MODIFIER	GPC5	100737621	Transcript	XM_021065369.1	protein_coding	-	2/6	XM_021065369.1:c.325+31764A>G	-	-	-	-	-	-	rs80798134	-	1	-	EntrezGene	HGNC:4453	-	-	-	-	XP_020921028.1	-	-	-	-	-	RefSeq	-	-	-	-	-	-
H3GA0032077	11:60861172-60861172	G	intron_variant	MODIFIER	GPC5	100737621	Transcript	XM_021065370.1	protein_coding	-	2/6	XM_021065370.1:c.325+31764A>G	-	-	-	-	-	-	rs80798134	-	1	-	EntrezGene	HGNC:4453	-	-	-	-	XP_020921029.1	-	-	-	-	-	RefSeq	-	-	-	-	-	-
WU_10.2_11_67588757	11:61719209-61719209	A	intron_variant	MODIFIER	GPC5	ENSSSCG00000031946	Transcript	ENSSSCT00000054202.2	protein_coding	-	7/7	ENSSSCT00000054202.2:c.1558+269099G>A	-	-	-	-	-	-	rs329860607	-	1	-	HGNC	HGNC:4453	-	-	P1	-	ENSSSCP00000043997	-	A0A287AJ15	UPI000A2B552C	-	-	Ensembl	-	-	-	-	-	-
WU_10.2_11_67588757	11:61719209-61719209	A	intron_variant	MODIFIER	GPC5	100737621	Transcript	XM_021065368.1	protein_coding	-	7/7	XM_021065368.1:c.1558+269099G>A	-	-	-	-	-	-	rs329860607	-	1	-	EntrezGene	HGNC:4453	-	-	-	-	XP_020921027.1	-	-	-	-	-	RefSeq	-	-	-	-	-	-
WU_10.2_11_67588757	11:61719209-61719209	A	intron_variant	MODIFIER	GPC5	100737621	Transcript	XM_021065370.1	protein_coding	-	6/6	XM_021065370.1:c.*12+269099G>A	-	-	-	-	-	-	rs329860607	-	1	-	EntrezGene	HGNC:4453	-	-	-	-	XP_020921029.1	-	-	-	-	-	RefSeq	-	-	-	-	-	-
ASGA0051242	11:63330751-63330751	T	intron_variant	MODIFIER	GPC6	ENSSSCG00000009489	Transcript	ENSSSCT00000042773.2	protein_coding	-	4/8	ENSSSCT00000042773.2:c.878-111316C>T	-	-	-	-	-	-	rs80939152	-	1	-	HGNC	HGNC:4454	-	-	P1	-	ENSSSCP00000044076	-	A0A480K0L3,A0A4X1V1P1	UPI000A2B27BA	-	-	Ensembl	-	-	-	-	-	-
ASGA0051242	11:63330751-63330751	T	intron_variant	MODIFIER	GPC6	ENSSSCG00000009489	Transcript	ENSSSCT00000058853.2	protein_coding	-	1/6	ENSSSCT00000058853.2:c.34+43523C>T	-	-	-	-	-	-	rs80939152	-	1	-	HGNC	HGNC:4454	-	-	-	-	ENSSSCP00000058087	-	A0A287BPI9	UPI000BAD65CF	-	-	Ensembl	-	-	-	-	-	-
ASGA0051242	11:63330751-63330751	T	intron_variant	MODIFIER	GPC6	102159116	Transcript	XM_021065371.1	protein_coding	-	4/9	XM_021065371.1:c.878-111316C>T	-	-	-	-	-	-	rs80939152	-	1	-	EntrezGene	HGNC:4454	-	-	-	-	XP_020921030.1	-	-	-	-	-	RefSeq	-	-	-	-	-	-
ASGA0051242	11:63330751-63330751	T	intron_variant	MODIFIER	GPC6	102159116	Transcript	XM_021065372.1	protein_coding	-	4/8	XM_021065372.1:c.878-111316C>T	-	-	-	-	-	-	rs80939152	-	1	-	EntrezGene	HGNC:4454	-	-	-	-	XP_020921031.1	-	-	-	-	-	RefSeq	-	-	-	-	-	-
ASGA0051247	11:63427762-63427762	G	intron_variant	MODIFIER	GPC6	ENSSSCG00000009489	Transcript	ENSSSCT00000010404.4	protein_coding	-	1/5	ENSSSCT00000010404.4:c.-5-14305A>G	-	-	-	-	-	-	rs80867763	-	1	-	HGNC	HGNC:4454	-	-	-	-	ENSSSCP00000010134	-	F6PUJ1	UPI000BAD735A	-	-	Ensembl	-	-	-	-	-	-
ASGA0051247	11:63427762-63427762	G	intron_variant	MODIFIER	GPC6	ENSSSCG00000009489	Transcript	ENSSSCT00000042773.2	protein_coding	-	4/8	ENSSSCT00000042773.2:c.878-14305A>G	-	-	-	-	-	-	rs80867763	-	1	-	HGNC	HGNC:4454	-	-	P1	-	ENSSSCP00000044076	-	A0A480K0L3,A0A4X1V1P1	UPI000A2B27BA	-	-	Ensembl	-	-	-	-	-	-
ASGA0051247	11:63427762-63427762	G	intron_variant	MODIFIER	GPC6	ENSSSCG00000009489	Transcript	ENSSSCT00000058853.2	protein_coding	-	1/6	ENSSSCT00000058853.2:c.35-14305A>G	-	-	-	-	-	-	rs80867763	-	1	-	HGNC	HGNC:4454	-	-	-	-	ENSSSCP00000058087	-	A0A287BPI9	UPI000BAD65CF	-	-	Ensembl	-	-	-	-	-	-
ASGA0051247	11:63427762-63427762	G	intron_variant	MODIFIER	GPC6	102159116	Transcript	XM_021065371.1	protein_coding	-	4/9	XM_021065371.1:c.878-14305A>G	-	-	-	-	-	-	rs80867763	-	1	-	EntrezGene	HGNC:4454	-	-	-	-	XP_020921030.1	-	-	-	-	-	RefSeq	-	-	-	-	-	-
ASGA0051247	11:63427762-63427762	G	intron_variant	MODIFIER	GPC6	102159116	Transcript	XM_021065372.1	protein_coding	-	4/8	XM_021065372.1:c.878-14305A>G	-	-	-	-	-	-	rs80867763	-	1	-	EntrezGene	HGNC:4454	-	-	-	-	XP_020921031.1	-	-	-	-	-	RefSeq	-	-	-	-	-	-
ASGA0051274	11:63872778-63872778	C	intergenic_variant	MODIFIER	-	-	-	-	-	-	-	-	-	-	-	-	-	-	rs81431574	-	-	-	-	-	-	-	-	-	-	-	-	-	-	-	-	-	-	-	-	-	-
ASGA0098331	11:63995257-63995257	T	intergenic_variant	MODIFIER	-	-	-	-	-	-	-	-	-	-	-	-	-	-	rs80915356	-	-	-	-	-	-	-	-	-	-	-	-	-	-	-	-	-	-	-	-	-	-
DRGA0017692	11:64135393-64135393	T	intron_variant	MODIFIER	-	ENSSSCG00000026996	Transcript	ENSSSCT00000032528.3	protein_coding	-	22/29	ENSSSCT00000032528.3:c.2708-91G>A	-	-	-	-	-	-	rs323477385	-	-1	-	-	-	-	-	-	-	ENSSSCP00000020566	-	I3L955	UPI000BAD6FBE	-	-	Ensembl	-	-	-	-	-	-
DRGA0017692	11:64135393-64135393	T	intron_variant	MODIFIER	-	ENSSSCG00000026996	Transcript	ENSSSCT00000037963.2	protein_coding	-	22/29	ENSSSCT00000037963.2:c.2807-91G>A	-	-	-	-	-	-	rs323477385	-	-1	-	-	-	-	-	-	-	ENSSSCP00000039455	-	A0A287A6F6	UPI000BAD5EA8	-	-	Ensembl	-	-	-	-	-	-
DRGA0017692	11:64135393-64135393	T	intron_variant	MODIFIER	-	ENSSSCG00000026996	Transcript	ENSSSCT00000052513.2	protein_coding	-	23/30	ENSSSCT00000052513.2:c.2918-91G>A	-	-	-	-	-	-	rs323477385	-	-1	-	-	-	-	-	P1	-	ENSSSCP00000053787	-	A0A287BBR6	UPI000A2B8EE2	-	-	Ensembl	-	-	-	-	-	-
DRGA0017692	11:64135393-64135393	T	intron_variant	MODIFIER	-	ENSSSCG00000026996	Transcript	ENSSSCT00000089696.1	protein_coding	-	22/29	ENSSSCT00000089696.1:c.2777-91G>A	-	-	-	-	-	-	rs323477385	-	-1	-	-	-	-	-	-	-	ENSSSCP00000062182	-	A0A5G2QVH3	UPI001235ECBF	-	-	Ensembl	-	-	-	-	-	-
DRGA0017692	11:64135393-64135393	T	intron_variant	MODIFIER	ABCC4	100152536	Transcript	XM_021065786.1	protein_coding	-	23/30	XM_021065786.1:c.2918-91G>A	-	-	-	-	-	-	rs323477385	-	-1	-	EntrezGene	-	-	-	-	-	XP_020921445.1	-	-	-	-	-	RefSeq	-	-	-	-	-	-
DRGA0017692	11:64135393-64135393	T	intron_variant	MODIFIER	ABCC4	100152536	Transcript	XM_021065787.1	protein_coding	-	20/27	XM_021065787.1:c.2363-91G>A	-	-	-	-	-	-	rs323477385	-	-1	-	EntrezGene	-	-	-	-	-	XP_020921446.1	-	-	-	-	-	RefSeq	-	-	-	-	-	-
ASGA0051412	11:65131413-65131413	A	intron_variant	MODIFIER	CLDN10	ENSSSCG00000009500	Transcript	ENSSSCT00000010417.4	protein_coding	-	3/4	ENSSSCT00000010417.4:c.464+2728G>A	-	-	-	-	-	-	rs80801689	-	1	-	HGNC	HGNC:2033	-	-	P1	-	ENSSSCP00000010146	-	F1RP52,A0A4X1UXL7	UPI00021067BD	-	-	Ensembl	-	-	-	-	-	-
ASGA0051412	11:65131413-65131413	A	intron_variant	MODIFIER	CLDN10	ENSSSCG00000009500	Transcript	ENSSSCT00000047953.2	protein_coding	-	3/4	ENSSSCT00000047953.2:c.458+2728G>A	-	-	-	-	-	-	rs80801689	-	1	-	HGNC	HGNC:2033	-	-	-	-	ENSSSCP00000055010	-	A0A287BG30,A0A4X1UYV1	UPI00021067BE	-	-	Ensembl	-	-	-	-	-	-
ASGA0051412	11:65131413-65131413	A	intron_variant,non_coding_transcript_variant	MODIFIER	-	NM_001243444.1	Transcript	NM_001243444.1	cDNA	-	3/4	NM_001243444.1:n.479+2728G>A	-	-	-	-	-	-	rs80801689	-	1	-	-	-	-	-	-	-	-	-	-	-	-	-	RefSeq	-	-	-	-	-	-
ASGA0051412	11:65131413-65131413	A	intron_variant	MODIFIER	CLDN10	100153752	Transcript	XM_021065094.1	protein_coding	-	3/4	XM_021065094.1:c.458+2728G>A	-	-	-	-	-	-	rs80801689	-	1	-	EntrezGene	HGNC:2033	-	-	-	-	XP_020920753.1	-	-	-	-	-	RefSeq	-	-	-	-	-	-
ASGA0051412	11:65131413-65131413	A	intron_variant	MODIFIER	CLDN10	100153752	Transcript	XM_021065095.1	protein_coding	-	3/4	XM_021065095.1:c.401+2728G>A	-	-	-	-	-	-	rs80801689	-	1	-	EntrezGene	HGNC:2033	-	-	-	-	XP_020920754.1	-	-	-	-	-	RefSeq	-	-	-	-	-	-
ASGA0051420	11:65191189-65191189	C	intron_variant	MODIFIER	-	ENSSSCG00000009501	Transcript	ENSSSCT00000059406.2	protein_coding	-	3/4	ENSSSCT00000059406.2:c.650-463A>G	-	-	-	-	-	-	rs80852086	-	-1	-	-	-	-	-	P1	-	ENSSSCP00000052887	-	A0A287B9X7	UPI001236A190	-	-	Ensembl	-	-	-	-	-	-
ASGA0051420	11:65191189-65191189	C	intron_variant	MODIFIER	DZIP1	100519383	Transcript	XM_021065790.1	protein_coding	-	6/22	XM_021065790.1:c.638-463A>G	-	-	-	-	-	-	rs80852086	-	-1	-	EntrezGene	-	-	-	-	-	XP_020921449.1	-	-	-	-	-	RefSeq	-	-	-	-	-	-
WU_10.2_11_72152642	11:65289958-65289958	G	intron_variant	MODIFIER	DNAJC3	ENSSSCG00000026082	Transcript	ENSSSCT00000026790.3	protein_coding	-	10/13	ENSSSCT00000026790.3:c.1072+3064A>G	-	-	-	-	-	-	rs80887107	-	1	-	EntrezGene	-	-	-	P1	-	ENSSSCP00000021430	-	I3LBK9	UPI000BAD6076	-	-	Ensembl	-	-	-	-	-	-
WU_10.2_11_72152642	11:65289958-65289958	G	intron_variant	MODIFIER	DNAJC3	ENSSSCG00000026082	Transcript	ENSSSCT00000078885.1	protein_coding	-	9/12	ENSSSCT00000078885.1:c.919+3064A>G	-	-	-	-	-	-	rs80887107	-	1	-	EntrezGene	-	-	-	-	-	ENSSSCP00000063645	-	A0A5G2QZH9	UPI001235A4E2	-	-	Ensembl	-	-	-	-	-	-
WU_10.2_11_72152642	11:65289958-65289958	G	intron_variant	MODIFIER	DNAJC3	ENSSSCG00000026082	Transcript	ENSSSCT00000090680.1	protein_coding	-	10/13	ENSSSCT00000090680.1:c.1015+3064A>G	-	-	-	-	-	-	rs80887107	-	1	-	EntrezGene	-	-	-	-	-	ENSSSCP00000068927	-	A0A5G2QXQ7	UPI001236B1AD	-	-	Ensembl	-	-	-	-	-	-
WU_10.2_11_72152642	11:65289958-65289958	G	intron_variant,non_coding_transcript_variant	MODIFIER	-	NM_001190184.1	Transcript	NM_001190184.1	cDNA	-	9/11	NM_001190184.1:n.1174+3064A>G	-	-	-	-	-	-	rs80887107	-	1	-	-	-	-	-	-	-	-	-	-	-	-	-	RefSeq	-	-	-	-	-	-
ALGA0063183	11:65303929-65303929	G	downstream_gene_variant	MODIFIER	UGGT2	ENSSSCG00000009502	Transcript	ENSSSCT00000010419.4	protein_coding	-	-	-	-	-	-	-	-	-	rs80857173	3234	-1	-	HGNC	HGNC:15664	-	-	P5	-	ENSSSCP00000010148	-	F1RP50	UPI000A2B1CE9	-	-	Ensembl	-	-	-	-	-	-
ALGA0063183	11:65303929-65303929	G	downstream_gene_variant	MODIFIER	DNAJC3	ENSSSCG00000026082	Transcript	ENSSSCT00000026790.3	protein_coding	-	-	-	-	-	-	-	-	-	rs80857173	85	1	-	EntrezGene	-	-	-	P1	-	ENSSSCP00000021430	-	I3LBK9	UPI000BAD6076	-	-	Ensembl	-	-	-	-	-	-
ALGA0063183	11:65303929-65303929	G	downstream_gene_variant	MODIFIER	UGGT2	ENSSSCG00000009502	Transcript	ENSSSCT00000077595.1	protein_coding	-	-	-	-	-	-	-	-	-	rs80857173	3221	-1	-	HGNC	HGNC:15664	-	-	-	-	ENSSSCP00000062266	-	A0A5G2QCG3	UPI001235C522	-	-	Ensembl	-	-	-	-	-	-
ALGA0063183	11:65303929-65303929	G	downstream_gene_variant	MODIFIER	DNAJC3	ENSSSCG00000026082	Transcript	ENSSSCT00000078885.1	protein_coding	-	-	-	-	-	-	-	-	-	rs80857173	85	1	-	EntrezGene	-	-	-	-	-	ENSSSCP00000063645	-	A0A5G2QZH9	UPI001235A4E2	-	-	Ensembl	-	-	-	-	-	-
ALGA0063183	11:65303929-65303929	G	downstream_gene_variant	MODIFIER	UGGT2	ENSSSCG00000009502	Transcript	ENSSSCT00000083393.1	protein_coding	-	-	-	-	-	-	-	-	-	rs80857173	3288	-1	-	HGNC	HGNC:15664	-	-	A2	-	ENSSSCP00000059930	-	A0A5G2QD09	UPI0012340603	-	-	Ensembl	-	-	-	-	-	-
ALGA0063183	11:65303929-65303929	G	downstream_gene_variant	MODIFIER	DNAJC3	ENSSSCG00000026082	Transcript	ENSSSCT00000090680.1	protein_coding	-	-	-	-	-	-	-	-	-	rs80857173	85	1	-	EntrezGene	-	-	-	-	-	ENSSSCP00000068927	-	A0A5G2QXQ7	UPI001236B1AD	-	-	Ensembl	-	-	-	-	-	-
ALGA0063183	11:65303929-65303929	G	downstream_gene_variant	MODIFIER	-	NM_001190184.1	Transcript	NM_001190184.1	cDNA	-	-	-	-	-	-	-	-	-	rs80857173	4847	1	-	-	-	-	-	-	-	-	-	-	-	-	-	RefSeq	-	-	-	-	-	-
ALGA0063183	11:65303929-65303929	G	downstream_gene_variant	MODIFIER	UGGT2	100154594	Transcript	XM_021065791.1	protein_coding	-	-	-	-	-	-	-	-	-	rs80857173	3279	-1	-	EntrezGene	HGNC:15664	-	-	-	-	XP_020921450.1	-	-	-	-	-	RefSeq	-	-	-	-	-	-
ALGA0063183	11:65303929-65303929	G	downstream_gene_variant	MODIFIER	UGGT2	100154594	Transcript	XM_021065792.1	protein_coding	-	-	-	-	-	-	-	-	-	rs80857173	3279	-1	-	EntrezGene	HGNC:15664	-	-	-	-	XP_020921451.1	-	-	-	-	-	RefSeq	-	-	-	-	-	-
ALGA0063183	11:65303929-65303929	G	downstream_gene_variant	MODIFIER	UGGT2	100154594	Transcript	XM_021065793.1	protein_coding	-	-	-	-	-	-	-	-	-	rs80857173	3279	-1	-	EntrezGene	HGNC:15664	-	-	-	-	XP_020921452.1	-	-	-	-	-	RefSeq	-	-	-	-	-	-
WU_10.2_11_72209198	11:65320621-65320621	A	intron_variant	MODIFIER	UGGT2	ENSSSCG00000009502	Transcript	ENSSSCT00000010419.4	protein_coding	-	36/38	ENSSSCT00000010419.4:c.4597-271C>T	-	-	-	-	-	-	rs332849607	-	-1	-	HGNC	HGNC:15664	-	-	P5	-	ENSSSCP00000010148	-	F1RP50	UPI000A2B1CE9	-	-	Ensembl	-	-	-	-	-	-
WU_10.2_11_72209198	11:65320621-65320621	A	intron_variant	MODIFIER	UGGT2	ENSSSCG00000009502	Transcript	ENSSSCT00000077595.1	protein_coding	-	37/39	ENSSSCT00000077595.1:c.*4778-271C>T	-	-	-	-	-	-	rs332849607	-	-1	-	HGNC	HGNC:15664	-	-	-	-	ENSSSCP00000062266	-	A0A5G2QCG3	UPI001235C522	-	-	Ensembl	-	-	-	-	-	-
WU_10.2_11_72209198	11:65320621-65320621	A	intron_variant	MODIFIER	UGGT2	ENSSSCG00000009502	Transcript	ENSSSCT00000083393.1	protein_coding	-	36/38	ENSSSCT00000083393.1:c.4090-271C>T	-	-	-	-	-	-	rs332849607	-	-1	-	HGNC	HGNC:15664	-	-	A2	-	ENSSSCP00000059930	-	A0A5G2QD09	UPI0012340603	-	-	Ensembl	-	-	-	-	-	-
WU_10.2_11_72209198	11:65320621-65320621	A	intron_variant	MODIFIER	UGGT2	ENSSSCG00000009502	Transcript	ENSSSCT00000088862.1	protein_coding	-	38/39	ENSSSCT00000088862.1:c.-15-271C>T	-	-	-	-	-	-	rs332849607	-	-1	-	HGNC	HGNC:15664	-	-	-	-	ENSSSCP00000060848	-	A0A5G2Q988	UPI001237002D	-	-	Ensembl	-	-	-	-	-	-
WU_10.2_11_72209198	11:65320621-65320621	A	intron_variant	MODIFIER	UGGT2	ENSSSCG00000009502	Transcript	ENSSSCT00000089629.1	protein_coding	-	36/37	ENSSSCT00000089629.1:c.4270-271C>T	-	-	-	-	-	-	rs332849607	-	-1	-	HGNC	HGNC:15664	-	-	A2	-	ENSSSCP00000062674	-	A0A5G2QEQ4	UPI0012359F0F	-	-	Ensembl	-	-	-	-	-	-
WU_10.2_11_72209198	11:65320621-65320621	A	intron_variant	MODIFIER	UGGT2	100154594	Transcript	XM_021065791.1	protein_coding	-	37/39	XM_021065791.1:c.4726-271C>T	-	-	-	-	-	-	rs332849607	-	-1	-	EntrezGene	HGNC:15664	-	-	-	-	XP_020921450.1	-	-	-	-	-	RefSeq	-	-	-	-	-	-
WU_10.2_11_72209198	11:65320621-65320621	A	intron_variant	MODIFIER	UGGT2	100154594	Transcript	XM_021065792.1	protein_coding	-	36/38	XM_021065792.1:c.4597-271C>T	-	-	-	-	-	-	rs332849607	-	-1	-	EntrezGene	HGNC:15664	-	-	-	-	XP_020921451.1	-	-	-	-	-	RefSeq	-	-	-	-	-	-
WU_10.2_11_72209198	11:65320621-65320621	A	intron_variant	MODIFIER	UGGT2	100154594	Transcript	XM_021065793.1	protein_coding	-	36/38	XM_021065793.1:c.4234-271C>T	-	-	-	-	-	-	rs332849607	-	-1	-	EntrezGene	HGNC:15664	-	-	-	-	XP_020921452.1	-	-	-	-	-	RefSeq	-	-	-	-	-	-
ALGA0103037	11:65356021-65356021	C	synonymous_variant	LOW	UGGT2	ENSSSCG00000009502	Transcript	ENSSSCT00000010419.4	protein_coding	27/39	-	ENSSSCT00000010419.4:c.3414A>G	ENSSSCP00000010148.3:p.Gly1138%3D	4128	3414	1138	G	ggA/ggG	rs81477813	-	-1	-	HGNC	HGNC:15664	-	-	P5	-	ENSSSCP00000010148	-	F1RP50	UPI000A2B1CE9	-	-	Ensembl	-	-	-	-	-	-
ALGA0103037	11:65356021-65356021	C	3_prime_UTR_variant	MODIFIER	UGGT2	ENSSSCG00000009502	Transcript	ENSSSCT00000077595.1	protein_coding	28/40	-	ENSSSCT00000077595.1:c.*3595A>G	-	4515	-	-	-	-	rs81477813	-	-1	-	HGNC	HGNC:15664	-	-	-	-	ENSSSCP00000062266	-	A0A5G2QCG3	UPI001235C522	-	-	Ensembl	-	-	-	-	-	-
ALGA0103037	11:65356021-65356021	C	synonymous_variant	LOW	UGGT2	ENSSSCG00000009502	Transcript	ENSSSCT00000083393.1	protein_coding	27/39	-	ENSSSCT00000083393.1:c.2907A>G	ENSSSCP00000059930.1:p.Gly969%3D	4150	2907	969	G	ggA/ggG	rs81477813	-	-1	-	HGNC	HGNC:15664	-	-	A2	-	ENSSSCP00000059930	-	A0A5G2QD09	UPI0012340603	-	-	Ensembl	-	-	-	-	-	-
ALGA0103037	11:65356021-65356021	C	5_prime_UTR_variant	MODIFIER	UGGT2	ENSSSCG00000009502	Transcript	ENSSSCT00000088862.1	protein_coding	29/40	-	ENSSSCT00000088862.1:c.-1143A>G	-	3394	-	-	-	-	rs81477813	-	-1	-	HGNC	HGNC:15664	-	-	-	-	ENSSSCP00000060848	-	A0A5G2Q988	UPI001237002D	-	-	Ensembl	-	-	-	-	-	-
ALGA0103037	11:65356021-65356021	C	synonymous_variant	LOW	UGGT2	ENSSSCG00000009502	Transcript	ENSSSCT00000089629.1	protein_coding	27/38	-	ENSSSCT00000089629.1:c.3087A>G	ENSSSCP00000062674.1:p.Gly1029%3D	3182	3087	1029	G	ggA/ggG	rs81477813	-	-1	-	HGNC	HGNC:15664	-	-	A2	-	ENSSSCP00000062674	-	A0A5G2QEQ4	UPI0012359F0F	-	-	Ensembl	-	-	-	-	-	-
ALGA0103037	11:65356021-65356021	C	synonymous_variant	LOW	UGGT2	100154594	Transcript	XM_021065791.1	protein_coding	28/40	-	XM_021065791.1:c.3543A>G	XP_020921450.1:p.Gly1181%3D	3558	3543	1181	G	ggA/ggG	rs81477813	-	-1	-	EntrezGene	HGNC:15664	-	-	-	-	XP_020921450.1	-	-	-	-	-	RefSeq	-	-	-	-	-	-
ALGA0103037	11:65356021-65356021	C	synonymous_variant	LOW	UGGT2	100154594	Transcript	XM_021065792.1	protein_coding	27/39	-	XM_021065792.1:c.3414A>G	XP_020921451.1:p.Gly1138%3D	3429	3414	1138	G	ggA/ggG	rs81477813	-	-1	-	EntrezGene	HGNC:15664	-	-	-	-	XP_020921451.1	-	-	-	-	-	RefSeq	-	-	-	-	-	-
ALGA0103037	11:65356021-65356021	C	synonymous_variant	LOW	UGGT2	100154594	Transcript	XM_021065793.1	protein_coding	27/39	-	XM_021065793.1:c.3051A>G	XP_020921452.1:p.Gly1017%3D	3069	3051	1017	G	ggA/ggG	rs81477813	-	-1	-	EntrezGene	HGNC:15664	-	-	-	-	XP_020921452.1	-	-	-	-	-	RefSeq	-	-	-	-	-	-
WU_10.2_11_72307560	11:65377465-65377465	T	intron_variant	MODIFIER	UGGT2	ENSSSCG00000009502	Transcript	ENSSSCT00000010419.4	protein_coding	-	22/38	ENSSSCT00000010419.4:c.2952+2373G>A	-	-	-	-	-	-	rs323762221	-	-1	-	HGNC	HGNC:15664	-	-	P5	-	ENSSSCP00000010148	-	F1RP50	UPI000A2B1CE9	-	-	Ensembl	-	-	-	-	-	-
WU_10.2_11_72307560	11:65377465-65377465	T	intron_variant	MODIFIER	UGGT2	ENSSSCG00000009502	Transcript	ENSSSCT00000077595.1	protein_coding	-	22/39	ENSSSCT00000077595.1:c.*1803+2373G>A	-	-	-	-	-	-	rs323762221	-	-1	-	HGNC	HGNC:15664	-	-	-	-	ENSSSCP00000062266	-	A0A5G2QCG3	UPI001235C522	-	-	Ensembl	-	-	-	-	-	-
WU_10.2_11_72307560	11:65377465-65377465	T	intron_variant	MODIFIER	UGGT2	ENSSSCG00000009502	Transcript	ENSSSCT00000083393.1	protein_coding	-	22/38	ENSSSCT00000083393.1:c.2445+2373G>A	-	-	-	-	-	-	rs323762221	-	-1	-	HGNC	HGNC:15664	-	-	A2	-	ENSSSCP00000059930	-	A0A5G2QD09	UPI0012340603	-	-	Ensembl	-	-	-	-	-	-
WU_10.2_11_72307560	11:65377465-65377465	T	intron_variant	MODIFIER	UGGT2	ENSSSCG00000009502	Transcript	ENSSSCT00000088862.1	protein_coding	-	24/39	ENSSSCT00000088862.1:c.-1605+2373G>A	-	-	-	-	-	-	rs323762221	-	-1	-	HGNC	HGNC:15664	-	-	-	-	ENSSSCP00000060848	-	A0A5G2Q988	UPI001237002D	-	-	Ensembl	-	-	-	-	-	-
WU_10.2_11_72307560	11:65377465-65377465	T	intron_variant	MODIFIER	UGGT2	ENSSSCG00000009502	Transcript	ENSSSCT00000089629.1	protein_coding	-	22/37	ENSSSCT00000089629.1:c.2625+2373G>A	-	-	-	-	-	-	rs323762221	-	-1	-	HGNC	HGNC:15664	-	-	A2	-	ENSSSCP00000062674	-	A0A5G2QEQ4	UPI0012359F0F	-	-	Ensembl	-	-	-	-	-	-
WU_10.2_11_72307560	11:65377465-65377465	T	intron_variant	MODIFIER	UGGT2	100154594	Transcript	XM_021065791.1	protein_coding	-	23/39	XM_021065791.1:c.3081+2373G>A	-	-	-	-	-	-	rs323762221	-	-1	-	EntrezGene	HGNC:15664	-	-	-	-	XP_020921450.1	-	-	-	-	-	RefSeq	-	-	-	-	-	-
WU_10.2_11_72307560	11:65377465-65377465	T	intron_variant	MODIFIER	UGGT2	100154594	Transcript	XM_021065792.1	protein_coding	-	22/38	XM_021065792.1:c.2952+2373G>A	-	-	-	-	-	-	rs323762221	-	-1	-	EntrezGene	HGNC:15664	-	-	-	-	XP_020921451.1	-	-	-	-	-	RefSeq	-	-	-	-	-	-
WU_10.2_11_72307560	11:65377465-65377465	T	intron_variant	MODIFIER	UGGT2	100154594	Transcript	XM_021065793.1	protein_coding	-	22/38	XM_021065793.1:c.2589+2373G>A	-	-	-	-	-	-	rs323762221	-	-1	-	EntrezGene	HGNC:15664	-	-	-	-	XP_020921452.1	-	-	-	-	-	RefSeq	-	-	-	-	-	-
ALGA0063203	11:65411074-65411074	C	intron_variant	MODIFIER	UGGT2	ENSSSCG00000009502	Transcript	ENSSSCT00000010419.4	protein_coding	-	12/38	ENSSSCT00000010419.4:c.1657-2236T>G	-	-	-	-	-	-	rs80844398	-	-1	-	HGNC	HGNC:15664	-	-	P5	-	ENSSSCP00000010148	-	F1RP50	UPI000A2B1CE9	-	-	Ensembl	-	-	-	-	-	-
ALGA0063203	11:65411074-65411074	C	intron_variant	MODIFIER	UGGT2	ENSSSCG00000009502	Transcript	ENSSSCT00000077595.1	protein_coding	-	12/39	ENSSSCT00000077595.1:c.*508-2236T>G	-	-	-	-	-	-	rs80844398	-	-1	-	HGNC	HGNC:15664	-	-	-	-	ENSSSCP00000062266	-	A0A5G2QCG3	UPI001235C522	-	-	Ensembl	-	-	-	-	-	-
ALGA0063203	11:65411074-65411074	C	intron_variant	MODIFIER	UGGT2	ENSSSCG00000009502	Transcript	ENSSSCT00000083393.1	protein_coding	-	12/38	ENSSSCT00000083393.1:c.1150-2236T>G	-	-	-	-	-	-	rs80844398	-	-1	-	HGNC	HGNC:15664	-	-	A2	-	ENSSSCP00000059930	-	A0A5G2QD09	UPI0012340603	-	-	Ensembl	-	-	-	-	-	-
ALGA0063203	11:65411074-65411074	C	intron_variant	MODIFIER	UGGT2	ENSSSCG00000009502	Transcript	ENSSSCT00000088862.1	protein_coding	-	14/39	ENSSSCT00000088862.1:c.-2900-2236T>G	-	-	-	-	-	-	rs80844398	-	-1	-	HGNC	HGNC:15664	-	-	-	-	ENSSSCP00000060848	-	A0A5G2Q988	UPI001237002D	-	-	Ensembl	-	-	-	-	-	-
ALGA0063203	11:65411074-65411074	C	intron_variant	MODIFIER	UGGT2	ENSSSCG00000009502	Transcript	ENSSSCT00000089629.1	protein_coding	-	12/37	ENSSSCT00000089629.1:c.1330-2236T>G	-	-	-	-	-	-	rs80844398	-	-1	-	HGNC	HGNC:15664	-	-	A2	-	ENSSSCP00000062674	-	A0A5G2QEQ4	UPI0012359F0F	-	-	Ensembl	-	-	-	-	-	-
ALGA0063203	11:65411074-65411074	C	intron_variant	MODIFIER	UGGT2	100154594	Transcript	XM_021065791.1	protein_coding	-	12/39	XM_021065791.1:c.1657-2236T>G	-	-	-	-	-	-	rs80844398	-	-1	-	EntrezGene	HGNC:15664	-	-	-	-	XP_020921450.1	-	-	-	-	-	RefSeq	-	-	-	-	-	-
ALGA0063203	11:65411074-65411074	C	intron_variant	MODIFIER	UGGT2	100154594	Transcript	XM_021065792.1	protein_coding	-	12/38	XM_021065792.1:c.1657-2236T>G	-	-	-	-	-	-	rs80844398	-	-1	-	EntrezGene	HGNC:15664	-	-	-	-	XP_020921451.1	-	-	-	-	-	RefSeq	-	-	-	-	-	-
ALGA0063203	11:65411074-65411074	C	intron_variant	MODIFIER	UGGT2	100154594	Transcript	XM_021065793.1	protein_coding	-	11/38	XM_021065793.1:c.1165-2236T>G	-	-	-	-	-	-	rs80844398	-	-1	-	EntrezGene	HGNC:15664	-	-	-	-	XP_020921452.1	-	-	-	-	-	RefSeq	-	-	-	-	-	-
ALGA0063246	11:65576440-65576440	T	intron_variant	MODIFIER	HS6ST3	ENSSSCG00000009503	Transcript	ENSSSCT00000010420.3	protein_coding	-	1/1	ENSSSCT00000010420.3:c.710+59435C>T	-	-	-	-	-	-	rs80900851	-	1	-	HGNC	HGNC:19134	-	-	P1	-	ENSSSCP00000010149	-	F1RP49,A0A4X1UWI3	UPI000A2B2F1E	-	-	Ensembl	-	-	-	-	-	-
ALGA0063246	11:65576440-65576440	T	upstream_gene_variant	MODIFIER	-	ENSSSCG00000046824	Transcript	ENSSSCT00000075138.1	pseudogene	-	-	-	-	-	-	-	-	-	rs80900851	2391	-1	-	-	-	-	-	-	-	-	-	-	-	-	-	Ensembl	-	-	-	-	-	-
ALGA0063246	11:65576440-65576440	T	intron_variant	MODIFIER	HS6ST3	100620744	Transcript	XM_021065373.1	protein_coding	-	1/1	XM_021065373.1:c.710+59435C>T	-	-	-	-	-	-	rs80900851	-	1	-	EntrezGene	HGNC:19134	-	-	-	-	XP_020921032.1	-	-	-	-	-	RefSeq	-	-	-	-	-	-
ALGA0063246	11:65576440-65576440	T	intron_variant,non_coding_transcript_variant	MODIFIER	HS6ST3	100620744	Transcript	XR_002336563.1	misc_RNA	-	1/2	XR_002336563.1:n.826+59435C>T	-	-	-	-	-	-	rs80900851	-	1	-	EntrezGene	HGNC:19134	-	-	-	-	-	-	-	-	-	-	RefSeq	-	-	-	-	-	-
ALGA0063246	11:65576440-65576440	T	intron_variant,non_coding_transcript_variant	MODIFIER	HS6ST3	100620744	Transcript	XR_002336564.1	misc_RNA	-	1/2	XR_002336564.1:n.826+59435C>T	-	-	-	-	-	-	rs80900851	-	1	-	EntrezGene	HGNC:19134	-	-	-	-	-	-	-	-	-	-	RefSeq	-	-	-	-	-	-
ALGA0063246	11:65576440-65576440	T	intron_variant,non_coding_transcript_variant	MODIFIER	HS6ST3	100620744	Transcript	XR_002336565.1	misc_RNA	-	1/3	XR_002336565.1:n.826+59435C>T	-	-	-	-	-	-	rs80900851	-	1	-	EntrezGene	HGNC:19134	-	-	-	-	-	-	-	-	-	-	RefSeq	-	-	-	-	-	-
ALGA0063246	11:65576440-65576440	T	intron_variant,non_coding_transcript_variant	MODIFIER	HS6ST3	100620744	Transcript	XR_002336566.1	misc_RNA	-	1/2	XR_002336566.1:n.826+59435C>T	-	-	-	-	-	-	rs80900851	-	1	-	EntrezGene	HGNC:19134	-	-	-	-	-	-	-	-	-	-	RefSeq	-	-	-	-	-	-
ALGA0063246	11:65576440-65576440	T	intron_variant,non_coding_transcript_variant	MODIFIER	HS6ST3	100620744	Transcript	XR_002336567.1	misc_RNA	-	1/3	XR_002336567.1:n.826+59435C>T	-	-	-	-	-	-	rs80900851	-	1	-	EntrezGene	HGNC:19134	-	-	-	-	-	-	-	-	-	-	RefSeq	-	-	-	-	-	-
ALGA0063246	11:65576440-65576440	T	intron_variant,non_coding_transcript_variant	MODIFIER	HS6ST3	100620744	Transcript	XR_002336568.1	misc_RNA	-	1/2	XR_002336568.1:n.826+59435C>T	-	-	-	-	-	-	rs80900851	-	1	-	EntrezGene	HGNC:19134	-	-	-	-	-	-	-	-	-	-	RefSeq	-	-	-	-	-	-
ALGA0063219	11:65616972-65616972	G	intron_variant	MODIFIER	HS6ST3	ENSSSCG00000009503	Transcript	ENSSSCT00000010420.3	protein_coding	-	1/1	ENSSSCT00000010420.3:c.710+99967A>G	-	-	-	-	-	-	rs80937759	-	1	-	HGNC	HGNC:19134	-	-	P1	-	ENSSSCP00000010149	-	F1RP49,A0A4X1UWI3	UPI000A2B2F1E	-	-	Ensembl	-	-	-	-	-	-
ALGA0063219	11:65616972-65616972	G	intron_variant	MODIFIER	HS6ST3	100620744	Transcript	XM_021065373.1	protein_coding	-	1/1	XM_021065373.1:c.710+99967A>G	-	-	-	-	-	-	rs80937759	-	1	-	EntrezGene	HGNC:19134	-	-	-	-	XP_020921032.1	-	-	-	-	-	RefSeq	-	-	-	-	-	-
ALGA0063219	11:65616972-65616972	G	intron_variant,non_coding_transcript_variant	MODIFIER	HS6ST3	100620744	Transcript	XR_002336563.1	misc_RNA	-	1/2	XR_002336563.1:n.826+99967A>G	-	-	-	-	-	-	rs80937759	-	1	-	EntrezGene	HGNC:19134	-	-	-	-	-	-	-	-	-	-	RefSeq	-	-	-	-	-	-
ALGA0063219	11:65616972-65616972	G	intron_variant,non_coding_transcript_variant	MODIFIER	HS6ST3	100620744	Transcript	XR_002336564.1	misc_RNA	-	1/2	XR_002336564.1:n.826+99967A>G	-	-	-	-	-	-	rs80937759	-	1	-	EntrezGene	HGNC:19134	-	-	-	-	-	-	-	-	-	-	RefSeq	-	-	-	-	-	-
ALGA0063219	11:65616972-65616972	G	intron_variant,non_coding_transcript_variant	MODIFIER	HS6ST3	100620744	Transcript	XR_002336565.1	misc_RNA	-	1/3	XR_002336565.1:n.826+99967A>G	-	-	-	-	-	-	rs80937759	-	1	-	EntrezGene	HGNC:19134	-	-	-	-	-	-	-	-	-	-	RefSeq	-	-	-	-	-	-
ALGA0063219	11:65616972-65616972	G	intron_variant,non_coding_transcript_variant	MODIFIER	HS6ST3	100620744	Transcript	XR_002336566.1	misc_RNA	-	1/2	XR_002336566.1:n.826+99967A>G	-	-	-	-	-	-	rs80937759	-	1	-	EntrezGene	HGNC:19134	-	-	-	-	-	-	-	-	-	-	RefSeq	-	-	-	-	-	-
ALGA0063219	11:65616972-65616972	G	intron_variant,non_coding_transcript_variant	MODIFIER	HS6ST3	100620744	Transcript	XR_002336567.1	misc_RNA	-	1/3	XR_002336567.1:n.826+99967A>G	-	-	-	-	-	-	rs80937759	-	1	-	EntrezGene	HGNC:19134	-	-	-	-	-	-	-	-	-	-	RefSeq	-	-	-	-	-	-
ALGA0063219	11:65616972-65616972	G	intron_variant,non_coding_transcript_variant	MODIFIER	HS6ST3	100620744	Transcript	XR_002336568.1	misc_RNA	-	1/2	XR_002336568.1:n.826+99967A>G	-	-	-	-	-	-	rs80937759	-	1	-	EntrezGene	HGNC:19134	-	-	-	-	-	-	-	-	-	-	RefSeq	-	-	-	-	-	-
WU_10.2_11_74879169	11:67642199-67642199	G	intergenic_variant	MODIFIER	-	-	-	-	-	-	-	-	-	-	-	-	-	-	rs337396157	-	-	-	-	-	-	-	-	-	-	-	-	-	-	-	-	-	-	-	-	-	-
ASGA0051626	11:67775582-67775582	C	intron_variant	MODIFIER	DOCK9	ENSSSCG00000022112	Transcript	ENSSSCT00000027258.3	protein_coding	-	50/53	ENSSSCT00000027258.3:c.5674+1264T>G	-	-	-	-	-	-	rs80962112	-	-1	-	HGNC	HGNC:14132	-	-	A2	-	ENSSSCP00000027581	-	I3LTY2	UPI000BAD86E1	-	-	Ensembl	-	-	-	-	-	-
ASGA0051626	11:67775582-67775582	C	intron_variant	MODIFIER	DOCK9	ENSSSCG00000022112	Transcript	ENSSSCT00000042343.2	protein_coding	-	50/53	ENSSSCT00000042343.2:c.5803+1264T>G	-	-	-	-	-	-	rs80962112	-	-1	-	HGNC	HGNC:14132	-	-	A2	-	ENSSSCP00000046406	-	A0A287AR72	UPI000BADA0CF	-	-	Ensembl	-	-	-	-	-	-
ASGA0051626	11:67775582-67775582	C	intron_variant	MODIFIER	DOCK9	ENSSSCG00000022112	Transcript	ENSSSCT00000048894.2	protein_coding	-	50/53	ENSSSCT00000048894.2:c.5710+1264T>G	-	-	-	-	-	-	rs80962112	-	-1	-	HGNC	HGNC:14132	-	-	A2	-	ENSSSCP00000039278	-	A0A287A686	UPI00123622D1	-	-	Ensembl	-	-	-	-	-	-
ASGA0051626	11:67775582-67775582	C	intron_variant	MODIFIER	DOCK9	ENSSSCG00000022112	Transcript	ENSSSCT00000057898.2	protein_coding	-	52/56	ENSSSCT00000057898.2:c.5776+1264T>G	-	-	-	-	-	-	rs80962112	-	-1	-	HGNC	HGNC:14132	-	-	A2	-	ENSSSCP00000049181	-	A0A287AZ64	UPI0012362B5C	-	-	Ensembl	-	-	-	-	-	-
ASGA0051626	11:67775582-67775582	C	intron_variant	MODIFIER	DOCK9	ENSSSCG00000022112	Transcript	ENSSSCT00000060404.2	protein_coding	-	50/53	ENSSSCT00000060404.2:c.6319+1264T>G	-	-	-	-	-	-	rs80962112	-	-1	-	HGNC	HGNC:14132	-	-	P5	-	ENSSSCP00000048075	-	A0A287AVY9	UPI000BAD9574	-	-	Ensembl	-	-	-	-	-	-
ASGA0051626	11:67775582-67775582	C	intron_variant	MODIFIER	DOCK9	ENSSSCG00000022112	Transcript	ENSSSCT00000060708.2	protein_coding	-	49/52	ENSSSCT00000060708.2:c.5692+1264T>G	-	-	-	-	-	-	rs80962112	-	-1	-	HGNC	HGNC:14132	-	-	A2	-	ENSSSCP00000058090	-	A0A287BN98	UPI000A2B84E2	-	-	Ensembl	-	-	-	-	-	-
ASGA0051626	11:67775582-67775582	C	intron_variant	MODIFIER	DOCK9	ENSSSCG00000022112	Transcript	ENSSSCT00000064935.2	protein_coding	-	48/51	ENSSSCT00000064935.2:c.5428+1264T>G	-	-	-	-	-	-	rs80962112	-	-1	-	HGNC	HGNC:14132	-	-	A2	-	ENSSSCP00000039206	-	A0A287A5R6	UPI0012359B46	-	-	Ensembl	-	-	-	-	-	-
ASGA0051626	11:67775582-67775582	C	intron_variant	MODIFIER	DOCK9	ENSSSCG00000022112	Transcript	ENSSSCT00000065095.2	protein_coding	-	52/55	ENSSSCT00000065095.2:c.5443+1264T>G	-	-	-	-	-	-	rs80962112	-	-1	-	HGNC	HGNC:14132	-	-	A2	-	ENSSSCP00000048478	-	A0A287AWG8	UPI000BAD728D	-	-	Ensembl	-	-	-	-	-	-
ASGA0051626	11:67775582-67775582	C	intron_variant	MODIFIER	DOCK9	ENSSSCG00000022112	Transcript	ENSSSCT00000065653.2	protein_coding	-	47/50	ENSSSCT00000065653.2:c.5629+1264T>G	-	-	-	-	-	-	rs80962112	-	-1	-	HGNC	HGNC:14132	-	-	A2	-	ENSSSCP00000043869	-	A0A287AJ01	UPI001234A2C7	-	-	Ensembl	-	-	-	-	-	-
ASGA0051626	11:67775582-67775582	C	intron_variant	MODIFIER	DOCK9	ENSSSCG00000022112	Transcript	ENSSSCT00000077600.1	protein_coding	-	49/52	ENSSSCT00000077600.1:c.5656+1264T>G	-	-	-	-	-	-	rs80962112	-	-1	-	HGNC	HGNC:14132	-	-	A2	-	ENSSSCP00000065047	-	A0A5G2QSS2	UPI0012349EAE	-	-	Ensembl	-	-	-	-	-	-
ASGA0051626	11:67775582-67775582	C	intron_variant	MODIFIER	DOCK9	100522271	Transcript	XM_005668506.3	protein_coding	-	51/54	XM_005668506.3:c.5734+1264T>G	-	-	-	-	-	-	rs80962112	-	-1	-	EntrezGene	HGNC:14132	-	-	-	-	XP_005668563.1	-	-	-	-	-	RefSeq	-	-	-	-	-	-
ASGA0051626	11:67775582-67775582	C	intron_variant	MODIFIER	DOCK9	100522271	Transcript	XM_021065817.1	protein_coding	-	52/55	XM_021065817.1:c.5881+1264T>G	-	-	-	-	-	-	rs80962112	-	-1	-	EntrezGene	HGNC:14132	-	-	-	-	XP_020921476.1	-	-	-	-	-	RefSeq	-	-	-	-	-	-
ASGA0051626	11:67775582-67775582	C	intron_variant	MODIFIER	DOCK9	100522271	Transcript	XM_021065818.1	protein_coding	-	52/55	XM_021065818.1:c.5848+1264T>G	-	-	-	-	-	-	rs80962112	-	-1	-	EntrezGene	HGNC:14132	-	-	-	-	XP_020921477.1	-	-	-	-	-	RefSeq	-	-	-	-	-	-
ASGA0051626	11:67775582-67775582	C	intron_variant	MODIFIER	DOCK9	100522271	Transcript	XM_021065819.1	protein_coding	-	52/55	XM_021065819.1:c.5845+1264T>G	-	-	-	-	-	-	rs80962112	-	-1	-	EntrezGene	HGNC:14132	-	-	-	-	XP_020921478.1	-	-	-	-	-	RefSeq	-	-	-	-	-	-
ASGA0051626	11:67775582-67775582	C	intron_variant	MODIFIER	DOCK9	100522271	Transcript	XM_021065821.1	protein_coding	-	50/53	XM_021065821.1:c.5839+1264T>G	-	-	-	-	-	-	rs80962112	-	-1	-	EntrezGene	HGNC:14132	-	-	-	-	XP_020921480.1	-	-	-	-	-	RefSeq	-	-	-	-	-	-
ASGA0051626	11:67775582-67775582	C	intron_variant	MODIFIER	DOCK9	100522271	Transcript	XM_021065822.1	protein_coding	-	52/55	XM_021065822.1:c.5812+1264T>G	-	-	-	-	-	-	rs80962112	-	-1	-	EntrezGene	HGNC:14132	-	-	-	-	XP_020921481.1	-	-	-	-	-	RefSeq	-	-	-	-	-	-
ASGA0051626	11:67775582-67775582	C	intron_variant	MODIFIER	DOCK9	100522271	Transcript	XM_021065823.1	protein_coding	-	52/55	XM_021065823.1:c.5881+1264T>G	-	-	-	-	-	-	rs80962112	-	-1	-	EntrezGene	HGNC:14132	-	-	-	-	XP_020921482.1	-	-	-	-	-	RefSeq	-	-	-	-	-	-
ASGA0051626	11:67775582-67775582	C	intron_variant	MODIFIER	DOCK9	100522271	Transcript	XM_021065824.1	protein_coding	-	51/54	XM_021065824.1:c.5803+1264T>G	-	-	-	-	-	-	rs80962112	-	-1	-	EntrezGene	HGNC:14132	-	-	-	-	XP_020921483.1	-	-	-	-	-	RefSeq	-	-	-	-	-	-
ASGA0051626	11:67775582-67775582	C	intron_variant	MODIFIER	DOCK9	100522271	Transcript	XM_021065825.1	protein_coding	-	52/55	XM_021065825.1:c.5788+1264T>G	-	-	-	-	-	-	rs80962112	-	-1	-	EntrezGene	HGNC:14132	-	-	-	-	XP_020921484.1	-	-	-	-	-	RefSeq	-	-	-	-	-	-
ASGA0051626	11:67775582-67775582	C	intron_variant	MODIFIER	DOCK9	100522271	Transcript	XM_021065826.1	protein_coding	-	52/55	XM_021065826.1:c.5779+1264T>G	-	-	-	-	-	-	rs80962112	-	-1	-	EntrezGene	HGNC:14132	-	-	-	-	XP_020921485.1	-	-	-	-	-	RefSeq	-	-	-	-	-	-
ASGA0051626	11:67775582-67775582	C	intron_variant	MODIFIER	DOCK9	100522271	Transcript	XM_021065827.1	protein_coding	-	52/55	XM_021065827.1:c.5776+1264T>G	-	-	-	-	-	-	rs80962112	-	-1	-	EntrezGene	HGNC:14132	-	-	-	-	XP_020921486.1	-	-	-	-	-	RefSeq	-	-	-	-	-	-
ASGA0051626	11:67775582-67775582	C	intron_variant	MODIFIER	DOCK9	100522271	Transcript	XM_021065828.1	protein_coding	-	51/54	XM_021065828.1:c.5767+1264T>G	-	-	-	-	-	-	rs80962112	-	-1	-	EntrezGene	HGNC:14132	-	-	-	-	XP_020921487.1	-	-	-	-	-	RefSeq	-	-	-	-	-	-
ASGA0051626	11:67775582-67775582	C	intron_variant	MODIFIER	DOCK9	100522271	Transcript	XM_021065829.1	protein_coding	-	52/56	XM_021065829.1:c.5881+1264T>G	-	-	-	-	-	-	rs80962112	-	-1	-	EntrezGene	HGNC:14132	-	-	-	-	XP_020921488.1	-	-	-	-	-	RefSeq	-	-	-	-	-	-
ASGA0051626	11:67775582-67775582	C	intron_variant	MODIFIER	DOCK9	100522271	Transcript	XM_021065830.1	protein_coding	-	49/52	XM_021065830.1:c.5761+1264T>G	-	-	-	-	-	-	rs80962112	-	-1	-	EntrezGene	HGNC:14132	-	-	-	-	XP_020921489.1	-	-	-	-	-	RefSeq	-	-	-	-	-	-
ASGA0051626	11:67775582-67775582	C	intron_variant	MODIFIER	DOCK9	100522271	Transcript	XM_021065832.1	protein_coding	-	52/55	XM_021065832.1:c.5752+1264T>G	-	-	-	-	-	-	rs80962112	-	-1	-	EntrezGene	HGNC:14132	-	-	-	-	XP_020921491.1	-	-	-	-	-	RefSeq	-	-	-	-	-	-
ASGA0051626	11:67775582-67775582	C	intron_variant	MODIFIER	DOCK9	100522271	Transcript	XM_021065833.1	protein_coding	-	50/53	XM_021065833.1:c.5746+1264T>G	-	-	-	-	-	-	rs80962112	-	-1	-	EntrezGene	HGNC:14132	-	-	-	-	XP_020921492.1	-	-	-	-	-	RefSeq	-	-	-	-	-	-
ASGA0051626	11:67775582-67775582	C	intron_variant	MODIFIER	DOCK9	100522271	Transcript	XM_021065834.1	protein_coding	-	49/52	XM_021065834.1:c.5728+1264T>G	-	-	-	-	-	-	rs80962112	-	-1	-	EntrezGene	HGNC:14132	-	-	-	-	XP_020921493.1	-	-	-	-	-	RefSeq	-	-	-	-	-	-
ASGA0051626	11:67775582-67775582	C	intron_variant	MODIFIER	DOCK9	100522271	Transcript	XM_021065835.1	protein_coding	-	51/54	XM_021065835.1:c.5710+1264T>G	-	-	-	-	-	-	rs80962112	-	-1	-	EntrezGene	HGNC:14132	-	-	-	-	XP_020921494.1	-	-	-	-	-	RefSeq	-	-	-	-	-	-
ASGA0051626	11:67775582-67775582	C	intron_variant	MODIFIER	DOCK9	100522271	Transcript	XM_021065836.1	protein_coding	-	51/54	XM_021065836.1:c.5701+1264T>G	-	-	-	-	-	-	rs80962112	-	-1	-	EntrezGene	HGNC:14132	-	-	-	-	XP_020921495.1	-	-	-	-	-	RefSeq	-	-	-	-	-	-
ASGA0051626	11:67775582-67775582	C	intron_variant	MODIFIER	DOCK9	100522271	Transcript	XM_021065837.1	protein_coding	-	49/52	XM_021065837.1:c.5692+1264T>G	-	-	-	-	-	-	rs80962112	-	-1	-	EntrezGene	HGNC:14132	-	-	-	-	XP_020921496.1	-	-	-	-	-	RefSeq	-	-	-	-	-	-
ASGA0051626	11:67775582-67775582	C	intron_variant	MODIFIER	DOCK9	100522271	Transcript	XM_021065838.1	protein_coding	-	51/55	XM_021065838.1:c.5803+1264T>G	-	-	-	-	-	-	rs80962112	-	-1	-	EntrezGene	HGNC:14132	-	-	-	-	XP_020921497.1	-	-	-	-	-	RefSeq	-	-	-	-	-	-
ASGA0051626	11:67775582-67775582	C	intron_variant	MODIFIER	DOCK9	100522271	Transcript	XM_021065839.1	protein_coding	-	49/52	XM_021065839.1:c.5668+1264T>G	-	-	-	-	-	-	rs80962112	-	-1	-	EntrezGene	HGNC:14132	-	-	-	-	XP_020921498.1	-	-	-	-	-	RefSeq	-	-	-	-	-	-
ASGA0051626	11:67775582-67775582	C	intron_variant	MODIFIER	DOCK9	100522271	Transcript	XM_021065840.1	protein_coding	-	49/52	XM_021065840.1:c.5659+1264T>G	-	-	-	-	-	-	rs80962112	-	-1	-	EntrezGene	HGNC:14132	-	-	-	-	XP_020921499.1	-	-	-	-	-	RefSeq	-	-	-	-	-	-
ASGA0051626	11:67775582-67775582	C	intron_variant	MODIFIER	DOCK9	100522271	Transcript	XM_021065842.1	protein_coding	-	49/52	XM_021065842.1:c.5635+1264T>G	-	-	-	-	-	-	rs80962112	-	-1	-	EntrezGene	HGNC:14132	-	-	-	-	XP_020921501.1	-	-	-	-	-	RefSeq	-	-	-	-	-	-
ASGA0051626	11:67775582-67775582	C	intron_variant	MODIFIER	DOCK9	100522271	Transcript	XM_021065843.1	protein_coding	-	49/52	XM_021065843.1:c.5632+1264T>G	-	-	-	-	-	-	rs80962112	-	-1	-	EntrezGene	HGNC:14132	-	-	-	-	XP_020921502.1	-	-	-	-	-	RefSeq	-	-	-	-	-	-
ASGA0051626	11:67775582-67775582	C	intron_variant	MODIFIER	DOCK9	100522271	Transcript	XM_021065844.1	protein_coding	-	49/52	XM_021065844.1:c.5692+1264T>G	-	-	-	-	-	-	rs80962112	-	-1	-	EntrezGene	HGNC:14132	-	-	-	-	XP_020921503.1	-	-	-	-	-	RefSeq	-	-	-	-	-	-
ASGA0051626	11:67775582-67775582	C	intron_variant	MODIFIER	DOCK9	100522271	Transcript	XM_021065845.1	protein_coding	-	51/55	XM_021065845.1:c.5734+1264T>G	-	-	-	-	-	-	rs80962112	-	-1	-	EntrezGene	HGNC:14132	-	-	-	-	XP_020921504.1	-	-	-	-	-	RefSeq	-	-	-	-	-	-
ASGA0051626	11:67775582-67775582	C	intron_variant	MODIFIER	DOCK9	100522271	Transcript	XM_021065846.1	protein_coding	-	50/53	XM_021065846.1:c.5803+1264T>G	-	-	-	-	-	-	rs80962112	-	-1	-	EntrezGene	HGNC:14132	-	-	-	-	XP_020921505.1	-	-	-	-	-	RefSeq	-	-	-	-	-	-
ASGA0051626	11:67775582-67775582	C	intron_variant	MODIFIER	DOCK9	100522271	Transcript	XM_021065847.1	protein_coding	-	49/52	XM_021065847.1:c.5725+1264T>G	-	-	-	-	-	-	rs80962112	-	-1	-	EntrezGene	HGNC:14132	-	-	-	-	XP_020921506.1	-	-	-	-	-	RefSeq	-	-	-	-	-	-
ASGA0051626	11:67775582-67775582	C	intron_variant,non_coding_transcript_variant	MODIFIER	DOCK9	100522271	Transcript	XR_002336733.1	misc_RNA	-	50/53	XR_002336733.1:n.5815+1264T>G	-	-	-	-	-	-	rs80962112	-	-1	-	EntrezGene	HGNC:14132	-	-	-	-	-	-	-	-	-	-	RefSeq	-	-	-	-	-	-
WU_10.2_11_75048584	11:67814604-67814604	G	intron_variant	MODIFIER	DOCK9	ENSSSCG00000022112	Transcript	ENSSSCT00000027258.3	protein_coding	-	39/53	ENSSSCT00000027258.3:c.4147+2004T>C	-	-	-	-	-	-	rs330628589	-	-1	-	HGNC	HGNC:14132	-	-	A2	-	ENSSSCP00000027581	-	I3LTY2	UPI000BAD86E1	-	-	Ensembl	-	-	-	-	-	-
WU_10.2_11_75048584	11:67814604-67814604	G	intron_variant	MODIFIER	DOCK9	ENSSSCG00000022112	Transcript	ENSSSCT00000042343.2	protein_coding	-	38/53	ENSSSCT00000042343.2:c.4198+2602T>C	-	-	-	-	-	-	rs330628589	-	-1	-	HGNC	HGNC:14132	-	-	A2	-	ENSSSCP00000046406	-	A0A287AR72	UPI000BADA0CF	-	-	Ensembl	-	-	-	-	-	-
WU_10.2_11_75048584	11:67814604-67814604	G	intron_variant	MODIFIER	DOCK9	ENSSSCG00000022112	Transcript	ENSSSCT00000048894.2	protein_coding	-	38/53	ENSSSCT00000048894.2:c.4105+2004T>C	-	-	-	-	-	-	rs330628589	-	-1	-	HGNC	HGNC:14132	-	-	A2	-	ENSSSCP00000039278	-	A0A287A686	UPI00123622D1	-	-	Ensembl	-	-	-	-	-	-
WU_10.2_11_75048584	11:67814604-67814604	G	intron_variant	MODIFIER	DOCK9	ENSSSCG00000022112	Transcript	ENSSSCT00000057898.2	protein_coding	-	38/56	ENSSSCT00000057898.2:c.4129+2602T>C	-	-	-	-	-	-	rs330628589	-	-1	-	HGNC	HGNC:14132	-	-	A2	-	ENSSSCP00000049181	-	A0A287AZ64	UPI0012362B5C	-	-	Ensembl	-	-	-	-	-	-
WU_10.2_11_75048584	11:67814604-67814604	G	intron_variant	MODIFIER	DOCK9	ENSSSCG00000022112	Transcript	ENSSSCT00000060404.2	protein_coding	-	38/53	ENSSSCT00000060404.2:c.4714+2602T>C	-	-	-	-	-	-	rs330628589	-	-1	-	HGNC	HGNC:14132	-	-	P5	-	ENSSSCP00000048075	-	A0A287AVY9	UPI000BAD9574	-	-	Ensembl	-	-	-	-	-	-
WU_10.2_11_75048584	11:67814604-67814604	G	intron_variant	MODIFIER	DOCK9	ENSSSCG00000022112	Transcript	ENSSSCT00000060708.2	protein_coding	-	38/52	ENSSSCT00000060708.2:c.4165+2602T>C	-	-	-	-	-	-	rs330628589	-	-1	-	HGNC	HGNC:14132	-	-	A2	-	ENSSSCP00000058090	-	A0A287BN98	UPI000A2B84E2	-	-	Ensembl	-	-	-	-	-	-
WU_10.2_11_75048584	11:67814604-67814604	G	intron_variant	MODIFIER	DOCK9	ENSSSCG00000022112	Transcript	ENSSSCT00000064935.2	protein_coding	-	37/51	ENSSSCT00000064935.2:c.3901+2602T>C	-	-	-	-	-	-	rs330628589	-	-1	-	HGNC	HGNC:14132	-	-	A2	-	ENSSSCP00000039206	-	A0A287A5R6	UPI0012359B46	-	-	Ensembl	-	-	-	-	-	-
WU_10.2_11_75048584	11:67814604-67814604	G	intron_variant	MODIFIER	DOCK9	ENSSSCG00000022112	Transcript	ENSSSCT00000065095.2	protein_coding	-	41/55	ENSSSCT00000065095.2:c.3916+2602T>C	-	-	-	-	-	-	rs330628589	-	-1	-	HGNC	HGNC:14132	-	-	A2	-	ENSSSCP00000048478	-	A0A287AWG8	UPI000BAD728D	-	-	Ensembl	-	-	-	-	-	-
WU_10.2_11_75048584	11:67814604-67814604	G	intron_variant	MODIFIER	DOCK9	ENSSSCG00000022112	Transcript	ENSSSCT00000065653.2	protein_coding	-	36/50	ENSSSCT00000065653.2:c.4103-5061T>C	-	-	-	-	-	-	rs330628589	-	-1	-	HGNC	HGNC:14132	-	-	A2	-	ENSSSCP00000043869	-	A0A287AJ01	UPI001234A2C7	-	-	Ensembl	-	-	-	-	-	-
WU_10.2_11_75048584	11:67814604-67814604	G	intron_variant	MODIFIER	DOCK9	ENSSSCG00000022112	Transcript	ENSSSCT00000077600.1	protein_coding	-	38/52	ENSSSCT00000077600.1:c.4129+2602T>C	-	-	-	-	-	-	rs330628589	-	-1	-	HGNC	HGNC:14132	-	-	A2	-	ENSSSCP00000065047	-	A0A5G2QSS2	UPI0012349EAE	-	-	Ensembl	-	-	-	-	-	-
WU_10.2_11_75048584	11:67814604-67814604	G	intron_variant	MODIFIER	DOCK9	100522271	Transcript	XM_005668506.3	protein_coding	-	38/54	XM_005668506.3:c.4165+2602T>C	-	-	-	-	-	-	rs330628589	-	-1	-	EntrezGene	HGNC:14132	-	-	-	-	XP_005668563.1	-	-	-	-	-	RefSeq	-	-	-	-	-	-
WU_10.2_11_75048584	11:67814604-67814604	G	intron_variant	MODIFIER	DOCK9	100522271	Transcript	XM_021065817.1	protein_coding	-	38/55	XM_021065817.1:c.4234+2602T>C	-	-	-	-	-	-	rs330628589	-	-1	-	EntrezGene	HGNC:14132	-	-	-	-	XP_020921476.1	-	-	-	-	-	RefSeq	-	-	-	-	-	-
WU_10.2_11_75048584	11:67814604-67814604	G	intron_variant	MODIFIER	DOCK9	100522271	Transcript	XM_021065818.1	protein_coding	-	38/55	XM_021065818.1:c.4201+2602T>C	-	-	-	-	-	-	rs330628589	-	-1	-	EntrezGene	HGNC:14132	-	-	-	-	XP_020921477.1	-	-	-	-	-	RefSeq	-	-	-	-	-	-
WU_10.2_11_75048584	11:67814604-67814604	G	intron_variant	MODIFIER	DOCK9	100522271	Transcript	XM_021065819.1	protein_coding	-	38/55	XM_021065819.1:c.4198+2602T>C	-	-	-	-	-	-	rs330628589	-	-1	-	EntrezGene	HGNC:14132	-	-	-	-	XP_020921478.1	-	-	-	-	-	RefSeq	-	-	-	-	-	-
WU_10.2_11_75048584	11:67814604-67814604	G	intron_variant	MODIFIER	DOCK9	100522271	Transcript	XM_021065821.1	protein_coding	-	38/53	XM_021065821.1:c.4234+2602T>C	-	-	-	-	-	-	rs330628589	-	-1	-	EntrezGene	HGNC:14132	-	-	-	-	XP_020921480.1	-	-	-	-	-	RefSeq	-	-	-	-	-	-
WU_10.2_11_75048584	11:67814604-67814604	G	intron_variant	MODIFIER	DOCK9	100522271	Transcript	XM_021065822.1	protein_coding	-	38/55	XM_021065822.1:c.4165+2602T>C	-	-	-	-	-	-	rs330628589	-	-1	-	EntrezGene	HGNC:14132	-	-	-	-	XP_020921481.1	-	-	-	-	-	RefSeq	-	-	-	-	-	-
WU_10.2_11_75048584	11:67814604-67814604	G	intron_variant	MODIFIER	DOCK9	100522271	Transcript	XM_021065823.1	protein_coding	-	38/55	XM_021065823.1:c.4234+2602T>C	-	-	-	-	-	-	rs330628589	-	-1	-	EntrezGene	HGNC:14132	-	-	-	-	XP_020921482.1	-	-	-	-	-	RefSeq	-	-	-	-	-	-
WU_10.2_11_75048584	11:67814604-67814604	G	intron_variant	MODIFIER	DOCK9	100522271	Transcript	XM_021065824.1	protein_coding	-	38/54	XM_021065824.1:c.4234+2602T>C	-	-	-	-	-	-	rs330628589	-	-1	-	EntrezGene	HGNC:14132	-	-	-	-	XP_020921483.1	-	-	-	-	-	RefSeq	-	-	-	-	-	-
WU_10.2_11_75048584	11:67814604-67814604	G	intron_variant	MODIFIER	DOCK9	100522271	Transcript	XM_021065825.1	protein_coding	-	38/55	XM_021065825.1:c.4141+2004T>C	-	-	-	-	-	-	rs330628589	-	-1	-	EntrezGene	HGNC:14132	-	-	-	-	XP_020921484.1	-	-	-	-	-	RefSeq	-	-	-	-	-	-
WU_10.2_11_75048584	11:67814604-67814604	G	intron_variant	MODIFIER	DOCK9	100522271	Transcript	XM_021065826.1	protein_coding	-	38/55	XM_021065826.1:c.4132+2602T>C	-	-	-	-	-	-	rs330628589	-	-1	-	EntrezGene	HGNC:14132	-	-	-	-	XP_020921485.1	-	-	-	-	-	RefSeq	-	-	-	-	-	-
WU_10.2_11_75048584	11:67814604-67814604	G	intron_variant	MODIFIER	DOCK9	100522271	Transcript	XM_021065827.1	protein_coding	-	38/55	XM_021065827.1:c.4129+2602T>C	-	-	-	-	-	-	rs330628589	-	-1	-	EntrezGene	HGNC:14132	-	-	-	-	XP_020921486.1	-	-	-	-	-	RefSeq	-	-	-	-	-	-
WU_10.2_11_75048584	11:67814604-67814604	G	intron_variant	MODIFIER	DOCK9	100522271	Transcript	XM_021065828.1	protein_coding	-	38/54	XM_021065828.1:c.4198+2602T>C	-	-	-	-	-	-	rs330628589	-	-1	-	EntrezGene	HGNC:14132	-	-	-	-	XP_020921487.1	-	-	-	-	-	RefSeq	-	-	-	-	-	-
WU_10.2_11_75048584	11:67814604-67814604	G	intron_variant	MODIFIER	DOCK9	100522271	Transcript	XM_021065829.1	protein_coding	-	38/56	XM_021065829.1:c.4234+2602T>C	-	-	-	-	-	-	rs330628589	-	-1	-	EntrezGene	HGNC:14132	-	-	-	-	XP_020921488.1	-	-	-	-	-	RefSeq	-	-	-	-	-	-
WU_10.2_11_75048584	11:67814604-67814604	G	intron_variant	MODIFIER	DOCK9	100522271	Transcript	XM_021065830.1	protein_coding	-	38/52	XM_021065830.1:c.4234+2602T>C	-	-	-	-	-	-	rs330628589	-	-1	-	EntrezGene	HGNC:14132	-	-	-	-	XP_020921489.1	-	-	-	-	-	RefSeq	-	-	-	-	-	-
WU_10.2_11_75048584	11:67814604-67814604	G	intron_variant	MODIFIER	DOCK9	100522271	Transcript	XM_021065832.1	protein_coding	-	38/55	XM_021065832.1:c.4105+2004T>C	-	-	-	-	-	-	rs330628589	-	-1	-	EntrezGene	HGNC:14132	-	-	-	-	XP_020921491.1	-	-	-	-	-	RefSeq	-	-	-	-	-	-
WU_10.2_11_75048584	11:67814604-67814604	G	intron_variant	MODIFIER	DOCK9	100522271	Transcript	XM_021065833.1	protein_coding	-	38/53	XM_021065833.1:c.4141+2004T>C	-	-	-	-	-	-	rs330628589	-	-1	-	EntrezGene	HGNC:14132	-	-	-	-	XP_020921492.1	-	-	-	-	-	RefSeq	-	-	-	-	-	-
WU_10.2_11_75048584	11:67814604-67814604	G	intron_variant	MODIFIER	DOCK9	100522271	Transcript	XM_021065834.1	protein_coding	-	38/52	XM_021065834.1:c.4201+2602T>C	-	-	-	-	-	-	rs330628589	-	-1	-	EntrezGene	HGNC:14132	-	-	-	-	XP_020921493.1	-	-	-	-	-	RefSeq	-	-	-	-	-	-
WU_10.2_11_75048584	11:67814604-67814604	G	intron_variant	MODIFIER	DOCK9	100522271	Transcript	XM_021065835.1	protein_coding	-	38/54	XM_021065835.1:c.4141+2004T>C	-	-	-	-	-	-	rs330628589	-	-1	-	EntrezGene	HGNC:14132	-	-	-	-	XP_020921494.1	-	-	-	-	-	RefSeq	-	-	-	-	-	-
WU_10.2_11_75048584	11:67814604-67814604	G	intron_variant	MODIFIER	DOCK9	100522271	Transcript	XM_021065836.1	protein_coding	-	38/54	XM_021065836.1:c.4132+2602T>C	-	-	-	-	-	-	rs330628589	-	-1	-	EntrezGene	HGNC:14132	-	-	-	-	XP_020921495.1	-	-	-	-	-	RefSeq	-	-	-	-	-	-
WU_10.2_11_75048584	11:67814604-67814604	G	intron_variant	MODIFIER	DOCK9	100522271	Transcript	XM_021065837.1	protein_coding	-	38/52	XM_021065837.1:c.4165+2602T>C	-	-	-	-	-	-	rs330628589	-	-1	-	EntrezGene	HGNC:14132	-	-	-	-	XP_020921496.1	-	-	-	-	-	RefSeq	-	-	-	-	-	-
WU_10.2_11_75048584	11:67814604-67814604	G	intron_variant	MODIFIER	DOCK9	100522271	Transcript	XM_021065838.1	protein_coding	-	38/55	XM_021065838.1:c.4234+2602T>C	-	-	-	-	-	-	rs330628589	-	-1	-	EntrezGene	HGNC:14132	-	-	-	-	XP_020921497.1	-	-	-	-	-	RefSeq	-	-	-	-	-	-
WU_10.2_11_75048584	11:67814604-67814604	G	intron_variant	MODIFIER	DOCK9	100522271	Transcript	XM_021065839.1	protein_coding	-	38/52	XM_021065839.1:c.4141+2004T>C	-	-	-	-	-	-	rs330628589	-	-1	-	EntrezGene	HGNC:14132	-	-	-	-	XP_020921498.1	-	-	-	-	-	RefSeq	-	-	-	-	-	-
WU_10.2_11_75048584	11:67814604-67814604	G	intron_variant	MODIFIER	DOCK9	100522271	Transcript	XM_021065840.1	protein_coding	-	38/52	XM_021065840.1:c.4132+2602T>C	-	-	-	-	-	-	rs330628589	-	-1	-	EntrezGene	HGNC:14132	-	-	-	-	XP_020921499.1	-	-	-	-	-	RefSeq	-	-	-	-	-	-
WU_10.2_11_75048584	11:67814604-67814604	G	intron_variant	MODIFIER	DOCK9	100522271	Transcript	XM_021065842.1	protein_coding	-	38/52	XM_021065842.1:c.4108+2004T>C	-	-	-	-	-	-	rs330628589	-	-1	-	EntrezGene	HGNC:14132	-	-	-	-	XP_020921501.1	-	-	-	-	-	RefSeq	-	-	-	-	-	-
WU_10.2_11_75048584	11:67814604-67814604	G	intron_variant	MODIFIER	DOCK9	100522271	Transcript	XM_021065843.1	protein_coding	-	38/52	XM_021065843.1:c.4105+2004T>C	-	-	-	-	-	-	rs330628589	-	-1	-	EntrezGene	HGNC:14132	-	-	-	-	XP_020921502.1	-	-	-	-	-	RefSeq	-	-	-	-	-	-
WU_10.2_11_75048584	11:67814604-67814604	G	intron_variant	MODIFIER	DOCK9	100522271	Transcript	XM_021065844.1	protein_coding	-	38/52	XM_021065844.1:c.4165+2602T>C	-	-	-	-	-	-	rs330628589	-	-1	-	EntrezGene	HGNC:14132	-	-	-	-	XP_020921503.1	-	-	-	-	-	RefSeq	-	-	-	-	-	-
WU_10.2_11_75048584	11:67814604-67814604	G	intron_variant	MODIFIER	DOCK9	100522271	Transcript	XM_021065845.1	protein_coding	-	38/55	XM_021065845.1:c.4165+2602T>C	-	-	-	-	-	-	rs330628589	-	-1	-	EntrezGene	HGNC:14132	-	-	-	-	XP_020921504.1	-	-	-	-	-	RefSeq	-	-	-	-	-	-
WU_10.2_11_75048584	11:67814604-67814604	G	intron_variant	MODIFIER	DOCK9	100522271	Transcript	XM_021065846.1	protein_coding	-	38/53	XM_021065846.1:c.4198+2602T>C	-	-	-	-	-	-	rs330628589	-	-1	-	EntrezGene	HGNC:14132	-	-	-	-	XP_020921505.1	-	-	-	-	-	RefSeq	-	-	-	-	-	-
WU_10.2_11_75048584	11:67814604-67814604	G	intron_variant	MODIFIER	DOCK9	100522271	Transcript	XM_021065847.1	protein_coding	-	38/52	XM_021065847.1:c.4198+2602T>C	-	-	-	-	-	-	rs330628589	-	-1	-	EntrezGene	HGNC:14132	-	-	-	-	XP_020921506.1	-	-	-	-	-	RefSeq	-	-	-	-	-	-
WU_10.2_11_75048584	11:67814604-67814604	G	intron_variant,non_coding_transcript_variant	MODIFIER	DOCK9	100522271	Transcript	XR_002336733.1	misc_RNA	-	39/53	XR_002336733.1:n.4288+2602T>C	-	-	-	-	-	-	rs330628589	-	-1	-	EntrezGene	HGNC:14132	-	-	-	-	-	-	-	-	-	-	RefSeq	-	-	-	-	-	-
ALGA0063555	11:70259989-70259989	A	intron_variant	MODIFIER	FGF14	ENSSSCG00000009527	Transcript	ENSSSCT00000010445.4	protein_coding	-	3/4	ENSSSCT00000010445.4:c.409-2225C>T	-	-	-	-	-	-	rs80975370	-	-1	-	HGNC	HGNC:3671	-	-	P1	-	ENSSSCP00000010174	-	F1RP08,A0A4X1U6J7	UPI000155FBD0	-	-	Ensembl	-	-	-	-	-	-
ALGA0063555	11:70259989-70259989	A	intron_variant	MODIFIER	FGF14	ENSSSCG00000009527	Transcript	ENSSSCT00000077164.1	protein_coding	-	3/4	ENSSSCT00000077164.1:c.424-2225C>T	-	-	-	-	-	-	rs80975370	-	-1	-	HGNC	HGNC:3671	-	-	-	-	ENSSSCP00000072129	-	A0A5G2RJN8,A0A4X1UAU0	UPI0001519119	-	-	Ensembl	-	-	-	-	-	-
ALGA0063555	11:70259989-70259989	A	intron_variant	MODIFIER	FGF14	100156844	Transcript	XM_001924895.6	protein_coding	-	3/4	XM_001924895.6:c.409-2225C>T	-	-	-	-	-	-	rs80975370	-	-1	-	EntrezGene	HGNC:3671	-	-	-	-	XP_001924930.1	-	-	-	-	-	RefSeq	-	-	-	-	-	-
ALGA0063555	11:70259989-70259989	A	intron_variant	MODIFIER	FGF14	100156844	Transcript	XM_021065381.1	protein_coding	-	3/4	XM_021065381.1:c.424-2225C>T	-	-	-	-	-	-	rs80975370	-	-1	-	EntrezGene	HGNC:3671	-	-	-	-	XP_020921040.1	-	-	-	-	-	RefSeq	-	-	-	-	-	-
ALGA0063555	11:70259989-70259989	A	intron_variant	MODIFIER	FGF14	100156844	Transcript	XM_021065382.1	protein_coding	-	3/4	XM_021065382.1:c.157-2225C>T	-	-	-	-	-	-	rs80975370	-	-1	-	EntrezGene	HGNC:3671	-	-	-	-	XP_020921041.1	-	-	-	-	-	RefSeq	-	-	-	-	-	-
ASGA0088514	11:71386065-71386065	C	intergenic_variant	MODIFIER	-	-	-	-	-	-	-	-	-	-	-	-	-	-	rs81477798	-	-	-	-	-	-	-	-	-	-	-	-	-	-	-	-	-	-	-	-	-	-
MARC0017453	11:72012487-72012487	T	intergenic_variant	MODIFIER	-	-	-	-	-	-	-	-	-	-	-	-	-	-	rs80816195	-	-	-	-	-	-	-	-	-	-	-	-	-	-	-	-	-	-	-	-	-	-
WU_10.2_11_79711527	11:72371955-72371955	A	intergenic_variant	MODIFIER	-	-	-	-	-	-	-	-	-	-	-	-	-	-	rs344060164	-	-	-	-	-	-	-	-	-	-	-	-	-	-	-	-	-	-	-	-	-	-
WU_10.2_11_80933688	11:73611634-73611634	C	intergenic_variant	MODIFIER	-	-	-	-	-	-	-	-	-	-	-	-	-	-	rs339150930	-	-	-	-	-	-	-	-	-	-	-	-	-	-	-	-	-	-	-	-	-	-
ALGA0063891	11:73978757-73978757	T	intron_variant,non_coding_transcript_variant	MODIFIER	-	ENSSSCG00000045311	Transcript	ENSSSCT00000086406.1	lncRNA	-	1/1	ENSSSCT00000086406.1:n.929+1844G>A	-	-	-	-	-	-	rs80971043	-	-1	-	-	-	-	-	-	-	-	-	-	-	-	-	Ensembl	-	-	-	-	-	-
ASGA0099981	11:75207205-75207205	G	intron_variant	MODIFIER	FAM155A	ENSSSCG00000040130	Transcript	ENSSSCT00000040694.2	protein_coding	-	1/2	ENSSSCT00000040694.2:c.906+135920A>C	-	-	-	-	-	-	rs81320619	-	-1	-	HGNC	HGNC:33877	-	-	P1	-	ENSSSCP00000032837	-	A0A286ZN04,A0A4X1U7W3	UPI0001E87EB0	-	-	Ensembl	-	-	-	-	-	-
ASGA0099981	11:75207205-75207205	G	downstream_gene_variant	MODIFIER	-	ENSSSCG00000044600	Transcript	ENSSSCT00000086389.1	pseudogene	-	-	-	-	-	-	-	-	-	rs81320619	3528	-1	-	-	-	-	-	-	-	-	-	-	-	-	-	Ensembl	-	-	-	-	-	-
ASGA0099981	11:75207205-75207205	G	intron_variant	MODIFIER	FAM155A	102159180	Transcript	XM_021065383.1	protein_coding	-	1/2	XM_021065383.1:c.906+135920A>C	-	-	-	-	-	-	rs81320619	-	-1	-	EntrezGene	HGNC:33877	-	-	-	-	XP_020921042.1	-	-	-	-	-	RefSeq	-	-	-	-	-	-
ASGA0099981	11:75207205-75207205	G	intron_variant	MODIFIER	FAM155A	102159180	Transcript	XM_021065384.1	protein_coding	-	1/3	XM_021065384.1:c.906+135920A>C	-	-	-	-	-	-	rs81320619	-	-1	-	EntrezGene	HGNC:33877	-	-	-	-	XP_020921043.1	-	-	-	-	-	RefSeq	-	-	-	-	-	-
WU_10.2_11_83286917	11:75806087-75806087	C	intron_variant	MODIFIER	-	ENSSSCG00000009543	Transcript	ENSSSCT00000010461.4	protein_coding	-	1/25	ENSSSCT00000010461.4:c.-38-56542T>C	-	-	-	-	-	-	rs80939526	-	1	-	-	-	-	-	P1	-	ENSSSCP00000010189	-	F1RLN9	UPI001235E013	-	-	Ensembl	-	-	-	-	-	-
WU_10.2_11_83286917	11:75806087-75806087	C	intron_variant	MODIFIER	MYO16	102161679	Transcript	XM_021065905.1	protein_coding	-	1/34	XM_021065905.1:c.-38-56542T>C	-	-	-	-	-	-	rs80939526	-	1	-	EntrezGene	-	-	-	-	-	XP_020921564.1	-	-	-	-	-	RefSeq	-	-	-	-	-	-
ASGA0052404	11:77953491-77953491	G	intergenic_variant	MODIFIER	-	-	-	-	-	-	-	-	-	-	-	-	-	-	rs81432058	-	-	-	-	-	-	-	-	-	-	-	-	-	-	-	-	-	-	-	-	-	-
MARC0058097	11:78818688-78818688	C	intron_variant	MODIFIER	TMEM255B	ENSSSCG00000009564	Transcript	ENSSSCT00000010485.4	protein_coding	-	1/7	ENSSSCT00000010485.4:c.55+1712T>C	-	-	-	-	-	-	rs81247576	-	1	-	HGNC	HGNC:28297	-	-	-	-	ENSSSCP00000010213	-	F1RN33	UPI000BAD614A	-	-	Ensembl	-	-	-	-	-	-
MARC0058097	11:78818688-78818688	C	intron_variant	MODIFIER	TMEM255B	ENSSSCG00000009564	Transcript	ENSSSCT00000038343.2	protein_coding	-	1/8	ENSSSCT00000038343.2:c.55+1712T>C	-	-	-	-	-	-	rs81247576	-	1	-	HGNC	HGNC:28297	-	-	P1	-	ENSSSCP00000050029	-	A0A287B0T4	UPI00025E0066	-	-	Ensembl	-	-	-	-	-	-
MARC0058097	11:78818688-78818688	C	intron_variant	MODIFIER	TMEM255B	100738464	Transcript	XM_005653841.3	protein_coding	-	1/8	XM_005653841.3:c.55+1712T>C	-	-	-	-	-	-	rs81247576	-	1	-	EntrezGene	HGNC:28297	-	-	-	-	XP_005653898.1	-	-	-	-	-	RefSeq	-	-	-	-	-	-
MARC0058097	11:78818688-78818688	C	intron_variant	MODIFIER	TMEM255B	100738464	Transcript	XM_013978996.2	protein_coding	-	1/8	XM_013978996.2:c.67+1700T>C	-	-	-	-	-	-	rs81247576	-	1	-	EntrezGene	HGNC:28297	-	-	-	-	XP_013834450.1	-	-	-	-	-	RefSeq	-	-	-	-	-	-
WU_10.2_12_1349252	12:1456379-1456379	A	intergenic_variant	MODIFIER	-	-	-	-	-	-	-	-	-	-	-	-	-	-	rs338389994	-	-	-	-	-	-	-	-	-	-	-	-	-	-	-	-	-	-	-	-	-	-
WU_10.2_12_1541669	12:1635962-1635962	C	intron_variant	MODIFIER	BAIAP2	ENSSSCG00000017142	Transcript	ENSSSCT00000018662.4	protein_coding	-	4/14	ENSSSCT00000018662.4:c.218-2514A>G	-	-	-	-	-	-	rs318804933	-	-1	-	HGNC	HGNC:947	-	-	P5	-	ENSSSCP00000018161	-	F1RZB0,A0A4X1UDN1	UPI0003AEF587	-	-	Ensembl	-	-	-	-	-	-
WU_10.2_12_1541669	12:1635962-1635962	C	intron_variant	MODIFIER	BAIAP2	ENSSSCG00000017142	Transcript	ENSSSCT00000049168.2	protein_coding	-	3/16	ENSSSCT00000049168.2:c.218-2514A>G	-	-	-	-	-	-	rs318804933	-	-1	-	HGNC	HGNC:947	-	-	A1	-	ENSSSCP00000059340	-	A0A287BRR9,A0A4X1UGM2	UPI0003AEA612	-	-	Ensembl	-	-	-	-	-	-
WU_10.2_12_1541669	12:1635962-1635962	C	intron_variant	MODIFIER	BAIAP2	ENSSSCG00000017142	Transcript	ENSSSCT00000054836.2	protein_coding	-	3/14	ENSSSCT00000054836.2:c.218-2514A>G	-	-	-	-	-	-	rs318804933	-	-1	-	HGNC	HGNC:947	-	-	-	-	ENSSSCP00000056825	-	A0A287BKX8,A0A4X1UG34	UPI000BAD98C4	-	-	Ensembl	-	-	-	-	-	-
[truncated: 5,454 more rows]

## Sheet: Supp. Table 3 Plink
Supp . Table 3. Plink output
[truncated: 16,383 more rows]

## Sheet: Supp Table 4. Plink VEP
Supp Table 4. Plink VEP
[truncated: 16,383 more rows]

## Sheet: Supp. Tables 5 and 6
Suppl. Table 5 . Significant SNPs for PSL in Landrace												Suppl. Table 6 . Significant SNPs for PSL in Large White
[truncated: 129 more rows]

[truncated: 2 more sheets: Supp Table 7, Supp Table 8]
